# Supplementary material
Source: publisher figshare collection journal article supplement (https://rs.figshare.com/ndownloader/files/13292483)
Supplement: Supplementary file 1 [file 13292483]

## Sheet: KS-Test Percent Lineal Kin
Raider's Unique ID #	The percentage of lineal kin represented in Ego's life	A Binary variable the allots lineal kin into one of two categories: Ego's Kin University or Ego's Raiding Network
Ego ID	Percent Lineal Kin	Dummy (0=Kin Universe; 1=Raid Network)
2013	0.534759	0
2026	0.347295	0
2040	0.24199	0
2046	0.357236	0
2050	0.24199	0
2057	0.24199	0
2076	0.474966	0
2077	0.474966	0
2081	0.265982	0
2083	0.280033	0
2085	0.280033	0
2086	0.280033	0
2088	0.618337	0
2091	0.60407	0
2092	0.60407	0
2098	0.448489	0
2099	0.448489	0
2120	0.60407	0
2125	0.618337	0
2135	0.384725	0
2148	0.320463	0
2149	0.320463	0
2153	0.320463	0
2157	0.252758	0
2158	0.618337	0
2172	0.481908	0
2194	0.367734	0
2211	0.314121	0
2279	0.673077	0
2328	0.334586	0
2426	0.280033	0
2458	0.265982	0
2460	0.931034	0
2505	0.618337	0
2541	0.5209	0
2543	0.334586	0
2556	0.280033	0
2620	0.307229	0
2631	0.142959	0
2685	0.142959	0
2699	0.142959	0
2743	0.142959	0
2746	0.303521	0
2747	0.60407	0
2783	0.934615	0
4044	0.107879	0
2791	0.474966	0
2801	0.570858	0
2806	0.931034	0
2807	0.931034	0
2809	0.931034	0
2811	0.931034	0
2822	0.0878378	0
2836	0.503906	0
2844	0.479501	0
2852	0.252758	0
2866	0.503906	0
2872	0.479501	0
2916	0.934615	0
2917	0.934615	0
2918	0.934615	0
2919	0.934615	0
2926	0.233954	0
2936	0.411557	0
3045	0.24199	0
3084	0.23476	0
3088	0.286082	0
3090	0.286082	0
3100	0.283272	0
3200	0.934615	0
3208	0.934615	0
3210	0.934615	0
3501	0.160457	0
3696	0.265982	0
3757	0.166016	0
3768	0.0839286	0
3769	0.0839286	0
3793	0.534759	0
3813	0.0878378	0
4401	0.143742	0
4437	0.245007	0
2013	0	1
2026	0.285714	1
2040	0.152542	1
2046	0.265306	1
2050	0.195652	1
2057	0.235294	1
2076	0.6	1
2077	0.294118	1
2081	0.25641	1
2083	0.435897	1
2085	0.447368	1
2086	0.8	1
2088	0.34375	1
2091	0.692308	1
2092	0.8	1
2098	0.642857	1
2099	0	1
2120	0.230769	1
2125	0.34375	1
2135	0.5	1
2148	0.285714	1
2149	0.235294	1
2153	0.318182	1
2157	0.129032	1
2158	0.428571	1
2172	0.25	1
2194	0.424242	1
2211	0	1
2279	0	1
2328	0.204082	1
2426	0.351852	1
2458	0.307692	1
2460	0.555556	1
2505	0	1
2541	0.142857	1
2543	0.310345	1
2556	0.428571	1
2620	0.222222	1
2631	0.2	1
2685	0.25	1
2699	0.2	1
2743	0.28	1
2746	0.269231	1
2747	0.318182	1
2783	0.757576	1
4044	0.030303	1
2791	0.5	1
2801	0.125	1
2806	0.742857	1
2807	0.520833	1
2809	0.581395	1
2811	0.757576	1
2822	0.0714286	1
2836	0.272727	1
2844	0.266667	1
2852	0.0909091	1
2866	0.375	1
2872	0.235294	1
2916	0.490909	1
2917	0.5	1
2918	0.657895	1
2919	0.757576	1
2926	0.0392157	1
2936	0.142857	1
3045	0.235294	1
3084	0.235294	1
3088	0.25	1
3090	0.321429	1
3100	0.111111	1
3200	0.581395	1
3208	0.757576	1
3210	0.757576	1
3501	0.0909091	1
3696	0.26087	1
3757	0.1	1
3768	0.117647	1
3769	0.142857	1
3793	0	1
3813	0.2	1
4401	0.1	1
4437	0	1

## Sheet: Ego Analyses
Raider's Unique ID #	Ego's Year of Borth	The Year in which Ego Was Pacified or Died if he was never pacified	The number of years lapsed between ego's birth and the year at which ego was pacified or died	The territorial group to which ego belonged	The Age when ego first raided	The number of times ego raided over his life course	Ego's total number of raid partners	The number of Ego's raid partners who were lineal kin	The percentage of Ego's raid partners who were lineal kin	The number of Ego's raid partners who were non-lineal kin	The number of genetic Kin in Ego's life	The Percentage of Lineal Kin in Ego's life	Ego's total number of spouses	The # Raid Partners with whom Ego Arranged a Marriage	Ego's total number of offspring	Binary Variable: Did Ego marry his raid partner's daughter, sister, or half-sister (1=Yes; 0=No)
Ego ID	EGO YOB	Year of Pacification or Death	Raiding Window	Group	Age at First Raid	Times Ego Raided	Raid Network Size	New Raid Network Size: Lineal Members	New Raid Network: Percent Lineal	New Raid Network: Non Lineal Members	Kin Universe Size	Kin Universe: Percent Lineal Kin	# Spouses	# Raid Partners with whom Ego Arranged a Marriage	# Offspring	Married Raid Partne'sr Daughter, Sister, or Half-Sister (0=No; 1=Yes)
2013	1934	1956	22	1	15	2	6	0	0	6	187	0.534759	2	0	3	1
2026	1940	1958	18	1	9	4	7	2	0.285714	5	573	0.347295	1	1	9	1
2040	1939	1971	32	3	18	9	59	9	0.152542	50	1186	0.24199	1	1	4	1
2046	1927	1971	44	3	10	8	49	13	0.265306	36	767	0.357236	3	4	28	1
2050	1950	1971	23	3	17	4	46	9	0.195652	37	1186	0.24199	1	2	5	1
2057	1951	1971	20	3	14	3	34	8	0.235294	26	1186	0.24199	1	2	12	0
2076	1936	1971	35	3	18	1	10	6	0.6	4	739	0.474966	2	1	9	0
2077	1945	1971	26	3	20	2	34	10	0.294118	24	739	0.474966	1	2	7	1
2081	1920	1971	51	3	29	4	39	10	0.25641	29	876	0.265982	1	3	6	1
2083	1944	1971	27	3	21	5	39	17	0.435897	22	1207	0.280033	1	0	7	1
2085	1949	1971	22	3	16	3	38	17	0.447368	21	1207	0.280033	1	2	7	1
2086	1956	1971	15	3	14	1	10	8	0.8	2	1207	0.280033	1	0	5	0
2088	1916	1967	51	2	21	9	32	11	0.34375	21	938	0.618337	4	3	26	1
2091	1940	1968	28	2	17	1	13	9	0.692308	4	1081	0.60407	2	1	19	1
2092	1939	1971	32	3	18	2	15	12	0.8	3	1081	0.60407	2	1	7	0
2098	1944	1968	24	0	9	2	14	9	0.642857	5	1456	0.448489	1	1	11	1
2099	1946	1968	22	2	19	1	12	0	0	12	1456	0.448489	1	1	10	0
2120	1946	1968	22	2	12	3	26	6	0.230769	20	1081	0.60407	1	1	7	1
2125	1912	1967	55	2	25	10	32	11	0.34375	21	938	0.618337	3	3	19	1
2135	1911	1967	56	2	32	5	22	11	0.5	11	1401	0.384725	1	0	3	1
2148	1927	1955	28	1	18	5	21	6	0.285714	15	777	0.320463	1	0	3	1
2149	1930	1957	27	2	17	4	17	4	0.235294	13	777	0.320463	1	0	1	1
2153	1936	1968	32	2	9	5	22	7	0.318182	15	777	0.320463	3	1	21	1
2157	1941	1968	27	2	16	2	31	4	0.129032	27	997	0.252758	2	0	9	1
2158	1926	1969	43	0	22	4	14	6	0.428571	8	938	0.618337	1	1	9	1
2172	1936	1958	22	1	11	2	8	2	0.25	6	608	0.481908	3	1	14	1
2194	1950	1971	21	3	17	1	33	14	0.424242	19	843	0.367734	1	0	6	0
2211	1910	1945	35	1	29	3	9	0	0	9	347	0.314121	2	1	13	1
2279	1933	1968	44	2	15	3	32	0	0	32	156	0.673077	2	2	8	1
2328	1918	1971	53	3	32	5	49	10	0.204082	39	798	0.334586	2	4	12	1
2426	1942	1971	29	3	10	6	54	19	0.351852	35	1207	0.280033	1	0	9	1
2458	1910	1949	48	3	6	3	13	4	0.307692	9	876	0.265982	1	1	4	0
2460	1938	1971	33	3	20	4	45	25	0.555556	20	522	0.931034	1	0	10	1
2505	1941	1968	27	0	26	1	33	0	0	33	938	0.618337	1	0	7	1
2541	1900	1921	21	3	18	2	7	1	0.142857	6	311	0.5209	1	1	2	0
2543	1921	1965	43	3	16	4	29	9	0.310345	20	798	0.334586	3	4	11	1
2556	1940	1971	31	3	18	6	42	18	0.428571	24	1207	0.280033	1	2	8	1
2620	1919	1956	37	1	26	1	9	2	0.222222	7	830	0.307229	2	0	8	0
2631	1923	1968	45	2	20	9	40	8	0.2	32	1406	0.142959	3	0	10	1
2685	1928	1968	40	2	9	10	32	8	0.25	24	1406	0.142959	2	0	11	1
2699	1937	1968	31	2	8	8	40	8	0.2	32	1406	0.142959	2	4	16	1
2743	1934	1958	24	2	9	5	25	7	0.28	18	1406	0.142959	0	0	0	0
2746	1950	1968	18	2	17	2	26	7	0.269231	19	1420	0.303521	1	0	3	0
2747	1928	1968	40	2	17	8	44	14	0.318182	30	1081	0.60407	1	0	4	1
2783	1933	1971	38	3	34	1	33	25	0.757576	8	520	0.934615	3	3	10	1
2791	1936	1971	35	3	13	2	12	6	0.5	6	739	0.474966	1	1	10	1
2801	1913	1965	52	3	36	2	8	1	0.125	7	501	0.570858	2	1	16	1
2806	1940	1971	29	3	10	5	35	26	0.742857	9	522	0.931034	1	2	9	1
2807	1937	1971	23	3	28	7	48	25	0.520833	23	522	0.931034	2	3	12	1
2809	1950	1971	21	3	17	2	43	25	0.581395	18	522	0.931034	0	0	0	0
2811	1954	1971	17	3	13	1	33	25	0.757576	8	522	0.931034	1	0	6	1
2822	1915	1954	30	1	16	6	28	2	0.0714286	26	148	0.0878378	2	2	3	0
2836	1930	1958	28	1	15	4	11	3	0.272727	8	512	0.503906	5	2	18	1
2844	1911	1948	37	1	10	7	15	4	0.266667	11	561	0.479501	3	2	7	1
2852	1946	1971	25	3	21	1	22	2	0.0909091	20	997	0.252758	2	0	9	1
2866	1935	1958	23	1	12	2	8	3	0.375	5	512	0.503906	0	0	0	0
2872	1916	1958	42	1	23	7	17	4	0.235294	13	561	0.479501	2	2	11	1
2916	1930	1971	41	3	15	6	55	27	0.490909	28	520	0.934615	2	5	15	1
2917	1934	1971	37	3	11	4	50	25	0.5	25	520	0.934615	1	2	6	1
2918	1945	1971	26	3	9	4	38	25	0.657895	13	520	0.934615	1	1	11	0
2919	1953	1971	18	3	14	1	33	25	0.757576	8	520	0.934615	0	0	0	0
2926	1927	1970	43	3	21	4	51	2	0.0392157	49	483	0.233954	1	1	9	1
2936	1934	1957	23	1	13	2	7	1	0.142857	6	848	0.411557	0	0	0	0
3045	1948	1971	26	3	17	2	34	8	0.235294	26	1186	0.24199	1	0	3	1
3084	1939	1971	32	3	26	2	34	8	0.235294	26	771	0.23476	1	1	5	1
3088	1948	1971	23	3	17	6	48	12	0.25	36	776	0.286082	1	1	7	1
3090	1953	1971	16	3	14	2	28	9	0.321429	19	776	0.286082	1	1	7	1
3100	1933	1958	25	1	14	4	9	1	0.111111	8	819	0.283272	1	0	11	1
3200	1954	1971	15	3	13	2	43	25	0.581395	18	520	0.934615	2	1	14	1
3208	1954	1971	17	3	13	1	33	25	0.757576	8	520	0.934615	1	0	7	1
3210	1960	1971	11	3	7	1	33	25	0.757576	8	520	0.934615	1	0	6	1
3501	1950	1968	18	0	17	1	22	2	0.0909091	20	1664	0.160457	0	0	0	0
3696	1904	1971	67	3	12	8	46	12	0.26087	34	876	0.265982	1	1	1	1
3757	1957	1971	14	3	13	1	10	1	0.1	9	1024	0.166016	1	1	8	0
3768	1916	1952	34	1	23	13	17	2	0.117647	15	560	0.0839286	3	0	11	0
3769	1918	1952	31	1	21	12	14	2	0.142857	12	560	0.0839286	4	0	9	1
3793	1926	1967	41	2	21	3	18	0	0	18	187	0.534759	2	0	8	1
3813	1918	1945	27	2	24	3	10	2	0.2	8	148	0.0878378	1	0	1	0
4044	1952	1971	19	3	15	1	33	1	0.030303	32	825	0.107879	2	0	16	0
4401	1951	1971	20	3	19	1	10	1	0.1	9	807	0.143742	1	0	4	1
4437	1914	1948	34	2	31	3	2	0	0	2	751	0.245007	3	0	7	0

## Sheet: KS-Tests Ave r raiders vs Wao U
Raider's Unique identification #	Ego's genetic relatedenss comparing his raid network to the entire Waorani universe	Ego's genetic relatedness to comparing his raid network to his consanguineal universe	A dummy variable that should be used in conjuction with the previous two columns
EgoID	Mean r (reference group: entire Waorani universe)	Mean r (reference group: Consanguineal Kin)	Dummy (0=Kin Universe; 1=Raid Network)
2013	0	0	1
2026	0.0803571	0.0803571	1
2040	0.0741502	0.0741502	1
2046	0.0951087	0.0951087	1
2050	0.0854048	0.0854048	1
2057	0.09375	0.09375	1
2076	0.145833	0.145833	1
2077	0.046875	0.046875	1
2081	0.089527	0.089527	1
2083	0.113598	0.113598	1
2085	0.115017	0.115017	1
2086	0.217188	0.217188	1
2088	0.122596	0.122596	1
2091	0.182692	0.182692	1
2092	0.198958	0.198958	1
2098	0.120536	0.120536	1
2099	0.0454545	0.0454545	1
2120	0.0727163	0.0727163	1
2125	0.09375	0.09375	1
2135	0.133224	0.133224	1
2148	0.0694444	0.0694444	1
2149	0.0714286	0.0714286	1
2153	0.0789474	0.0789474	1
2157	0.0536458	0.0536458	1
2158	0.115385	0.115385	1
2172	0.0703125	0.0703125	1
2194	0.105847	0.105847	1
2211	0	0	1
2279	0	0	1
2328	0.0395833	0.0395833	1
2426	0.0657169	0.0657169	1
2458	0.151786	0.151786	1
2460	0.106105	0.106105	1
2505	0	0	1
2541	0.09375	0.09375	1
2543	0.0690104	0.0690104	1
2556	0.108594	0.108594	1
2620	0.0555556	0.0555556	1
2631	0.0943668	0.0943668	1
2685	0.126674	0.126674	1
2699	0.0943668	0.0943668	1
2743	0.11413	0.11413	1
2746	0.0993089	0.0993089	1
2747	0.0941406	0.0941406	1
2783	0.171371	0.171371	1
4044	0.0766129	0.0766129	1
2791	0.119318	0.119318	1
2801	0.0357143	0.0357143	1
2806	0.145833	0.145833	1
2807	0.0991848	0.0991848	1
2809	0.111281	0.111281	1
2811	0.154234	0.154234	1
2822	0.0217391	0.0217391	1
2836	0.0681818	0.0681818	1
2844	0.0803571	0.0803571	1
2852	0.0333807	0.0333807	1
2866	0.09375	0.09375	1
2872	0.0661765	0.0661765	1
2916	0.119104	0.119104	1
2917	0.109375	0.109375	1
2918	0.1375	0.1375	1
2919	0.155242	0.155242	1
2926	0.0166223	0.0166223	1
2936	0.0714286	0.0714286	1
3045	0.101562	0.101562	1
3084	0.0507813	0.0507813	1
3088	0.0651596	0.0651596	1
3090	0.0691964	0.0691964	1
3100	0.0208333	0.0208333	1
3200	0.134146	0.134146	1
3208	0.181452	0.181452	1
3210	0.181452	0.181452	1
3501	0.0466974	0.0466974	1
3696	0.0754573	0.0754573	1
3757	0.059375	0.059375	1
3768	0.0507813	0.0507813	1
3769	0.0576923	0.0576923	1
3793	0	0	1
3813	0.05	0.05	1
4401	0.084375	0.084375	1
4437	0	0	1
2013	0.0125778	0.162099	0
2026	0.01922	0.0808382	0
2040	0.0439785	0.0893662	0
2046	0.0477535	0.150047	0
2050	0.0434858	0.0883649	0
2057	0.0441925	0.0898009	0
2076	0.0366636	0.119566	0
2077	0.0358856	0.117029	0
2081	0.0250592	0.0689413	0
2083	0.0352393	0.0703619	0
2085	0.0347725	0.0694298	0
2086	0.0343576	0.0686013	0
2088	0.0610996	0.156983	0
2091	0.051368	0.114521	0
2092	0.0499416	0.111341	0
2098	0.0445005	0.073658	0
2099	0.0443449	0.0734005	0
2120	0.049397	0.110127	0
2125	0.0499352	0.128298	0
2135	0.0509822	0.0876996	0
2148	0.0292126	0.0906079	0
2149	0.0272157	0.0844142	0
2153	0.0309761	0.0960777	0
2157	0.0308415	0.0745518	0
2158	0.0494813	0.127132	0
2172	0.0336845	0.133519	0
2194	0.0375778	0.107429	0
2211	0.0226011	0.15697	0
2279	0.0128501	0.198518	0
2328	0.0281566	0.0850344	0
2426	0.033411	0.0667113	0
2458	0.0230234	0.0633406	0
2460	0.0465443	0.214889	0
2505	0.0418893	0.107626	0
2541	0.0167839	0.130062	0
2543	0.0285067	0.0860917	0
2556	0.0352912	0.0704654	0
2620	0.0265041	0.0769578	0
2631	0.0405245	0.0694623	0
2685	0.0427807	0.0733297	0
2699	0.0437143	0.07493	0
2743	0.0384758	0.0659506	0
2746	0.0448246	0.0760756	0
2747	0.0492155	0.109722	0
2783	0.0490534	0.227344	0
4044	0.0290651	0.0849053	0
2791	0.0371304	0.121088	0
2801	0.0439315	0.211327	0
2806	0.0452217	0.208782	0
2807	0.0470371	0.217164	0
2809	0.043147	0.199204	0
2811	0.0463109	0.213811	0
2822	0.00784492	0.127745	0
2836	0.0318141	0.14975	0
2844	0.0287409	0.123468	0
2852	0.0306633	0.0741208	0
2866	0.024423	0.11496	0
2872	0.0296875	0.127535	0
2916	0.0453773	0.210306	0
2917	0.0409946	0.189994	0
2918	0.0410464	0.190234	0
2919	0.0396979	0.183984	0
2926	0.0197355	0.0984731	0
2936	0.0319016	0.0906637	0
3045	0.0427078	0.086784	0
3084	0.0246288	0.076985	0
3088	0.0280521	0.0871204	0
3090	0.0272222	0.0845431	0
3100	0.0304736	0.089672	0
3200	0.0484083	0.224354	0
3208	0.0476173	0.220688	0
3210	0.0475136	0.220207	0
3501	0.0394321	0.0571101	0
3696	0.0218564	0.0601299	0
3757	0.0256577	0.0603857	0
3768	0.0127691	0.0549526	0
3769	0.0126653	0.0545061	0
3793	0.0124741	0.160762	0
3813	0.00486255	0.0791807	0
4401	0.0181175	0.0541054	0
4437	0.0273989	0.0879244	0

## Sheet: Raider Spouse Marriage
Raider's Unique identification #	Ego's total number of spouses	The number of times ego raided	Ego's spouses ID #	The Year Ego and his spouse were married	A binary dummy variable that asks the question: Did Ego raid with his spouse's father, brother, or half brother (0=No; 1=Yes)	The year in which Ego first raided with his spouse's father, brother, or half-brother	A dummy variable that examines the temporal ordering of Raids and Marriages	the number of years elapsed between Raid and Marriage for ego's who raided with a partner then married their partner's female kin	A binary dummy variable that asks the question: Was this marriage incestuous? (0=No; 1=Yes)	The number of times ego raided with his partner prior to marrying his partner's kin	Genetic relatedness between Ego and his spouse
Ego ID	Count Ego's Mates	Times Raided	Spouse ID	Year of Marriage	Raided w/ Spouses' Father/Brother/Half Brother (0=No; 1=Yes)	Year Ego 1st Raided w/ Spouse's Father/Brother/Half Brother	Raid-Marriage Order (0=Marriage, Raid; 1=Raid-Marriage Coterminus; 2= Raid, Marriage)	Years Between Raid-Marriage	Incest Marriage (0=No; 1=Yes)	# of Times Ego Raided Before Married Partners' Kin	r
2040	1	9	2039	1961	1	1958	2	3	0	1	0.15625
2085	1	3	3756	1967	1	1965	2	2	0	1	0.0546875
2098	1	2	2989	1962	1	1953	2	9	0	1	0.03125
2120	1	3	2296	1970	1	1958	2	12	0	2	0.09375
2135	1	5	2097	1943	1	1941	2	2	0	1	0
2148	1	5	3013	1948	1	1947	2	1	0	2	0
2149	1	4	3904	1954	1	1947	2	7	0	3	0
2158	1	4	2163	1949	1	1948	2	1	0	1	0
2747	1	8	2748	1949	1	1945	2	4	0	3	0.09375
2811	1	1	3652	1977	1	1967	2	10	0	1	0.1875
3045	1	2	3075	1967	1	1965	2	2	0	2	0.125
3100	1	4	2670	1948	1	1947	2	1	0	1	0
3208	1	1	2939	1971	1	1967	2	4	0	1	0.4375
3210	1	1	3671	1983	1	1967	2	16	0	1	0.15625
3696	1	8	2459	1952	1	1949	2	3	0	1	0
2013	2	2	2024	1951	1	1949	2	2	0	1	0
2157	2	2	2276	1961	1	1957	2	4	0	1	0.125
2279	2	3	2384	1951	1	1948	2	3	0	1	0
2279	2	3	3583	1949	1	1948	2	1	0	1	0
2328	2	5	2548	1951	1	1937	2	14	0	1	0
2685	2	10	2686	1955	1	1943	2	12	0	3	0
2685	2	10	2835	1947	1	1937	2	10	0	4	0.09375
2699	2	8	2697	1951	1	1947	2	4	0	3	0.09375
2699	2	8	2698	1958	1	1947	2	11	0	4	0.03125
2807	2	7	3203	1989	1	1967	2	22	0	3	0.3125
2852	2	1	2058	1974	1	1967	2	7	0	1	0
2872	2	7	2622	1951	1	1949	2	2	0	1	0
3200	2	4	3667	1969	1	1967	2	2	0	2	0.15625
3200	2	4	3670	1976	1	1967	2	9	0	2	0.15625
3793	2	3	3905	1949	1	1947	2	2	0	1	0
2046	3	8	2061	1959	1	1937	2	22	0	2	0
2046	3	8	2045	1938	1	1937	2	1	0	1	0
2046	3	8	2054	1943	1	1937	2	6	0	1	0
2153	3	5	2059	1972	1	1958	2	14	0	1	0.125
2153	3	5	2494	1973	1	1958	2	15	0	1	0
2153	3	5	2932	1954	1	1947	2	7	0	2	0
2172	3	2	2621	1960	1	1956	2	4	0	1	0
2543	3	4	4397	1950	1	1937	2	13	0	1	0
2631	3	9	2632	1956	1	1941	2	15	0	6	0.09375
2631	3	9	3904	1962	1	1941	2	21	0	6	0.03125
2088	4	9	2089	1938	1	1937	2	1	0	1	0
2088	4	9	2097	1950	1	1937	2	13	0	6	0
3769	4	12	2845	1941	1	1939	2	2	0	1	0.125
2836	5	4	2212	1948	1	1945	2	3	0	1	0
2836	5	4	2848	1951	1	1945	2	6	0	2	0
2328	2	5	2329	1944	1	1937	2	7	0	1	0.09375
2026	1	4	2037	1956	1	1956	1	0	0		0
4401	1	1	3087	1970	1	1970	1	0	0		0.15625
2157	2	2	2268	1957	1	1957	1	0	0		0.125
2050	1	4	3086	1962	1	1969	0		0		0.125
2077	1	2	2808	1957	1	1965	0		0		0
2081	1	4	2134	1939	1	1949	0		0		0
2083	1	5	2056	1961	1	1965	0		0		0.15625
2426	1	6	2427	1962	1	1967	0		0		0.03125
2460	1	4	2461	1950	1	1967	0		0		0
2505	1	1	2504	1958	1	1967	0		0		0
2556	1	6	2555	1963	1	1965	0		0		0.117188
2791	1	2	2792	1953	1	1959	0		0		0
2806	1	5	2929	1952	1	1968	0		0		0.125
2926	1	4	3650	1946	1	1967	0		0		0
3084	1	2	3091	1964	1	1967	0		0		0
3088	1	6	2789	1963	1	1967	0		0		0
3090	1	2	4400	1967	1	1970	0		0		0.15625
2013	2	3	2213	1955	1	1956	0		0		0
2091	2	1	3821	1950	1	1957	0		0		0.09375
2211	2	3	2212	1926	1	1939	0		0		0
2211	2	3	2861	1931	1	1939	0		0		0
2807	2	7	2078	1955	1	1965	0		0		0
2852	2	1	2851	1962	1	1967	0		0		0.09375
2872	2	7	2877	1941	1	1945	0		0		0
2125	3	10	2126	1931	1	1953	0		0		0
2125	3	10	3899	1928	1	1953	0		0		0
2172	3	2	3151	1952	1	1956	0		0		0
2844	3	7	2839	1935	1	1945	0		0		0
2088	4	9	2087	1924	1	1937	0		0		0
2057	1	3	2793	1968	0				0		0.125
2086	1	1	2101	1977	0				0		0
2099	1	1	3010	1969	0				0		0.0625
2194	1	1	2195	1967	0				0		0.09375
2458	1	3	2459	1941	0				0		0
2541	1	2	2542	1917	0				0		0
2746	1	2	2635	1973	0				0		0.148438
2918	1	4	2931	1969	0				0		0
3757	1	1	2493	1969	0				0		0.0546875
3813	1	3	4338	1929	0				0		0
2076	2	1	2816	1955	0				0		0
2076	2	1	3570	1954	0				0		0
2091	2	1	2258	1954	0				0		0
2092	2	2	2152	1957	0				0		0
2092	2	2	3818	1963	0				0		0
2620	2	1	2621	1937	0				0		0
2620	2	1	2622	1945	0				0		0
2822	2	6	2823	1937	0				0		0
2822	2	6	3140	1930	0				0		0
3793	2	3	2823	1951	0				0		0
2125	3	10	3912	1946	0				0		0
2172	3	2	2174	1957	0				0		0
2543	3	4	2789	1959	0				0		0
2543	3	4	2925	1946	0				0		0
2631	3	9	3222	1953	0				0		0
2783	3	1	2782	1944	0				0		0
2783	3	1	2882	1954	0				0		0
2844	3	7	3098	1947	0				0		0
2844	3	7	3151	1943	0				0		0
3768	3	13	4294	1936	0				0		0
3768	3	13	4295	1929	0				0		0
3768	3	13	4296	1938	0				0		0
4437	3	3	4438	1938	0				0		0
4437	3	3	4527	1929	0				0		0
4437	3	3	5115	1934	0				0		0
2088	4	9	2106	1954	0				0		0
3769	4	12	3222	1940	0				0		0
3769	4	12	4281	1942	0				0		0
3769	4	12	4287	1941	0				0		0
2836	5	4	3005	1953	0				0		0
2836	5	4	3013	1955	0				0		0
2836	5	4	3098	1948	0				0		0
2801	2	2	2788	1937	0				0		0
4044	2	1	4047	1969	0				0		0.125
4044	2	1	4055	1971	0				0		0.125
2917	1	4	2805	1958					1		0.375
2801	2	2	2802	1937					1		0.25
2916	2	6	2803	1949					1		0.375
2916	2	6	2805	1953					1		0.375
2783	3	1	2814	1950					1		0.375
2743	0	5
2809	0	2
2866	0	2
2919	0	1
2936	0	2
3501	0	1

## Sheet: Raid Dyad Data
The unique ID given to any pair of raiders who raided together	The Unique ID number given to one male of the pair of raiders	The Unique ID number given to the other male of the pair of raiders	The number of times this particular dyad raided together	The raiding dyads genetic relatedness	A binary dummy variable that asks the question: Does this dyad contain sufficient genealogic information to retain them for analyses (0=No; 1=Yes)	The territorial affiliation of Ego 1	The territorial affiliation of Ego 2	A Binary dummy variable that asks the question: Is this dyad from the same territorial group (0=No; 1=Yes)	The year in which Ego 1 was born	The year in which Ego 2 was born	The absolute age difference between Ego 1 and Ego 2	The patrilineage to which ego 1 belonged	The patrilineage to which Ego 2 belonged	A binary dumy variable that asks the question: Is this dyad from the same patrilineage (0=No; 1=Yes)	The matrilineage to which ego 1 belonged	The matrilineage to which Ego 2 belonged	A binary dumy variable that asks the question: Is this dyad from the same matrilineage (0=No; 1=Yes)	A binary dummy variable that asks the question: Did ego 1 marry the daughter, sister, or half-sister of Ego 2 (0=No; 1=Yes)	A binary dummy variable that asks the question: Did Ego 1 and Ego 2 marry their respective children to one another (0=No; 1=Yes)	The number of children Ego 1 and Ego 2 married off to one another	A binary variable that asks the question: Are Ego 1 and Ego 2 Affinal Kin Members (0=No; 1=Yes)
DyadID	Ego1 ID	Ego2 ID	Times Dyad Killed Together	r	Control Variable: Genealogic Depth Sufficient (0=No; 1=Yes)	Ego1 Territorial Group ID	Ego2 Territorial Group ID	Dyad From Same Territorial Group (0=No; 1=Yes)	Ego1 YOB	Ego2 YOB	Absolute Age Difference	Ego1 Patrilineage ID	Ego2 Patrilineage ID	Dyad from Same Patriline (0=No; 1=Yes)	Ego1 Matrilineage ID	Ego2 Matrilineage ID	Dyad From Same Matriline (0=No; 1=Yes)	Ego1 Married to Daughter/Sister of Ego 2	Dyad arranged child marriage	# of child marriages arranged	Dyad are Affinal Kin
1	2040	4401	1	0.03125	1	W	W	1	1939	1951	12	3586	4161	0	3956	4395	0	0	0	0	0
1	4401	2040	1	0.03125	1	W	W	1	1951	1939	12	4161	3586	0	4395	3956	0	0	0	0	0
2	2050	4401	1	0.03125	1	W	W	1	1948	1951	3	3586	4161	0	3956	4395	0	0	0	0	0
2	4401	2050	1	0.03125	1	W	W	1	1951	1948	3	4161	3586	0	4395	3956	0	0	0	0	0
3	2083	4401	1	0.0546875	1	W	W	1	1944	1951	7	3953	4161	0	3178	4395	0	0	0	0	0
3	4401	2083	1	0.0546875	1	W	W	1	1951	1944	7	4161	3953	0	4395	3178	0	0	0	0	0
4	2085	4401	1	0.0546875	1	W	W	1	1949	1951	2	3953	4161	0	3178	4395	0	1	0	0	1
4	4401	2085	1	0.0546875	1	W	W	1	1951	1949	2	4161	3953	0	4395	3178	0	0	0	0	1
5	2086	4401	1	0.0546875	1	W	W	1	1956	1951	5	3953	4161	0	3178	4395	0	0	0	0	0
5	4401	2086	1	0.0546875	1	W	W	1	1951	1956	5	4161	3953	0	4395	3178	0	0	0	0	0
7	2040	4044	1	0	1	W	W	1	1939	1952	13	3586	2819	0	3956	2815	0	0	0	0	0
7	4044	2040	1	0	1	W	W	1	1952	1939	13	2819	3586	0	2815	3956	0	0	0	0	0
8	2046	4044	1	0	1	W	W	1	1927	1952	25	3586	2819	0	3178	2815	0	0	0	0	0
8	4044	2046	1	0	1	W	W	1	1952	1927	25	2819	3586	0	2815	3178	0	0	0	0	0
9	2050	4044	1	0	1	W	W	1	1948	1952	4	3586	2819	0	3956	2815	0	0	0	0	0
9	4044	2050	1	0	1	W	W	1	1952	1948	4	2819	3586	0	2815	3956	0	0	0	0	0
10	2057	4044	1	0	1	W	W	1	1951	1952	1	3586	2819	0	3956	2815	0	0	0	0	0
10	4044	2057	1	0	1	W	W	1	1952	1951	1	2819	3586	0	2815	3956	0	0	0	0	0
11	2077	4044	1	0	1	W	W	1	1945	1952	7	3953	2819	0	3956	2815	0	0	0	0	0
11	4044	2077	1	0	1	W	W	1	1952	1945	7	2819	3953	0	2815	3956	0	0	0	0	0
12	2081	4044	1	0	1	W	W	1	1920	1952	32	3953	2819	0	4176	2815	0	0	0	0	0
12	4044	2081	1	0	1	W	W	1	1952	1920	32	2819	3953	0	2815	4176	0	0	0	0	0
13	2083	4044	1	0	1	W	W	1	1944	1952	8	3953	2819	0	3178	2815	0	0	0	0	0
13	4044	2083	1	0	1	W	W	1	1952	1944	8	2819	3953	0	2815	3178	0	0	0	0	0
14	2085	4044	1	0	1	W	W	1	1949	1952	3	3953	2819	0	3178	2815	0	0	0	0	0
14	4044	2085	1	0	1	W	W	1	1952	1949	3	2819	3953	0	2815	3178	0	0	0	0	0
15	2194	4044	1	0.1875	1	W	W	1	1950	1952	2	4478	2819	0	4274	2815	0	0	0	0	0
15	4044	2194	1	0.1875	1	W	W	1	1952	1950	2	2819	4478	0	2815	4274	0	0	0	0	0
16	2556	4401	1	0.0546875	1	W	W	1	1940	1951	11	3953	4161	0	3178	4395	0	0	0	0	0
16	4401	2556	1	0.0546875	1	W	W	1	1951	1940	11	4161	3953	0	4395	3178	0	0	0	0	0
17	2040	3793	1	0	1	W	P	0	1939	1926	13	3586	2006	0	3956	4280	0	0	0	0	0
17	3793	2040	1	0	1	P	W	0	1926	1939	13	2006	3586	0	4280	3956	0	0	0	0	0
18	2040	3757	1	0.03125	1	W	W	1	1939	1957	18	3586	4161	0	3956	4274	0	0	0	0	0
18	3757	2040	1	0.03125	1	W	W	1	1957	1939	18	4161	3586	0	4274	3956	0	0	0	0	0
19	2328	4044	1	0	1	W	W	1	1918	1952	34	4161	2819	0	3178	2815	0	0	0	0	0
19	4044	2328	1	0	1	W	W	1	1952	1918	34	2819	4161	0	2815	3178	0	0	0	0	0
20	2050	3757	1	0.03125	1	W	W	1	1948	1957	9	3586	4161	0	3956	4274	0	0	0	0	0
20	3757	2050	1	0.03125	1	W	W	1	1957	1948	9	4161	3586	0	4274	3956	0	0	0	0	0
21	2088	3793	1	0	1	P	P	1	1916	1926	10	2312	2006	0	2123	4280	0	0	0	0	0
21	3793	2088	1	0	1	P	P	1	1926	1916	10	2006	2312	0	4280	2123	0	0	0	0	0
22	2091	3793	1	0	1	P	P	1	1940	1926	14	2312	2006	0	3564	4280	0	0	0	0	0
22	3793	2091	1	0	1	P	P	1	1926	1940	14	2006	2312	0	4280	3564	0	0	0	0	0
23	2092	3793	1	0	1	W	P	0	1939	1926	13	2312	2006	0	3564	4280	0	0	0	0	0
23	3793	2092	1	0	1	P	W	0	1926	1939	13	2006	2312	0	4280	3564	0	0	0	0	0
24	2098	3793	1	0	1	B	P	0	1944	1926	18	2312	2006	0	3564	4280	0	0	0	0	0
24	3793	2098	1	0	1	P	B	0	1926	1944	18	2006	2312	0	4280	3564	0	0	0	0	0
25	2083	3757	1	0.0546875	1	W	W	1	1944	1957	13	3953	4161	0	3178	4274	0	0	0	0	0
25	3757	2083	1	0.0546875	1	W	W	1	1957	1944	13	4161	3953	0	4274	3178	0	0	0	0	0
26	2085	3757	1	0.0546875	1	W	W	1	1949	1957	8	3953	4161	0	3178	4274	0	0	1	1	1
26	3757	2085	1	0.0546875	1	W	W	1	1957	1949	8	4161	3953	0	4274	3178	0	0	1	1	1
27	2086	3757	1	0.0546875	1	W	W	1	1956	1957	1	3953	4161	0	3178	4274	0	0	0	0	0
27	3757	2086	1	0.0546875	1	W	W	1	1957	1956	1	4161	3953	0	4274	3178	0	0	0	0	0
29	2125	3793	2	0	1	P	P	1	1912	1926	14	2312	2006	0	2123	4280	0	0	0	0	1
29	3793	2125	2	0	1	P	P	0	1926	1912	14	2006	2312	0	4280	2123	0	1	0	0	1
30	2135	3793	1	0	1	P	P	1	1911	1926	15	2312	2006	0	3178	4280	0	0	0	0	0
30	3793	2135	1	0	1	P	P	1	1926	1911	15	2006	2312	0	4280	3178	0	0	0	0	0
31	2040	3696	2	0.0625	1	W	W	1	1939	1904	35	3586	3953	0	3956	4176	0	0	0	0	0
31	3696	2040	2	0.0625	1	W	W	1	1904	1939	35	3953	3586	0	4176	3956	0	0	0	0	0
32	2046	3696	4	0	1	W	W	1	1927	1904	23	3586	3953	0	3178	4176	0	0	0	0	1
32	3696	2046	4	0	1	W	W	1	1904	1927	23	3953	3586	0	4176	3178	0	1	0	0	1
33	2050	3696	1	0.0625	1	W	W	1	1948	1904	44	3586	3953	0	3956	4176	0	0	0	0	0
33	3696	2050	1	0.0625	1	W	W	1	1904	1948	44	3953	3586	0	4176	3956	0	0	0	0	0
34	2149	3793	2	0	1	P	P	1	1930	1926	4	2145	2006	0	3178	4280	0	0	0	0	0
34	3793	2149	2	0	1	P	P	1	1926	1930	4	2006	2145	0	4280	3178	0	0	0	0	0
35	2057	3696	1	0.0625	1	W	W	1	1951	1904	47	3586	3953	0	3956	4176	0	0	0	0	0
35	3696	2057	1	0.0625	1	W	W	1	1904	1951	47	3953	3586	0	4176	3956	0	0	0	0	0
36	2157	3793	1	0	1	P	P	1	1941	1926	15	3022	2006	0	2123	4280	0	0	0	0	0
36	3793	2157	1	0	1	P	P	1	1926	1941	15	2006	3022	0	4280	2123	0	0	0	0	0
37	2070	3696	2	0.25	1	W	W	1	1900	1904	4	3953	3953	1	3954	4176	0	0	0	0	0
37	3696	2070	2	0.25	1	W	W	1	1904	1900	4	3953	3953	1	4176	3954	0	0	0	0	0
38	2148	3769	1	0	1	G	G	1	1927	1916	11	2145	5142	0	3178	3766	0	0	0	0	0
38	3769	2148	1	0	1	G	G	1	1916	1927	11	5142	2145	0	3766	3178	0	0	0	0	0
39	2076	3696	1	0.125	1	W	W	1	1936	1904	32	3953	3953	1	3956	4176	0	0	0	0	0
39	3696	2076	1	0.125	1	W	W	1	1904	1936	32	3953	3953	1	4176	3956	0	0	0	0	0
40	2148	3768	1	0	1	G	G	1	1927	1913	14	2145	5142	0	3178	3766	0	0	0	0	0
40	3768	2148	1	0	1	G	G	1	1913	1927	14	5142	2145	0	3766	3178	0	0	0	0	0
41	2077	3696	1	0.125	1	W	W	1	1945	1904	41	3953	3953	1	3956	4176	0	0	0	0	0
41	3696	2077	1	0.125	1	W	W	1	1904	1945	41	3953	3953	1	4176	3956	0	0	0	0	0
42	2426	4044	1	0	1	W	W	1	1942	1952	10	3953	2819	0	3178	2815	0	0	0	0	0
42	4044	2426	1	0	1	W	W	1	1952	1942	10	2819	3953	0	2815	3178	0	0	0	0	0
43	2081	3696	3	0.5	1	W	W	1	1920	1904	16	3953	3953	1	4176	4176	1	0	0	0	0
43	3696	2081	3	0.5	1	W	W	1	1904	1920	16	3953	3953	1	4176	4176	1	0	0	0	0
44	2083	3696	1	0.25	1	W	W	1	1944	1904	40	3953	3953	1	3178	4176	0	0	0	0	0
44	3696	2083	1	0.25	1	W	W	1	1904	1944	40	3953	3953	1	4176	3178	0	0	0	0	0
45	2085	3696	1	0.25	1	W	W	1	1949	1904	45	3953	3953	1	3178	4176	0	0	0	0	0
45	3696	2085	1	0.25	1	W	W	1	1904	1949	45	3953	3953	1	4176	3178	0	0	0	0	0
46	2088	3696	2	0	1	P	W	0	1916	1904	12	2312	3953	0	2123	4176	0	0	0	0	0
46	3696	2088	2	0	1	W	P	0	1904	1916	12	3953	2312	0	4176	2123	0	0	0	0	0
47	2211	3813	2	0	1	G	P	0	1910	1918	8	4271	3814	0	3727	5156	0	0	0	0	0
47	3813	2211	2	0	1	P	G	0	1918	1910	8	3814	4271	0	5156	3727	0	0	0	0	0
48	2172	3768	1	0.0625	1	G	G	1	1936	1913	23	4271	5142	0	5143	3766	0	0	0	0	0
48	3768	2172	1	0.0625	1	G	G	1	1913	1936	23	5142	4271	0	3766	5143	0	0	0	0	0
49	2807	4401	1	0	1	W	W	1	1948	1951	3	4478	4161	0	2818	4395	0	0	0	0	0
49	4401	2807	1	0	1	W	W	1	1951	1948	3	4161	4478	0	4395	2818	0	0	0	0	0
50	2460	4044	1	0.125	1	W	W	1	1938	1952	14	4478	2819	0	2818	2815	0	0	0	0	0
50	4044	2460	1	0.125	1	W	W	1	1952	1938	14	2819	4478	0	2815	2818	0	0	0	0	0
51	2125	3696	2	0	1	P	W	0	1912	1904	8	2312	3953	0	2123	4176	0	0	0	0	0
51	3696	2125	2	0	1	W	P	0	1904	1912	8	3953	2312	0	4176	2123	0	0	0	0	0
52	2211	3769	3	0	1	G	G	1	1910	1916	6	4271	5142	0	3727	3766	0	0	0	0	0
52	3769	2211	3	0	1	G	G	1	1916	1910	6	5142	4271	0	3766	3727	0	0	0	0	0
53	2211	3768	3	0	1	G	G	1	1910	1913	3	4271	5142	0	3727	3766	0	0	0	0	0
53	3768	2211	3	0	1	G	G	1	1913	1910	3	5142	4271	0	3766	3727	0	0	0	0	0
54	2146	3696	2	0	0	P	W	0	1912	1904	8	2145	3953	0	2144	4176	0	0	0	0	0
54	3696	2146	2	0	0	W	P	0	1904	1912	8	3953	2145	0	4176	2144	0	0	0	0	0
55	2159	3696	2	0	0	B	W	0	1892	1904	12	2312	3953	0	2313	4176	0	0	0	0	0
55	3696	2159	2	0	0	W	B	0	1904	1892	12	3953	2312	0	4176	2313	0	0	0	0	0
56	2194	3696	1	0	1	W	W	1	1950	1904	46	4478	3953	0	4274	4176	0	0	0	0	0
56	3696	2194	1	0	1	W	W	1	1904	1950	46	3953	4478	0	4176	4274	0	0	0	0	0
57	2556	4044	1	0	1	W	W	1	1940	1952	12	3953	2819	0	3178	2815	0	0	0	0	0
57	4044	2556	1	0	1	W	W	1	1952	1940	12	2819	3953	0	2815	3178	0	0	0	0	0
58	2328	3696	2	0.09375	1	W	W	1	1918	1904	14	4161	3953	0	3178	4176	0	1	1	1	1
58	3696	2328	2	0.09375	1	W	W	1	1904	1918	14	3953	4161	0	4176	3178	0	0	1	1	1
59	3088	4401	1	0.15625	1	W	W	1	1948	1951	3	4394	4161	0	3178	4395	0	0	0	0	1
59	4401	3088	1	0.15625	1	W	W	1	1951	1948	3	4161	4394	0	4395	3178	0	1	0	0	1
60	3090	4401	1	0.15625	1	W	W	1	1955	1951	4	4394	4161	0	3178	4395	0	1	0	0	1
60	4401	3090	1	0.15625	1	W	W	1	1951	1955	4	4161	4394	0	4395	3178	0	1	0	0	1
61	2737	4044	1	0	0	P	W	0	1905	1952	47	3563	2819	0	4143	2815	0	0	0	0	0
61	4044	2737	1	0	0	W	P	0	1952	1905	47	2819	3563	0	2815	4143	0	0	0	0	0
62	2426	3696	2	0.25	1	W	W	1	1942	1904	38	3953	3953	1	3178	4176	0	0	0	0	0
62	3696	2426	2	0.25	1	W	W	1	1904	1942	38	3953	3953	1	4176	3178	0	0	0	0	0
63	2783	4044	1	0.125	1	W	W	1	1933	1952	19	4478	2819	0	2818	2815	0	0	0	0	0
63	4044	2783	1	0.125	1	W	W	1	1952	1933	19	2819	4478	0	2815	2818	0	0	0	0	0
64	2458	3696	2	0.5	1	W	W	1	1901	1904	3	3953	3953	1	4176	4176	1	0	0	0	0
64	3696	2458	2	0.5	1	W	W	1	1904	1901	3	3953	3953	1	4176	4176	1	0	0	0	0
65	2806	4044	1	0.125	1	W	W	1	1942	1952	10	4478	2819	0	2818	2815	0	0	0	0	0
65	4044	2806	1	0.125	1	W	W	1	1952	1942	10	2819	4478	0	2815	2818	0	0	0	0	0
66	2807	4044	1	0.125	1	W	W	1	1948	1952	4	4478	2819	0	2818	2815	0	0	0	0	0
66	4044	2807	1	0.125	1	W	W	1	1952	1948	4	2819	4478	0	2815	2818	0	0	0	0	0
67	2460	3696	1	0	1	W	W	1	1938	1904	34	4478	3953	0	2818	4176	0	0	0	0	0
67	3696	2460	1	0	1	W	W	1	1904	1938	34	3953	4478	0	4176	2818	0	0	0	0	0
68	2809	4044	1	0.125	1	W	W	1	1950	1952	2	4478	2819	0	2818	2815	0	0	0	0	0
68	4044	2809	1	0.125	1	W	W	1	1952	1950	2	2819	4478	0	2815	2818	0	0	0	0	0
69	2811	4044	1	0.1875	1	W	W	1	1954	1952	2	4478	2819	0	2818	2815	0	1	0	0	1
69	4044	2811	1	0.1875	1	W	W	1	1952	1954	2	2819	4478	0	2815	2818	0	0	0	0	1
70	2556	3757	1	0.0546875	1	W	W	1	1940	1957	17	3953	4161	0	3178	4274	0	0	0	0	0
70	3757	2556	1	0.0546875	1	W	W	1	1957	1940	17	4161	3953	0	4274	3178	0	0	0	0	0
71	2620	3813	1	0	1	G	P	0	1919	1918	1	3566	3814	0	5143	5156	0	0	0	0	0
71	3813	2620	1	0	1	P	G	0	1918	1919	1	3814	3566	0	5156	5143	0	0	0	0	0
76	2040	3210	1	0	1	W	W	1	1939	1960	21	3586	4478	0	3956	2818	0	0	0	0	0
76	3210	2040	1	0	1	W	W	1	1960	1939	21	4478	3586	0	2818	3956	0	0	0	0	0
77	2040	3208	1	0	1	W	W	1	1939	1954	15	3586	4478	0	3956	2818	0	0	0	0	0
77	3208	2040	1	0	1	W	W	1	1954	1939	15	4478	3586	0	2818	3956	0	0	0	0	0
78	2046	3210	1	0	1	W	W	1	1927	1960	33	3586	4478	0	3178	2818	0	0	0	0	0
78	3210	2046	1	0	1	W	W	1	1960	1927	33	4478	3586	0	2818	3178	0	0	0	0	0
79	2046	3208	1	0	1	W	W	1	1927	1954	27	3586	4478	0	3178	2818	0	0	0	0	0
79	3208	2046	1	0	1	W	W	1	1954	1927	27	4478	3586	0	2818	3178	0	0	0	0	0
80	2631	3793	1	0	1	P	P	1	1923	1926	3	3563	2006	0	3954	4280	0	0	0	0	0
80	3793	2631	1	0	1	P	P	1	1926	1923	3	2006	3563	0	4280	3954	0	0	0	0	0
81	2040	3200	2	0	1	W	W	1	1939	1956	17	3586	4478	0	3956	2818	0	0	0	0	0
81	3200	2040	2	0	1	W	W	1	1956	1939	17	4478	3586	0	2818	3956	0	0	0	0	0
82	2050	3210	1	0	1	W	W	1	1948	1960	12	3586	4478	0	3956	2818	0	0	0	0	0
82	3210	2050	1	0	1	W	W	1	1960	1948	12	4478	3586	0	2818	3956	0	0	0	0	0
83	2050	3208	1	0	1	W	W	1	1948	1954	6	3586	4478	0	3956	2818	0	0	0	0	0
83	3208	2050	1	0	1	W	W	1	1954	1948	6	4478	3586	0	2818	3956	0	0	0	0	0
84	2046	3200	2	0	1	W	W	1	1927	1956	29	3586	4478	0	3178	2818	0	0	0	0	0
84	3200	2046	2	0	1	W	W	1	1956	1927	29	4478	3586	0	2818	3178	0	0	0	0	0
85	2057	3210	1	0	1	W	W	1	1951	1960	9	3586	4478	0	3956	2818	0	0	0	0	0
85	3210	2057	1	0	1	W	W	1	1960	1951	9	4478	3586	0	2818	3956	0	0	0	0	0
86	2543	3696	3	0.09375	1	W	W	1	1921	1904	17	4161	3953	0	3178	4176	0	0	0	0	0
86	3696	2543	3	0.09375	1	W	W	1	1904	1921	17	3953	4161	0	4176	3178	0	0	0	0	0
87	2057	3208	1	0	1	W	W	1	1951	1954	3	3586	4478	0	3956	2818	0	0	0	0	0
87	3208	2057	1	0	1	W	W	1	1954	1951	3	4478	3586	0	2818	3956	0	0	0	0	0
88	2050	3200	2	0	1	W	W	1	1948	1956	8	3586	4478	0	3956	2818	0	0	0	0	0
88	3200	2050	2	0	1	W	W	1	1956	1948	8	4478	3586	0	2818	3956	0	0	0	0	0
89	2620	3769	1	0.125	1	G	G	1	1919	1916	3	3566	5142	0	5143	3766	0	0	0	0	0
89	3769	2620	1	0.125	1	G	G	1	1916	1919	3	5142	3566	0	3766	5143	0	0	0	0	0
90	2620	3768	1	0.125	1	G	G	1	1919	1913	6	3566	5142	0	5143	3766	0	0	0	0	0
90	3768	2620	1	0.125	1	G	G	1	1913	1919	6	5142	3566	0	3766	5143	0	0	0	0	0
91	2057	3200	1	0	1	W	W	1	1951	1956	5	3586	4478	0	3956	2818	0	0	0	0	0
91	3200	2057	1	0	1	W	W	1	1956	1951	5	4478	3586	0	2818	3956	0	0	0	0	0
92	2556	3696	1	0.25	1	W	W	1	1940	1904	36	3953	3953	1	3178	4176	0	0	0	0	0
92	3696	2556	1	0.25	1	W	W	1	1904	1940	36	3953	3953	1	4176	3178	0	0	0	0	0
93	2077	3210	1	0	1	W	W	1	1945	1960	15	3953	4478	0	3956	2818	0	0	0	0	0
93	3210	2077	1	0	1	W	W	1	1960	1945	15	4478	3953	0	2818	3956	0	0	0	0	0
94	2077	3208	1	0	1	W	W	1	1945	1954	9	3953	4478	0	3956	2818	0	0	0	0	0
94	3208	2077	1	0	1	W	W	1	1954	1945	9	4478	3953	0	2818	3956	0	0	0	0	0
95	2081	3210	1	0	1	W	W	1	1920	1960	40	3953	4478	0	4176	2818	0	0	0	0	0
95	3210	2081	1	0	1	W	W	1	1960	1920	40	4478	3953	0	2818	4176	0	0	0	0	0
96	2916	4044	1	0.125	1	W	W	1	1930	1952	22	4478	2819	0	2818	2815	0	0	0	0	0
96	4044	2916	1	0.125	1	W	W	1	1952	1930	22	2819	4478	0	2815	2818	0	0	0	0	0
97	2081	3208	1	0	1	W	W	1	1920	1954	34	3953	4478	0	4176	2818	0	0	0	0	0
97	3208	2081	1	0	1	W	W	1	1954	1920	34	4478	3953	0	2818	4176	0	0	0	0	0
98	2083	3210	1	0	1	W	W	1	1944	1960	16	3953	4478	0	3178	2818	0	0	0	0	0
98	3210	2083	1	0	1	W	W	1	1960	1944	16	4478	3953	0	2818	3178	0	0	0	0	0
99	2917	4044	1	0.125	1	W	W	1	1934	1952	18	4478	2819	0	2818	2815	0	0	0	0	0
99	4044	2917	1	0.125	1	W	W	1	1952	1934	18	2819	4478	0	2815	2818	0	0	0	0	0
100	2918	4044	1	0.125	1	W	W	1	1945	1952	7	4478	2819	0	2818	2815	0	0	0	0	0
100	4044	2918	1	0.125	1	W	W	1	1952	1945	7	2819	4478	0	2815	2818	0	0	0	0	0
101	2083	3208	1	0	1	W	W	1	1944	1954	10	3953	4478	0	3178	2818	0	0	0	0	0
101	3208	2083	1	0	1	W	W	1	1954	1944	10	4478	3953	0	2818	3178	0	0	0	0	0
102	2085	3210	1	0	1	W	W	1	1949	1960	11	3953	4478	0	3178	2818	0	0	0	0	0
102	3210	2085	1	0	1	W	W	1	1960	1949	11	4478	3953	0	2818	3178	0	0	0	0	0
103	2919	4044	1	0.125	1	W	W	1	1953	1952	1	4478	2819	0	2818	2815	0	0	0	0	0
103	4044	2919	1	0.125	1	W	W	1	1952	1953	1	2819	4478	0	2815	2818	0	0	0	0	0
104	2077	3200	1	0	1	W	W	1	1945	1956	11	3953	4478	0	3956	2818	0	0	0	0	0
104	3200	2077	1	0	1	W	W	1	1956	1945	11	4478	3953	0	2818	3956	0	0	0	0	0
105	2085	3208	1	0	1	W	W	1	1949	1954	5	3953	4478	0	3178	2818	0	0	0	0	0
105	3208	2085	1	0	1	W	W	1	1954	1949	5	4478	3953	0	2818	3178	0	0	0	0	0
106	2081	3200	1	0	1	W	W	1	1920	1956	36	3953	4478	0	4176	2818	0	0	0	0	0
106	3200	2081	1	0	1	W	W	1	1956	1920	36	4478	3953	0	2818	4176	0	0	0	0	0
107	2926	4044	1	0.5	1	W	W	1	1927	1952	25	2819	2819	1	4274	2815	0	0	0	0	0
107	4044	2926	1	0.5	1	W	W	1	1952	1927	25	2819	2819	1	2815	4274	0	0	0	0	0
108	2083	3200	1	0	1	W	W	1	1944	1956	12	3953	4478	0	3178	2818	0	0	0	0	0
108	3200	2083	1	0	1	W	W	1	1956	1944	12	4478	3953	0	2818	3178	0	0	0	0	0
109	2085	3200	1	0	1	W	W	1	1949	1956	7	3953	4478	0	3178	2818	0	0	0	0	0
109	3200	2085	1	0	1	W	W	1	1956	1949	7	4478	3953	0	2818	3178	0	0	0	0	0
110	2685	3793	1	0	1	P	P	1	1928	1926	2	3563	2006	0	3954	4280	0	0	0	0	0
110	3793	2685	1	0	1	P	P	1	1926	1928	2	2006	3563	0	4280	3954	0	0	0	0	0
111	2699	3793	1	0	1	P	P	1	1937	1926	11	3563	2006	0	3954	4280	0	0	0	0	0
111	3793	2699	1	0	1	P	P	1	1926	1937	11	2006	3563	0	4280	3954	0	0	0	0	0
112	2013	3100	2	0	1	G	G	1	1934	1933	1	2006	3463	0	4280	3178	0	0	0	0	0
112	3100	2013	2	0	1	G	G	1	1933	1934	1	3463	2006	0	3178	4280	0	0	0	0	0
113	2120	3200	1	0	1	P	W	0	1946	1956	10	2312	4478	0	3564	2818	0	0	0	0	0
113	3200	2120	1	0	1	W	P	0	1956	1946	10	4478	2312	0	2818	3564	0	0	0	0	0
116	2026	3100	3	0.0625	1	G	G	1	1940	1933	7	3731	3463	0	3711	3178	0	0	0	0	0
116	3100	2026	3	0.0625	1	G	G	1	1933	1940	7	3463	3731	0	3178	3711	0	0	0	0	0
117	2743	3813	1	0	1	P	P	1	1934	1918	16	3563	3814	0	3954	5156	0	0	0	0	0
117	3813	2743	1	0	1	P	P	1	1918	1934	16	3814	3563	0	5156	3954	0	0	0	0	0
121	2737	3793	1	0	0	P	P	1	1905	1926	21	3563	2006	0	4143	4280	0	0	0	0	0
121	3793	2737	1	0	0	P	P	1	1926	1905	21	2006	3563	0	4280	4143	0	0	0	0	0
122	2040	3090	2	0.125	1	W	W	1	1939	1955	16	3586	4394	0	3956	3178	0	0	0	0	0
122	3090	2040	2	0.125	1	W	W	1	1955	1939	16	4394	3586	0	3178	3956	0	0	0	0	0
123	2040	3088	6	0.125	1	W	W	1	1939	1948	9	3586	4394	0	3956	3178	0	0	0	0	0
123	3088	2040	6	0.125	1	W	W	1	1948	1939	9	4394	3586	0	3178	3956	0	0	0	0	0
124	2747	3793	1	0	1	P	P	1	1928	1926	2	2312	2006	0	3564	4280	0	0	0	0	0
124	3793	2747	1	0	1	P	P	1	1926	1928	2	2006	2312	0	4280	3564	0	0	0	0	0
125	2040	3085	3	0	0	W	W	1	1939	1913	26	3586	4394	0	3956	4395	0	0	0	0	0
125	3085	2040	3	0	0	W	W	1	1913	1939	26	4394	3586	0	4395	3956	0	0	0	0	0
126	2040	3084	2	0.125	1	W	W	1	1939	1939	0	3586	4159	0	3956	3178	0	0	0	0	0
126	3084	2040	2	0.125	1	W	W	1	1939	1939	0	4159	3586	0	3178	3956	0	0	0	0	0
127	2046	3090	1	0.25	1	W	W	1	1927	1955	28	3586	4394	0	3178	3178	1	0	0	0	0
127	3090	2046	1	0.25	1	W	W	1	1955	1927	28	4394	3586	0	3178	3178	1	0	0	0	0
128	2157	3200	1	0	1	P	W	0	1941	1956	15	3022	4478	0	2123	2818	0	0	0	0	0
128	3200	2157	1	0	1	W	P	0	1956	1941	15	4478	3022	0	2818	2123	0	0	0	0	0
129	2046	3088	5	0.25	1	W	W	1	1927	1948	21	3586	4394	0	3178	3178	1	0	0	0	0
129	3088	2046	5	0.25	1	W	W	1	1948	1927	21	4394	3586	0	3178	3178	1	0	0	0	0
130	2050	3090	2	0.125	1	W	W	1	1948	1955	7	3586	4394	0	3956	3178	0	1	1	2	1
130	3090	2050	2	0.125	1	W	W	1	1955	1948	7	4394	3586	0	3178	3956	0	0	1	2	1
131	2046	3085	5	0	0	W	W	1	1927	1913	14	3586	4394	0	3178	4395	0	0	1	3	1
131	3085	2046	5	0	0	W	W	1	1913	1927	14	4394	3586	0	4395	3178	0	1	1	3	1
132	2046	3084	2	0.25	1	W	W	1	1927	1939	12	3586	4159	0	3178	3178	1	0	0	0	0
132	3084	2046	2	0.25	1	W	W	1	1939	1927	12	4159	3586	0	3178	3178	1	0	0	0	0
133	2050	3088	4	0.125	1	W	W	1	1948	1948	0	3586	4394	0	3956	3178	0	1	0	0	1
133	3088	2050	4	0.125	1	W	W	1	1948	1948	0	4394	3586	0	3178	3956	0	0	0	0	1
134	2050	3085	1	0	0	W	W	1	1948	1913	35	3586	4394	0	3956	4395	0	1	0	0	1
134	3085	2050	1	0	0	W	W	1	1913	1948	35	4394	3586	0	4395	3956	0	0	0	0	1
135	2050	3084	1	0.125	1	W	W	1	1948	1939	9	3586	4159	0	3956	3178	0	1	0	0	1
135	3084	2050	1	0.125	1	W	W	1	1939	1948	9	4159	3586	0	3178	3956	0	0	0	0	1
136	2057	3088	3	0.125	1	W	W	1	1951	1948	3	3586	4394	0	3956	3178	0	0	1	1	1
136	3088	2057	3	0.125	1	W	W	1	1948	1951	3	4394	3586	0	3178	3956	0	0	1	1	1
137	2057	3085	2	0	0	W	W	1	1951	1913	38	3586	4394	0	3956	4395	0	0	0	0	0
137	3085	2057	2	0	0	W	W	1	1913	1951	38	4394	3586	0	4395	3956	0	0	0	0	0
138	2057	3084	2	0.125	1	W	W	1	1951	1939	12	3586	4159	0	3956	3178	0	0	0	0	0
138	3084	2057	2	0.125	1	W	W	1	1939	1951	12	4159	3586	0	3178	3956	0	0	0	0	0
139	2743	3769	1	0	1	P	G	0	1934	1916	18	3563	5142	0	3954	3766	0	0	0	0	0
139	3769	2743	1	0	1	G	P	0	1916	1934	18	5142	3563	0	3766	3954	0	0	0	0	0
140	2743	3768	1	0	1	P	G	0	1934	1913	21	3563	5142	0	3954	3766	0	0	0	0	0
140	3768	2743	1	0	1	G	P	0	1913	1934	21	5142	3563	0	3766	3954	0	0	0	0	0
142	2194	3210	1	0.21875	1	W	W	1	1950	1960	10	4478	4478	1	4274	2818	0	0	0	0	0
142	3210	2194	1	0.21875	1	W	W	1	1960	1950	10	4478	4478	1	2818	4274	0	0	0	0	0
143	2070	3085	2	0	0	W	W	1	1900	1913	13	3953	4394	0	3954	4395	0	0	0	0	0
143	3085	2070	2	0	0	W	W	1	1913	1900	13	4394	3953	0	4395	3954	0	0	0	0	0
144	2194	3208	1	0.21875	1	W	W	1	1950	1954	4	4478	4478	1	4274	2818	0	0	0	0	1
144	3208	2194	1	0.21875	1	W	W	1	1954	1950	4	4478	4478	1	2818	4274	0	1	0	0	1
145	2077	3088	2	0	1	W	W	1	1945	1948	3	3953	4394	0	3956	3178	0	0	0	0	0
145	3088	2077	2	0	1	W	W	1	1948	1945	3	4394	3953	0	3178	3956	0	0	0	0	0
146	2685	3696	1	0.03125	1	P	W	0	1928	1904	24	3563	3953	0	3954	4176	0	0	0	0	0
146	3696	2685	1	0.03125	1	W	P	0	1904	1928	24	3953	3563	0	4176	3954	0	0	0	0	0
147	2076	3085	1	0	0	W	W	1	1936	1913	23	3953	4394	0	3956	4395	0	0	0	0	0
147	3085	2076	1	0	0	W	W	1	1913	1936	23	4394	3953	0	4395	3956	0	0	0	0	0
148	2077	3085	2	0	0	W	W	1	1945	1913	32	3953	4394	0	3956	4395	0	0	0	0	0
148	3085	2077	2	0	0	W	W	1	1913	1945	32	4394	3953	0	4395	3956	0	0	0	0	0
149	2077	3084	1	0	1	W	W	1	1945	1939	6	3953	4159	0	3956	3178	0	0	0	0	0
149	3084	2077	1	0	1	W	W	1	1939	1945	6	4159	3953	0	3178	3956	0	0	0	0	0
150	2081	3088	2	0	1	W	W	1	1920	1948	28	3953	4394	0	4176	3178	0	0	0	0	0
150	3088	2081	2	0	1	W	W	1	1948	1920	28	4394	3953	0	3178	4176	0	0	0	0	0
151	2083	3090	1	0.125	1	W	W	1	1944	1955	11	3953	4394	0	3178	3178	1	0	0	0	0
151	3090	2083	1	0.125	1	W	W	1	1955	1944	11	4394	3953	0	3178	3178	1	0	0	0	0
152	2194	3200	1	0.21875	1	W	W	1	1950	1956	6	4478	4478	1	4274	2818	0	0	0	0	0
152	3200	2194	1	0.21875	1	W	W	1	1956	1950	6	4478	4478	1	2818	4274	0	0	0	0	0
153	2040	3045	2	0.5	1	W	W	1	1939	1945	6	3586	3586	1	3956	3956	1	0	0	0	0
153	3045	2040	2	0.5	1	W	W	1	1945	1939	6	3586	3586	1	3956	3956	1	0	0	0	0
154	2083	3088	5	0.125	1	W	W	1	1944	1948	4	3953	4394	0	3178	3178	1	0	0	0	0
154	3088	2083	5	0.125	1	W	W	1	1948	1944	4	4394	3953	0	3178	3178	1	0	0	0	0
155	2085	3090	1	0.125	1	W	W	1	1949	1955	6	3953	4394	0	3178	3178	1	0	0	0	0
155	3090	2085	1	0.125	1	W	W	1	1955	1949	6	4394	3953	0	3178	3178	1	0	0	0	0
156	2081	3085	4	0	0	W	W	1	1920	1913	7	3953	4394	0	4176	4395	0	0	0	0	0
156	3085	2081	4	0	0	W	W	1	1913	1920	7	4394	3953	0	4395	4176	0	0	0	0	0
157	2086	3090	1	0.125	1	W	W	1	1956	1955	1	3953	4394	0	3178	3178	1	0	0	0	0
157	3090	2086	1	0.125	1	W	W	1	1955	1956	1	4394	3953	0	3178	3178	1	0	0	0	0
158	2081	3084	1	0	1	W	W	1	1920	1939	19	3953	4159	0	4176	3178	0	0	0	0	0
158	3084	2081	1	0	1	W	W	1	1939	1920	19	4159	3953	0	3178	4176	0	0	0	0	0
159	2085	3088	3	0.125	1	W	W	1	1949	1948	1	3953	4394	0	3178	3178	1	0	0	0	0
159	3088	2085	3	0.125	1	W	W	1	1948	1949	1	4394	3953	0	3178	3178	1	0	0	0	0
160	2083	3085	3	0	0	W	W	1	1944	1913	31	3953	4394	0	3178	4395	0	0	0	0	0
160	3085	2083	3	0	0	W	W	1	1913	1944	31	4394	3953	0	4395	3178	0	0	0	0	0
161	2086	3088	1	0.125	1	W	W	1	1956	1948	8	3953	4394	0	3178	3178	1	0	0	0	0
161	3088	2086	1	0.125	1	W	W	1	1948	1956	8	4394	3953	0	3178	3178	1	0	0	0	0
162	2083	3084	2	0.125	1	W	W	1	1944	1939	5	3953	4159	0	3178	3178	1	0	0	0	0
162	3084	2083	2	0.125	1	W	W	1	1939	1944	5	4159	3953	0	3178	3178	1	0	0	0	0
163	2085	3085	2	0	0	W	W	1	1949	1913	36	3953	4394	0	3178	4395	0	0	0	0	0
163	3085	2085	2	0	0	W	W	1	1913	1949	36	4394	3953	0	4395	3178	0	0	0	0	0
164	2046	3045	2	0.5	1	W	W	1	1927	1945	18	3586	3586	1	3178	3956	0	0	0	0	0
164	3045	2046	2	0.5	1	W	W	1	1945	1927	18	3586	3586	1	3956	3178	0	0	0	0	0
165	2085	3084	2	0.125	1	W	W	1	1949	1939	10	3953	4159	0	3178	3178	1	0	0	0	0
165	3084	2085	2	0.125	1	W	W	1	1939	1949	10	4159	3953	0	3178	3178	1	0	0	0	0
166	3045	4044	1	0	1	W	W	1	1945	1952	7	3586	2819	0	3956	2815	0	0	0	0	0
166	4044	3045	1	0	1	W	W	1	1952	1945	7	2819	3586	0	2815	3956	0	0	0	0	0
167	2088	3085	2	0	0	P	W	0	1916	1913	3	2312	4394	0	2123	4395	0	0	0	0	0
167	3085	2088	2	0	0	W	P	0	1913	1916	3	4394	2312	0	4395	2123	0	0	0	0	0
168	2050	3045	1	0.5	1	W	W	1	1948	1945	3	3586	3586	1	3956	3956	1	0	0	0	0
168	3045	2050	1	0.5	1	W	W	1	1945	1948	3	3586	3586	1	3956	3956	1	0	0	0	0
169	2822	3813	2	0.5	1	G	P	0	1915	1918	3	3814	3814	1	5156	5156	1	0	0	0	0
169	3813	2822	2	0.5	1	P	G	0	1918	1915	3	3814	3814	1	5156	5156	1	0	0	0	0
170	2099	3088	1	0.0625	1	P	W	0	1946	1948	2	2312	4394	0	3564	3178	0	0	0	0	0
170	3088	2099	1	0.0625	1	W	P	0	1948	1946	2	4394	2312	0	3178	3564	0	0	0	0	0
171	2057	3045	2	0.375	1	W	W	1	1951	1945	6	3586	3586	1	3956	3956	1	0	0	0	0
171	3045	2057	2	0.375	1	W	W	1	1945	1951	6	3586	3586	1	3956	3956	1	0	0	0	0
172	2099	3085	1	0	0	P	W	0	1946	1913	33	2312	4394	0	3564	4395	0	0	0	0	0
172	3085	2099	1	0	0	W	P	0	1913	1946	33	4394	2312	0	4395	3564	0	0	0	0	0
173	2784	3769	1	0	0	G	G	1	1896	1916	20	3566	5142	0	3565	3766	0	0	0	0	0
173	3769	2784	1	0	0	G	G	1	1916	1896	20	5142	3566	0	3766	3565	0	0	0	0	0
174	2784	3768	1	0	0	G	G	1	1896	1913	17	3566	5142	0	3565	3766	0	0	0	0	0
174	3768	2784	1	0	0	G	G	1	1913	1896	17	5142	3566	0	3766	3565	0	0	0	0	0
175	2120	3090	1	0	1	P	W	0	1946	1955	9	2312	4394	0	3564	3178	0	0	0	0	0
175	3090	2120	1	0	1	W	P	0	1955	1946	9	4394	2312	0	3178	3564	0	0	0	0	0
176	2844	3813	3	0	1	G	P	0	1911	1918	7	2857	3814	0	5143	5156	0	0	0	0	0
176	3813	2844	3	0	1	P	G	0	1918	1911	7	3814	2857	0	5156	5143	0	0	0	0	0
177	2077	3045	1	0.25	1	W	W	1	1945	1945	0	3953	3586	0	3956	3956	1	0	0	0	0
177	3045	2077	1	0.25	1	W	W	1	1945	1945	0	3586	3953	0	3956	3956	1	0	0	0	0
178	2120	3088	1	0	1	P	W	0	1946	1948	2	2312	4394	0	3564	3178	0	0	0	0	0
178	3088	2120	1	0	1	W	P	0	1948	1946	2	4394	2312	0	3178	3564	0	0	0	0	0
179	2081	3045	1	0.0625	1	W	W	1	1920	1945	25	3953	3586	0	4176	3956	0	0	0	0	0
179	3045	2081	1	0.0625	1	W	W	1	1945	1920	25	3586	3953	0	3956	4176	0	0	0	0	0
180	2083	3045	2	0.15625	1	W	W	1	1944	1945	1	3953	3586	0	3178	3956	0	1	0	0	1
180	3045	2083	2	0.15625	1	W	W	1	1945	1944	1	3586	3953	0	3956	3178	0	0	0	0	1
181	2085	3045	2	0.15625	1	W	W	1	1949	1945	4	3953	3586	0	3178	3956	0	0	0	0	0
181	3045	2085	2	0.15625	1	W	W	1	1945	1949	4	3586	3953	0	3956	3178	0	0	0	0	0
182	2125	3085	2	0	0	P	W	0	1912	1913	1	2312	4394	0	2123	4395	0	0	0	0	0
182	3085	2125	2	0	0	W	P	0	1913	1912	1	4394	2312	0	4395	2123	0	0	0	0	0
183	3084	4044	1	0	1	W	W	1	1939	1952	13	4159	2819	0	3178	2815	0	0	0	0	0
183	4044	3084	1	0	1	W	W	1	1952	1939	13	2819	4159	0	2815	3178	0	0	0	0	0
184	2737	3696	4	0	0	P	W	0	1905	1904	1	3563	3953	0	4143	4176	0	0	0	0	0
184	3696	2737	4	0	0	W	P	0	1904	1905	1	3953	3563	0	4176	4143	0	0	0	0	0
185	3085	4044	1	0	0	W	W	1	1913	1952	39	4394	2819	0	4395	2815	0	0	0	0	0
185	4044	3085	1	0	0	W	W	1	1952	1913	39	2819	4394	0	2815	4395	0	0	0	0	0
186	3088	4044	1	0	1	W	W	1	1948	1952	4	4394	2819	0	3178	2815	0	0	0	0	0
186	4044	3088	1	0	1	W	W	1	1952	1948	4	2819	4394	0	2815	3178	0	0	0	0	0
187	2807	3757	1	0	1	W	W	1	1948	1957	9	4478	4161	0	2818	4274	0	0	0	0	0
187	3757	2807	1	0	1	W	W	1	1957	1948	9	4161	4478	0	4274	2818	0	0	0	0	0
188	2747	3696	1	0	1	P	W	0	1928	1904	24	2312	3953	0	3564	4176	0	0	0	0	0
188	3696	2747	1	0	1	W	P	0	1904	1928	24	3953	2312	0	4176	3564	0	0	0	0	0
189	2153	3100	1	0.125	1	P	G	0	1936	1933	3	2145	3463	0	3178	3178	1	0	0	0	0
189	3100	2153	1	0.125	1	G	P	0	1933	1936	3	3463	2145	0	3178	3178	1	0	0	0	0
190	2822	3769	2	0	1	G	G	1	1915	1916	1	3814	5142	0	5156	3766	0	0	0	0	0
190	3769	2822	2	0	1	G	G	1	1916	1915	1	5142	3814	0	3766	5156	0	0	0	0	0
191	2822	3768	2	0	1	G	G	1	1915	1913	2	3814	5142	0	5156	3766	0	0	0	0	0
191	3768	2822	2	0	1	G	G	1	1913	1915	2	5142	3814	0	3766	5156	0	0	0	0	0
192	2872	3813	1	0	1	G	P	0	1916	1918	2	2857	3814	0	5143	5156	0	0	0	0	0
192	3813	2872	1	0	1	P	G	0	1918	1916	2	3814	2857	0	5156	5143	0	0	0	0	0
193	2146	3085	2	0	0	P	W	0	1912	1913	1	2145	4394	0	2144	4395	0	0	0	0	0
193	3085	2146	2	0	0	W	P	0	1913	1912	1	4394	2145	0	4395	2144	0	0	0	0	0
194	2157	3090	1	0	1	P	W	0	1941	1955	14	3022	4394	0	2123	3178	0	0	0	0	0
194	3090	2157	1	0	1	W	P	0	1955	1941	14	4394	3022	0	3178	2123	0	0	0	0	0
195	2157	3088	1	0	1	P	W	0	1941	1948	7	3022	4394	0	2123	3178	0	0	0	0	0
195	3088	2157	1	0	1	W	P	0	1948	1941	7	4394	3022	0	3178	2123	0	0	0	0	0
196	2172	3100	2	0	1	G	G	1	1936	1933	3	4271	3463	0	5143	3178	0	0	0	0	1
196	3100	2172	2	0	1	G	G	1	1933	1936	3	3463	4271	0	3178	5143	0	1	0	0	1
197	2159	3085	1	0	0	B	W	0	1892	1913	21	2312	4394	0	2313	4395	0	0	0	0	0
197	3085	2159	1	0	0	W	B	0	1913	1892	21	4394	2312	0	4395	2313	0	0	0	0	0
198	2844	3769	4	0.125	1	G	G	1	1911	1916	5	2857	5142	0	5143	3766	0	0	0	0	1
198	3769	2844	4	0.125	1	G	G	1	1916	1911	5	5142	2857	0	3766	5143	0	1	0	0	1
199	2844	3768	5	0.125	1	G	G	1	1911	1913	2	2857	5142	0	5143	3766	0	0	0	0	0
199	3768	2844	5	0.125	1	G	G	1	1913	1911	2	5142	2857	0	3766	5143	0	0	0	0	0
200	2279	3200	1	0	1	P	W	0	1924	1956	32	2294	4478	0	2311	2818	0	0	0	0	0
200	3200	2279	1	0	1	W	P	0	1956	1924	32	4478	2294	0	2818	2311	0	0	0	0	0
202	2783	3696	1	0	1	W	W	1	1933	1904	29	4478	3953	0	2818	4176	0	0	0	0	0
202	3696	2783	1	0	1	W	W	1	1904	1933	29	3953	4478	0	4176	2818	0	0	0	0	0
203	2784	3696	3	0	0	G	W	0	1896	1904	8	3566	3953	0	3565	4176	0	0	0	0	0
203	3696	2784	3	0	0	W	G	0	1904	1896	8	3953	3566	0	4176	3565	0	0	0	0	0
204	2791	3696	2	0.125	1	W	W	1	1936	1904	32	3953	3953	1	3956	4176	0	0	0	0	0
204	3696	2791	2	0.125	1	W	W	1	1904	1936	32	3953	3953	1	4176	3956	0	0	0	0	0
207	2866	3768	1	0	1	G	G	1	1935	1913	22	3712	5142	0	3711	3766	0	0	0	0	0
207	3768	2866	1	0	1	G	G	1	1913	1935	22	5142	3712	0	3766	3711	0	0	0	0	0
209	2872	3769	2	0.125	1	G	G	1	1916	1916	0	2857	5142	0	5143	3766	0	0	0	0	1
209	3769	2872	2	0.125	1	G	G	1	1916	1916	0	5142	2857	0	3766	5143	0	1	0	0	1
210	2916	3813	1	0	1	W	P	0	1930	1918	12	4478	3814	0	2818	5156	0	0	0	0	0
210	3813	2916	1	0	1	P	W	0	1918	1930	12	3814	4478	0	5156	2818	0	0	0	0	0
211	2872	3768	3	0.125	1	G	G	1	1916	1913	3	2857	5142	0	5143	3766	0	0	0	0	0
211	3768	2872	3	0.125	1	G	G	1	1913	1916	3	5142	2857	0	3766	5143	0	0	0	0	0
212	2801	3696	2	0	1	W	W	1	1913	1904	9	4478	3953	0	2815	4176	0	0	0	0	0
212	3696	2801	2	0	1	W	W	1	1904	1913	9	3953	4478	0	4176	2815	0	0	0	0	0
213	2194	3088	1	0	1	W	W	1	1950	1948	2	4478	4394	0	4274	3178	0	0	0	0	1
213	3088	2194	1	0	1	W	W	1	1948	1950	2	4394	4478	0	3178	4274	0	1	0	0	1
217	2194	3085	1	0	0	W	W	1	1950	1913	37	4478	4394	0	4274	4395	0	0	0	0	0
217	3085	2194	1	0	0	W	W	1	1913	1950	37	4394	4478	0	4395	4274	0	0	0	0	0
219	2194	3084	1	0	1	W	W	1	1950	1939	11	4478	4159	0	4274	3178	0	0	0	0	0
219	3084	2194	1	0	1	W	W	1	1939	1950	11	4159	4478	0	3178	4274	0	0	0	0	0
220	2806	3696	2	0	1	W	W	1	1942	1904	38	4478	3953	0	2818	4176	0	0	0	0	0
220	3696	2806	2	0	1	W	W	1	1904	1942	38	3953	4478	0	4176	2818	0	0	0	0	0
221	2807	3696	2	0	1	W	W	1	1948	1904	44	4478	3953	0	2818	4176	0	0	0	0	0
221	3696	2807	2	0	1	W	W	1	1904	1948	44	3953	4478	0	4176	2818	0	0	0	0	0
222	2809	3696	1	0	1	W	W	1	1950	1904	46	4478	3953	0	2818	4176	0	0	0	0	0
222	3696	2809	1	0	1	W	W	1	1904	1950	46	3953	4478	0	4176	2818	0	0	0	0	0
223	2040	2926	3	0	1	W	W	1	1939	1927	12	3586	2819	0	3956	4274	0	0	0	0	0
223	2926	2040	3	0	1	W	W	1	1927	1939	12	2819	3586	0	4274	3956	0	0	0	0	0
224	2811	3696	1	0	1	W	W	1	1954	1904	50	4478	3953	0	2818	4176	0	0	0	0	0
224	3696	2811	1	0	1	W	W	1	1904	1954	50	3953	4478	0	4176	2818	0	0	0	0	0
225	2328	3210	1	0	1	W	W	1	1918	1960	42	4161	4478	0	3178	2818	0	0	0	0	0
225	3210	2328	1	0	1	W	W	1	1960	1918	42	4478	4161	0	2818	3178	0	0	0	0	0
226	2046	2926	3	0	1	W	W	1	1927	1927	0	3586	2819	0	3178	4274	0	0	0	0	0
226	2926	2046	3	0	1	W	W	1	1927	1927	0	2819	3586	0	4274	3178	0	0	0	0	0
227	2328	3208	1	0	1	W	W	1	1918	1954	36	4161	4478	0	3178	2818	0	0	0	0	0
227	3208	2328	1	0	1	W	W	1	1954	1918	36	4478	4161	0	2818	3178	0	0	0	0	0
228	2040	2919	1	0	1	W	W	1	1939	1953	14	3586	4478	0	3956	2818	0	0	0	0	0
228	2919	2040	1	0	1	W	W	1	1953	1939	14	4478	3586	0	2818	3956	0	0	0	0	0
229	2040	2918	3	0	1	W	W	1	1939	1945	6	3586	4478	0	3956	2818	0	0	0	0	0
229	2918	2040	3	0	1	W	W	1	1945	1939	6	4478	3586	0	2818	3956	0	0	0	0	0
230	2040	2917	3	0	1	W	W	1	1939	1934	5	3586	4478	0	3956	2818	0	0	0	0	0
230	2917	2040	3	0	1	W	W	1	1934	1939	5	4478	3586	0	2818	3956	0	0	0	0	0
231	2040	2916	3	0	1	W	W	1	1939	1930	9	3586	4478	0	3956	2818	0	0	0	0	0
231	2916	2040	3	0	1	W	W	1	1930	1939	9	4478	3586	0	2818	3956	0	0	0	0	0
232	2050	2926	3	0	1	W	W	1	1948	1927	21	3586	2819	0	3956	4274	0	0	0	0	0
232	2926	2050	3	0	1	W	W	1	1927	1948	21	2819	3586	0	4274	3956	0	0	0	0	0
233	2046	2919	1	0	1	W	W	1	1927	1953	26	3586	4478	0	3178	2818	0	0	0	0	0
233	2919	2046	1	0	1	W	W	1	1953	1927	26	4478	3586	0	2818	3178	0	0	0	0	0
234	2046	2918	4	0	1	W	W	1	1927	1945	18	3586	4478	0	3178	2818	0	0	0	0	0
234	2918	2046	4	0	1	W	W	1	1945	1927	18	4478	3586	0	2818	3178	0	0	0	0	0
235	2328	3200	2	0	1	W	W	1	1918	1956	38	4161	4478	0	3178	2818	0	0	0	0	0
235	3200	2328	2	0	1	W	W	1	1956	1918	38	4478	4161	0	2818	3178	0	0	0	0	0
236	2046	2917	3	0	1	W	W	1	1927	1934	7	3586	4478	0	3178	2818	0	0	0	0	0
236	2917	2046	3	0	1	W	W	1	1934	1927	7	4478	3586	0	2818	3178	0	0	0	0	0
237	2046	2916	4	0	1	W	W	1	1927	1930	3	3586	4478	0	3178	2818	0	0	0	0	0
237	2916	2046	4	0	1	W	W	1	1930	1927	3	4478	3586	0	2818	3178	0	0	0	0	0
238	2050	2919	1	0	1	W	W	1	1948	1953	5	3586	4478	0	3956	2818	0	0	0	0	0
238	2919	2050	1	0	1	W	W	1	1953	1948	5	4478	3586	0	2818	3956	0	0	0	0	0
239	2057	2926	2	0	1	W	W	1	1951	1927	24	3586	2819	0	3956	4274	0	0	0	0	0
239	2926	2057	2	0	1	W	W	1	1927	1951	24	2819	3586	0	4274	3956	0	0	0	0	0
240	2050	2918	2	0	1	W	W	1	1948	1945	3	3586	4478	0	3956	2818	0	0	0	0	0
240	2918	2050	2	0	1	W	W	1	1945	1948	3	4478	3586	0	2818	3956	0	0	0	0	0
241	2050	2917	2	0	1	W	W	1	1948	1934	14	3586	4478	0	3956	2818	0	0	0	0	0
241	2917	2050	2	0	1	W	W	1	1934	1948	14	4478	3586	0	2818	3956	0	0	0	0	0
242	2050	2916	3	0	1	W	W	1	1948	1930	18	3586	4478	0	3956	2818	0	0	0	0	0
242	2916	2050	3	0	1	W	W	1	1930	1948	18	4478	3586	0	2818	3956	0	0	0	0	0
243	2057	2919	1	0	1	W	W	1	1951	1953	2	3586	4478	0	3956	2818	0	0	0	0	0
243	2919	2057	1	0	1	W	W	1	1953	1951	2	4478	3586	0	2818	3956	0	0	0	0	0
244	2057	2918	2	0	1	W	W	1	1951	1945	6	3586	4478	0	3956	2818	0	0	0	0	0
244	2918	2057	2	0	1	W	W	1	1945	1951	6	4478	3586	0	2818	3956	0	0	0	0	0
245	2057	2917	2	0	1	W	W	1	1951	1934	17	3586	4478	0	3956	2818	0	0	0	0	0
245	2917	2057	2	0	1	W	W	1	1934	1951	17	4478	3586	0	2818	3956	0	0	0	0	0
246	2013	2872	2	0	1	G	G	1	1934	1916	18	2006	2857	0	4280	5143	0	0	0	0	1
246	2872	2013	2	0	1	G	G	1	1916	1934	18	2857	2006	0	5143	4280	0	1	0	0	1
247	2057	2916	2	0	1	W	W	1	1951	1930	21	3586	4478	0	3956	2818	0	0	0	0	0
247	2916	2057	2	0	1	W	W	1	1930	1951	21	4478	3586	0	2818	3956	0	0	0	0	0
248	2013	2866	1	0	1	G	G	1	1934	1935	1	2006	3712	0	4280	3711	0	0	0	0	0
248	2866	2013	1	0	1	G	G	1	1935	1934	1	3712	2006	0	3711	4280	0	0	0	0	0
249	2916	3769	1	0	1	W	G	0	1930	1916	14	4478	5142	0	2818	3766	0	0	0	0	0
249	3769	2916	1	0	1	G	W	0	1916	1930	14	5142	4478	0	3766	2818	0	0	0	0	0
250	2916	3768	1	0	1	W	G	0	1930	1913	17	4478	5142	0	2818	3766	0	0	0	0	0
250	3768	2916	1	0	1	G	W	0	1913	1930	17	5142	4478	0	3766	2818	0	0	0	0	0
251	2194	3045	1	0	1	W	W	1	1950	1945	5	4478	3586	0	4274	3956	0	0	0	0	0
251	3045	2194	1	0	1	W	W	1	1945	1950	5	3586	4478	0	3956	4274	0	0	0	0	0
252	2077	2926	1	0	1	W	W	1	1945	1927	18	3953	2819	0	3956	4274	0	0	0	0	0
252	2926	2077	1	0	1	W	W	1	1927	1945	18	2819	3953	0	4274	3956	0	0	0	0	0
253	2070	2918	1	0	0	W	W	1	1900	1945	45	3953	4478	0	3954	2818	0	0	0	0	0
253	2918	2070	1	0	0	W	W	1	1945	1900	45	4478	3953	0	2818	3954	0	0	0	0	0
254	2070	2917	1	0	0	W	W	1	1900	1934	34	3953	4478	0	3954	2818	0	0	0	0	0
254	2917	2070	1	0	0	W	W	1	1934	1900	34	4478	3953	0	2818	3954	0	0	0	0	0
255	2026	2872	3	0	1	G	G	1	1940	1916	24	3731	2857	0	3711	5143	0	0	0	0	0
255	2872	2026	3	0	1	G	G	1	1916	1940	24	2857	3731	0	5143	3711	0	0	0	0	0
256	2081	2926	1	0	1	W	W	1	1920	1927	7	3953	2819	0	4176	4274	0	0	0	0	0
256	2926	2081	1	0	1	W	W	1	1927	1920	7	2819	3953	0	4274	4176	0	0	0	0	0
257	3200	4044	1	0.125	1	W	W	1	1956	1952	4	4478	2819	0	2818	2815	0	0	0	0	0
257	4044	3200	1	0.125	1	W	W	1	1952	1956	4	2819	4478	0	2815	2818	0	0	0	0	0
258	2083	2926	2	0	1	W	W	1	1944	1927	17	3953	2819	0	3178	4274	0	0	0	0	0
258	2926	2083	2	0	1	W	W	1	1927	1944	17	2819	3953	0	4274	3178	0	0	0	0	0
259	2076	2918	1	0	1	W	W	1	1936	1945	9	3953	4478	0	3956	2818	0	0	0	0	0
259	2918	2076	1	0	1	W	W	1	1945	1936	9	4478	3953	0	2818	3956	0	0	0	0	0
260	2077	2919	1	0	1	W	W	1	1945	1953	8	3953	4478	0	3956	2818	0	0	0	0	0
260	2919	2077	1	0	1	W	W	1	1953	1945	8	4478	3953	0	2818	3956	0	0	0	0	0
261	2077	2918	2	0	1	W	W	1	1945	1945	0	3953	4478	0	3956	2818	0	0	0	0	0
261	2918	2077	2	0	1	W	W	1	1945	1945	0	4478	3953	0	2818	3956	0	0	0	0	0
262	2085	2926	1	0	1	W	W	1	1949	1927	22	3953	2819	0	3178	4274	0	0	0	0	0
262	2926	2085	1	0	1	W	W	1	1927	1949	22	2819	3953	0	4274	3178	0	0	0	0	0
263	2026	2866	1	0.25	1	G	G	1	1940	1935	5	3731	3712	0	3711	3711	1	0	0	0	0
263	2866	2026	1	0.25	1	G	G	1	1935	1940	5	3712	3731	0	3711	3711	1	0	0	0	0
264	2077	2917	1	0	1	W	W	1	1945	1934	11	3953	4478	0	3956	2818	0	0	0	0	0
264	2917	2077	1	0	1	W	W	1	1934	1945	11	4478	3953	0	2818	3956	0	0	0	0	0
266	2077	2916	1	0	1	W	W	1	1945	1930	15	3953	4478	0	3956	2818	0	0	0	0	0
266	2916	2077	1	0	1	W	W	1	1930	1945	15	4478	3953	0	2818	3956	0	0	0	0	0
267	2081	2919	1	0	1	W	W	1	1920	1953	33	3953	4478	0	4176	2818	0	0	0	0	0
267	2919	2081	1	0	1	W	W	1	1953	1920	33	4478	3953	0	2818	4176	0	0	0	0	0
268	2088	2926	1	0	1	P	W	0	1916	1927	11	2312	2819	0	2123	4274	0	0	0	0	0
268	2926	2088	1	0	1	W	P	0	1927	1916	11	2819	2312	0	4274	2123	0	0	0	0	0
269	2081	2918	3	0	1	W	W	1	1920	1945	25	3953	4478	0	4176	2818	0	0	0	0	0
269	2918	2081	3	0	1	W	W	1	1945	1920	25	4478	3953	0	2818	4176	0	0	0	0	0
270	2081	2917	1	0	1	W	W	1	1920	1934	14	3953	4478	0	4176	2818	0	0	0	0	0
270	2917	2081	1	0	1	W	W	1	1934	1920	14	4478	3953	0	2818	4176	0	0	0	0	0
271	2083	2919	1	0	1	W	W	1	1944	1953	9	3953	4478	0	3178	2818	0	0	0	0	0
271	2919	2083	1	0	1	W	W	1	1953	1944	9	4478	3953	0	2818	3178	0	0	0	0	0
272	3208	4044	1	0.125	1	W	W	1	1954	1952	2	4478	2819	0	2818	2815	0	0	0	0	0
272	4044	3208	1	0.125	1	W	W	1	1952	1954	2	2819	4478	0	2815	2818	0	0	0	0	0
273	2081	2916	2	0	1	W	W	1	1920	1930	10	3953	4478	0	4176	2818	0	0	0	0	0
273	2916	2081	2	0	1	W	W	1	1930	1920	10	4478	3953	0	2818	4176	0	0	0	0	0
274	2083	2918	3	0	1	W	W	1	1944	1945	1	3953	4478	0	3178	2818	0	0	0	0	0
274	2918	2083	3	0	1	W	W	1	1945	1944	1	4478	3953	0	2818	3178	0	0	0	0	0
275	2083	2917	2	0	1	W	W	1	1944	1934	10	3953	4478	0	3178	2818	0	0	0	0	0
275	2917	2083	2	0	1	W	W	1	1934	1944	10	4478	3953	0	2818	3178	0	0	0	0	0
276	2085	2919	1	0	1	W	W	1	1949	1953	4	3953	4478	0	3178	2818	0	0	0	0	0
276	2919	2085	1	0	1	W	W	1	1953	1949	4	4478	3953	0	2818	3178	0	0	0	0	0
277	3210	4044	1	0.125	1	W	W	1	1960	1952	8	4478	2819	0	2818	2815	0	0	0	0	0
277	4044	3210	1	0.125	1	W	W	1	1952	1960	8	2819	4478	0	2815	2818	0	0	0	0	0
278	2083	2916	2	0	1	W	W	1	1944	1930	14	3953	4478	0	3178	2818	0	0	0	0	0
278	2916	2083	2	0	1	W	W	1	1930	1944	14	4478	3953	0	2818	3178	0	0	0	0	0
279	2085	2918	1	0	1	W	W	1	1949	1945	4	3953	4478	0	3178	2818	0	0	0	0	0
279	2918	2085	1	0	1	W	W	1	1945	1949	4	4478	3953	0	2818	3178	0	0	0	0	0
280	2936	3769	1	0	1	G	G	1	1934	1916	18	3566	5142	0	3564	3766	0	0	0	0	0
280	3769	2936	1	0	1	G	G	1	1916	1934	18	5142	3566	0	3766	3564	0	0	0	0	0
281	2085	2917	2	0	1	W	W	1	1949	1934	15	3953	4478	0	3178	2818	0	0	0	0	0
281	2917	2085	2	0	1	W	W	1	1934	1949	15	4478	3953	0	2818	3178	0	0	0	0	0
282	2936	3768	1	0	1	G	G	1	1934	1913	21	3566	5142	0	3564	3766	0	0	0	0	0
282	3768	2936	1	0	1	G	G	1	1913	1934	21	5142	3566	0	3766	3564	0	0	0	0	0
283	2085	2916	1	0	1	W	W	1	1949	1930	19	3953	4478	0	3178	2818	0	0	0	0	0
283	2916	2085	1	0	1	W	W	1	1930	1949	19	4478	3953	0	2818	3178	0	0	0	0	0
284	2088	2917	1	0	1	P	W	0	1916	1934	18	2312	4478	0	2123	2818	0	0	0	0	0
284	2917	2088	1	0	1	W	P	0	1934	1916	18	4478	2312	0	2818	2123	0	0	0	0	0
285	2013	2836	2	0	1	G	G	1	1934	1932	2	2006	3712	0	4280	3711	0	0	0	0	0
285	2836	2013	2	0	1	G	G	1	1932	1934	2	3712	2006	0	3711	4280	0	0	0	0	0
286	2099	2918	1	0	1	P	W	0	1946	1945	1	2312	4478	0	3564	2818	0	0	0	0	0
286	2918	2099	1	0	1	W	P	0	1945	1946	1	4478	2312	0	2818	3564	0	0	0	0	0
287	2040	2852	1	0	1	W	W	1	1939	1946	7	3586	3022	0	3956	2123	0	0	0	0	1
287	2852	2040	1	0	1	W	W	1	1946	1939	7	3022	3586	0	2123	3956	0	1	0	0	1
288	2279	3090	1	0	1	P	W	0	1924	1955	31	2294	4394	0	2311	3178	0	0	0	0	0
288	3090	2279	1	0	1	W	P	0	1955	1924	31	4394	2294	0	3178	2311	0	0	0	0	0
289	2026	2836	2	0.25	1	G	G	1	1940	1932	8	3731	3712	0	3711	3711	1	0	0	0	0
289	2836	2026	2	0.25	1	G	G	1	1932	1940	8	3712	3731	0	3711	3711	1	0	0	0	0
290	2279	3088	1	0	1	P	W	0	1924	1948	24	2294	4394	0	2311	3178	0	0	0	0	0
290	3088	2279	1	0	1	W	P	0	1948	1924	24	4394	2294	0	3178	2311	0	0	0	0	0
291	2046	2852	1	0	1	W	W	1	1927	1946	19	3586	3022	0	3178	2123	0	0	0	0	1
291	2852	2046	1	0	1	W	W	1	1946	1927	19	3022	3586	0	2123	3178	0	1	0	0	1
292	2120	2926	1	0	1	P	W	0	1946	1927	19	2312	2819	0	3564	4274	0	0	0	0	0
292	2926	2120	1	0	1	W	P	0	1927	1946	19	2819	2312	0	4274	3564	0	0	0	0	0
293	2050	2852	1	0	1	W	W	1	1948	1946	2	3586	3022	0	3956	2123	0	0	0	0	1
293	2852	2050	1	0	1	W	W	1	1946	1948	2	3022	3586	0	2123	3956	0	1	0	0	1
294	2125	2926	1	0	1	P	W	0	1912	1927	15	2312	2819	0	2123	4274	0	0	0	0	0
294	2926	2125	1	0	1	W	P	0	1927	1912	15	2819	2312	0	4274	2123	0	0	0	0	0
295	2120	2917	1	0	1	P	W	0	1946	1934	12	2312	4478	0	3564	2818	0	0	0	0	0
295	2917	2120	1	0	1	W	P	0	1934	1946	12	4478	2312	0	2818	3564	0	0	0	0	0
297	2120	2916	1	0	1	P	W	0	1946	1930	16	2312	4478	0	3564	2818	0	0	0	0	0
297	2916	2120	1	0	1	W	P	0	1930	1946	16	4478	2312	0	2818	3564	0	0	0	0	0
299	2125	2917	1	0	1	P	W	0	1912	1934	22	2312	4478	0	2123	2818	0	0	0	0	0
299	2917	2125	1	0	1	W	P	0	1934	1912	22	4478	2312	0	2818	2123	0	0	0	0	0
300	2148	2936	2	0	1	G	G	1	1927	1934	7	2145	3566	0	3178	3564	0	1	0	0	1
300	2936	2148	2	0	1	G	G	1	1934	1927	7	3566	2145	0	3564	3178	0	0	0	0	1
302	2426	3210	1	0	1	W	W	1	1942	1960	18	3953	4478	0	3178	2818	0	0	0	0	0
302	3210	2426	1	0	1	W	W	1	1960	1942	18	4478	3953	0	2818	3178	0	0	0	0	0
304	2426	3208	1	0	1	W	W	1	1942	1954	12	3953	4478	0	3178	2818	0	0	0	0	0
304	3208	2426	1	0	1	W	W	1	1954	1942	12	4478	3953	0	2818	3178	0	0	0	0	0
307	2916	3696	2	0	1	W	W	1	1930	1904	26	4478	3953	0	2818	4176	0	0	0	0	0
307	3696	2916	2	0	1	W	W	1	1904	1930	26	3953	4478	0	4176	2818	0	0	0	0	0
308	2917	3696	2	0	1	W	W	1	1934	1904	30	4478	3953	0	2818	4176	0	0	0	0	0
308	3696	2917	2	0	1	W	W	1	1904	1934	30	3953	4478	0	4176	2818	0	0	0	0	0
309	2918	3696	2	0	1	W	W	1	1945	1904	41	4478	3953	0	2818	4176	0	0	0	0	0
309	3696	2918	2	0	1	W	W	1	1904	1945	41	3953	4478	0	4176	2818	0	0	0	0	0
310	2149	2926	1	0	1	P	W	0	1930	1927	3	2145	2819	0	3178	4274	0	0	0	0	0
310	2926	2149	1	0	1	W	P	0	1927	1930	3	2819	2145	0	4274	3178	0	0	0	0	0
311	2919	3696	1	0	1	W	W	1	1953	1904	49	4478	3953	0	2818	4176	0	0	0	0	0
311	3696	2919	1	0	1	W	W	1	1904	1953	49	3953	4478	0	4176	2818	0	0	0	0	0
312	2426	3200	2	0	1	W	W	1	1942	1956	14	3953	4478	0	3178	2818	0	0	0	0	0
312	3200	2426	2	0	1	W	W	1	1956	1942	14	4478	3953	0	2818	3178	0	0	0	0	0
313	2040	2811	1	0	1	W	W	1	1939	1954	15	3586	4478	0	3956	2818	0	0	0	0	0
313	2811	2040	1	0	1	W	W	1	1954	1939	15	4478	3586	0	2818	3956	0	0	0	0	0
314	2146	2917	1	0	0	P	W	0	1912	1934	22	2145	4478	0	2144	2818	0	0	0	0	0
314	2917	2146	1	0	0	W	P	0	1934	1912	22	4478	2145	0	2818	2144	0	0	0	0	0
315	2926	3696	1	0	1	W	W	1	1927	1904	23	2819	3953	0	4274	4176	0	0	0	0	0
315	3696	2926	1	0	1	W	W	1	1904	1927	23	3953	2819	0	4176	4274	0	0	0	0	0
316	2040	2809	2	0	1	W	W	1	1939	1950	11	3586	4478	0	3956	2818	0	0	0	0	0
316	2809	2040	2	0	1	W	W	1	1950	1939	11	4478	3586	0	2818	3956	0	0	0	0	0
317	2157	2926	1	0	1	P	W	0	1941	1927	14	3022	2819	0	2123	4274	0	0	0	0	0
317	2926	2157	1	0	1	W	P	0	1927	1941	14	2819	3022	0	4274	2123	0	0	0	0	0
318	2158	2926	1	0	1	B	W	0	1926	1927	1	2312	2819	0	2123	4274	0	0	0	0	0
318	2926	2158	1	0	1	W	B	0	1927	1926	1	2819	2312	0	4274	2123	0	0	0	0	0
319	2040	2807	6	0	1	W	W	1	1939	1948	9	3586	4478	0	3956	2818	0	0	0	0	0
319	2807	2040	6	0	1	W	W	1	1948	1939	9	4478	3586	0	2818	3956	0	0	0	0	0
320	2159	2926	1	0	0	B	W	0	1892	1927	35	2312	2819	0	2313	4274	0	0	0	0	0
320	2926	2159	1	0	0	W	B	0	1927	1892	35	2819	2312	0	4274	2313	0	0	0	0	0
321	2040	2806	3	0	1	W	W	1	1939	1942	3	3586	4478	0	3956	2818	0	0	0	0	0
321	2806	2040	3	0	1	W	W	1	1942	1939	3	4478	3586	0	2818	3956	0	0	0	0	0
322	2046	2811	1	0	1	W	W	1	1927	1954	27	3586	4478	0	3178	2818	0	0	0	0	0
322	2811	2046	1	0	1	W	W	1	1954	1927	27	4478	3586	0	2818	3178	0	0	0	0	0
323	2046	2809	2	0	1	W	W	1	1927	1950	23	3586	4478	0	3178	2818	0	0	0	0	0
323	2809	2046	2	0	1	W	W	1	1950	1927	23	4478	3586	0	2818	3178	0	0	0	0	0
324	2328	3090	1	0.0625	1	W	W	1	1918	1955	37	4161	4394	0	3178	3178	1	0	0	0	0
324	3090	2328	1	0.0625	1	W	W	1	1955	1918	37	4394	4161	0	3178	3178	1	0	0	0	0
325	2040	2801	1	0	1	W	W	1	1939	1913	26	3586	4478	0	3956	2815	0	0	0	0	0
325	2801	2040	1	0	1	W	W	1	1913	1939	26	4478	3586	0	2815	3956	0	0	0	0	0
326	2046	2807	5	0	1	W	W	1	1927	1948	21	3586	4478	0	3178	2818	0	0	0	0	0
326	2807	2046	5	0	1	W	W	1	1948	1927	21	4478	3586	0	2818	3178	0	0	0	0	0
327	2050	2811	1	0	1	W	W	1	1948	1954	6	3586	4478	0	3956	2818	0	0	0	0	0
327	2811	2050	1	0	1	W	W	1	1954	1948	6	4478	3586	0	2818	3956	0	0	0	0	0
328	2046	2806	3	0	1	W	W	1	1927	1942	15	3586	4478	0	3178	2818	0	0	0	0	0
328	2806	2046	3	0	1	W	W	1	1942	1927	15	4478	3586	0	2818	3178	0	0	0	0	0
329	2157	2917	1	0	1	P	W	0	1941	1934	7	3022	4478	0	2123	2818	0	0	0	0	0
329	2917	2157	1	0	1	W	P	0	1934	1941	7	4478	3022	0	2818	2123	0	0	0	0	0
330	2328	3088	3	0.0625	1	W	W	1	1918	1948	30	4161	4394	0	3178	3178	1	0	0	0	0
330	3088	2328	3	0.0625	1	W	W	1	1948	1918	30	4394	4161	0	3178	3178	1	0	0	0	0
331	2050	2809	2	0	1	W	W	1	1948	1950	2	3586	4478	0	3956	2818	0	0	0	0	0
331	2809	2050	2	0	1	W	W	1	1950	1948	2	4478	3586	0	2818	3956	0	0	0	0	0
332	2157	2916	1	0	1	P	W	0	1941	1930	11	3022	4478	0	2123	2818	0	0	0	0	0
332	2916	2157	1	0	1	W	P	0	1930	1941	11	4478	3022	0	2818	2123	0	0	0	0	0
333	2159	2917	1	0	0	B	W	0	1892	1934	42	2312	4478	0	2313	2818	0	0	0	0	0
333	2917	2159	1	0	0	W	B	0	1934	1892	42	4478	2312	0	2818	2313	0	0	0	0	0
335	2050	2807	4	0	1	W	W	1	1948	1948	0	3586	4478	0	3956	2818	0	0	0	0	0
335	2807	2050	4	0	1	W	W	1	1948	1948	0	4478	3586	0	2818	3956	0	0	0	0	0
336	2328	3085	3	0	0	W	W	1	1918	1913	5	4161	4394	0	3178	4395	0	0	0	0	0
336	3085	2328	3	0	0	W	W	1	1913	1918	5	4394	4161	0	4395	3178	0	0	0	0	0
337	2050	2806	2	0	1	W	W	1	1948	1942	6	3586	4478	0	3956	2818	0	0	0	0	0
337	2806	2050	2	0	1	W	W	1	1942	1948	6	4478	3586	0	2818	3956	0	0	0	0	0
338	2328	3084	1	0.0625	1	W	W	1	1918	1939	21	4161	4159	0	3178	3178	1	0	0	0	0
338	3084	2328	1	0.0625	1	W	W	1	1939	1918	21	4159	4161	0	3178	3178	1	0	0	0	0
339	2046	2801	2	0	1	W	W	1	1927	1913	14	3586	4478	0	3178	2815	0	0	0	0	0
339	2801	2046	2	0	1	W	W	1	1913	1927	14	4478	3586	0	2815	3178	0	0	0	0	0
340	2057	2811	1	0	1	W	W	1	1951	1954	3	3586	4478	0	3956	2818	0	0	0	0	0
340	2811	2057	1	0	1	W	W	1	1954	1951	3	4478	3586	0	2818	3956	0	0	0	0	0
341	2057	2809	1	0	1	W	W	1	1951	1950	1	3586	4478	0	3956	2818	0	0	0	0	0
341	2809	2057	1	0	1	W	W	1	1950	1951	1	4478	3586	0	2818	3956	0	0	0	0	0
342	2057	2807	3	0	1	W	W	1	1951	1948	3	3586	4478	0	3956	2818	0	0	0	0	0
342	2807	2057	3	0	1	W	W	1	1948	1951	3	4478	3586	0	2818	3956	0	0	0	0	0
343	2460	3210	1	0.3125	1	W	W	1	1938	1960	22	4478	4478	1	2818	2818	1	0	0	0	0
343	3210	2460	1	0.3125	1	W	W	1	1960	1938	22	4478	4478	1	2818	2818	1	0	0	0	0
344	2057	2806	3	0	1	W	W	1	1951	1942	9	3586	4478	0	3956	2818	0	0	0	0	0
344	2806	2057	3	0	1	W	W	1	1942	1951	9	4478	3586	0	2818	3956	0	0	0	0	0
345	2460	3208	1	0.3125	1	W	W	1	1938	1954	16	4478	4478	1	2818	2818	1	0	0	0	0
345	3208	2460	1	0.3125	1	W	W	1	1954	1938	16	4478	4478	1	2818	2818	1	0	0	0	0
346	2046	2791	2	0	1	W	W	1	1927	1936	9	3586	3953	0	3178	3956	0	1	1	2	1
346	2791	2046	2	0	1	W	W	1	1936	1927	9	3953	3586	0	3956	3178	0	0	1	2	1
347	2040	2783	1	0	1	W	W	1	1939	1933	6	3586	4478	0	3956	2818	0	0	0	0	0
347	2783	2040	1	0	1	W	W	1	1933	1939	6	4478	3586	0	2818	3956	0	0	0	0	0
348	2460	3200	2	0.3125	1	W	W	1	1938	1956	18	4478	4478	1	2818	2818	1	0	0	0	0
348	3200	2460	2	0.3125	1	W	W	1	1956	1938	18	4478	4478	1	2818	2818	1	0	0	0	0
349	2046	2783	1	0	1	W	W	1	1927	1933	6	3586	4478	0	3178	2818	0	0	0	0	0
349	2783	2046	1	0	1	W	W	1	1933	1927	6	4478	3586	0	2818	3178	0	0	0	0	0
351	2077	2811	1	0	1	W	W	1	1945	1954	9	3953	4478	0	3956	2818	0	1	0	0	1
351	2811	2077	1	0	1	W	W	1	1954	1945	9	4478	3953	0	2818	3956	0	0	0	0	1
352	2088	2822	3	0	1	P	G	0	1916	1915	1	2312	3814	0	2123	5156	0	0	0	0	0
352	2822	2088	3	0	1	G	P	0	1915	1916	1	3814	2312	0	5156	2123	0	0	0	0	0
354	2050	2783	1	0	1	W	W	1	1948	1933	15	3586	4478	0	3956	2818	0	0	0	0	0
354	2783	2050	1	0	1	W	W	1	1933	1948	15	4478	3586	0	2818	3956	0	0	0	0	0
355	2077	2809	1	0	1	W	W	1	1945	1950	5	3953	4478	0	3956	2818	0	1	0	0	1
355	2809	2077	1	0	1	W	W	1	1950	1945	5	4478	3953	0	2818	3956	0	0	0	0	1
356	2120	2852	1	0.09375	1	P	W	0	1946	1946	0	2312	3022	0	3564	2123	0	0	0	0	1
356	2852	2120	1	0.09375	1	W	P	0	1946	1946	0	3022	2312	0	2123	3564	0	1	0	0	1
357	2194	2926	1	0.25	1	W	W	1	1950	1927	23	4478	2819	0	4274	4274	1	0	0	0	0
357	2926	2194	1	0.25	1	W	W	1	1927	1950	23	2819	4478	0	4274	4274	1	0	0	0	0
358	2077	2807	2	0	1	W	W	1	1945	1948	3	3953	4478	0	3956	2818	0	1	1	3	1
358	2807	2077	2	0	1	W	W	1	1948	1945	3	4478	3953	0	2818	3956	0	1	1	3	1
359	2081	2811	1	0	1	W	W	1	1920	1954	34	3953	4478	0	4176	2818	0	0	0	0	0
359	2811	2081	1	0	1	W	W	1	1954	1920	34	4478	3953	0	2818	4176	0	0	0	0	0
360	2077	2806	1	0	1	W	W	1	1945	1942	3	3953	4478	0	3956	2818	0	1	0	0	1
360	2806	2077	1	0	1	W	W	1	1942	1945	3	4478	3953	0	2818	3956	0	0	0	0	1
361	2081	2809	1	0	1	W	W	1	1920	1950	30	3953	4478	0	4176	2818	0	0	0	0	0
361	2809	2081	1	0	1	W	W	1	1950	1920	30	4478	3953	0	2818	4176	0	0	0	0	0
362	2083	2811	1	0	1	W	W	1	1944	1954	10	3953	4478	0	3178	2818	0	0	0	0	0
362	2811	2083	1	0	1	W	W	1	1954	1944	10	4478	3953	0	2818	3178	0	0	0	0	0
363	2057	2783	1	0	1	W	W	1	1951	1933	18	3586	4478	0	3956	2818	0	0	0	0	0
363	2783	2057	1	0	1	W	W	1	1933	1951	18	4478	3586	0	2818	3956	0	0	0	0	0
364	2081	2807	2	0	1	W	W	1	1920	1948	28	3953	4478	0	4176	2818	0	0	0	0	0
364	2807	2081	2	0	1	W	W	1	1948	1920	28	4478	3953	0	2818	4176	0	0	0	0	0
365	2083	2809	1	0	1	W	W	1	1944	1950	6	3953	4478	0	3178	2818	0	0	0	0	0
365	2809	2083	1	0	1	W	W	1	1950	1944	6	4478	3953	0	2818	3178	0	0	0	0	0
366	2085	2811	1	0	1	W	W	1	1949	1954	5	3953	4478	0	3178	2818	0	0	0	0	0
366	2811	2085	1	0	1	W	W	1	1954	1949	5	4478	3953	0	2818	3178	0	0	0	0	0
367	2081	2806	1	0	1	W	W	1	1920	1942	22	3953	4478	0	4176	2818	0	0	0	0	0
367	2806	2081	1	0	1	W	W	1	1942	1920	22	4478	3953	0	2818	4176	0	0	0	0	0
368	2194	2919	1	0.1875	1	W	W	1	1950	1953	3	4478	4478	1	4274	2818	0	0	0	0	0
368	2919	2194	1	0.1875	1	W	W	1	1953	1950	3	4478	4478	1	2818	4274	0	0	0	0	0
369	2083	2807	5	0	1	W	W	1	1944	1948	4	3953	4478	0	3178	2818	0	0	0	0	0
369	2807	2083	5	0	1	W	W	1	1948	1944	4	4478	3953	0	2818	3178	0	0	0	0	0
370	2085	2809	1	0	1	W	W	1	1949	1950	1	3953	4478	0	3178	2818	0	0	0	0	0
370	2809	2085	1	0	1	W	W	1	1950	1949	1	4478	3953	0	2818	3178	0	0	0	0	0
371	2148	2872	1	0	1	G	G	1	1927	1916	11	2145	2857	0	3178	5143	0	0	0	0	0
371	2872	2148	1	0	1	G	G	1	1916	1927	11	2857	2145	0	5143	3178	0	0	0	0	0
372	2194	2918	1	0.1875	1	W	W	1	1950	1945	5	4478	4478	1	4274	2818	0	0	0	0	0
372	2918	2194	1	0.1875	1	W	W	1	1945	1950	5	4478	4478	1	2818	4274	0	0	0	0	0
373	2083	2806	3	0	1	W	W	1	1944	1942	2	3953	4478	0	3178	2818	0	0	0	0	0
373	2806	2083	3	0	1	W	W	1	1942	1944	2	4478	3953	0	2818	3178	0	0	0	0	0
374	2194	2917	1	0.1875	1	W	W	1	1950	1934	16	4478	4478	1	4274	2818	0	0	0	0	0
374	2917	2194	1	0.1875	1	W	W	1	1934	1950	16	4478	4478	1	2818	4274	0	0	0	0	0
375	2085	2807	3	0	1	W	W	1	1949	1948	1	3953	4478	0	3178	2818	0	0	0	0	0
375	2807	2085	3	0	1	W	W	1	1948	1949	1	4478	3953	0	2818	3178	0	0	0	0	0
376	2194	2916	1	0.1875	1	W	W	1	1950	1930	20	4478	4478	1	4274	2818	0	0	0	0	0
376	2916	2194	1	0.1875	1	W	W	1	1930	1950	20	4478	4478	1	2818	4274	0	0	0	0	0
377	2070	2791	1	0.5	1	W	W	1	1900	1936	36	3953	3953	1	3954	3956	0	0	0	0	0
377	2791	2070	1	0.5	1	W	W	1	1936	1900	36	3953	3953	1	3956	3954	0	0	0	0	0
378	2085	2806	2	0	1	W	W	1	1949	1942	7	3953	4478	0	3178	2818	0	0	0	0	0
378	2806	2085	2	0	1	W	W	1	1942	1949	7	4478	3953	0	2818	3178	0	0	0	0	0
379	2086	2807	1	0	1	W	W	1	1956	1948	8	3953	4478	0	3178	2818	0	0	0	0	0
379	2807	2086	1	0	1	W	W	1	1948	1956	8	4478	3953	0	2818	3178	0	0	0	0	0
380	2081	2801	1	0	1	W	W	1	1920	1913	7	3953	4478	0	4176	2815	0	0	0	0	0
380	2801	2081	1	0	1	W	W	1	1913	1920	7	4478	3953	0	2815	4176	0	0	0	0	0
381	2070	2787	1	0	0	W	W	1	1900	1888	12	3953	4478	0	3954	4479	0	0	0	0	0
381	2787	2070	1	0	0	W	W	1	1888	1900	12	4478	3953	0	4479	3954	0	0	0	0	0
382	2328	3045	1	0.0625	1	W	W	1	1918	1945	27	4161	3586	0	3178	3956	0	0	0	0	0
382	3045	2328	1	0.0625	1	W	W	1	1945	1918	27	3586	4161	0	3956	3178	0	0	0	0	0
383	2076	2791	1	0.5	1	W	W	1	1936	1936	0	3953	3953	1	3956	3956	1	0	0	0	0
383	2791	2076	1	0.5	1	W	W	1	1936	1936	0	3953	3953	1	3956	3956	1	0	0	0	0
384	2070	2784	1	0	0	W	G	0	1900	1896	4	3953	3566	0	3954	3565	0	0	0	0	0
384	2784	2070	1	0	0	G	W	0	1896	1900	4	3566	3953	0	3565	3954	0	0	0	0	0
386	2081	2791	2	0.125	1	W	W	1	1920	1936	16	3953	3953	1	4176	3956	0	0	0	0	0
386	2791	2081	2	0.125	1	W	W	1	1936	1920	16	3953	3953	1	3956	4176	0	0	0	0	0
387	2099	2807	1	0	1	P	W	0	1946	1948	2	2312	4478	0	3564	2818	0	0	0	0	0
387	2807	2099	1	0	1	W	P	0	1948	1946	2	4478	2312	0	2818	3564	0	0	0	0	0
388	2040	2747	3	0	1	W	P	0	1939	1928	11	3586	2312	0	3956	3564	0	0	0	0	0
388	2747	2040	3	0	1	P	W	0	1928	1939	11	2312	3586	0	3564	3956	0	0	0	0	0
389	2040	2746	1	0.0078125	1	W	P	0	1939	1950	11	3586	2312	0	3956	3954	0	0	0	0	0
389	2746	2040	1	0.0078125	1	P	W	0	1950	1939	11	2312	3586	0	3954	3956	0	0	0	0	0
390	2077	2783	1	0	1	W	W	1	1945	1933	12	3953	4478	0	3956	2818	0	0	0	0	0
390	2783	2077	1	0	1	W	W	1	1933	1945	12	4478	3953	0	2818	3956	0	0	0	0	0
391	2211	2916	1	0	1	G	W	0	1910	1930	20	4271	4478	0	3727	2818	0	0	0	0	0
391	2916	2211	1	0	1	W	G	0	1930	1910	20	4478	4271	0	2818	3727	0	0	0	0	0
392	2040	2743	1	0.015625	1	W	P	0	1939	1934	5	3586	3563	0	3956	3954	0	0	0	0	0
392	2743	2040	1	0.015625	1	P	W	0	1934	1939	5	3563	3586	0	3954	3956	0	0	0	0	0
393	2081	2783	1	0	1	W	W	1	1920	1933	13	3953	4478	0	4176	2818	0	0	0	0	0
393	2783	2081	1	0	1	W	W	1	1933	1920	13	4478	3953	0	2818	4176	0	0	0	0	0
394	2046	2747	1	0	1	W	P	0	1927	1928	1	3586	2312	0	3178	3564	0	0	0	0	0
394	2747	2046	1	0	1	P	W	0	1928	1927	1	2312	3586	0	3564	3178	0	0	0	0	0
395	2046	2746	1	0	1	W	P	0	1927	1950	23	3586	2312	0	3178	3954	0	0	0	0	0
395	2746	2046	1	0	1	P	W	0	1950	1927	23	2312	3586	0	3954	3178	0	0	0	0	0
396	2083	2783	1	0	1	W	W	1	1944	1933	11	3953	4478	0	3178	2818	0	0	0	0	0
396	2783	2083	1	0	1	W	W	1	1933	1944	11	4478	3953	0	2818	3178	0	0	0	0	0
397	2172	2872	2	0.25	1	G	G	1	1936	1916	20	4271	2857	0	5143	5143	1	0	0	0	0
397	2872	2172	2	0.25	1	G	G	1	1916	1936	20	2857	4271	0	5143	5143	1	0	0	0	0
398	2085	2783	1	0	1	W	W	1	1949	1933	16	3953	4478	0	3178	2818	0	0	0	0	0
398	2783	2085	1	0	1	W	W	1	1933	1949	16	4478	3953	0	2818	3178	0	0	0	0	0
399	2040	2737	2	0	0	W	P	0	1939	1905	34	3586	3563	0	3956	4143	0	0	0	0	0
399	2737	2040	2	0	0	P	W	0	1905	1939	34	3563	3586	0	4143	3956	0	0	0	0	0
400	2050	2747	1	0	1	W	P	0	1948	1928	20	3586	2312	0	3956	3564	0	0	0	0	0
400	2747	2050	1	0	1	P	W	0	1928	1948	20	2312	3586	0	3564	3956	0	0	0	0	0
401	2125	2822	3	0	1	P	G	0	1912	1915	3	2312	3814	0	2123	5156	0	0	0	0	0
401	2822	2125	3	0	1	G	P	0	1915	1912	3	3814	2312	0	5156	2123	0	0	0	0	0
402	2050	2746	1	0.0078125	1	W	P	0	1948	1950	2	3586	2312	0	3956	3954	0	0	0	0	0
402	2746	2050	1	0.0078125	1	P	W	0	1950	1948	2	2312	3586	0	3954	3956	0	0	0	0	0
403	2088	2784	3	0	0	P	G	0	1916	1896	20	2312	3566	0	2123	3565	0	0	0	0	0
403	2784	2088	3	0	0	G	P	0	1896	1916	20	3566	2312	0	3565	2123	0	0	0	0	0
404	2157	2852	1	0.34375	1	P	W	0	1941	1946	5	3022	3022	1	2123	2123	1	0	0	0	0
404	2852	2157	1	0.34375	1	W	P	0	1946	1941	5	3022	3022	1	2123	2123	1	0	0	0	0
405	2172	2866	1	0	1	G	G	1	1936	1935	1	4271	3712	0	5143	3711	0	0	0	0	0
405	2866	2172	1	0	1	G	G	1	1935	1936	1	3712	4271	0	3711	5143	0	0	0	0	0
406	2046	2737	1	0	0	W	P	0	1927	1905	22	3586	3563	0	3178	4143	0	0	0	0	0
406	2737	2046	1	0	0	P	W	0	1905	1927	22	3563	3586	0	4143	3178	0	0	0	0	0
407	2120	2809	1	0	1	P	W	0	1946	1950	4	2312	4478	0	3564	2818	0	0	0	0	0
407	2809	2120	1	0	1	W	P	0	1950	1946	4	4478	2312	0	2818	3564	0	0	0	0	0
408	2050	2737	1	0	0	W	P	0	1948	1905	43	3586	3563	0	3956	4143	0	0	0	0	0
408	2737	2050	1	0	0	P	W	0	1905	1948	43	3563	3586	0	4143	3956	0	0	0	0	0
409	2120	2807	1	0	1	P	W	0	1946	1948	2	2312	4478	0	3564	2818	0	0	0	0	0
409	2807	2120	1	0	1	W	P	0	1948	1946	2	4478	2312	0	2818	3564	0	0	0	0	0
410	2135	2822	2	0	1	P	G	0	1911	1915	4	2312	3814	0	3178	5156	0	0	0	0	0
410	2822	2135	2	0	1	G	P	0	1915	1911	4	3814	2312	0	5156	3178	0	0	0	0	0
412	2057	2737	1	0	0	W	P	0	1951	1905	46	3586	3563	0	3956	4143	0	0	0	0	0
412	2737	2057	1	0	0	P	W	0	1905	1951	46	3563	3586	0	4143	3956	0	0	0	0	0
413	2070	2747	1	0	0	W	P	0	1900	1928	28	3953	2312	0	3954	3564	0	0	0	0	0
413	2747	2070	1	0	0	P	W	0	1928	1900	28	2312	3953	0	3564	3954	0	0	0	0	0
414	2146	2822	1	0	0	P	G	0	1912	1915	3	2145	3814	0	2144	5156	0	0	0	0	0
414	2822	2146	1	0	0	G	P	0	1915	1912	3	3814	2145	0	5156	2144	0	0	0	0	0
415	2148	2822	1	0	1	G	G	1	1927	1915	12	2145	3814	0	3178	5156	0	0	0	0	0
415	2822	2148	1	0	1	G	G	1	1915	1927	12	3814	2145	0	5156	3178	0	0	0	0	0
416	2149	2822	1	0	1	P	G	0	1930	1915	15	2145	3814	0	3178	5156	0	0	0	0	0
416	2822	2149	1	0	1	G	P	0	1915	1930	15	3814	2145	0	5156	3178	0	0	0	0	0
417	2172	2844	1	0.25	1	G	G	1	1936	1911	25	4271	2857	0	5143	5143	1	0	0	0	0
417	2844	2172	1	0.25	1	G	G	1	1911	1936	25	2857	4271	0	5143	5143	1	0	0	0	0
418	2153	2822	1	0	1	P	G	0	1936	1915	21	2145	3814	0	3178	5156	0	0	0	0	0
418	2822	2153	1	0	1	G	P	0	1915	1936	21	3814	2145	0	5156	3178	0	0	0	0	0
419	3088	3757	1	0.03125	1	W	W	1	1948	1957	9	4394	4161	0	3178	4274	0	0	0	0	0
419	3757	3088	1	0.03125	1	W	W	1	1957	1948	9	4161	4394	0	4274	3178	0	0	0	0	0
420	3768	4437	3	0	1	G	P	0	1913	1914	1	5142	3460	0	3766	3178	0	0	0	0	0
420	4437	3768	3	0	1	P	G	0	1914	1913	1	3460	5142	0	3178	3766	0	0	0	0	0
421	3100	3768	1	0	1	G	G	1	1933	1913	20	3463	5142	0	3178	3766	0	0	0	0	0
421	3768	3100	1	0	1	G	G	1	1913	1933	20	5142	3463	0	3766	3178	0	0	0	0	0
422	3769	4437	3	0	1	G	P	0	1916	1914	2	5142	3460	0	3766	3178	0	0	0	0	0
422	4437	3769	3	0	1	P	G	0	1914	1916	2	3460	5142	0	3178	3766	0	0	0	0	0
423	2070	2737	2	0	0	W	P	0	1900	1905	5	3953	3563	0	3954	4143	0	0	0	0	0
423	2737	2070	2	0	0	P	W	0	1905	1900	5	3563	3953	0	4143	3954	0	0	0	0	0
424	3090	3757	1	0.03125	1	W	W	1	1955	1957	2	4394	4161	0	3178	4274	0	1	0	0	1
424	3757	3090	1	0.03125	1	W	W	1	1957	1955	2	4161	4394	0	4274	3178	0	0	0	0	1
425	2158	2822	1	0	1	B	G	0	1926	1915	11	2312	3814	0	2123	5156	0	1	0	0	1
425	2822	2158	1	0	1	G	B	0	1915	1926	11	3814	2312	0	5156	2123	0	0	0	0	1
426	2172	2836	1	0	1	G	G	1	1936	1932	4	4271	3712	0	5143	3711	0	0	0	0	0
426	2836	2172	1	0	1	G	G	1	1932	1936	4	3712	4271	0	3711	5143	0	0	0	0	0
427	2426	3090	1	0.125	1	W	W	1	1942	1955	13	3953	4394	0	3178	3178	1	0	0	0	0
427	3090	2426	1	0.125	1	W	W	1	1955	1942	13	4394	3953	0	3178	3178	1	0	0	0	0
428	2159	2822	3	0	0	B	G	0	1892	1915	23	2312	3814	0	2313	5156	0	0	1	1	1
428	2822	2159	3	0	0	G	B	0	1915	1892	23	3814	2312	0	5156	2313	0	0	1	1	1
429	2426	3088	4	0.125	1	W	W	1	1942	1948	6	3953	4394	0	3178	3178	1	0	0	0	0
429	3088	2426	4	0.125	1	W	W	1	1948	1942	6	4394	3953	0	3178	3178	1	0	0	0	0
430	2211	2872	2	0	1	G	G	1	1910	1916	6	4271	2857	0	3727	5143	0	1	1	1	1
430	2872	2211	2	0	1	G	G	1	1916	1910	6	2857	4271	0	5143	3727	0	0	1	1	1
431	2077	2737	1	0	0	W	P	0	1945	1905	40	3953	3563	0	3956	4143	0	0	0	0	0
431	2737	2077	1	0	0	P	W	0	1905	1945	40	3563	3953	0	4143	3956	0	0	0	0	0
432	2266	2926	1	0	0	P	W	0	1908	1927	19	3022	2819	0	3023	4274	0	0	0	0	0
432	2926	2266	1	0	0	W	P	0	1927	1908	19	2819	3022	0	4274	3023	0	0	0	0	0
433	2040	2699	2	0.015625	1	W	P	0	1939	1937	2	3586	3563	0	3956	3954	0	0	0	0	0
433	2699	2040	2	0.015625	1	P	W	0	1937	1939	2	3563	3586	0	3954	3956	0	0	0	0	0
434	2088	2747	3	0.5	1	P	P	1	1916	1928	12	2312	2312	1	2123	3564	0	0	0	0	0
434	2747	2088	3	0.5	1	P	P	1	1928	1916	12	2312	2312	1	3564	2123	0	0	0	0	0
435	2125	2784	3	0	0	P	G	0	1912	1896	16	2312	3566	0	2123	3565	0	0	0	0	0
435	2784	2125	3	0	0	G	P	0	1896	1912	16	3566	2312	0	3565	2123	0	0	0	0	0
436	2426	3085	4	0	0	W	W	1	1942	1913	29	3953	4394	0	3178	4395	0	0	0	0	0
436	3085	2426	4	0	0	W	W	1	1913	1942	29	4394	3953	0	4395	3178	0	0	0	0	0
437	2426	3084	2	0.125	1	W	W	1	1942	1939	3	3953	4159	0	3178	3178	1	0	0	0	0
437	3084	2426	2	0.125	1	W	W	1	1939	1942	3	4159	3953	0	3178	3178	1	0	0	0	0
438	2081	2737	1	0	0	W	P	0	1920	1905	15	3953	3563	0	4176	4143	0	0	0	0	0
438	2737	2081	1	0	0	P	W	0	1905	1920	15	3563	3953	0	4143	4176	0	0	0	0	0
439	2091	2747	1	0.375	1	P	P	1	1940	1928	12	2312	2312	1	3564	3564	1	0	0	0	0
439	2747	2091	1	0.375	1	P	P	1	1928	1940	12	2312	2312	1	3564	3564	1	0	0	0	0
440	2088	2743	3	0.0625	1	P	P	1	1916	1934	18	2312	3563	0	2123	3954	0	0	0	0	0
440	2743	2088	3	0.0625	1	P	P	1	1934	1916	18	3563	2312	0	3954	2123	0	0	0	0	0
441	2092	2747	2	0.375	1	W	P	0	1939	1928	11	2312	2312	1	3564	3564	1	0	0	0	0
441	2747	2092	2	0.375	1	P	W	0	1928	1939	11	2312	2312	1	3564	3564	1	0	0	0	0
442	2083	2737	1	0	0	W	P	0	1944	1905	39	3953	3563	0	3178	4143	0	0	0	0	0
442	2737	2083	1	0	0	P	W	0	1905	1944	39	3563	3953	0	4143	3178	0	0	0	0	0
443	2092	2746	1	0.234375	1	W	P	0	1939	1950	11	2312	2312	1	3564	3954	0	0	0	0	0
443	2746	2092	1	0.234375	1	P	W	0	1950	1939	11	2312	2312	1	3954	3564	0	0	0	0	0
444	2556	3210	1	0	1	W	W	1	1940	1960	20	3953	4478	0	3178	2818	0	0	0	0	0
444	3210	2556	1	0	1	W	W	1	1960	1940	20	4478	3953	0	2818	3178	0	0	0	0	0
445	2046	2699	1	0	1	W	P	0	1927	1937	10	3586	3563	0	3178	3954	0	0	0	0	0
445	2699	2046	1	0	1	P	W	0	1937	1927	10	3563	3586	0	3954	3178	0	0	0	0	0
446	2085	2737	1	0	0	W	P	0	1949	1905	44	3953	3563	0	3178	4143	0	0	0	0	0
446	2737	2085	1	0	0	P	W	0	1905	1949	44	3563	3953	0	4143	3178	0	0	0	0	0
447	2157	2809	1	0	1	P	W	0	1941	1950	9	3022	4478	0	2123	2818	0	0	0	0	0
447	2809	2157	1	0	1	W	P	0	1950	1941	9	4478	3022	0	2818	2123	0	0	0	0	0
448	2556	3208	1	0	1	W	W	1	1940	1954	14	3953	4478	0	3178	2818	0	0	0	0	0
448	3208	2556	1	0	1	W	W	1	1954	1940	14	4478	3953	0	2818	3178	0	0	0	0	0
449	3045	3696	1	0.0625	1	W	W	1	1945	1904	41	3586	3953	0	3956	4176	0	0	0	0	0
449	3696	3045	1	0.0625	1	W	W	1	1904	1945	41	3953	3586	0	4176	3956	0	0	0	0	0
450	2157	2807	1	0	1	P	W	0	1941	1948	7	3022	4478	0	2123	2818	0	0	0	0	0
450	2807	2157	1	0	1	W	P	0	1948	1941	7	4478	3022	0	2818	2123	0	0	0	0	0
451	2050	2699	1	0.015625	1	W	P	0	1948	1937	11	3586	3563	0	3956	3954	0	0	0	0	0
451	2699	2050	1	0.015625	1	P	W	0	1937	1948	11	3563	3586	0	3954	3956	0	0	0	0	0
452	2088	2737	6	0	0	P	P	1	1916	1905	11	2312	3563	0	2123	4143	0	1	1	6	1
452	2737	2088	6	0	0	P	P	1	1905	1916	11	3563	2312	0	4143	2123	0	0	1	6	1
453	2098	2747	1	0.15625	1	B	P	0	1944	1928	16	2312	2312	1	3564	3564	1	0	0	0	0
453	2747	2098	1	0.15625	1	P	B	0	1928	1944	16	2312	2312	1	3564	3564	1	0	0	0	0
454	2135	2784	1	0	0	P	G	0	1911	1896	15	2312	3566	0	3178	3565	0	0	0	0	0
454	2784	2135	1	0	0	G	P	0	1896	1911	15	3566	2312	0	3565	3178	0	0	0	0	0
455	2279	2926	2	0	1	P	W	0	1924	1927	3	2294	2819	0	2311	4274	0	0	0	0	0
455	2926	2279	2	0	1	W	P	0	1927	1924	3	2819	2294	0	4274	2311	0	0	0	0	0
456	2091	2737	1	0.125	1	P	P	1	1940	1905	35	2312	3563	0	3564	4143	0	1	0	0	1
456	2737	2091	1	0.125	1	P	P	1	1905	1940	35	3563	2312	0	4143	3564	0	0	0	0	1
457	2040	2685	1	0.015625	1	W	P	0	1939	1928	11	3586	3563	0	3956	3954	0	0	0	0	0
457	2685	2040	1	0.015625	1	P	W	0	1928	1939	11	3563	3586	0	3954	3956	0	0	0	0	0
458	2092	2737	2	0.125	1	W	P	0	1939	1905	34	2312	3563	0	3564	4143	0	0	0	0	0
458	2737	2092	2	0.125	1	P	W	0	1905	1939	34	3563	2312	0	4143	3564	0	0	0	0	0
459	2556	3200	1	0	1	W	W	1	1940	1956	16	3953	4478	0	3178	2818	0	0	0	0	0
459	3200	2556	1	0	1	W	W	1	1956	1940	16	4478	3953	0	2818	3178	0	0	0	0	0
460	3757	4401	1	0.25	1	W	W	1	1957	1951	6	4161	4161	1	4274	4395	0	0	0	0	0
460	4401	3757	1	0.25	1	W	W	1	1951	1957	6	4161	4161	1	4395	4274	0	0	0	0	0
461	2098	2737	2	0.125	1	B	P	0	1944	1905	39	2312	3563	0	3564	4143	0	0	0	0	0
461	2737	2098	2	0.125	1	P	B	0	1905	1944	39	3563	2312	0	4143	3564	0	0	0	0	0
462	2146	2784	2	0	0	P	G	0	1912	1896	16	2145	3566	0	2144	3565	0	0	1	2	1
462	2784	2146	2	0	0	G	P	0	1896	1912	16	3566	2145	0	3565	2144	0	0	1	2	1
463	2279	2917	1	0	1	P	W	0	1924	1934	10	2294	4478	0	2311	2818	0	0	0	0	0
463	2917	2279	1	0	1	W	P	0	1934	1924	10	4478	2294	0	2818	2311	0	0	0	0	0
464	2279	2916	1	0	1	P	W	0	1924	1930	6	2294	4478	0	2311	2818	0	0	0	0	0
464	2916	2279	1	0	1	W	P	0	1930	1924	6	4478	2294	0	2818	2311	0	0	0	0	0
465	2148	2784	3	0	0	G	G	1	1927	1896	31	2145	3566	0	3178	3565	0	1	0	0	1
465	2784	2148	3	0	0	G	G	1	1896	1927	31	3566	2145	0	3565	3178	0	0	0	0	1
466	2211	2844	3	0	1	G	G	1	1910	1911	1	4271	2857	0	3727	5143	0	1	0	0	1
466	2844	2211	3	0	1	G	G	1	1911	1910	1	2857	4271	0	5143	3727	0	0	0	0	1
467	2153	2784	2	0	0	P	G	0	1936	1896	40	2145	3566	0	3178	3565	0	1	0	0	1
467	2784	2153	2	0	0	G	P	0	1896	1936	40	3566	2145	0	3565	3178	0	0	0	0	1
468	2460	3090	1	0	1	W	W	1	1938	1955	17	4478	4394	0	2818	3178	0	0	0	0	0
468	3090	2460	1	0	1	W	W	1	1955	1938	17	4394	4478	0	3178	2818	0	0	0	0	0
469	2159	2787	1	0	0	B	W	0	1892	1888	4	2312	4478	0	2313	4479	0	0	0	0	0
469	2787	2159	1	0	0	W	B	0	1888	1892	4	4478	2312	0	4479	2313	0	0	0	0	0
470	2460	3088	3	0	1	W	W	1	1938	1948	10	4478	4394	0	2818	3178	0	0	0	0	0
470	3088	2460	3	0	1	W	W	1	1948	1938	10	4394	4478	0	3178	2818	0	0	0	0	0
471	2120	2747	3	0.5	1	P	P	1	1946	1928	18	2312	2312	1	3564	3564	1	0	0	0	0
471	2747	2120	3	0.5	1	P	P	1	1928	1946	18	2312	2312	1	3564	3564	1	0	0	0	0
472	2458	3085	1	0	0	W	W	1	1901	1913	12	3953	4394	0	4176	4395	0	0	0	0	0
472	3085	2458	1	0	0	W	W	1	1913	1901	12	4394	3953	0	4395	4176	0	0	0	0	0
473	2120	2746	2	0.296875	1	P	P	1	1946	1950	4	2312	2312	1	3564	3954	0	0	0	0	0
473	2746	2120	2	0.296875	1	P	P	1	1950	1946	4	2312	2312	1	3954	3564	0	0	0	0	0
474	2159	2784	3	0	0	B	G	0	1892	1896	4	2312	3566	0	2313	3565	0	0	0	0	0
474	2784	2159	3	0	0	G	B	0	1896	1892	4	3566	2312	0	3565	2313	0	0	0	0	0
475	2460	3085	1	0	0	W	W	1	1938	1913	25	4478	4394	0	2818	4395	0	0	0	0	0
475	3085	2460	1	0	0	W	W	1	1913	1938	25	4394	4478	0	4395	2818	0	0	0	0	0
476	2460	3084	1	0	1	W	W	1	1938	1939	1	4478	4159	0	2818	3178	0	0	0	0	0
476	3084	2460	1	0	1	W	W	1	1939	1938	1	4159	4478	0	3178	2818	0	0	0	0	0
477	2125	2747	4	0.25	1	P	P	1	1912	1928	16	2312	2312	1	2123	3564	0	0	0	0	0
477	2747	2125	4	0.25	1	P	P	0	1928	1912	16	2312	2312	1	3564	2123	0	0	0	0	0
478	2426	3045	2	0.15625	1	W	W	1	1942	1945	3	3953	3586	0	3178	3956	0	0	0	0	0
478	3045	2426	2	0.15625	1	W	W	1	1945	1942	3	3586	3953	0	3956	3178	0	0	0	0	0
480	2125	2743	3	0.0625	1	P	P	1	1912	1934	22	2312	3563	0	2123	3954	0	0	0	0	0
480	2743	2125	3	0.0625	1	P	P	0	1934	1912	22	3563	2312	0	3954	2123	0	0	0	0	0
481	2120	2737	2	0.125	1	P	P	1	1946	1905	41	2312	3563	0	3564	4143	0	1	0	0	1
481	2737	2120	2	0.125	1	P	P	1	1905	1946	41	3563	2312	0	4143	3564	0	0	0	0	1
482	2194	2811	1	0.1875	1	W	W	1	1950	1954	4	4478	4478	1	4274	2818	0	0	0	0	0
482	2811	2194	1	0.1875	1	W	W	1	1954	1950	4	4478	4478	1	2818	4274	0	0	0	0	0
483	2194	2809	1	0.1875	1	W	W	1	1950	1950	0	4478	4478	1	4274	2818	0	0	0	0	0
483	2809	2194	1	0.1875	1	W	W	1	1950	1950	0	4478	4478	1	2818	4274	0	0	0	0	0
484	2194	2807	1	0.1875	1	W	W	1	1950	1948	2	4478	4478	1	4274	2818	0	0	0	0	0
484	2807	2194	1	0.1875	1	W	W	1	1948	1950	2	4478	4478	1	2818	4274	0	0	0	0	0
485	2125	2737	6	0	0	P	P	1	1912	1905	7	2312	3563	0	2123	4143	0	0	1	3	1
485	2737	2125	6	0	0	P	P	0	1905	1912	7	3563	2312	0	4143	2123	0	0	1	3	1
486	2135	2747	3	0.0625	1	P	P	1	1911	1928	17	2312	2312	1	3178	3564	0	0	0	0	0
486	2747	2135	3	0.0625	1	P	P	1	1928	1911	17	2312	2312	1	3564	3178	0	0	0	0	0
487	2194	2806	1	0.1875	1	W	W	1	1950	1942	8	4478	4478	1	4274	2818	0	0	0	0	0
487	2806	2194	1	0.1875	1	W	W	1	1942	1950	8	4478	4478	1	2818	4274	0	0	0	0	0
488	3084	3696	1	0	1	W	W	1	1939	1904	35	4159	3953	0	3178	4176	0	0	0	0	0
488	3696	3084	1	0	1	W	W	1	1904	1939	35	3953	4159	0	4176	3178	0	0	0	0	0
489	2088	2699	4	0.0625	1	P	P	1	1916	1937	21	2312	3563	0	2123	3954	0	0	0	0	1
489	2699	2088	4	0.0625	1	P	P	1	1937	1916	21	3563	2312	0	3954	2123	0	1	0	0	1
490	2135	2746	1	0.09375	1	P	P	1	1911	1950	39	2312	2312	1	3178	3954	0	0	0	0	0
490	2746	2135	1	0.09375	1	P	P	1	1950	1911	39	2312	2312	1	3954	3178	0	0	0	0	0
491	2211	2822	1	0	1	G	G	1	1910	1915	5	4271	3814	0	3727	5156	0	0	0	0	0
491	2822	2211	1	0	1	G	G	1	1915	1910	5	3814	4271	0	5156	3727	0	0	0	0	0
492	3085	3696	5	0	0	W	W	1	1913	1904	9	4394	3953	0	4395	4176	0	0	0	0	0
492	3696	3085	5	0	0	W	W	1	1904	1913	9	3953	4394	0	4176	4395	0	0	0	0	0
493	2091	2699	1	0.09375	1	P	P	1	1940	1937	3	2312	3563	0	3564	3954	0	1	1	1	1
493	2699	2091	1	0.09375	1	P	P	1	1937	1940	3	3563	2312	0	3954	3564	0	1	1	1	1
494	2135	2743	3	0.125	1	P	P	1	1911	1934	23	2312	3563	0	3178	3954	0	0	0	0	0
494	2743	2135	3	0.125	1	P	P	1	1934	1911	23	3563	2312	0	3954	3178	0	0	0	0	0
495	3088	3696	1	0	1	W	W	1	1948	1904	44	4394	3953	0	3178	4176	0	0	0	0	0
495	3696	3088	1	0	1	W	W	1	1904	1948	44	3953	4394	0	4176	3178	0	0	0	0	0
496	2092	2699	1	0.09375	1	W	P	0	1939	1937	2	2312	3563	0	3564	3954	0	0	1	1	1
496	2699	2092	1	0.09375	1	P	W	0	1937	1939	2	3563	2312	0	3954	3564	0	1	1	1	1
497	2135	2737	5	0	0	P	P	1	1911	1905	6	2312	3563	0	3178	4143	0	1	0	0	1
497	2737	2135	5	0	0	P	P	1	1905	1911	6	3563	2312	0	4143	3178	0	1	0	0	1
498	2098	2699	2	0.125	1	B	P	0	1944	1937	7	2312	3563	0	3564	3954	0	0	1	1	1
498	2699	2098	2	0.125	1	P	B	0	1937	1944	7	3563	2312	0	3954	3564	0	0	1	1	1
499	2146	2747	1	0	0	P	P	1	1912	1928	16	2145	2312	0	2144	3564	0	0	0	0	0
499	2747	2146	1	0	0	P	P	1	1928	1912	16	2312	2145	0	3564	2144	0	0	0	0	0
500	2148	2747	1	0	1	G	P	0	1927	1928	1	2145	2312	0	3178	3564	0	0	0	0	0
500	2747	2148	1	0	1	P	G	0	1928	1927	1	2312	2145	0	3564	3178	0	0	0	0	0
501	2149	2747	1	0	1	P	P	1	1930	1928	2	2145	2312	0	3178	3564	0	0	0	0	0
501	2747	2149	1	0	1	P	P	1	1928	1930	2	2312	2145	0	3564	3178	0	0	0	0	0
502	2328	2926	2	0	1	W	W	1	1918	1927	9	4161	2819	0	3178	4274	0	0	0	0	0
502	2926	2328	2	0	1	W	W	1	1927	1918	9	2819	4161	0	4274	3178	0	0	0	0	0
503	2088	2685	7	0.0625	1	P	P	1	1916	1928	12	2312	3563	0	2123	3954	0	0	0	0	1
503	2685	2088	7	0.0625	1	P	P	1	1928	1916	12	3563	2312	0	3954	2123	0	1	0	0	1
504	2146	2743	2	0	0	P	P	1	1912	1934	22	2145	3563	0	2144	3954	0	0	0	0	0
504	2743	2146	2	0	0	P	P	1	1934	1912	22	3563	2145	0	3954	2144	0	0	0	0	0
505	2148	2743	1	0	1	G	P	0	1927	1934	7	2145	3563	0	3178	3954	0	0	0	0	0
505	2743	2148	1	0	1	P	G	0	1934	1927	7	3563	2145	0	3954	3178	0	0	0	0	0
506	2091	2685	1	0.09375	1	P	P	1	1940	1928	12	2312	3563	0	3564	3954	0	1	0	0	1
506	2685	2091	1	0.09375	1	P	P	1	1928	1940	12	3563	2312	0	3954	3564	0	1	0	0	1
507	2153	2747	2	0	1	P	P	1	1936	1928	8	2145	2312	0	3178	3564	0	0	0	0	0
507	2747	2153	2	0	1	P	P	1	1928	1936	8	2312	2145	0	3564	3178	0	0	0	0	0
508	2092	2685	2	0.09375	1	W	P	0	1939	1928	11	2312	3563	0	3564	3954	0	0	0	0	1
508	2685	2092	2	0.09375	1	P	W	0	1928	1939	11	3563	2312	0	3954	3564	0	1	0	0	1
509	2040	2631	2	0.015625	1	W	P	0	1939	1923	16	3586	3563	0	3956	3954	0	0	0	0	0
509	2631	2040	2	0.015625	1	P	W	0	1923	1939	16	3563	3586	0	3954	3956	0	0	0	0	0
510	2146	2737	4	0	0	P	P	1	1912	1905	7	2145	3563	0	2144	4143	0	0	0	0	0
510	2737	2146	4	0	0	P	P	1	1905	1912	7	3563	2145	0	4143	2144	0	0	0	0	0
511	2328	2919	1	0	1	W	W	1	1918	1953	35	4161	4478	0	3178	2818	0	1	0	0	1
511	2919	2328	1	0	1	W	W	1	1953	1918	35	4478	4161	0	2818	3178	0	0	0	0	1
512	2153	2743	2	0	1	P	P	1	1936	1934	2	2145	3563	0	3178	3954	0	0	0	0	0
512	2743	2153	2	0	1	P	P	1	1934	1936	2	3563	2145	0	3954	3178	0	0	0	0	0
513	2157	2747	2	0.125	1	P	P	1	1941	1928	13	3022	2312	0	2123	3564	0	1	0	0	1
513	2747	2157	2	0.125	1	P	P	1	1928	1941	13	2312	3022	0	3564	2123	0	0	0	0	1
514	2328	2918	3	0	1	W	W	1	1918	1945	27	4161	4478	0	3178	2818	0	1	0	0	1
514	2918	2328	3	0	1	W	W	1	1945	1918	27	4478	4161	0	2818	3178	0	0	0	0	1
515	2148	2737	1	0	0	G	P	0	1927	1905	22	2145	3563	0	3178	4143	0	0	0	0	0
515	2737	2148	1	0	0	P	G	0	1905	1927	22	3563	2145	0	4143	3178	0	0	0	0	0
516	2157	2746	1	0.078125	1	P	P	1	1941	1950	9	3022	2312	0	2123	3954	0	0	0	0	0
516	2746	2157	1	0.078125	1	P	P	1	1950	1941	9	2312	3022	0	3954	2123	0	0	0	0	0
517	2158	2747	1	0.125	1	B	P	0	1926	1928	2	2312	2312	1	2123	3564	0	0	0	0	0
517	2747	2158	1	0.125	1	P	B	0	1928	1926	2	2312	2312	1	3564	2123	0	0	0	0	0
518	2194	2783	1	0.5	1	W	W	1	1950	1933	17	4478	4478	1	4274	2818	0	0	0	0	0
518	2783	2194	1	0.5	1	W	W	1	1933	1950	17	4478	4478	1	2818	4274	0	0	0	0	0
519	2328	2917	2	0	1	W	W	1	1918	1934	16	4161	4478	0	3178	2818	0	1	0	0	1
519	2917	2328	2	0	1	W	W	1	1934	1918	16	4478	4161	0	2818	3178	0	0	0	0	1
520	2159	2747	2	0.125	1	B	P	0	1892	1928	36	2312	2312	1	2313	3564	0	0	0	0	0
520	2747	2159	2	0.125	1	P	B	0	1928	1892	36	2312	2312	1	3564	2313	0	0	0	0	0
521	2328	2916	3	0	1	W	W	1	1918	1930	12	4161	4478	0	3178	2818	0	1	0	0	1
521	2916	2328	3	0	1	W	W	1	1930	1918	12	4478	4161	0	2818	3178	0	0	0	0	1
522	2098	2685	2	0.125	1	B	P	0	1944	1928	16	2312	3563	0	3564	3954	0	0	0	0	0
522	2685	2098	2	0.125	1	P	B	0	1928	1944	16	3563	2312	0	3954	3564	0	0	0	0	0
523	2046	2631	1	0	1	W	P	0	1927	1923	4	3586	3563	0	3178	3954	0	0	0	0	0
523	2631	2046	1	0	1	P	W	0	1923	1927	4	3563	3586	0	3954	3178	0	0	0	0	0
524	2460	3045	1	0	1	W	W	1	1938	1945	7	4478	3586	0	2818	3956	0	0	0	0	0
524	3045	2460	1	0	1	W	W	1	1945	1938	7	3586	4478	0	3956	2818	0	0	0	0	0
525	2153	2737	1	0	0	P	P	1	1936	1905	31	2145	3563	0	3178	4143	0	0	0	0	0
525	2737	2153	1	0	0	P	P	1	1905	1936	31	3563	2145	0	4143	3178	0	0	0	0	0
526	2159	2743	3	0.25	1	B	P	0	1892	1934	42	2312	3563	0	2313	3954	0	0	0	0	0
526	2743	2159	3	0.25	1	P	B	0	1934	1892	42	3563	2312	0	3954	2313	0	0	0	0	0
527	2050	2631	1	0.015625	1	W	P	0	1948	1923	25	3586	3563	0	3956	3954	0	0	0	0	0
527	2631	2050	1	0.015625	1	P	W	0	1923	1948	25	3563	3586	0	3954	3956	0	0	0	0	0
528	2157	2737	1	0	0	P	P	1	1941	1905	36	3022	3563	0	2123	4143	0	0	0	0	0
528	2737	2157	1	0	0	P	P	1	1905	1941	36	3563	3022	0	4143	2123	0	0	0	0	0
529	2120	2699	2	0.09375	1	P	P	1	1946	1937	9	2312	3563	0	3564	3954	0	1	1	1	1
529	2699	2120	2	0.09375	1	P	P	1	1937	1946	9	3563	2312	0	3954	3564	0	1	1	1	1
530	2159	2737	6	0	0	B	P	0	1892	1905	13	2312	3563	0	2313	4143	0	0	0	0	1
530	2737	2159	6	0	0	P	B	0	1905	1892	13	3563	2312	0	4143	2313	0	1	0	0	1
531	2125	2699	4	0.0625	1	P	P	1	1912	1937	25	2312	3563	0	2123	3954	0	0	0	0	1
531	2699	2125	4	0.0625	1	P	P	0	1937	1912	25	3563	2312	0	3954	2123	0	1	0	0	1
532	2279	2852	1	0	1	P	W	0	1924	1946	22	2294	3022	0	2311	2123	0	0	0	0	0
532	2852	2279	1	0	1	W	P	0	1946	1924	22	3022	2294	0	2123	2311	0	0	0	0	0
533	2631	3200	1	0	1	P	W	0	1923	1956	33	3563	4478	0	3954	2818	0	0	0	0	0
533	3200	2631	1	0	1	W	P	0	1956	1923	33	4478	3563	0	2818	3954	0	0	0	0	0
534	2120	2685	2	0.09375	1	P	P	1	1946	1928	18	2312	3563	0	3564	3954	0	1	0	0	1
534	2685	2120	2	0.09375	1	P	P	1	1928	1946	18	3563	2312	0	3954	3564	0	1	0	0	1
535	2135	2699	2	0.125	1	P	P	1	1911	1937	26	2312	3563	0	3178	3954	0	0	0	0	0
535	2699	2135	2	0.125	1	P	P	1	1937	1911	26	3563	2312	0	3954	3178	0	0	0	0	0
536	2125	2685	7	0.0625	1	P	P	1	1912	1928	16	2312	3563	0	2123	3954	0	0	0	0	0
536	2685	2125	7	0.0625	1	P	P	0	1928	1912	16	3563	2312	0	3954	2123	0	0	0	0	0
537	2266	2822	1	0	0	P	G	0	1908	1915	7	3022	3814	0	3023	5156	0	0	0	0	0
537	2822	2266	1	0	0	G	P	0	1915	1908	7	3814	3022	0	5156	3023	0	0	0	0	0
538	2148	2699	1	0	1	G	P	0	1927	1937	10	2145	3563	0	3178	3954	0	0	0	0	0
538	2699	2148	1	0	1	P	G	0	1937	1927	10	3563	2145	0	3954	3178	0	0	0	0	0
539	2135	2685	5	0.125	1	P	P	1	1911	1928	17	2312	3563	0	3178	3954	0	0	0	0	0
539	2685	2135	5	0.125	1	P	P	1	1928	1911	17	3563	2312	0	3954	3178	0	0	0	0	0
540	2149	2699	2	0	1	P	P	1	1930	1937	7	2145	3563	0	3178	3954	0	0	0	0	0
540	2699	2149	2	0	1	P	P	1	1937	1930	7	3563	2145	0	3954	3178	0	0	0	0	0
541	2153	2699	1	0	1	P	P	1	1936	1937	1	2145	3563	0	3178	3954	0	0	0	0	0
541	2699	2153	1	0	1	P	P	1	1937	1936	1	3563	2145	0	3954	3178	0	0	0	0	0
542	2543	3088	1	0.0625	1	W	W	1	1921	1948	27	4161	4394	0	3178	3178	1	0	0	0	0
542	3088	2543	1	0.0625	1	W	W	1	1948	1921	27	4394	4161	0	3178	3178	1	0	0	0	0
543	2088	2631	5	0.0625	1	P	P	1	1916	1923	7	2312	3563	0	2123	3954	0	0	0	0	1
543	2631	2088	5	0.0625	1	P	P	1	1923	1916	7	3563	2312	0	3954	2123	0	1	0	0	1
544	2194	2737	1	0	0	W	P	0	1950	1905	45	4478	3563	0	4274	4143	0	0	0	0	0
544	2737	2194	1	0	0	P	W	0	1905	1950	45	3563	4478	0	4143	4274	0	0	0	0	0
545	2279	2822	1	0	1	P	G	0	1924	1915	9	2294	3814	0	2311	5156	0	0	0	0	0
545	2822	2279	1	0	1	G	P	0	1915	1924	9	3814	2294	0	5156	2311	0	0	0	0	0
546	2157	2699	2	0.03125	1	P	P	1	1941	1937	4	3022	3563	0	2123	3954	0	0	0	0	0
546	2699	2157	2	0.03125	1	P	P	1	1937	1941	4	3563	3022	0	3954	2123	0	0	0	0	0
547	2543	3085	3	0	0	W	W	1	1921	1913	8	4161	4394	0	3178	4395	0	1	1	2	1
547	3085	2543	3	0	0	W	W	1	1913	1921	8	4394	4161	0	4395	3178	0	0	1	2	1
548	2158	2699	3	0.125	1	B	P	0	1926	1937	11	2312	3563	0	2123	3954	0	0	0	0	0
548	2699	2158	3	0.125	1	P	B	0	1937	1926	11	3563	2312	0	3954	2123	0	0	0	0	0
549	2543	3084	1	0.0625	1	W	W	1	1921	1939	18	4161	4159	0	3178	3178	1	0	0	0	0
549	3084	2543	1	0.0625	1	W	W	1	1939	1921	18	4159	4161	0	3178	3178	1	0	0	0	0
550	2091	2631	1	0.09375	1	P	P	1	1940	1923	17	2312	3563	0	3564	3954	0	1	0	0	1
550	2631	2091	1	0.09375	1	P	P	1	1923	1940	17	3563	2312	0	3954	3564	0	1	0	0	1
551	2159	2699	2	0.25	1	B	P	0	1892	1937	45	2312	3563	0	2313	3954	0	0	0	0	0
551	2699	2159	2	0.25	1	P	B	0	1937	1892	45	3563	2312	0	3954	2313	0	0	0	0	0
552	2092	2631	1	0.09375	1	W	P	0	1939	1923	16	2312	3563	0	3564	3954	0	0	0	0	1
552	2631	2092	1	0.09375	1	P	W	0	1923	1939	16	3563	2312	0	3954	3564	0	1	0	0	1
553	2146	2685	3	0	0	P	P	1	1912	1928	16	2145	3563	0	2144	3954	0	0	0	0	0
553	2685	2146	3	0	0	P	P	1	1928	1912	16	3563	2145	0	3954	2144	0	0	0	0	0
554	2148	2685	2	0	1	G	P	0	1927	1928	1	2145	3563	0	3178	3954	0	0	0	0	0
554	2685	2148	2	0	1	P	G	0	1928	1927	1	3563	2145	0	3954	3178	0	0	0	0	0
555	2149	2685	1	0	1	P	P	1	1930	1928	2	2145	3563	0	3178	3954	0	0	0	0	0
555	2685	2149	1	0	1	P	P	1	1928	1930	2	3563	2145	0	3954	3178	0	0	0	0	0
556	2556	3090	1	0.125	1	W	W	1	1940	1955	15	3953	4394	0	3178	3178	1	0	0	0	0
556	3090	2556	1	0.125	1	W	W	1	1955	1940	15	4394	3953	0	3178	3178	1	0	0	0	0
557	2098	2631	2	0.125	1	B	P	0	1944	1923	21	2312	3563	0	3564	3954	0	0	0	0	0
557	2631	2098	2	0.125	1	P	B	0	1923	1944	21	3563	2312	0	3954	3564	0	0	0	0	0
558	2153	2685	1	0	1	P	P	1	1936	1928	8	2145	3563	0	3178	3954	0	0	0	0	0
558	2685	2153	1	0	1	P	P	1	1928	1936	8	3563	2145	0	3954	3178	0	0	0	0	0
559	2211	2743	1	0	1	G	P	0	1910	1934	24	4271	3563	0	3727	3954	0	0	0	0	0
559	2743	2211	1	0	1	P	G	0	1934	1910	24	3563	4271	0	3954	3727	0	0	0	0	0
560	2556	3088	5	0.125	1	W	W	1	1940	1948	8	3953	4394	0	3178	3178	1	0	0	0	0
560	3088	2556	5	0.125	1	W	W	1	1948	1940	8	4394	3953	0	3178	3178	1	0	0	0	0
562	2279	2809	1	0	1	P	W	0	1924	1950	26	2294	4478	0	2311	2818	0	0	0	0	0
562	2809	2279	1	0	1	W	P	0	1950	1924	26	4478	2294	0	2818	2311	0	0	0	0	0
563	2556	3085	3	0	0	W	W	1	1940	1913	27	3953	4394	0	3178	4395	0	0	0	0	0
563	3085	2556	3	0	0	W	W	1	1913	1940	27	4394	3953	0	4395	3178	0	0	0	0	0
564	2157	2685	1	0.03125	1	P	P	1	1941	1928	13	3022	3563	0	2123	3954	0	0	0	0	0
564	2685	2157	1	0.03125	1	P	P	1	1928	1941	13	3563	3022	0	3954	2123	0	0	0	0	0
565	2279	2807	1	0	1	P	W	0	1924	1948	24	2294	4478	0	2311	2818	0	0	0	0	0
565	2807	2279	1	0	1	W	P	0	1948	1924	24	4478	2294	0	2818	2311	0	0	0	0	0
566	2556	3084	2	0.125	1	W	W	1	1940	1939	1	3953	4159	0	3178	3178	1	0	0	0	0
566	3084	2556	2	0.125	1	W	W	1	1939	1940	1	4159	3953	0	3178	3178	1	0	0	0	0
567	2158	2685	2	0.125	1	B	P	0	1926	1928	2	2312	3563	0	2123	3954	0	0	0	0	0
567	2685	2158	2	0.125	1	P	B	0	1928	1926	2	3563	2312	0	3954	2123	0	0	0	0	0
568	2159	2685	5	0.25	1	B	P	0	1892	1928	36	2312	3563	0	2313	3954	0	0	0	0	0
568	2685	2159	5	0.25	1	P	B	0	1928	1892	36	3563	2312	0	3954	2313	0	0	0	0	0
569	2328	2852	1	0	1	W	W	1	1918	1946	28	4161	3022	0	3178	2123	0	0	0	0	0
569	2852	2328	1	0	1	W	W	1	1946	1918	28	3022	4161	0	2123	3178	0	0	0	0	0
570	2040	2556	6	0.15625	1	W	W	1	1939	1940	1	3586	3953	0	3956	3178	0	1	0	0	1
570	2556	2040	6	0.15625	1	W	W	1	1940	1939	1	3953	3586	0	3178	3956	0	0	0	0	1
571	2120	2631	2	0.09375	1	P	P	1	1946	1923	23	2312	3563	0	3564	3954	0	1	0	0	1
571	2631	2120	2	0.09375	1	P	P	1	1923	1946	23	3563	2312	0	3954	3564	0	1	0	0	1
572	2046	2556	4	0.25	1	W	W	1	1927	1940	13	3586	3953	0	3178	3178	1	0	0	0	0
572	2556	2046	4	0.25	1	W	W	1	1940	1927	13	3953	3586	0	3178	3178	1	0	0	0	0
573	2050	2556	3	0.15625	1	W	W	1	1948	1940	8	3586	3953	0	3956	3178	0	0	1	1	1
573	2556	2050	3	0.15625	1	W	W	1	1940	1948	8	3953	3586	0	3178	3956	0	0	1	1	1
574	2125	2631	6	0.0625	1	P	P	1	1912	1923	11	2312	3563	0	2123	3954	0	0	0	0	1
574	2631	2125	6	0.0625	1	P	P	0	1923	1912	11	3563	2312	0	3954	2123	0	1	0	0	1
575	2040	2543	2	0.0625	1	W	W	1	1939	1921	18	3586	4161	0	3956	3178	0	0	0	0	0
575	2543	2040	2	0.0625	1	W	W	1	1921	1939	18	4161	3586	0	3178	3956	0	0	0	0	0
576	2543	3045	1	0.0625	1	W	W	1	1921	1945	24	4161	3586	0	3178	3956	0	0	0	0	0
576	3045	2543	1	0.0625	1	W	W	1	1945	1921	24	3586	4161	0	3956	3178	0	0	0	0	0
577	2699	3200	1	0	1	P	W	0	1937	1956	19	3563	4478	0	3954	2818	0	0	0	0	0
577	3200	2699	1	0	1	W	P	0	1956	1937	19	4478	3563	0	2818	3954	0	0	0	0	0
578	2426	2926	2	0	1	W	W	1	1942	1927	15	3953	2819	0	3178	4274	0	0	0	0	0
578	2926	2426	2	0	1	W	W	1	1927	1942	15	2819	3953	0	4274	3178	0	0	0	0	0
579	2057	2556	3	0.15625	1	W	W	1	1951	1940	11	3586	3953	0	3956	3178	0	0	0	0	0
579	2556	2057	3	0.15625	1	W	W	1	1940	1951	11	3953	3586	0	3178	3956	0	0	0	0	0
580	2046	2543	3	0.125	1	W	W	1	1927	1921	6	3586	4161	0	3178	3178	1	0	0	0	0
580	2543	2046	3	0.125	1	W	W	1	1921	1927	6	4161	3586	0	3178	3178	1	0	0	0	0
581	2135	2631	4	0.125	1	P	P	1	1911	1923	12	2312	3563	0	3178	3954	0	0	0	0	0
581	2631	2135	4	0.125	1	P	P	1	1923	1911	12	3563	2312	0	3954	3178	0	0	0	0	0
582	3200	3696	1	0	1	W	W	1	1956	1904	52	4478	3953	0	2818	4176	0	0	0	0	0
582	3696	3200	1	0	1	W	W	1	1904	1956	52	3953	4478	0	4176	2818	0	0	0	0	0
583	2426	2919	1	0	1	W	W	1	1942	1953	11	3953	4478	0	3178	2818	0	0	0	0	0
583	2919	2426	1	0	1	W	W	1	1953	1942	11	4478	3953	0	2818	3178	0	0	0	0	0
584	2426	2918	3	0	1	W	W	1	1942	1945	3	3953	4478	0	3178	2818	0	0	0	0	0
584	2918	2426	3	0	1	W	W	1	1945	1942	3	4478	3953	0	2818	3178	0	0	0	0	0
585	2426	2917	3	0	1	W	W	1	1942	1934	8	3953	4478	0	3178	2818	0	0	0	0	0
585	2917	2426	3	0	1	W	W	1	1934	1942	8	4478	3953	0	2818	3178	0	0	0	0	0
586	2426	2916	2	0	1	W	W	1	1942	1930	12	3953	4478	0	3178	2818	0	0	0	0	0
586	2916	2426	2	0	1	W	W	1	1930	1942	12	4478	3953	0	2818	3178	0	0	0	0	0
587	2556	3045	2	0.15625	1	W	W	1	1940	1945	5	3953	3586	0	3178	3956	0	0	0	0	0
587	3045	2556	2	0.15625	1	W	W	1	1945	1940	5	3586	3953	0	3956	3178	0	0	0	0	0
588	3208	3696	1	0	1	W	W	1	1954	1904	50	4478	3953	0	2818	4176	0	0	0	0	0
588	3696	3208	1	0	1	W	W	1	1904	1954	50	3953	4478	0	4176	2818	0	0	0	0	0
589	2057	2543	1	0.0625	1	W	W	1	1951	1921	30	3586	4161	0	3956	3178	0	0	0	0	0
589	2543	2057	1	0.0625	1	W	W	1	1921	1951	30	4161	3586	0	3178	3956	0	0	0	0	0
590	3210	3696	1	0	1	W	W	1	1960	1904	56	4478	3953	0	2818	4176	0	0	0	0	0
590	3696	3210	1	0	1	W	W	1	1904	1960	56	3953	4478	0	4176	2818	0	0	0	0	0
591	2146	2631	2	0	0	P	P	1	1912	1923	11	2145	3563	0	2144	3954	0	0	0	0	0
591	2631	2146	2	0	0	P	P	1	1923	1912	11	3563	2145	0	3954	2144	0	0	0	0	0
592	2148	2631	2	0	1	G	P	0	1927	1923	4	2145	3563	0	3178	3954	0	0	0	0	0
592	2631	2148	2	0	1	P	G	0	1923	1927	4	3563	2145	0	3954	3178	0	0	0	0	0
593	2328	2811	1	0	1	W	W	1	1918	1954	36	4161	4478	0	3178	2818	0	0	0	0	0
593	2811	2328	1	0	1	W	W	1	1954	1918	36	4478	4161	0	2818	3178	0	0	0	0	0
594	2149	2631	1	0	1	P	P	1	1930	1923	7	2145	3563	0	3178	3954	0	0	0	0	0
594	2631	2149	1	0	1	P	P	1	1923	1930	7	3563	2145	0	3954	3178	0	0	0	0	0
595	2328	2809	2	0	1	W	W	1	1918	1950	32	4161	4478	0	3178	2818	0	0	0	0	0
595	2809	2328	2	0	1	W	W	1	1950	1918	32	4478	4161	0	2818	3178	0	0	0	0	0
596	2077	2556	2	0.0625	1	W	W	1	1945	1940	5	3953	3953	1	3956	3178	0	0	0	0	0
596	2556	2077	2	0.0625	1	W	W	1	1940	1945	5	3953	3953	1	3178	3956	0	0	0	0	0
597	2328	2807	3	0	1	W	W	1	1918	1948	30	4161	4478	0	3178	2818	0	0	0	0	0
597	2807	2328	3	0	1	W	W	1	1948	1918	30	4478	4161	0	2818	3178	0	0	0	0	0
598	2153	2631	1	0	1	P	P	1	1936	1923	13	2145	3563	0	3178	3954	0	0	0	0	0
598	2631	2153	1	0	1	P	P	1	1923	1936	13	3563	2145	0	3954	3178	0	0	0	0	0
599	2328	2806	2	0	1	W	W	1	1918	1942	24	4161	4478	0	3178	2818	0	0	0	0	0
599	2806	2328	2	0	1	W	W	1	1942	1918	24	4478	4161	0	2818	3178	0	0	0	0	0
600	2081	2556	2	0.5	1	W	W	1	1920	1940	20	3953	3953	1	4176	3178	0	0	0	0	0
600	2556	2081	2	0.5	1	W	W	1	1940	1920	20	3953	3953	1	3178	4176	0	0	0	0	0
601	2157	2631	2	0.03125	1	P	P	1	1941	1923	18	3022	3563	0	2123	3954	0	0	0	0	0
601	2631	2157	2	0.03125	1	P	P	1	1923	1941	18	3563	3022	0	3954	2123	0	0	0	0	0
602	2070	2543	1	0	0	W	W	1	1900	1921	21	3953	4161	0	3954	3178	0	0	0	0	0
602	2543	2070	1	0	0	W	W	1	1921	1900	21	4161	3953	0	3178	3954	0	0	0	0	0
603	2083	2556	5	0.5	1	W	W	1	1944	1940	4	3953	3953	1	3178	3178	1	0	0	0	0
603	2556	2083	5	0.5	1	W	W	1	1940	1944	4	3953	3953	1	3178	3178	1	0	0	0	0
604	2158	2631	2	0.125	1	B	P	0	1926	1923	3	2312	3563	0	2123	3954	0	0	0	0	0
604	2631	2158	2	0.125	1	P	B	0	1923	1926	3	3563	2312	0	3954	2123	0	0	0	0	0
605	2737	3210	1	0	0	P	W	0	1905	1960	55	3563	4478	0	4143	2818	0	0	0	0	0
605	3210	2737	1	0	0	W	P	0	1960	1905	55	4478	3563	0	2818	4143	0	0	0	0	0
606	2159	2631	4	0.25	1	B	P	0	1892	1923	31	2312	3563	0	2313	3954	0	0	0	0	0
606	2631	2159	4	0.25	1	P	B	0	1923	1892	31	3563	2312	0	3954	2313	0	0	0	0	0
607	2070	2541	1	0	0	W	W	1	1900	1900	0	3953	4161	0	3954	4176	0	0	0	0	0
607	2541	2070	1	0	0	W	W	1	1900	1900	0	4161	3953	0	4176	3954	0	0	0	0	0
608	2085	2556	3	0.5	1	W	W	1	1949	1940	9	3953	3953	1	3178	3178	1	0	0	0	0
608	2556	2085	3	0.5	1	W	W	1	1940	1949	9	3953	3953	1	3178	3178	1	0	0	0	0
609	2737	3208	1	0	0	P	W	0	1905	1954	49	3563	4478	0	4143	2818	0	0	0	0	0
609	3208	2737	1	0	0	W	P	0	1954	1905	49	4478	3563	0	2818	4143	0	0	0	0	0
610	2086	2556	1	0.5	1	W	W	1	1956	1940	16	3953	3953	1	3178	3178	1	0	0	0	0
610	2556	2086	1	0.5	1	W	W	1	1940	1956	16	3953	3953	1	3178	3178	1	0	0	0	0
611	2279	2747	1	0	1	P	P	1	1924	1928	4	2294	2312	0	2311	3564	0	0	0	0	0
611	2747	2279	1	0	1	P	P	1	1928	1924	4	2312	2294	0	3564	2311	0	0	0	0	0
612	2076	2543	1	0	1	W	W	1	1936	1921	15	3953	4161	0	3956	3178	0	0	0	0	0
612	2543	2076	1	0	1	W	W	1	1921	1936	15	4161	3953	0	3178	3956	0	0	0	0	0
613	2279	2746	1	0	1	P	P	1	1924	1950	26	2294	2312	0	2311	3954	0	0	0	0	0
613	2746	2279	1	0	1	P	P	1	1950	1924	26	2312	2294	0	3954	2311	0	0	0	0	0
614	2460	2926	3	0	1	W	W	1	1938	1927	11	4478	2819	0	2818	4274	0	0	0	0	0
614	2926	2460	3	0	1	W	W	1	1927	1938	11	2819	4478	0	4274	2818	0	0	0	0	0
615	2328	2791	1	0	1	W	W	1	1918	1936	18	4161	3953	0	3178	3956	0	0	0	0	0
615	2791	2328	1	0	1	W	W	1	1936	1918	18	3953	4161	0	3956	3178	0	0	0	0	0
616	2737	3200	1	0	0	P	W	0	1905	1956	51	3563	4478	0	4143	2818	0	0	0	0	0
616	3200	2737	1	0	0	W	P	0	1956	1905	51	4478	3563	0	2818	4143	0	0	0	0	0
617	2081	2543	1	0.09375	1	W	W	1	1920	1921	1	3953	4161	0	4176	3178	0	0	1	1	1
617	2543	2081	1	0.09375	1	W	W	1	1921	1920	1	4161	3953	0	3178	4176	0	0	1	1	1
618	2083	2543	1	0.109375	1	W	W	1	1944	1921	23	3953	4161	0	3178	3178	1	0	0	0	0
618	2543	2083	1	0.109375	1	W	W	1	1921	1944	23	4161	3953	0	3178	3178	1	0	0	0	0
619	2328	2787	1	0	0	W	W	1	1918	1888	30	4161	4478	0	3178	4479	0	1	0	0	1
619	2787	2328	1	0	0	W	W	1	1888	1918	30	4478	4161	0	4479	3178	0	0	0	0	1
620	2460	2919	1	0.25	1	W	W	1	1938	1953	15	4478	4478	1	2818	2818	1	0	0	0	0
620	2919	2460	1	0.25	1	W	W	1	1953	1938	15	4478	4478	1	2818	2818	1	0	0	0	0
621	2631	3090	1	0	1	P	W	0	1923	1955	32	3563	4394	0	3954	3178	0	0	0	0	0
621	3090	2631	1	0	1	W	P	0	1955	1923	32	4394	3563	0	3178	3954	0	0	0	0	0
622	2085	2543	1	0.109375	1	W	W	1	1949	1921	28	3953	4161	0	3178	3178	1	1	0	0	1
622	2543	2085	1	0.109375	1	W	W	1	1921	1949	28	4161	3953	0	3178	3178	1	0	0	0	1
623	2279	2737	1	0	0	P	P	1	1924	1905	19	2294	3563	0	2311	4143	0	0	0	0	0
623	2737	2279	1	0	0	P	P	1	1905	1924	19	3563	2294	0	4143	2311	0	0	0	0	0
624	2460	2918	2	0.25	1	W	W	1	1938	1945	7	4478	4478	1	2818	2818	1	0	0	0	0
624	2918	2460	2	0.25	1	W	W	1	1945	1938	7	4478	4478	1	2818	2818	1	0	0	0	0
625	2099	2556	1	0.0625	1	P	W	0	1946	1940	6	2312	3953	0	3564	3178	0	0	1	3	1
625	2556	2099	1	0.0625	1	W	P	0	1940	1946	6	3953	2312	0	3178	3564	0	0	1	3	1
626	2460	2917	2	0.25	1	W	W	1	1938	1934	4	4478	4478	1	2818	2818	1	0	0	0	0
626	2917	2460	2	0.25	1	W	W	1	1934	1938	4	4478	4478	1	2818	2818	1		0	0	0
627	2631	3088	1	0	1	P	W	0	1923	1948	25	3563	4394	0	3954	3178	0	0	0	0	0
627	3088	2631	1	0	1	W	P	0	1948	1923	25	4394	3563	0	3178	3954	0	0	0	0	0
628	2460	2916	3	0.25	1	W	W	1	1938	1930	8	4478	4478	1	2818	2818	1	0	0	0	0
628	2916	2460	3	0.25	1	W	W	1	1930	1938	8	4478	4478	1	2818	2818	1		0	0	0
629	2088	2543	1	0	1	P	W	0	1916	1921	5	2312	4161	0	2123	3178	0	0	1	1	1
629	2543	2088	1	0	1	W	P	0	1921	1916	5	4161	2312	0	3178	2123	0	0	1	1	1
630	2328	2783	1	0	1	W	W	1	1918	1933	15	4161	4478	0	3178	2818	0	1	0	0	1
630	2783	2328	1	0	1	W	W	1	1933	1918	15	4478	4161	0	2818	3178	0	0	0	0	1
631	2746	3200	1	0	1	P	W	0	1950	1956	6	2312	4478	0	3954	2818	0	0	0	0	0
631	3200	2746	1	0	1	W	P	0	1956	1950	6	4478	2312	0	2818	3954	0	0	0	0	0
632	2747	3200	1	0	1	P	W	0	1928	1956	28	2312	4478	0	3564	2818	0	0	0	0	0
632	3200	2747	1	0	1	W	P	0	1956	1928	28	4478	2312	0	2818	3564	0	0	0	0	0
635	2266	2699	1	0	0	P	P	1	1908	1937	29	3022	3563	0	3023	3954	0	0	0	0	0
635	2699	2266	1	0	0	P	P	1	1937	1908	29	3563	3022	0	3954	3023	0	0	0	0	0
636	2783	3210	1	0.4375	1	W	W	1	1933	1960	27	4478	4478	1	2818	2818	1	0	0	0	0
636	3210	2783	1	0.4375	1	W	W	1	1960	1933	27	4478	4478	1	2818	2818	1	0	0	0	0
637	2426	2852	1	0	1	W	W	1	1942	1946	4	3953	3022	0	3178	2123	0	0	0	0	0
637	2852	2426	1	0	1	W	W	1	1946	1942	4	3022	3953	0	2123	3178	0	0	0	0	0
638	2783	3208	1	0.4375	1	W	W	1	1933	1954	21	4478	4478	1	2818	2818	1	0	0	0	1
638	3208	2783	1	0.4375	1	W	W	1	1954	1933	21	4478	4478	1	2818	2818	1	1	0	0	1
639	2040	2460	4	0	1	W	W	1	1939	1938	1	3586	4478	0	3956	2818	0	0	0	0	0
639	2460	2040	4	0	1	W	W	1	1938	1939	1	4478	3586	0	2818	3956	0	0	0	0	0
640	2279	2699	3	0	1	P	P	1	1924	1937	13	2294	3563	0	2311	3954	0	0	0	0	0
640	2699	2279	3	0	1	P	P	1	1937	1924	13	3563	2294	0	3954	2311	0	0	0	0	0
641	2266	2685	1	0	0	P	P	1	1908	1928	20	3022	3563	0	3023	3954	0	0	0	0	0
641	2685	2266	1	0	0	P	P	1	1928	1908	20	3563	3022	0	3954	3023	0	0	0	0	0
642	2328	2747	1	0	1	W	P	0	1918	1928	10	4161	2312	0	3178	3564	0	0	0	0	0
642	2747	2328	1	0	1	P	W	0	1928	1918	10	2312	4161	0	3564	3178	0	0	0	0	0
643	2125	2543	1	0	1	P	W	0	1912	1921	9	2312	4161	0	2123	3178	0	0	0	0	0
643	2543	2125	1	0	1	W	P	0	1921	1912	9	4161	2312	0	3178	2123	0	0	0	0	0
644	2328	2746	1	0	1	W	P	0	1918	1950	32	4161	2312	0	3178	3954	0	0	0	0	0
644	2746	2328	1	0	1	P	W	0	1950	1918	32	2312	4161	0	3954	3178	0	0	0	0	0
645	2783	3200	1	0.4375	1	W	W	1	1933	1956	23	4478	4478	1	2818	2818	1	0	0	0	0
645	3200	2783	1	0.4375	1	W	W	1	1956	1933	23	4478	4478	1	2818	2818	1	0	0	0	0
646	2046	2460	3	0	1	W	W	1	1927	1938	11	3586	4478	0	3178	2818	0	0	0	0	0
646	2460	2046	3	0	1	W	W	1	1938	1927	11	4478	3586	0	2818	3178	0	0	0	0	0
649	2050	2460	3	0	1	W	W	1	1948	1938	10	3586	4478	0	3956	2818	0	0	0	0	0
649	2460	2050	3	0	1	W	W	1	1938	1948	10	4478	3586	0	2818	3956	0	0	0	0	0
650	2211	2620	1	0	1	G	G	1	1910	1919	9	4271	3566	0	3727	5143	0	0	0	0	0
650	2620	2211	1	0	1	G	G	1	1919	1910	9	3566	4271	0	5143	3727	0	0	0	0	0
651	2328	2737	1	0	0	W	P	0	1918	1905	13	4161	3563	0	3178	4143	0	0	0	0	0
651	2737	2328	1	0	0	P	W	0	1905	1918	13	3563	4161	0	4143	3178	0	0	0	0	0
652	2279	2685	2	0	1	P	P	1	1924	1928	4	2294	3563	0	2311	3954	0	0	0	0	0
652	2685	2279	2	0	1	P	P	1	1928	1924	4	3563	2294	0	3954	2311	0	0	0	0	0
653	2806	3210	1	0.3125	1	W	W	1	1942	1960	18	4478	4478	1	2818	2818	1	0	0	0	0
653	3210	2806	1	0.3125	1	W	W	1	1960	1942	18	4478	4478	1	2818	2818	1	0	0	0	0
654	2057	2460	2	0	1	W	W	1	1951	1938	13	3586	4478	0	3956	2818	0	0	0	0	0
654	2460	2057	2	0	1	W	W	1	1938	1951	13	4478	3586	0	2818	3956	0	0	0	0	0
655	2153	2556	1	0.125	1	P	W	0	1936	1940	4	2145	3953	0	3178	3178	1	0	0	0	0
655	2556	2153	1	0.125	1	W	P	0	1940	1936	4	3953	2145	0	3178	3178	1	0	0	0	0
656	2807	3210	1	0.3125	1	W	W	1	1948	1960	12	4478	4478	1	2818	2818	1	1	0	0	1
656	3210	2807	1	0.3125	1	W	W	1	1960	1948	12	4478	4478	1	2818	2818	1	1	0	0	1
657	2806	3208	1	0.3125	1	W	W	1	1942	1954	12	4478	4478	1	2818	2818	1	0	0	0	0
657	3208	2806	1	0.3125	1	W	W	1	1954	1942	12	4478	4478	1	2818	2818	1	0	0	0	0
658	2807	3208	1	0.3125	1	W	W	1	1948	1954	6	4478	4478	1	2818	2818	1	1	0	0	1
658	3208	2807	1	0.3125	1	W	W	1	1954	1948	6	4478	4478	1	2818	2818	1	0	0	0	1
659	2809	3210	1	0.3125	1	W	W	1	1950	1960	10	4478	4478	1	2818	2818	1	0	0	0	0
659	3210	2809	1	0.3125	1	W	W	1	1960	1950	10	4478	4478	1	2818	2818	1	0	0	0	0
661	2685	3085	1	0	0	P	W	0	1928	1913	15	3563	4394	0	3954	4395	0	0	0	0	0
661	3085	2685	1	0	0	W	P	0	1913	1928	15	4394	3563	0	4395	3954	0	0	0	0	0
662	2809	3208	1	0.3125	1	W	W	1	1950	1954	4	4478	4478	1	2818	2818	1	0	0	0	0
662	3208	2809	1	0.3125	1	W	W	1	1954	1950	4	4478	4478	1	2818	2818	1	0	0	0	0
663	2811	3210	1	0.34375	1	W	W	1	1954	1960	6	4478	4478	1	2818	2818	1	0	0	0	0
663	3210	2811	1	0.34375	1	W	W	1	1960	1954	6	4478	4478	1	2818	2818	1	0	0	0	0
664	2146	2543	1	0	0	P	W	0	1912	1921	9	2145	4161	0	2144	3178	0	0	0	0	0
664	2543	2146	1	0	0	W	P	0	1921	1912	9	4161	2145	0	3178	2144	0	0	0	0	0
665	2811	3208	1	0.34375	1	W	W	1	1954	1954	0	4478	4478	1	2818	2818	1	0	0	0	0
665	3208	2811	1	0.34375	1	W	W	1	1954	1954	0	4478	4478	1	2818	2818	1	0	0	0	0
666	2806	3200	1	0.3125	1	W	W	1	1942	1956	14	4478	4478	1	2818	2818	1	0	0	0	0
666	3200	2806	1	0.3125	1	W	W	1	1956	1942	14	4478	4478	1	2818	2818	1	0	0	0	0
667	2807	3200	2	0.3125	1	W	W	1	1948	1956	8	4478	4478	1	2818	2818	1	1	0	0	1
667	3200	2807	2	0.3125	1	W	W	1	1956	1948	8	4478	4478	1	2818	2818	1	1	0	0	1
668	2460	2852	1	0	1	W	W	1	1938	1946	8	4478	3022	0	2818	2123	0	0	0	0	0
668	2852	2460	1	0	1	W	W	1	1946	1938	8	3022	4478	0	2123	2818	0	0	0	0	0
669	2699	3090	1	0	1	P	W	0	1937	1955	18	3563	4394	0	3954	3178	0	0	0	0	0
669	3090	2699	1	0	1	W	P	0	1955	1937	18	4394	3563	0	3178	3954	0	0	0	0	0
670	2809	3200	2	0.3125	1	W	W	1	1950	1956	6	4478	4478	1	2818	2818	1	0	0	0	0
670	3200	2809	2	0.3125	1	W	W	1	1956	1950	6	4478	4478	1	2818	2818	1	0	0	0	0
671	2699	3088	1	0	1	P	W	0	1937	1948	11	3563	4394	0	3954	3178	0	0	0	0	0
671	3088	2699	1	0	1	W	P	0	1948	1937	11	4394	3563	0	3178	3954	0	0	0	0	0
672	2811	3200	1	0.34375	1	W	W	1	1954	1956	2	4478	4478	1	2818	2818	1	0	0	0	0
672	3200	2811	1	0.34375	1	W	W	1	1956	1954	2	4478	4478	1	2818	2818	1	0	0	0	0
673	2070	2458	1	0.25	1	W	W	1	1900	1901	1	3953	3953	1	3954	4176	0	0	0	0	0
673	2458	2070	1	0.25	1	W	W	1	1901	1900	1	3953	3953	1	4176	3954	0	0	0	0	0
674	2040	2426	4	0.15625	1	W	W	1	1939	1942	3	3586	3953	0	3956	3178	0	0	0	0	0
674	2426	2040	4	0.15625	1	W	W	1	1942	1939	3	3953	3586	0	3178	3956	0	0	0	0	0
675	2426	2811	1	0	1	W	W	1	1942	1954	12	3953	4478	0	3178	2818	0	0	0	0	0
675	2811	2426	1	0	1	W	W	1	1954	1942	12	4478	3953	0	2818	3178	0	0	0	0	0
676	2077	2460	1	0	1	W	W	1	1945	1938	7	3953	4478	0	3956	2818	0	1	0	0	1
676	2460	2077	1	0	1	W	W	1	1938	1945	7	4478	3953	0	2818	3956	0	1	0	0	1
677	2426	2809	2	0	1	W	W	1	1942	1950	8	3953	4478	0	3178	2818	0	0	0	0	0
677	2809	2426	2	0	1	W	W	1	1950	1942	8	4478	3953	0	2818	3178	0	0	0	0	0
678	2159	2541	1	0	0	B	W	0	1892	1900	8	2312	4161	0	2313	4176	0	0	0	0	0
678	2541	2159	1	0	0	W	B	0	1900	1892	8	4161	2312	0	4176	2313	0	0	0	0	0
679	2426	2807	4	0	1	W	W	1	1942	1948	6	3953	4478	0	3178	2818	0	0	0	0	0
679	2807	2426	4	0	1	W	W	1	1948	1942	6	4478	3953	0	2818	3178	0	0	0	0	0
680	2046	2426	5	0.25	1	W	W	1	1927	1942	15	3586	3953	0	3178	3178	1	0	0	0	0
680	2426	2046	5	0.25	1	W	W	1	1942	1927	15	3953	3586	0	3178	3178	1	0	0	0	0
681	2426	2806	2	0	1	W	W	1	1942	1942	0	3953	4478	0	3178	2818	0	0	0	0	0
681	2806	2426	2	0	1	W	W	1	1942	1942	0	4478	3953	0	2818	3178	0	0	0	0	0
682	2081	2460	1	0	1	W	W	1	1920	1938	18	3953	4478	0	4176	2818	0	0	0	0	0
682	2460	2081	1	0	1	W	W	1	1938	1920	18	4478	3953	0	2818	4176	0	0	0	0	0
683	2083	2460	2	0	1	W	W	1	1944	1938	6	3953	4478	0	3178	2818	0	0	0	0	0
683	2460	2083	2	0	1	W	W	1	1938	1944	6	4478	3953	0	2818	3178	0	0	0	0	0
684	2050	2426	2	0.15625	1	W	W	1	1948	1942	6	3586	3953	0	3956	3178	0	0	0	0	0
684	2426	2050	2	0.15625	1	W	W	1	1942	1948	6	3953	3586	0	3178	3956	0	0	0	0	0
685	2085	2460	1	0	1	W	W	1	1949	1938	11	3953	4478	0	3178	2818	0	0	0	0	0
685	2460	2085	1	0	1	W	W	1	1938	1949	11	4478	3953	0	2818	3178	0	0	0	0	0
686	2543	2918	1	0	1	W	W	1	1921	1945	24	4161	4478	0	3178	2818	0	0	0	0	0
686	2918	2543	1	0	1	W	W	1	1945	1921	24	4478	4161	0	2818	3178	0	0	0	0	0
687	2543	2917	1	0	1	W	W	1	1921	1934	13	4161	4478	0	3178	2818	0	0	0	0	0
687	2917	2543	1	0	1	W	W	1	1934	1921	13	4478	4161	0	2818	3178	0	0	0	0	0
688	2328	2699	1	0	1	W	P	0	1918	1937	19	4161	3563	0	3178	3954	0	0	0	0	0
688	2699	2328	1	0	1	P	W	0	1937	1918	19	3563	4161	0	3954	3178	0	0	0	0	0
689	2088	2458	1	0	1	P	W	0	1916	1901	15	2312	3953	0	2123	4176	0	0	0	0	0
689	2458	2088	1	0	1	W	P	0	1901	1916	15	3953	2312	0	4176	2123	0	0	0	0	0
690	2556	2926	2	0	1	W	W	1	1940	1927	13	3953	2819	0	3178	4274	0	0	0	0	0
690	2926	2556	2	0	1	W	W	1	1927	1940	13	2819	3953	0	4274	3178	0	0	0	0	0
691	2057	2426	2	0.15625	1	W	W	1	1951	1942	9	3586	3953	0	3956	3178	0	0	0	0	0
691	2426	2057	2	0.15625	1	W	W	1	1942	1951	9	3953	3586	0	3178	3956	0	0	0	0	0
692	2426	2791	1	0.0625	1	W	W	1	1942	1936	6	3953	3953	1	3178	3956	0	0	0	0	0
692	2791	2426	1	0.0625	1	W	W	1	1936	1942	6	3953	3953	1	3956	3178	0	0	0	0	0
693	2556	2919	1	0	1	W	W	1	1940	1953	13	3953	4478	0	3178	2818	0	0	0	0	0
693	2919	2556	1	0	1	W	W	1	1953	1940	13	4478	3953	0	2818	3178	0	0	0	0	0
694	2194	2556	1	0	1	W	W	1	1950	1940	10	4478	3953	0	4274	3178	0	0	0	0	0
694	2556	2194	1	0	1	W	W	1	1940	1950	10	3953	4478	0	3178	4274	0	0	0	0	0
695	2556	2918	3	0	1	W	W	1	1940	1945	5	3953	4478	0	3178	2818	0	0	0	0	0
695	2918	2556	3	0	1	W	W	1	1945	1940	5	4478	3953	0	2818	3178	0	0	0	0	0
696	2556	2917	2	0	1	W	W	1	1940	1934	6	3953	4478	0	3178	2818	0	0	0	0	0
696	2917	2556	2	0	1	W	W	1	1934	1940	6	4478	3953	0	2818	3178	0	0	0	0	0
697	2556	2916	2	0	1	W	W	1	1940	1930	10	3953	4478	0	3178	2818	0	0	0	0	0
697	2916	2556	2	0	1	W	W	1	1930	1940	10	4478	3953	0	2818	3178	0	0	0	0	0
698	2426	2783	1	0	1	W	W	1	1942	1933	9	3953	4478	0	3178	2818	0	0	0	0	0
698	2783	2426	1	0	1	W	W	1	1933	1942	9	4478	3953	0	2818	3178	0	0	0	0	0
699	2070	2426	1	0.125	1	W	W	1	1900	1942	42	3953	3953	1	3954	3178	0	0	0	0	0
699	2426	2070	1	0.125	1	W	W	1	1942	1900	42	3953	3953	1	3178	3954	0	0	0	0	0
700	2279	2631	2	0	1	P	P	1	1924	1923	1	2294	3563	0	2311	3954	0	0	0	0	0
700	2631	2279	2	0	1	P	P	1	1923	1924	1	3563	2294	0	3954	2311	0	0	0	0	0
701	2460	2811	1	0.4375	1	W	W	1	1938	1954	16	4478	4478	1	2818	2818	1	0	0	0	0
701	2811	2460	1	0.4375	1	W	W	1	1954	1938	16	4478	4478	1	2818	2818	1	0	0	0	0
702	2737	3088	1	0	0	P	W	0	1905	1948	43	3563	4394	0	4143	3178	0	0	0	0	0
702	3088	2737	1	0	0	W	P	0	1948	1905	43	4394	3563	0	3178	4143	0	0	0	0	0
703	2076	2426	1	0.0625	1	W	W	1	1936	1942	6	3953	3953	1	3956	3178	0	0	0	0	0
703	2426	2076	1	0.0625	1	W	W	1	1942	1936	6	3953	3953	1	3178	3956	0	0	0	0	0
704	2077	2426	2	0.0625	1	W	W	1	1945	1942	3	3953	3953	1	3956	3178	0	0	0	0	0
704	2426	2077	2	0.0625	1	W	W	1	1942	1945	3	3953	3953	1	3178	3956	0	0	0	0	0
705	2460	2809	2	0.5	1	W	W	1	1938	1950	12	4478	4478	1	2818	2818	1	0	0	0	0
705	2809	2460	2	0.5	1	W	W	1	1950	1938	12	4478	4478	1	2818	2818	1	0	0	0	0
706	2737	3085	3	0	0	P	W	0	1905	1913	8	3563	4394	0	4143	4395	0	0	0	0	0
706	3085	2737	3	0	0	W	P	0	1913	1905	8	4394	3563	0	4395	4143	0	0	0	0	0
707	2852	3200	1	0	1	W	W	1	1946	1956	10	3022	4478	0	2123	2818	0	0	0	0	0
707	3200	2852	1	0	1	W	W	1	1956	1946	10	4478	3022	0	2818	2123	0	0	0	0	0
708	3696	4044	1	0	1	W	W	1	1904	1952	48	3953	2819	0	4176	2815	0	0	0	0	0
708	4044	3696	1	0	1	W	W	1	1952	1904	48	2819	3953	0	2815	4176	0	0	0	0	0
709	2460	2807	3	0.5	1	W	W	1	1938	1948	10	4478	4478	1	2818	2818	1	0	0	0	0
709	2807	2460	3	0.5	1	W	W	1	1948	1938	10	4478	4478	1	2818	2818	1	0	0	0	0
710	2737	3084	1	0	0	P	W	0	1905	1939	34	3563	4159	0	4143	3178	0	0	0	0	0
710	3084	2737	1	0	0	W	P	0	1939	1905	34	4159	3563	0	3178	4143	0	0	0	0	0
711	2460	2806	2	0.5	1	W	W	1	1938	1942	4	4478	4478	1	2818	2818	1	0	0	0	0
711	2806	2460	2	0.5	1	W	W	1	1942	1938	4	4478	4478	1	2818	2818	1	0	0	0	0
712	2081	2426	3	0.25	1	W	W	1	1920	1942	22	3953	3953	1	4176	3178	0	0	0	0	0
712	2426	2081	3	0.25	1	W	W	1	1942	1920	22	3953	3953	1	3178	4176	0	0	0	0	0
713	2746	3090	1	0	1	P	W	0	1950	1955	5	2312	4394	0	3954	3178	0	0	0	0	0
713	3090	2746	1	0	1	W	P	0	1955	1950	5	4394	2312	0	3178	3954	0	0	0	0	0
714	2083	2426	3	0.25	1	W	W	1	1944	1942	2	3953	3953	1	3178	3178	1	0	0	0	0
714	2426	2083	3	0.25	1	W	W	1	1942	1944	2	3953	3953	1	3178	3178	1	0	0	0	0
715	2747	3090	1	0	1	P	W	0	1928	1955	27	2312	4394	0	3564	3178	0	0	0	0	0
715	3090	2747	1	0	1	W	P	0	1955	1928	27	4394	2312	0	3178	3564	0	0	0	0	0
716	2746	3088	1	0	1	P	W	0	1950	1948	2	2312	4394	0	3954	3178	0	0	0	0	0
716	3088	2746	1	0	1	W	P	0	1948	1950	2	4394	2312	0	3178	3954	0	0	0	0	0
717	2085	2426	2	0.25	1	W	W	1	1949	1942	7	3953	3953	1	3178	3178	1	0	0	0	0
717	2426	2085	2	0.25	1	W	W	1	1942	1949	7	3953	3953	1	3178	3178	1	0	0	0	0
718	2747	3088	1	0	1	P	W	0	1928	1948	20	2312	4394	0	3564	3178	0	0	0	0	0
718	3088	2747	1	0	1	W	P	0	1948	1928	20	4394	2312	0	3178	3564	0	0	0	0	0
719	2120	2460	1	0	1	P	W	0	1946	1938	8	2312	4478	0	3564	2818	0	0	0	0	0
719	2460	2120	1	0	1	W	P	0	1938	1946	8	4478	2312	0	2818	3564	0	0	0	0	0
720	2088	2426	1	0	1	P	W	0	1916	1942	26	2312	3953	0	2123	3178	0	0	0	0	0
720	2426	2088	1	0	1	W	P	0	1942	1916	26	3953	2312	0	3178	2123	0	0	0	0	0
721	2747	3085	1	0	0	P	W	0	1928	1913	15	2312	4394	0	3564	4395	0	0	0	0	0
721	3085	2747	1	0	0	W	P	0	1913	1928	15	4394	2312	0	4395	3564	0	0	0	0	0
722	2125	2458	1	0	1	P	W	0	1912	1901	11	2312	3953	0	2123	4176	0	0	0	0	0
722	2458	2125	1	0	1	W	P	0	1901	1912	11	3953	2312	0	4176	2123	0	0	0	0	0
723	2458	2787	1	0	0	W	W	1	1901	1888	13	3953	4478	0	4176	4479	0	0	0	0	0
723	2787	2458	1	0	0	W	W	1	1888	1901	13	4478	3953	0	4479	4176	0	0	0	0	0
724	2099	2426	1	0.0625	1	P	W	0	1946	1942	4	2312	3953	0	3564	3178	0	0	0	0	0
724	2426	2099	1	0.0625	1	W	P	0	1942	1946	4	3953	2312	0	3178	3564	0	0	0	0	0
725	2458	2784	2	0	0	W	G	0	1901	1896	5	3953	3566	0	4176	3565	0	0	0	0	0
725	2784	2458	2	0	0	G	W	0	1896	1901	5	3566	3953	0	3565	4176	0	0	0	0	0
726	2460	2783	1	0.375	1	W	W	1	1938	1933	5	4478	4478	1	2818	2818	1	0	0	0	0
726	2783	2460	1	0.375	1	W	W	1	1933	1938	5	4478	4478	1	2818	2818	1	0	0	0	0
727	2426	2747	1	0	1	W	P	0	1942	1928	14	3953	2312	0	3178	3564	0	0	0	0	0
727	2747	2426	1	0	1	P	W	0	1928	1942	14	2312	3953	0	3564	3178	0	0	0	0	0
728	2426	2746	1	0.0078125	1	W	P	0	1942	1950	8	3953	2312	0	3178	3954	0	0	0	0	0
728	2746	2426	1	0.0078125	1	P	W	0	1950	1942	8	2312	3953	0	3954	3178	0	0	0	0	0
730	2146	2458	1	0	0	P	W	0	1912	1901	11	2145	3953	0	2144	4176	0	0	0	0	0
730	2458	2146	1	0	0	W	P	0	1901	1912	11	3953	2145	0	4176	2144	0	0	0	0	0
731	2426	2737	1	0	0	W	P	0	1942	1905	37	3953	3563	0	3178	4143	0	0	0	0	0
731	2737	2426	1	0	0	P	W	0	1905	1942	37	3563	3953	0	4143	3178	0	0	0	0	0
732	2737	3045	1	0	0	P	W	0	1905	1945	40	3563	3586	0	4143	3956	0	0	0	0	0
732	3045	2737	1	0	0	W	P	0	1945	1905	40	3586	3563	0	3956	4143	0	0	0	0	0
733	2153	2460	1	0	1	P	W	0	1936	1938	2	2145	4478	0	3178	2818	0	1	0	0	1
733	2460	2153	1	0	1	W	P	0	1938	1936	2	4478	2145	0	2818	3178	0	0	0	0	1
734	2120	2426	1	0	1	P	W	0	1946	1942	4	2312	3953	0	3564	3178	0	0	0	0	0
734	2426	2120	1	0	1	W	P	0	1942	1946	4	3953	2312	0	3178	3564	0	0	0	0	0
735	2783	3088	1	0	1	W	W	1	1933	1948	15	4478	4394	0	2818	3178	0	0	0	0	1
735	3088	2783	1	0	1	W	W	1	1948	1933	15	4394	4478	0	3178	2818	0	1	0	0	1
736	2157	2460	1	0	1	P	W	0	1941	1938	3	3022	4478	0	2123	2818	0	0	0	0	0
736	2460	2157	1	0	1	W	P	0	1938	1941	3	4478	3022	0	2818	2123	0	0	0	0	0
737	2328	2631	1	0	1	W	P	0	1918	1923	5	4161	3563	0	3178	3954	0	0	0	0	0
737	2631	2328	1	0	1	P	W	0	1923	1918	5	3563	4161	0	3954	3178	0	0	0	0	0
738	2541	2844	1	0	1	W	G	0	1900	1911	11	4161	2857	0	4176	5143	0	0	0	0	0
738	2844	2541	1	0	1	G	W	0	1911	1900	11	2857	4161	0	5143	4176	0	0	0	0	0
740	2783	3085	1	0	0	W	W	1	1933	1913	20	4478	4394	0	2818	4395	0	0	1	1	1
740	3085	2783	1	0	0	W	W	1	1913	1933	20	4394	4478	0	4395	2818	0	0	1	1	1
741	2125	2426	1	0	1	P	W	0	1912	1942	30	2312	3953	0	2123	3178	0	0	0	0	0
741	2426	2125	1	0	1	W	P	0	1942	1912	30	3953	2312	0	3178	2123	0	0	0	0	0
742	2783	3084	1	0	1	W	W	1	1933	1939	6	4478	4159	0	2818	3178	0	0	0	0	0
742	3084	2783	1	0	1	W	W	1	1939	1933	6	4159	4478	0	3178	2818	0	0	0	0	0
743	2784	3085	2	0	0	G	W	0	1896	1913	17	3566	4394	0	3565	4395	0	0	0	0	0
743	3085	2784	2	0	0	W	G	0	1913	1896	17	4394	3566	0	4395	3565	0	0	0	0	0
744	2159	2458	2	0	0	B	W	0	1892	1901	9	2312	3953	0	2313	4176	0	0	0	0	0
744	2458	2159	2	0	0	W	B	0	1901	1892	9	3953	2312	0	4176	2313	0	0	0	0	0
745	2620	2916	1	0	1	G	W	0	1919	1930	11	3566	4478	0	5143	2818	0	0	0	0	0
745	2916	2620	1	0	1	W	G	0	1930	1919	11	4478	3566	0	2818	5143	0	0	0	0	0
746	2631	2926	1	0	1	P	W	0	1923	1927	4	3563	2819	0	3954	4274	0	0	0	0	0
746	2926	2631	1	0	1	W	P	0	1927	1923	4	2819	3563	0	4274	3954	0	0	0	0	0
747	2791	3085	2	0	0	W	W	1	1936	1913	23	3953	4394	0	3956	4395	0	0	0	0	0
747	3085	2791	2	0	0	W	W	1	1913	1936	23	4394	3953	0	4395	3956	0	0	0	0	0
748	2916	3210	1	0.6875	1	W	W	1	1930	1960	30	4478	4478	1	2818	2818	1	0	0	0	0
748	3210	2916	1	0.6875	1	W	W	1	1960	1930	30	4478	4478	1	2818	2818	1	0	0	0	0
749	2917	3210	1	0.4375	1	W	W	1	1934	1960	26	4478	4478	1	2818	2818	1	0	0	0	0
749	3210	2917	1	0.4375	1	W	W	1	1960	1934	26	4478	4478	1	2818	2818	1	0	0	0	0
750	2916	3208	1	0.6875	1	W	W	1	1930	1954	24	4478	4478	1	2818	2818	1	0	0	0	0
750	3208	2916	1	0.6875	1	W	W	1	1954	1930	24	4478	4478	1	2818	2818	1	0	0	0	0
751	2918	3210	1	0.4375	1	W	W	1	1945	1960	15	4478	4478	1	2818	2818	1	0	0	0	0
751	3210	2918	1	0.4375	1	W	W	1	1960	1945	15	4478	4478	1	2818	2818	1	0	0	0	0
752	2917	3208	1	0.4375	1	W	W	1	1934	1954	20	4478	4478	1	2818	2818	1	0	0	0	0
752	3208	2917	1	0.4375	1	W	W	1	1954	1934	20	4478	4478	1	2818	2818	1	0	0	0	0
753	2919	3210	1	0.4375	1	W	W	1	1953	1960	7	4478	4478	1	2818	2818	1	0	0	0	0
753	3210	2919	1	0.4375	1	W	W	1	1960	1953	7	4478	4478	1	2818	2818	1	0	0	0	0
754	2918	3208	1	0.4375	1	W	W	1	1945	1954	9	4478	4478	1	2818	2818	1	0	0	0	0
754	3208	2918	1	0.4375	1	W	W	1	1954	1945	9	4478	4478	1	2818	2818	1	0	0	0	0
755	2919	3208	1	0.4375	1	W	W	1	1953	1954	1	4478	4478	1	2818	2818	1	0	0	0	0
755	3208	2919	1	0.4375	1	W	W	1	1954	1953	1	4478	4478	1	2818	2818	1	0	0	0	0
756	2040	2328	3	0.0625	1	W	W	1	1939	1918	21	3586	4161	0	3956	3178	0	0	0	0	0
756	2328	2040	3	0.0625	1	W	W	1	1918	1939	21	4161	3586	0	3178	3956	0	0	0	0	0
757	2460	2747	2	0	1	W	P	0	1938	1928	10	4478	2312	0	2818	3564	0	0	0	0	0
757	2747	2460	2	0	1	P	W	0	1928	1938	10	2312	4478	0	3564	2818	0	0	0	0	0
758	2460	2746	1	0	1	W	P	0	1938	1950	12	4478	2312	0	2818	3954	0	0	0	0	0
758	2746	2460	1	0	1	P	W	0	1950	1938	12	2312	4478	0	3954	2818	0	0	0	0	0
759	2631	2917	1	0	1	P	W	0	1923	1934	11	3563	4478	0	3954	2818	0	0	0	0	0
759	2917	2631	1	0	1	W	P	0	1934	1923	11	4478	3563	0	2818	3954	0	0	0	0	0
760	2631	2916	1	0	1	P	W	0	1923	1930	7	3563	4478	0	3954	2818	0	0	0	0	0
760	2916	2631	1	0	1	W	P	0	1930	1923	7	4478	3563	0	2818	3954	0	0	0	0	0
761	2801	3085	1	0	0	W	W	1	1913	1913	0	4478	4394	0	2815	4395	0	0	0	0	0
761	3085	2801	1	0	0	W	W	1	1913	1913	0	4394	4478	0	4395	2815	0	0	0	0	0
762	2916	3200	2	0.6875	1	W	W	1	1930	1956	26	4478	4478	1	2818	2818	1	0	0	0	0
762	3200	2916	2	0.6875	1	W	W	1	1956	1930	26	4478	4478	1	2818	2818	1	0	0	0	0
763	2926	3210	1	0	1	W	W	1	1927	1960	33	2819	4478	0	4274	2818	0	0	0	0	0
763	3210	2926	1	0	1	W	W	1	1960	1927	33	4478	2819	0	2818	4274	0	0	0	0	0
764	2460	2743	1	0	1	W	P	0	1938	1934	4	4478	3563	0	2818	3954	0	0	0	0	0
764	2743	2460	1	0	1	P	W	0	1934	1938	4	3563	4478	0	3954	2818	0	0	0	0	0
765	2807	3090	2	0	1	W	W	1	1948	1955	7	4478	4394	0	2818	3178	0	0	0	0	0
765	3090	2807	2	0	1	W	W	1	1955	1948	7	4394	4478	0	3178	2818	0	0	0	0	0
766	2917	3200	2	0.4375	1	W	W	1	1934	1956	22	4478	4478	1	2818	2818	1	0	0	0	0
766	3200	2917	2	0.4375	1	W	W	1	1956	1934	22	4478	4478	1	2818	2818	1	0	0	0	0
767	2046	2328	4	0.125	1	W	W	1	1927	1918	9	3586	4161	0	3178	3178	1	0	0	0	0
767	2328	2046	4	0.125	1	W	W	1	1918	1927	9	4161	3586	0	3178	3178	1	0	0	0	0
768	2806	3088	3	0	1	W	W	1	1942	1948	6	4478	4394	0	2818	3178	0	0	0	0	0
768	3088	2806	3	0	1	W	W	1	1948	1942	6	4394	4478	0	3178	2818	0	0	0	0	0
769	2918	3200	1	0.4375	1	W	W	1	1945	1956	11	4478	4478	1	2818	2818	1	0	0	0	0
769	3200	2918	1	0.4375	1	W	W	1	1956	1945	11	4478	4478	1	2818	2818	1	0	0	0	0
770	2926	3208	1	0	1	W	W	1	1927	1954	27	2819	4478	0	4274	2818	0	0	0	0	0
770	3208	2926	1	0	1	W	W	1	1954	1927	27	4478	2819	0	2818	4274	0	0	0	0	0
771	2807	3088	6	0	1	W	W	1	1948	1948	0	4478	4394	0	2818	3178	0	0	0	0	0
771	3088	2807	6	0	1	W	W	1	1948	1948	0	4394	4478	0	3178	2818	0	0	0	0	0
772	2809	3090	1	0	1	W	W	1	1950	1955	5	4478	4394	0	2818	3178	0	0	0	0	0
772	3090	2809	1	0	1	W	W	1	1955	1950	5	4394	4478	0	3178	2818	0	0	0	0	0
773	2919	3200	1	0.4375	1	W	W	1	1953	1956	3	4478	4478	1	2818	2818	1	0	0	0	0
773	3200	2919	1	0.4375	1	W	W	1	1956	1953	3	4478	4478	1	2818	2818	1	0	0	0	0
774	2458	2737	3	0	0	W	P	0	1901	1905	4	3953	3563	0	4176	4143	0	0	0	0	0
774	2737	2458	3	0	0	P	W	0	1905	1901	4	3563	3953	0	4143	4176	0	0	0	0	0
775	2806	3085	2	0	0	W	W	1	1942	1913	29	4478	4394	0	2818	4395	0	0	0	0	0
775	3085	2806	2	0	0	W	W	1	1913	1942	29	4394	4478	0	4395	2818	0	0	0	0	0
776	2809	3088	2	0	1	W	W	1	1950	1948	2	4478	4394	0	2818	3178	0	0	0	0	0
776	3088	2809	2	0	1	W	W	1	1948	1950	2	4394	4478	0	3178	2818	0	0	0	0	0
777	2050	2328	2	0.0625	1	W	W	1	1948	1918	30	3586	4161	0	3956	3178	0	0	0	0	0
777	2328	2050	2	0.0625	1	W	W	1	1918	1948	30	4161	3586	0	3178	3956	0	0	0	0	0
778	2148	2426	1	0.125	1	G	W	0	1927	1942	15	2145	3953	0	3178	3178	1	0	0	0	0
778	2426	2148	1	0.125	1	W	G	0	1942	1927	15	3953	2145	0	3178	3178	1	0	0	0	0
779	2806	3084	2	0	1	W	W	1	1942	1939	3	4478	4159	0	2818	3178	0	0	0	0	0
779	3084	2806	2	0	1	W	W	1	1939	1942	3	4159	4478	0	3178	2818	0	0	0	0	0
780	2807	3085	3	0	0	W	W	1	1948	1913	35	4478	4394	0	2818	4395	0	0	0	0	0
780	3085	2807	3	0	0	W	W	1	1913	1948	35	4394	4478	0	4395	2818	0	0	0	0	0
781	2460	2737	1	0	0	W	P	0	1938	1905	33	4478	3563	0	2818	4143	0	0	0	0	0
781	2737	2460	1	0	0	P	W	0	1905	1938	33	3563	4478	0	4143	2818	0	0	0	0	0
782	2807	3084	2	0	1	W	W	1	1948	1939	9	4478	4159	0	2818	3178	0	0	0	0	0
782	3084	2807	2	0	1	W	W	1	1939	1948	9	4159	4478	0	3178	2818	0	0	0	0	0
783	2811	3088	1	0	1	W	W	1	1954	1948	6	4478	4394	0	2818	3178	0	0	0	0	0
783	3088	2811	1	0	1	W	W	1	1948	1954	6	4394	4478	0	3178	2818	0	0	0	0	0
784	2809	3085	1	0	0	W	W	1	1950	1913	37	4478	4394	0	2818	4395	0	0	0	0	0
784	3085	2809	1	0	0	W	W	1	1913	1950	37	4394	4478	0	4395	2818	0	0	0	0	0
785	2809	3084	1	0	1	W	W	1	1950	1939	11	4478	4159	0	2818	3178	0	0	0	0	0
785	3084	2809	1	0	1	W	W	1	1939	1950	11	4159	4478	0	3178	2818	0	0	0	0	0
786	2811	3085	1	0	0	W	W	1	1954	1913	41	4478	4394	0	2818	4395	0	0	0	0	0
786	3085	2811	1	0	0	W	W	1	1913	1954	41	4394	4478	0	4395	2818	0	0	0	0	0
787	2926	3200	2	0	1	W	W	1	1927	1956	29	2819	4478	0	4274	2818	0	0	1	1	1
787	3200	2926	2	0	1	W	W	1	1956	1927	29	4478	2819	0	2818	4274	0	0	1	1	1
788	2426	2699	1	0.015625	1	W	P	0	1942	1937	5	3953	3563	0	3178	3954	0	0	0	0	0
788	2699	2426	1	0.015625	1	P	W	0	1937	1942	5	3563	3953	0	3954	3178	0	0	0	0	0
789	2811	3084	1	0	1	W	W	1	1954	1939	15	4478	4159	0	2818	3178	0	0	0	0	0
789	3084	2811	1	0	1	W	W	1	1939	1954	15	4159	4478	0	3178	2818	0	0	0	0	0
790	2057	2328	1	0.0625	1	W	W	1	1951	1918	33	3586	4161	0	3956	3178	0	0	0	0	0
790	2328	2057	1	0.0625	1	W	W	1	1918	1951	33	4161	3586	0	3178	3956	0	0	0	0	0
791	2157	2426	1	0	1	P	W	0	1941	1942	1	3022	3953	0	2123	3178	0	0	0	0	0
791	2426	2157	1	0	1	W	P	0	1942	1941	1	3953	3022	0	3178	2123	0	0	0	0	0
792	2158	2426	1	0	1	B	W	0	1926	1942	16	2312	3953	0	2123	3178	0	0	0	0	0
792	2426	2158	1	0	1	W	B	0	1942	1926	16	3953	2312	0	3178	2123	0	0	0	0	0
793	2159	2426	1	0	0	B	W	0	1892	1942	50	2312	3953	0	2313	3178	0	0	0	0	0
793	2426	2159	1	0	0	W	B	0	1942	1892	50	3953	2312	0	3178	2313	0	0	0	0	0
795	2194	2460	1	0.1875	1	W	W	1	1950	1938	12	4478	4478	1	4274	2818	0	0	0	0	0
795	2460	2194	1	0.1875	1	W	W	1	1938	1950	12	4478	4478	1	2818	4274	0	0	0	0	0
796	2543	2807	1	0	1	W	W	1	1921	1948	27	4161	4478	0	3178	2818	0	0	0	0	0
796	2807	2543	1	0	1	W	W	1	1948	1921	27	4478	4161	0	2818	3178	0	0	0	0	0
797	2836	3100	2	0	1	G	G	1	1932	1933	1	3712	3463	0	3711	3178	0	0	0	0	0
797	3100	2836	2	0	1	G	G	1	1933	1932	1	3463	3712	0	3178	3711	0	0	0	0	0
798	2543	2806	1	0	1	W	W	1	1921	1942	21	4161	4478	0	3178	2818	0	0	0	0	0
798	2806	2543	1	0	1	W	W	1	1942	1921	21	4478	4161	0	2818	3178	0	0	0	0	0
799	2783	3045	1	0	1	W	W	1	1933	1945	12	4478	3586	0	2818	3956	0	0	0	0	0
799	3045	2783	1	0	1	W	W	1	1945	1933	12	3586	4478	0	3956	2818	0	0	0	0	0
800	2426	2685	1	0.015625	1	W	P	0	1942	1928	14	3953	3563	0	3178	3954	0	0	0	0	0
800	2685	2426	1	0.015625	1	P	W	0	1928	1942	14	3563	3953	0	3954	3178	0	0	0	0	0
801	2070	2328	1	0	0	W	W	1	1900	1918	18	3953	4161	0	3954	3178	0	0	0	0	0
801	2328	2070	1	0	0	W	W	1	1918	1900	18	4161	3953	0	3178	3954	0	0	0	0	0
802	2543	2801	1	0	1	W	W	1	1921	1913	8	4161	4478	0	3178	2815	0	0	0	0	0
802	2801	2543	1	0	1	W	W	1	1913	1921	8	4478	4161	0	2815	3178	0	0	0	0	0
803	2844	3100	1	0	1	G	G	1	1911	1933	22	2857	3463	0	5143	3178	0	0	0	0	0
803	3100	2844	1	0	1	G	G	1	1933	1911	22	3463	2857	0	3178	5143	0	0	0	0	0
804	2556	2811	1	0	1	W	W	1	1940	1954	14	3953	4478	0	3178	2818	0	0	0	0	0
804	2811	2556	1	0	1	W	W	1	1954	1940	14	4478	3953	0	2818	3178	0	0	0	0	0
805	2556	2809	1	0	1	W	W	1	1940	1950	10	3953	4478	0	3178	2818	0	0	0	0	0
805	2809	2556	1	0	1	W	W	1	1950	1940	10	4478	3953	0	2818	3178	0	0	0	0	0
806	2076	2328	1	0	1	W	W	1	1936	1918	18	3953	4161	0	3956	3178	0	0	1	1	1
806	2328	2076	1	0	1	W	W	1	1918	1936	18	4161	3953	0	3178	3956	0	0	1	1	1
807	2620	2872	1	0.125	1	G	G	1	1919	1916	3	3566	2857	0	5143	5143	1	0	0	0	0
807	2872	2620	1	0.125	1	G	G	1	1916	1919	3	2857	3566	0	5143	5143	1	0	0	0	0
808	2077	2328	2	0	1	W	W	1	1945	1918	27	3953	4161	0	3956	3178	0	0	0	0	0
808	2328	2077	2	0	1	W	W	1	1918	1945	27	4161	3953	0	3178	3956	0	0	0	0	0
809	2556	2807	5	0	1	W	W	1	1940	1948	8	3953	4478	0	3178	2818	0	0	0	0	0
809	2807	2556	5	0	1	W	W	1	1948	1940	8	4478	3953	0	2818	3178	0	0	0	0	0
810	2556	2806	3	0	1	W	W	1	1940	1942	2	3953	4478	0	3178	2818	0	0	0	0	0
810	2806	2556	3	0	1	W	W	1	1942	1940	2	4478	3953	0	2818	3178	0	0	0	0	0
811	2543	2791	1	0	1	W	W	1	1921	1936	15	4161	3953	0	3178	3956	0	0	0	0	0
811	2791	2543	1	0	1	W	W	1	1936	1921	15	3953	4161	0	3956	3178	0	0	0	0	0
812	2081	2328	3	0.09375	1	W	W	1	1920	1918	2	3953	4161	0	4176	3178	0	0	1	1	1
812	2328	2081	3	0.09375	1	W	W	1	1918	1920	2	4161	3953	0	3178	4176	0	1	1	1	1
813	2541	2787	1	0	0	W	W	1	1900	1888	12	4161	4478	0	4176	4479	0	0	1	1	1
813	2787	2541	1	0	0	W	W	1	1888	1900	12	4478	4161	0	4479	4176	0	0	1	1	1
814	2083	2328	2	0.109375	1	W	W	1	1944	1918	26	3953	4161	0	3178	3178	1	0	0	0	0
814	2328	2083	2	0.109375	1	W	W	1	1918	1944	26	4161	3953	0	3178	3178	1	0	0	0	0
815	2085	2328	1	0.109375	1	W	W	1	1949	1918	31	3953	4161	0	3178	3178	1	0	0	0	0
815	2328	2085	1	0.109375	1	W	W	1	1918	1949	31	4161	3953	0	3178	3178	1	0	0	0	0
816	2541	2784	1	0	0	W	G	0	1900	1896	4	4161	3566	0	4176	3565	0	0	0	0	0
816	2784	2541	1	0	0	G	W	0	1896	1900	4	3566	4161	0	3565	4176	0	0	0	0	0
817	2543	2784	1	0	0	W	G	0	1921	1896	25	4161	3566	0	3178	3565	0	0	0	0	0
817	2784	2543	1	0	0	G	W	0	1896	1921	25	3566	4161	0	3565	3178	0	0	0	0	0
818	2685	2926	1	0	1	P	W	0	1928	1927	1	3563	2819	0	3954	4274	0	0	0	0	0
818	2926	2685	1	0	1	W	P	0	1927	1928	1	2819	3563	0	4274	3954	0	0	0	0	0
819	2040	2279	1	0	1	W	P	0	1939	1924	15	3586	2294	0	3956	2311	0	0	0	0	0
819	2279	2040	1	0	1	P	W	0	1924	1939	15	2294	3586	0	2311	3956	0	0	0	0	0
820	2460	2699	1	0	1	W	P	0	1938	1937	1	4478	3563	0	2818	3954	0	0	0	0	0
820	2699	2460	1	0	1	P	W	0	1937	1938	1	3563	4478	0	3954	2818	0	0	0	0	0
821	2806	3045	2	0	1	W	W	1	1942	1945	3	4478	3586	0	2818	3956	0	0	0	0	0
821	3045	2806	2	0	1	W	W	1	1945	1942	3	3586	4478	0	3956	2818	0	0	0	0	0
822	2807	3045	2	0	1	W	W	1	1948	1945	3	4478	3586	0	2818	3956	0	0	0	0	0
822	3045	2807	2	0	1	W	W	1	1945	1948	3	3586	4478	0	3956	2818	0	0	0	0	0
823	2852	3090	1	0	1	W	W	1	1946	1955	9	3022	4394	0	2123	3178	0	0	0	0	0
823	3090	2852	1	0	1	W	W	1	1955	1946	9	4394	3022	0	3178	2123	0	0	0	0	0
824	2809	3045	1	0	1	W	W	1	1950	1945	5	4478	3586	0	2818	3956	0	0	0	0	0
824	3045	2809	1	0	1	W	W	1	1945	1950	5	3586	4478	0	3956	2818	0	0	0	0	0
825	2852	3088	1	0	1	W	W	1	1946	1948	2	3022	4394	0	2123	3178	0	0	0	0	0
825	3088	2852	1	0	1	W	W	1	1948	1946	2	4394	3022	0	3178	2123	0	0	0	0	0
826	2811	3045	1	0	1	W	W	1	1954	1945	9	4478	3586	0	2818	3956	0	0	0	0	0
826	3045	2811	1	0	1	W	W	1	1945	1954	9	3586	4478	0	3956	2818	0	0	0	0	0
827	2866	3100	2	0	1	G	G	1	1935	1933	2	3712	3463	0	3711	3178	0	0	0	0	0
827	3100	2866	2	0	1	G	G	1	1933	1935	2	3463	3712	0	3178	3711	0	0	0	0	0
828	2046	2279	1	0	1	W	P	0	1927	1924	3	3586	2294	0	3178	2311	0	0	0	0	0
828	2279	2046	1	0	1	P	W	0	1924	1927	3	2294	3586	0	2311	3178	0	0	0	0	0
829	2194	2426	1	0	1	W	W	1	1950	1942	8	4478	3953	0	4274	3178	0	0	0	0	0
829	2426	2194	1	0	1	W	W	1	1942	1950	8	3953	4478	0	3178	4274	0	0	0	0	0
830	2050	2279	1	0	1	W	P	0	1948	1924	24	3586	2294	0	3956	2311	0	0	0	0	0
830	2279	2050	1	0	1	P	W	0	1924	1948	24	2294	3586	0	2311	3956	0	0	0	0	0
831	2099	2328	1	0.0625	1	P	W	0	1946	1918	28	2312	4161	0	3564	3178	0	0	0	0	0
831	2328	2099	1	0.0625	1	W	P	0	1918	1946	28	4161	2312	0	3178	3564	0	0	0	0	0
832	2328	2556	2	0.109375	1	W	W	1	1918	1940	22	4161	3953	0	3178	3178	1	0	0	0	1
832	2556	2328	2	0.109375	1	W	W	1	1940	1918	22	3953	4161	0	3178	3178	1	1	0	0	1
833	2872	3100	3	0	1	G	G	1	1916	1933	17	2857	3463	0	5143	3178	0	0	0	0	0
833	3100	2872	3	0	1	G	G	1	1933	1916	17	3463	2857	0	3178	5143	0	0	0	0	0
834	2458	2685	1	0.03125	1	W	P	0	1901	1928	27	3953	3563	0	4176	3954	0	0	0	0	0
834	2685	2458	1	0.03125	1	P	W	0	1928	1901	27	3563	3953	0	3954	4176	0	0	0	0	0
835	2556	2783	1	0	1	W	W	1	1940	1933	7	3953	4478	0	3178	2818	0	0	0	0	0
835	2783	2556	1	0	1	W	W	1	1933	1940	7	4478	3953	0	2818	3178	0	0	0	0	0
836	2699	2926	2	0	1	P	W	0	1937	1927	10	3563	2819	0	3954	4274	0	0	0	0	0
836	2926	2699	2	0	1	W	P	0	1927	1937	10	2819	3563	0	4274	3954	0	0	0	0	0
837	2620	2844	1	0.125	1	G	G	1	1919	1911	8	3566	2857	0	5143	5143	1	0	0	0	0
837	2844	2620	1	0.125	1	G	G	1	1911	1919	8	2857	3566	0	5143	5143	1	0	0	0	0
838	2631	2852	1	0.0625	1	P	W	0	1923	1946	23	3563	3022	0	3954	2123	0	0	0	0	0
838	2852	2631	1	0.0625	1	W	P	0	1946	1923	23	3022	3563	0	2123	3954	0	0	0	0	0
839	2699	2917	1	0	1	P	W	0	1937	1934	3	3563	4478	0	3954	2818	0	0	0	0	0
839	2917	2699	1	0	1	W	P	0	1934	1937	3	4478	3563	0	2818	3954	0	0	0	0	0
840	2699	2916	1	0	1	P	W	0	1937	1930	7	3563	4478	0	3954	2818	0	0	0	0	0
840	2916	2699	1	0	1	W	P	0	1930	1937	7	4478	3563	0	2818	3954	0	0	0	0	0
841	2328	2543	1	0.5	1	W	W	1	1918	1921	3	4161	4161	1	3178	3178	1	0	0	0	0
841	2543	2328	1	0.5	1	W	W	1	1921	1918	3	4161	4161	1	3178	3178	1	0	0	0	0
842	2120	2328	1	0	1	P	W	0	1946	1918	28	2312	4161	0	3564	3178	0	0	0	0	0
842	2328	2120	1	0	1	W	P	0	1918	1946	28	4161	2312	0	3178	3564	0	0	0	0	0
843	2426	2631	2	0.015625	1	W	P	0	1942	1923	19	3953	3563	0	3178	3954	0	0	0	0	0
843	2631	2426	2	0.015625	1	P	W	0	1923	1942	19	3563	3953	0	3954	3178	0	0	0	0	0
844	2620	2822	1	0	1	G	G	1	1919	1915	4	3566	3814	0	5143	5156	0	0	0	0	0
844	2822	2620	1	0	1	G	G	1	1915	1919	4	3814	3566	0	5156	5143	0	0	0	0	0
845	2541	2737	1	0	0	W	P	0	1900	1905	5	4161	3563	0	4176	4143	0	0	0	0	0
845	2737	2541	1	0	0	P	W	0	1905	1900	5	3563	4161	0	4143	4176	0	0	0	0	0
846	2543	2737	1	0	0	W	P	0	1921	1905	16	4161	3563	0	3178	4143	0	0	0	0	0
846	2737	2543	1	0	0	P	W	0	1905	1921	16	3563	4161	0	4143	3178	0	0	0	0	0
847	2088	2279	1	0	1	P	P	1	1916	1924	8	2312	2294	0	2123	2311	0	0	0	0	1
847	2279	2088	1	0	1	P	P	1	1924	1916	8	2294	2312	0	2311	2123	0	1	0	0	1
848	2556	2747	1	0	1	W	P	0	1940	1928	12	3953	2312	0	3178	3564	0	0	0	0	0
848	2747	2556	1	0	1	P	W	0	1928	1940	12	2312	3953	0	3564	3178	0	0	0	0	0
849	2631	2822	2	0	1	P	G	0	1923	1915	8	3563	3814	0	3954	5156	0	0	0	0	0
849	2822	2631	2	0	1	G	P	0	1915	1923	8	3814	3563	0	5156	3954	0	0	0	0	0
850	2737	2926	1	0	0	P	W	0	1905	1927	22	3563	2819	0	4143	4274	0	0	0	0	0
850	2926	2737	1	0	0	W	P	0	1927	1905	22	2819	3563	0	4274	4143	0	0	0	0	0
851	2556	2743	1	0.015625	1	W	P	0	1940	1934	6	3953	3563	0	3178	3954	0	0	0	0	0
851	2743	2556	1	0.015625	1	P	W	0	1934	1940	6	3563	3953	0	3954	3178	0	0	0	0	0
852	2737	2919	1	0	0	P	W	0	1905	1953	48	3563	4478	0	4143	2818	0	0	0	0	0
852	2919	2737	1	0	0	W	P	0	1953	1905	48	4478	3563	0	2818	4143	0	0	0	0	0
853	2098	2279	1	0	1	B	P	0	1944	1924	20	2312	2294	0	3564	2311	0	1	0	0	1
853	2279	2098	1	0	1	P	B	0	1924	1944	20	2294	2312	0	2311	3564	0	0	0	0	1
854	2279	2460	1	0	1	P	W	0	1924	1938	14	2294	4478	0	2311	2818	0	0	0	0	0
854	2460	2279	1	0	1	W	P	0	1938	1924	14	4478	2294	0	2818	2311	0	0	0	0	0
855	2556	2737	1	0	0	W	P	0	1940	1905	35	3953	3563	0	3178	4143	0	0	0	0	0
855	2737	2556	1	0	0	P	W	0	1905	1940	35	3563	3953	0	4143	3178	0	0	0	0	0
856	2737	2918	1	0	0	P	W	0	1905	1945	40	3563	4478	0	4143	2818	0	0	0	0	0
856	2918	2737	1	0	0	W	P	0	1945	1905	40	4478	3563	0	2818	4143	0	0	0	0	0
857	2737	2917	2	0	0	P	W	0	1905	1934	29	3563	4478	0	4143	2818	0	0	0	0	0
857	2917	2737	2	0	0	W	P	0	1934	1905	29	4478	3563	0	2818	4143	0	0	0	0	0
858	2746	2926	1	0	1	P	W	0	1950	1927	23	2312	2819	0	3954	4274	0	0	0	0	0
858	2926	2746	1	0	1	W	P	0	1927	1950	23	2819	2312	0	4274	3954	0	0	0	0	0
859	2737	2916	1	0	0	P	W	0	1905	1930	25	3563	4478	0	4143	2818	0	0	0	0	0
859	2916	2737	1	0	0	W	P	0	1930	1905	25	4478	3563	0	2818	4143	0	0	0	0	0
860	2747	2926	1	0	1	P	W	0	1928	1927	1	2312	2819	0	3564	4274	0	0	0	0	0
860	2926	2747	1	0	1	W	P	0	1927	1928	1	2819	2312	0	4274	3564	0	0	0	0	0
861	2088	2266	1	0	0	P	P	1	1916	1908	8	2312	3022	0	2123	3023	0	0	1	2	1
861	2266	2088	1	0	0	P	P	1	1908	1916	8	3022	2312	0	3023	2123	0	1	1	2	1
862	2631	2809	1	0	1	P	W	0	1923	1950	27	3563	4478	0	3954	2818	0	0	0	0	0
862	2809	2631	1	0	1	W	P	0	1950	1923	27	4478	3563	0	2818	3954	0	0	0	0	0
863	2631	2807	1	0	1	P	W	0	1923	1948	25	3563	4478	0	3954	2818	0	0	0	0	0
863	2807	2631	1	0	1	W	P	0	1948	1923	25	4478	3563	0	2818	3954	0	0	0	0	0
864	2916	3090	1	0	1	W	W	1	1930	1955	25	4478	4394	0	2818	3178	0	0	0	0	0
864	3090	2916	1	0	1	W	W	1	1955	1930	25	4394	4478	0	3178	2818	0	0	0	0	0
865	2743	2916	1	0	1	P	W	0	1934	1930	4	3563	4478	0	3954	2818	0	0	0	0	0
865	2916	2743	1	0	1	W	P	0	1930	1934	4	4478	3563	0	2818	3954	0	0	0	0	0
866	2917	3090	1	0	1	W	W	1	1934	1955	21	4478	4394	0	2818	3178	0	0	0	0	0
866	3090	2917	1	0	1	W	W	1	1955	1934	21	4394	4478	0	3178	2818	0	0	0	0	0
867	2916	3088	3	0	1	W	W	1	1930	1948	18	4478	4394	0	2818	3178	0	0	0	0	0
867	3088	2916	3	0	1	W	W	1	1948	1930	18	4394	4478	0	3178	2818	0	0	0	0	0
868	2157	2328	1	0	1	P	W	0	1941	1918	23	3022	4161	0	2123	3178	0	0	0	0	0
868	2328	2157	1	0	1	W	P	0	1918	1941	23	4161	3022	0	3178	2123	0	0	0	0	0
869	2460	2631	1	0	1	W	P	0	1938	1923	15	4478	3563	0	2818	3954	0	0	0	0	0
869	2631	2460	1	0	1	P	W	0	1923	1938	15	3563	4478	0	3954	2818	0	0	0	0	0
870	2746	2917	1	0	1	P	W	0	1950	1934	16	2312	4478	0	3954	2818	0	0	0	0	0
870	2917	2746	1	0	1	W	P	0	1934	1950	16	4478	2312	0	2818	3954	0	0	0	0	0
871	2917	3088	3	0	1	W	W	1	1934	1948	14	4478	4394	0	2818	3178	0	0	0	0	0
871	3088	2917	3	0	1	W	W	1	1948	1934	14	4394	4478	0	3178	2818	0	0	0	0	0
872	2746	2916	1	0	1	P	W	0	1950	1930	20	2312	4478	0	3954	2818	0	0	0	0	0
872	2916	2746	1	0	1	W	P	0	1930	1950	20	4478	2312	0	2818	3954	0	0	0	0	0
873	2747	2917	2	0	1	P	W	0	1928	1934	6	2312	4478	0	3564	2818	0	0	0	0	0
873	2917	2747	2	0	1	W	P	0	1934	1928	6	4478	2312	0	2818	3564	0	0	0	0	0
874	2918	3088	3	0	1	W	W	1	1945	1948	3	4478	4394	0	2818	3178	0	0	0	0	0
874	3088	2918	3	0	1	W	W	1	1948	1945	3	4394	4478	0	3178	2818	0	0	0	0	0
875	2747	2916	1	0	1	P	W	0	1928	1930	2	2312	4478	0	3564	2818	0	0	0	0	0
875	2916	2747	1	0	1	W	P	0	1930	1928	2	4478	2312	0	2818	3564	0	0	0	0	0
876	2916	3085	2	0	0	W	W	1	1930	1913	17	4478	4394	0	2818	4395	0	0	0	0	0
876	3085	2916	2	0	0	W	W	1	1913	1930	17	4394	4478	0	4395	2818	0	0	0	0	0
877	2919	3088	1	0	1	W	W	1	1953	1948	5	4478	4394	0	2818	3178	0	0	0	0	0
877	3088	2919	1	0	1	W	W	1	1948	1953	5	4394	4478	0	3178	2818	0	0	0	0	0
879	2916	3084	1	0	1	W	W	1	1930	1939	9	4478	4159	0	2818	3178	0	0	1	1	1
879	3084	2916	1	0	1	W	W	1	1939	1930	9	4159	4478	0	3178	2818	0	1	1	1	1
880	2917	3085	3	0	0	W	W	1	1934	1913	21	4478	4394	0	2818	4395	0	0	0	0	0
880	3085	2917	3	0	0	W	W	1	1913	1934	21	4394	4478	0	4395	2818	0	0	0	0	0
881	2917	3084	2	0	1	W	W	1	1934	1939	5	4478	4159	0	2818	3178	0	0	0	0	0
881	3084	2917	2	0	1	W	W	1	1939	1934	5	4159	4478	0	3178	2818	0	0	0	0	0
882	2918	3085	3	0	0	W	W	1	1945	1913	32	4478	4394	0	2818	4395	0	0	0	0	0
882	3085	2918	3	0	0	W	W	1	1913	1945	32	4394	4478	0	4395	2818	0	0	0	0	0
883	2918	3084	1	0	1	W	W	1	1945	1939	6	4478	4159	0	2818	3178	0	0	0	0	0
883	3084	2918	1	0	1	W	W	1	1939	1945	6	4159	4478	0	3178	2818	0	0	0	0	0
884	2919	3085	1	0	0	W	W	1	1953	1913	40	4478	4394	0	2818	4395	0	0	0	0	0
884	3085	2919	1	0	0	W	W	1	1913	1953	40	4394	4478	0	4395	2818	0	0	0	0	0
885	2919	3084	1	0	1	W	W	1	1953	1939	14	4478	4159	0	2818	3178	0	0	0	0	0
885	3084	2919	1	0	1	W	W	1	1939	1953	14	4159	4478	0	3178	2818	0	0	0	0	0
886	3045	3210	1	0	1	W	W	1	1945	1960	15	3586	4478	0	3956	2818	0	0	0	0	0
886	3210	3045	1	0	1	W	W	1	1960	1945	15	4478	3586	0	2818	3956	0	0	0	0	0
887	2926	3090	1	0	1	W	W	1	1927	1955	28	2819	4394	0	4274	3178	0	0	0	0	0
887	3090	2926	1	0	1	W	W	1	1955	1927	28	4394	2819	0	3178	4274	0	0	0	0	0
888	3045	3208	1	0	1	W	W	1	1945	1954	9	3586	4478	0	3956	2818	0	0	0	0	0
888	3208	3045	1	0	1	W	W	1	1954	1945	9	4478	3586	0	2818	3956	0	0	0	0	0
889	2926	3088	3	0	1	W	W	1	1927	1948	21	2819	4394	0	4274	3178	0	0	0	0	1
889	3088	2926	3	0	1	W	W	1	1948	1927	21	4394	2819	0	3178	4274	0	1	0	0	1
890	2013	2172	1	0	1	G	G	1	1934	1936	2	2006	4271	0	4280	5143	0	1	0	0	1
890	2172	2013	1	0	1	G	G	1	1936	1934	2	4271	2006	0	5143	4280	0	1	0	0	1
891	2120	2279	1	0	1	P	P	1	1946	1924	22	2312	2294	0	3564	2311	0	0	0	0	0
891	2279	2120	1	0	1	P	P	1	1924	1946	22	2294	2312	0	2311	3564	0	0	0	0	0
892	2926	3085	1	0	0	W	W	1	1927	1913	14	2819	4394	0	4274	4395	0	0	0	0	0
892	3085	2926	1	0	0	W	W	1	1913	1927	14	4394	2819	0	4395	4274	0	0	0	0	0
893	2926	3084	1	0	1	W	W	1	1927	1939	12	2819	4159	0	4274	3178	0	0	0	0	0
893	3084	2926	1	0	1	W	W	1	1939	1927	12	4159	2819	0	3178	4274	0	0	0	0	0
894	3045	3200	1	0	1	W	W	1	1945	1956	11	3586	4478	0	3956	2818	0	0	0	0	0
894	3200	3045	1	0	1	W	W	1	1956	1945	11	4478	3586	0	2818	3956	0	0	0	0	0
895	2040	2194	1	0	1	W	W	1	1939	1950	11	3586	4478	0	3956	4274	0	0	0	0	0
895	2194	2040	1	0	1	W	W	1	1950	1939	11	4478	3586	0	4274	3956	0	0	0	0	0
896	2125	2279	1	0	1	P	P	1	1912	1924	12	2312	2294	0	2123	2311	0	1	0	0	1
896	2279	2125	1	0	1	P	P	0	1924	1912	12	2294	2312	0	2311	2123	0	1	0	0	1
897	2631	2784	1	0	0	P	G	0	1923	1896	27	3563	3566	0	3954	3565	0	0	0	0	0
897	2784	2631	1	0	0	G	P	0	1896	1923	27	3566	3563	0	3565	3954	0	0	0	0	0
898	2699	2852	1	0.0625	1	P	W	0	1937	1946	9	3563	3022	0	3954	2123	0	0	0	0	0
898	2852	2699	1	0.0625	1	W	P	0	1946	1937	9	3022	3563	0	2123	3954	0	0	0	0	0
899	2784	2936	2	0.5	1	G	G	1	1896	1934	38	3566	3566	1	3565	3564	0	0	0	0	0
899	2936	2784	2	0.5	1	G	G	1	1934	1896	38	3566	3566	1	3564	3565	0	0	0	0	0
900	2046	2194	1	0	1	W	W	1	1927	1950	23	3586	4478	0	3178	4274	0	0	0	0	0
900	2194	2046	1	0	1	W	W	1	1950	1927	23	4478	3586	0	4274	3178	0	0	0	0	0
901	2279	2426	1	0	1	P	W	0	1924	1942	18	2294	3953	0	2311	3178	0	0	0	0	0
901	2426	2279	1	0	1	W	P	0	1942	1924	18	3953	2294	0	3178	2311	0	0	0	0	0
902	2026	2172	1	0	1	G	G	1	1940	1936	4	3731	4271	0	3711	5143	0	1	1	1	1
902	2172	2026	1	0	1	G	G	1	1936	1940	4	4271	3731	0	5143	3711	0	0	1	1	1
904	2050	2194	1	0	1	W	W	1	1948	1950	2	3586	4478	0	3956	4274	0	0	0	0	0
904	2194	2050	1	0	1	W	W	1	1950	1948	2	4478	3586	0	4274	3956	0	0	0	0	0
905	2783	2926	1	0	1	W	W	1	1933	1927	6	4478	2819	0	2818	4274	0	0	0	0	1
905	2926	2783	1	0	1	W	W	1	1927	1933	6	2819	4478	0	4274	2818	0	1	0	0	1
906	2543	2685	1	0	1	W	P	0	1921	1928	7	4161	3563	0	3178	3954	0	0	0	0	0
906	2685	2543	1	0	1	P	W	0	1928	1921	7	3563	4161	0	3954	3178	0	0	0	0	0
907	2125	2266	1	0	0	P	P	1	1912	1908	4	2312	3022	0	2123	3023	0	0	1	1	1
907	2266	2125	1	0	0	P	P	0	1908	1912	4	3022	2312	0	3023	2123	0	1	1	1	1
908	2057	2194	1	0	1	W	W	1	1951	1950	1	3586	4478	0	3956	4274	0	0	0	0	0
908	2194	2057	1	0	1	W	W	1	1950	1951	1	4478	3586	0	4274	3956	0	0	0	0	0
909	2685	2822	3	0	1	P	G	0	1928	1915	13	3563	3814	0	3954	5156	0	1	0	0	1
909	2822	2685	3	0	1	G	P	0	1915	1928	13	3814	3563	0	5156	3954	0	0	0	0	1
910	2783	2919	1	0.375	1	W	W	1	1933	1953	20	4478	4478	1	2818	2818	1		0	0	0
910	2919	2783	1	0.375	1	W	W	1	1953	1933	20	4478	4478	1	2818	2818	1	0	0	0	0
911	2783	2918	1	0.375	1	W	W	1	1933	1945	12	4478	4478	1	2818	2818	1		0	0	0
911	2918	2783	1	0.375	1	W	W	1	1945	1933	12	4478	4478	1	2818	2818	1	0	0	0	0
912	2194	2328	1	0	1	W	W	1	1950	1918	32	4478	4161	0	4274	3178	0	0	0	0	0
912	2328	2194	1	0	1	W	W	1	1918	1950	32	4161	4478	0	3178	4274	0	0	0	0	0
913	2783	2917	1	0.375	1	W	W	1	1933	1934	1	4478	4478	1	2818	2818	1		1	1	1
913	2917	2783	1	0.375	1	W	W	1	1934	1933	1	4478	4478	1	2818	2818	1		1	1	1
914	2783	2916	1	0.375	1	W	W	1	1933	1930	3	4478	4478	1	2818	2818	1		1	5	1
914	2916	2783	1	0.375	1	W	W	1	1930	1933	3	4478	4478	1	2818	2818	1		1	5	1
915	2784	2917	1	0	0	G	W	0	1896	1934	38	3566	4478	0	3565	2818	0	0	0	0	0
915	2917	2784	1	0	0	W	G	0	1934	1896	38	4478	3566	0	2818	3565	0	0	0	0	0
916	2328	2460	2	0	1	W	W	1	1918	1938	20	4161	4478	0	3178	2818	0	0	0	0	0
916	2460	2328	2	0	1	W	W	1	1938	1918	20	4478	4161	0	2818	3178	0	0	0	0	0
917	2149	2279	1	0	1	P	P	1	1930	1924	6	2145	2294	0	3178	2311	0	0	0	0	0
917	2279	2149	1	0	1	P	P	1	1924	1930	6	2294	2145	0	2311	3178	0	0	0	0	0
918	2426	2556	3	0.25	1	W	W	1	1942	1940	2	3953	3953	1	3178	3178	1	0	0	0	0
918	2556	2426	3	0.25	1	W	W	1	1940	1942	2	3953	3953	1	3178	3178	1	0	0	0	0
919	2743	2872	1	0	1	P	G	0	1934	1916	18	3563	2857	0	3954	5143	0	0	0	0	0
919	2872	2743	1	0	1	G	P	0	1916	1934	18	2857	3563	0	5143	3954	0	0	0	0	0
920	2787	2916	1	0.5	1	W	W	1	1888	1930	42	4478	4478	1	4479	2818	0	0	0	0	0
920	2916	2787	1	0.5	1	W	W	1	1930	1888	42	4478	4478	1	2818	4479	0		0	0	0
921	2916	3045	1	0	1	W	W	1	1930	1945	15	4478	3586	0	2818	3956	0	0	0	0	0
921	3045	2916	1	0	1	W	W	1	1945	1930	15	3586	4478	0	3956	2818	0	0	0	0	0
922	2917	3045	2	0	1	W	W	1	1934	1945	11	4478	3586	0	2818	3956	0	0	0	0	0
922	3045	2917	2	0	1	W	W	1	1945	1934	11	3586	4478	0	3956	2818	0	0	0	0	0
923	2026	2153	2	0	1	G	P	0	1940	1936	4	3731	2145	0	3711	3178	0	0	0	0	0
923	2153	2026	2	0	1	P	G	0	1936	1940	4	2145	3731	0	3178	3711	0	0	0	0	0
924	2791	2918	1	0	1	W	W	1	1936	1945	9	3953	4478	0	3956	2818	0	0	0	0	0
924	2918	2791	1	0	1	W	W	1	1945	1936	9	4478	3953	0	2818	3956	0	0	0	0	0
925	2918	3045	1	0	1	W	W	1	1945	1945	0	4478	3586	0	2818	3956	0	0	0	0	0
925	3045	2918	1	0	1	W	W	1	1945	1945	0	3586	4478	0	3956	2818	0	0	0	0	0
926	2919	3045	1	0	1	W	W	1	1953	1945	8	4478	3586	0	2818	3956	0	0	0	0	0
926	3045	2919	1	0	1	W	W	1	1945	1953	8	3586	4478	0	3956	2818	0	0	0	0	0
927	3084	3210	1	0	1	W	W	1	1939	1960	21	4159	4478	0	3178	2818	0	1	0	0	1
927	3210	3084	1	0	1	W	W	1	1960	1939	21	4478	4159	0	2818	3178	0	0	0	0	1
928	2791	2916	1	0	1	W	W	1	1936	1930	6	3953	4478	0	3956	2818	0	0	0	0	0
928	2916	2791	1	0	1	W	W	1	1930	1936	6	4478	3953	0	2818	3956	0	0	0	0	0
929	3085	3210	1	0	0	W	W	1	1913	1960	47	4394	4478	0	4395	2818	0	0	0	0	0
929	3210	3085	1	0	0	W	W	1	1960	1913	47	4478	4394	0	2818	4395	0	0	0	0	0
930	3084	3208	1	0	1	W	W	1	1939	1954	15	4159	4478	0	3178	2818	0	1	0	0	1
930	3208	3084	1	0	1	W	W	1	1954	1939	15	4478	4159	0	2818	3178	0	0	0	0	1
931	2620	2743	1	0	1	G	P	0	1919	1934	15	3566	3563	0	5143	3954	0	0	0	0	0
931	2743	2620	1	0	1	P	G	0	1934	1919	15	3563	3566	0	3954	5143	0	0	0	0	0
932	2699	2822	2	0	1	P	G	0	1937	1915	22	3563	3814	0	3954	5156	0	0	0	0	0
932	2822	2699	2	0	1	G	P	0	1915	1937	22	3814	3563	0	5156	3954	0	0	0	0	0
933	3085	3208	1	0	0	W	W	1	1913	1954	41	4394	4478	0	4395	2818	0	0	0	0	0
933	3208	3085	1	0	0	W	W	1	1954	1913	41	4478	4394	0	2818	4395	0	0	0	0	0
934	2157	2279	1	0	1	P	P	1	1941	1924	17	3022	2294	0	2123	2311	0	0	0	0	0
934	2279	2157	1	0	1	P	P	1	1924	1941	17	2294	3022	0	2311	2123	0	0	0	0	0
935	3088	3210	1	0	1	W	W	1	1948	1960	12	4394	4478	0	3178	2818	0	0	0	0	0
935	3210	3088	1	0	1	W	W	1	1960	1948	12	4478	4394	0	2818	3178	0	0	0	0	0
936	2158	2279	1	0	1	B	P	0	1926	1924	2	2312	2294	0	2123	2311	0	0	1	1	1
936	2279	2158	1	0	1	P	B	0	1924	1926	2	2294	2312	0	2311	2123	0	1	1	1	1
937	2159	2279	1	0	0	B	P	0	1892	1924	32	2312	2294	0	2313	2311	0	0	0	0	1
937	2279	2159	1	0	0	P	B	0	1924	1892	32	2294	2312	0	2311	2313	0	1	0	0	1
938	2806	2926	2	0	1	W	W	1	1942	1927	15	4478	2819	0	2818	4274	0	1	0	0	1
938	2926	2806	2	0	1	W	W	1	1927	1942	15	2819	4478	0	4274	2818	0	0	0	0	1
939	3088	3208	1	0	1	W	W	1	1948	1954	6	4394	4478	0	3178	2818	0	0	0	0	0
939	3208	3088	1	0	1	W	W	1	1954	1948	6	4478	4394	0	2818	3178	0	0	0	0	0
940	2807	2926	3	0	1	W	W	1	1948	1927	21	4478	2819	0	2818	4274	0	0	0	0	0
940	2926	2807	3	0	1	W	W	1	1927	1948	21	2819	4478	0	4274	2818	0	0	0	0	0
941	2926	3045	1	0	1	W	W	1	1927	1945	18	2819	3586	0	4274	3956	0	0	0	0	0
941	3045	2926	1	0	1	W	W	1	1945	1927	18	3586	2819	0	3956	4274	0	0	0	0	0
942	2040	2157	2	0	1	W	P	0	1939	1941	2	3586	3022	0	3956	2123	0	0	0	0	0
942	2157	2040	2	0	1	P	W	0	1941	1939	2	3022	3586	0	2123	3956	0	0	0	0	0
943	2077	2194	1	0	1	W	W	1	1945	1950	5	3953	4478	0	3956	4274	0	0	0	0	0
943	2194	2077	1	0	1	W	W	1	1950	1945	5	4478	3953	0	4274	3956	0	0	0	0	0
944	2149	2266	1	0	0	P	P	1	1930	1908	22	2145	3022	0	3178	3023	0	0	0	0	0
944	2266	2149	1	0	0	P	P	1	1908	1930	22	3022	2145	0	3023	3178	0	0	0	0	0
945	2426	2543	2	0.109375	1	W	W	1	1942	1921	21	3953	4161	0	3178	3178	1	0	0	0	0
945	2543	2426	2	0.109375	1	W	W	1	1921	1942	21	4161	3953	0	3178	3178	1	0	0	0	0
946	2809	2926	2	0	1	W	W	1	1950	1927	23	4478	2819	0	2818	4274	0	0	0	0	0
946	2926	2809	2	0	1	W	W	1	1927	1950	23	2819	4478	0	4274	2818	0	0	0	0	0
947	2631	2747	5	0.09375	1	P	P	1	1923	1928	5	3563	2312	0	3954	3564	0	1	0	0	1
947	2747	2631	5	0.09375	1	P	P	1	1928	1923	5	2312	3563	0	3564	3954	0	1	0	0	1
948	3084	3200	1	0	1	W	W	1	1939	1956	17	4159	4478	0	3178	2818	0	1	0	0	1
948	3200	3084	1	0	1	W	W	1	1956	1939	17	4478	4159	0	2818	3178	0	0	0	0	1
949	2631	2746	1	0.296875	1	P	P	1	1923	1950	27	3563	2312	0	3954	3954	1	0	0	0	0
949	2746	2631	1	0.296875	1	P	P	1	1950	1923	27	2312	3563	0	3954	3954	1	0	0	0	0
950	2801	2916	1	0.25	1	W	W	1	1913	1930	17	4478	4478	1	2815	2818	0		1	1	1
950	2916	2801	1	0.25	1	W	W	1	1930	1913	17	4478	4478	1	2818	2815	0		1	1	1
951	2811	2926	1	0	1	W	W	1	1954	1927	27	4478	2819	0	2818	4274	0	1	0	0	1
951	2926	2811	1	0	1	W	W	1	1927	1954	27	2819	4478	0	4274	2818	0	0	0	0	1
952	3085	3200	1	0	0	W	W	1	1913	1956	43	4394	4478	0	4395	2818	0	0	0	0	0
952	3200	3085	1	0	0	W	W	1	1956	1913	43	4478	4394	0	2818	4395	0	0	0	0	0
953	2040	2153	1	0.125	1	W	P	0	1939	1936	3	3586	2145	0	3956	3178	0	0	1	2	1
953	2153	2040	1	0.125	1	P	W	0	1936	1939	3	2145	3586	0	3178	3956	0	1	1	2	1
954	2081	2194	1	0	1	W	W	1	1920	1950	30	3953	4478	0	4176	4274	0	0	0	0	0
954	2194	2081	1	0	1	W	W	1	1950	1920	30	4478	3953	0	4274	4176	0	0	0	0	0
955	2806	2919	1	0.25	1	W	W	1	1942	1953	11	4478	4478	1	2818	2818	1	0	0	0	0
955	2919	2806	1	0.25	1	W	W	1	1953	1942	11	4478	4478	1	2818	2818	1	0	0	0	0
956	2631	2743	3	0.5	1	P	P	1	1923	1934	11	3563	3563	1	3954	3954	1	0	0	0	0
956	2743	2631	3	0.5	1	P	P	1	1934	1923	11	3563	3563	1	3954	3954	1	0	0	0	0
957	2806	2918	2	0.25	1	W	W	1	1942	1945	3	4478	4478	1	2818	2818	1	0	0	0	0
957	2918	2806	2	0.25	1	W	W	1	1945	1942	3	4478	4478	1	2818	2818	1	0	0	0	0
958	2807	2919	1	0.25	1	W	W	1	1948	1953	5	4478	4478	1	2818	2818	1	0	0	0	0
958	2919	2807	1	0.25	1	W	W	1	1953	1948	5	4478	4478	1	2818	2818	1	0	0	0	0
959	3088	3200	2	0	1	W	W	1	1948	1956	8	4394	4478	0	3178	2818	0	0	0	0	0
959	3200	3088	2	0	1	W	W	1	1956	1948	8	4478	4394	0	2818	3178	0	0	0	0	0
960	2046	2157	1	0	1	W	P	0	1927	1941	14	3586	3022	0	3178	2123	0	0	0	0	0
960	2157	2046	1	0	1	P	W	0	1941	1927	14	3022	3586	0	2123	3178	0	0	0	0	0
961	2083	2194	1	0	1	W	W	1	1944	1950	6	3953	4478	0	3178	4274	0	0	0	0	0
961	2194	2083	1	0	1	W	W	1	1950	1944	6	4478	3953	0	4274	3178	0	0	0	0	0
962	2806	2917	2	0.25	1	W	W	1	1942	1934	8	4478	4478	1	2818	2818	1	0	1	1	1
962	2917	2806	2	0.25	1	W	W	1	1934	1942	8	4478	4478	1	2818	2818	1		1	1	1
963	2807	2918	3	0.25	1	W	W	1	1948	1945	3	4478	4478	1	2818	2818	1	0	1	1	1
963	2918	2807	3	0.25	1	W	W	1	1945	1948	3	4478	4478	1	2818	2818	1	0	1	1	1
964	2699	2809	1	0	1	P	W	0	1937	1950	13	3563	4478	0	3954	2818	0	0	0	0	0
964	2809	2699	1	0	1	W	P	0	1950	1937	13	4478	3563	0	2818	3954	0	0	0	0	0
965	2806	2916	3	0.25	1	W	W	1	1942	1930	12	4478	4478	1	2818	2818	1	0	1	3	1
965	2916	2806	3	0.25	1	W	W	1	1930	1942	12	4478	4478	1	2818	2818	1		1	3	1
966	2807	2917	3	0.25	1	W	W	1	1948	1934	14	4478	4478	1	2818	2818	1	0	0	0	0
966	2917	2807	3	0.25	1	W	W	1	1934	1948	14	4478	4478	1	2818	2818	1		0	0	0
967	2809	2919	1	0.25	1	W	W	1	1950	1953	3	4478	4478	1	2818	2818	1	0	0	0	0
967	2919	2809	1	0.25	1	W	W	1	1953	1950	3	4478	4478	1	2818	2818	1	0	0	0	0
968	3090	3200	1	0	1	W	W	1	1955	1956	1	4394	4478	0	3178	2818	0	0	0	0	0
968	3200	3090	1	0	1	W	W	1	1956	1955	1	4478	4394	0	2818	3178	0	0	0	0	0
969	2085	2194	1	0	1	W	W	1	1949	1950	1	3953	4478	0	3178	4274	0	0	0	0	0
969	2194	2085	1	0	1	W	W	1	1950	1949	1	4478	3953	0	4274	3178	0	0	0	0	0
970	2807	2916	3	0.25	1	W	W	1	1948	1930	18	4478	4478	1	2818	2818	1	1	1	3	1
970	2916	2807	3	0.25	1	W	W	1	1930	1948	18	4478	4478	1	2818	2818	1		1	3	1
971	2809	2918	1	0.25	1	W	W	1	1950	1945	5	4478	4478	1	2818	2818	1	0	0	0	0
971	2918	2809	1	0.25	1	W	W	1	1945	1950	5	4478	4478	1	2818	2818	1	0	0	0	0
972	2158	2266	1	0	0	B	P	0	1926	1908	18	2312	3022	0	2123	3023	0	0	0	0	1
972	2266	2158	1	0	0	P	B	0	1908	1926	18	3022	2312	0	3023	2123	0	1	0	0	1
973	2699	2807	1	0	1	P	W	0	1937	1948	11	3563	4478	0	3954	2818	0	0	0	0	0
973	2807	2699	1	0	1	W	P	0	1948	1937	11	4478	3563	0	2818	3954	0	0	0	0	0
974	2809	2917	2	0.25	1	W	W	1	1950	1934	16	4478	4478	1	2818	2818	1	0	0	0	0
974	2917	2809	2	0.25	1	W	W	1	1934	1950	16	4478	4478	1	2818	2818	1		0	0	0
975	2811	2919	1	0.3125	1	W	W	1	1954	1953	1	4478	4478	1	2818	2818	1	0	0	0	0
975	2919	2811	1	0.3125	1	W	W	1	1953	1954	1	4478	4478	1	2818	2818	1	0	0	0	0
977	2050	2157	1	0	1	W	P	0	1948	1941	7	3586	3022	0	3956	2123	0	0	0	0	0
977	2157	2050	1	0	1	P	W	0	1941	1948	7	3022	3586	0	2123	3956	0	0	0	0	0
978	2159	2266	1	0	0	B	P	0	1892	1908	16	2312	3022	0	2313	3023	0	0	0	0	1
978	2266	2159	1	0	0	P	B	0	1908	1892	16	3022	2312	0	3023	2313	0	1	0	0	1
979	2809	2916	2	0.25	1	W	W	1	1950	1930	20	4478	4478	1	2818	2818	1	0	0	0	0
979	2916	2809	2	0.25	1	W	W	1	1930	1950	20	4478	4478	1	2818	2818	1		0	0	0
980	2811	2918	1	0.3125	1	W	W	1	1954	1945	9	4478	4478	1	2818	2818	1	0	0	0	0
980	2918	2811	1	0.3125	1	W	W	1	1945	1954	9	4478	4478	1	2818	2818	1	0	0	0	0
981	2631	2737	6	0.5	1	P	P	1	1923	1905	18	3563	3563	1	3954	4143	0	0	0	0	0
981	2737	2631	6	0.5	1	P	P	1	1905	1923	18	3563	3563	1	4143	3954	0	0	0	0	0
982	2746	2852	1	0.078125	1	P	W	0	1950	1946	4	2312	3022	0	3954	2123	0	0	0	0	0
982	2852	2746	1	0.078125	1	W	P	0	1946	1950	4	3022	2312	0	2123	3954	0	0	0	0	0
983	2811	2917	1	0.3125	1	W	W	1	1954	1934	20	4478	4478	1	2818	2818	1	0	0	0	0
983	2917	2811	1	0.3125	1	W	W	1	1934	1954	20	4478	4478	1	2818	2818	1	0	0	0	0
984	2747	2852	1	0.09375	1	P	W	0	1928	1946	18	2312	3022	0	3564	2123	0	0	0	0	1
984	2852	2747	1	0.09375	1	W	P	0	1946	1928	18	3022	2312	0	2123	3564	0	1	0	0	1
985	2811	2916	1	0.3125	1	W	W	1	1954	1930	24	4478	4478	1	2818	2818	1	0	0	0	0
985	2916	2811	1	0.3125	1	W	W	1	1930	1954	24	4478	4478	1	2818	2818	1	0	0	0	0
986	2822	2926	1	0	1	G	W	0	1915	1927	12	3814	2819	0	5156	4274	0	0	0	0	0
986	2926	2822	1	0	1	W	G	0	1927	1915	12	2819	3814	0	4274	5156	0	0	0	0	0
987	2743	2844	1	0	1	P	G	0	1934	1911	23	3563	2857	0	3954	5143	0	0	0	0	0
987	2844	2743	1	0	1	G	P	0	1911	1934	23	2857	3563	0	5143	3954	0	0	0	0	0
988	2685	2784	2	0	0	P	G	0	1928	1896	32	3563	3566	0	3954	3565	0	0	0	0	0
988	2784	2685	2	0	0	G	P	0	1896	1928	32	3566	3563	0	3565	3954	0	0	0	0	0
989	2328	2426	4	0.109375	1	W	W	1	1918	1942	24	4161	3953	0	3178	3178	1	0	0	0	0
989	2426	2328	4	0.109375	1	W	W	1	1942	1918	24	3953	4161	0	3178	3178	1	0	0	0	0
990	2460	2556	3	0	1	W	W	1	1938	1940	2	4478	3953	0	2818	3178	0	0	0	0	0
990	2556	2460	3	0	1	W	W	1	1940	1938	2	3953	4478	0	3178	2818	0	0	0	0	0
991	2040	2135	1	0.125	1	W	P	0	1939	1911	28	3586	2312	0	3956	3178	0	0	0	0	0
991	2135	2040	1	0.125	1	P	W	0	1911	1939	28	2312	3586	0	3178	3956	0	0	0	0	0
992	2822	2916	1	0	1	G	W	0	1915	1930	15	3814	4478	0	5156	2818	0	0	0	0	0
992	2916	2822	1	0	1	W	G	0	1930	1915	15	4478	3814	0	2818	5156	0	0	0	0	0
993	2070	2159	2	0	0	W	B	0	1900	1892	8	3953	2312	0	3954	2313	0	0	0	0	1
993	2159	2070	2	0	0	B	W	0	1892	1900	8	2312	3953	0	2313	3954	0	1	0	0	1
994	2040	2125	1	0	1	W	P	0	1939	1912	27	3586	2312	0	3956	2123	0	0	0	0	0
994	2125	2040	1	0	1	P	W	0	1912	1939	27	2312	3586	0	2123	3956	0	0	0	0	0
995	2458	2543	1	0.09375	1	W	W	1	1901	1921	20	3953	4161	0	4176	3178	0	0	1	1	1
995	2543	2458	1	0.09375	1	W	W	1	1921	1901	20	4161	3953	0	3178	4176	0	0	1	1	1
996	2699	2784	1	0	0	P	G	0	1937	1896	41	3563	3566	0	3954	3565	0	0	0	0	0
996	2784	2699	1	0	0	G	P	0	1896	1937	41	3566	3563	0	3565	3954	0	0	0	0	0
997	2737	2822	2	0	0	P	G	0	1905	1915	10	3563	3814	0	4143	5156	0	0	1	1	1
997	2822	2737	2	0	0	G	P	0	1915	1905	10	3814	3563	0	5156	4143	0	0	1	1	1
998	2458	2541	1	0.1875	1	W	W	1	1901	1900	1	3953	4161	0	4176	4176	1	0	0	0	0
998	2541	2458	1	0.1875	1	W	W	1	1900	1901	1	4161	3953	0	4176	4176	1	0	0	0	0
999	2040	2120	1	0	1	W	P	0	1939	1946	7	3586	2312	0	3956	3564	0	0	0	0	0
999	2120	2040	1	0	1	P	W	0	1946	1939	7	2312	3586	0	3564	3956	0	0	0	0	0
1000	2743	2822	3	0	1	P	G	0	1934	1915	19	3563	3814	0	3954	5156	0	0	0	0	0
1000	2822	2743	3	0	1	G	P	0	1915	1934	19	3814	3563	0	5156	3954	0	0	0	0	0
1001	2070	2146	1	0	0	W	P	0	1900	1912	12	3953	2145	0	3954	2144	0	0	0	0	0
1001	2146	2070	1	0	0	P	W	0	1912	1900	12	2145	3953	0	2144	3954	0	0	0	0	0
1002	2747	2822	1	0	1	P	G	0	1928	1915	13	2312	3814	0	3564	5156	0	0	0	0	0
1002	2822	2747	1	0	1	G	P	0	1915	1928	13	3814	2312	0	5156	3564	0	0	0	0	0
1003	2046	2120	1	0	1	W	P	0	1927	1946	19	3586	2312	0	3178	3564	0	0	0	0	0
1003	2120	2046	1	0	1	P	W	0	1946	1927	19	2312	3586	0	3564	3178	0	0	0	0	0
1004	2737	2811	1	0	0	P	W	0	1905	1954	49	3563	4478	0	4143	2818	0	0	0	0	0
1004	2811	2737	1	0	0	W	P	0	1954	1905	49	4478	3563	0	2818	4143	0	0	0	0	0
1005	2852	2926	1	0	1	W	W	1	1946	1927	19	3022	2819	0	2123	4274	0	0	0	0	0
1005	2926	2852	1	0	1	W	W	1	1927	1946	19	2819	3022	0	4274	2123	0	0	0	0	0
1006	2737	2809	1	0	0	P	W	0	1905	1950	45	3563	4478	0	4143	2818	0	0	0	0	0
1006	2809	2737	1	0	0	W	P	0	1950	1905	45	4478	3563	0	2818	4143	0	0	0	0	0
1007	2844	2916	1	0	1	G	W	0	1911	1930	19	2857	4478	0	5143	2818	0	0	0	0	0
1007	2916	2844	1	0	1	W	G	0	1930	1911	19	4478	2857	0	2818	5143	0	0	0	0	0
1008	2088	2159	6	0.25	1	P	B	0	1916	1892	24	2312	2312	1	2123	2313	0	0	0	0	0
1008	2159	2088	6	0.25	1	B	P	0	1892	1916	24	2312	2312	1	2313	2123	0	0	0	0	0
1009	2050	2120	1	0	1	W	P	0	1948	1946	2	3586	2312	0	3956	3564	0	0	0	0	0
1009	2120	2050	1	0	1	P	W	0	1946	1948	2	2312	3586	0	3564	3956	0	0	0	0	0
1010	2088	2158	3	0.25	1	P	B	0	1916	1926	10	2312	2312	1	2123	2123	1	0	0	0	0
1010	2158	2088	3	0.25	1	B	P	0	1926	1916	10	2312	2312	1	2123	2123	1	0	0	0	0
1011	2737	2807	1	0	0	P	W	0	1905	1948	43	3563	4478	0	4143	2818	0	0	0	0	0
1011	2807	2737	1	0	0	W	P	0	1948	1905	43	4478	3563	0	2818	4143	0	0	0	0	0
1012	2088	2157	1	0.25	1	P	P	1	1916	1941	25	2312	3022	0	2123	2123	1	0	0	0	1
1012	2157	2088	1	0.25	1	P	P	1	1941	1916	25	3022	2312	0	2123	2123	1	1	0	0	1
1013	2737	2806	1	0	0	P	W	0	1905	1942	37	3563	4478	0	4143	2818	0	0	0	0	0
1013	2806	2737	1	0	0	W	P	0	1942	1905	37	4478	3563	0	2818	4143	0	0	0	0	0
1014	2631	2699	6	0.5	1	P	P	1	1923	1937	14	3563	3563	1	3954	3954	1	0	0	0	0
1014	2699	2631	6	0.5	1	P	P	1	1937	1923	14	3563	3563	1	3954	3954	1	0	0	0	0
1015	2091	2157	1	0.125	1	P	P	1	1940	1941	1	2312	3022	0	3564	2123	0	0	0	0	1
1015	2157	2091	1	0.125	1	P	P	1	1941	1940	1	3022	2312	0	2123	3564	0	1	0	0	1
1016	2088	2153	1	0	1	P	P	1	1916	1936	20	2312	2145	0	2123	3178	0	0	0	0	0
1016	2153	2088	1	0	1	P	P	1	1936	1916	20	2145	2312	0	3178	2123	0	0	0	0	0
1017	2092	2157	1	0.125	1	W	P	0	1939	1941	2	2312	3022	0	3564	2123	0	0	0	0	1
1017	2157	2092	1	0.125	1	P	W	0	1941	1939	2	3022	2312	0	2123	3564	0	1	0	0	1
1018	2852	2917	1	0	1	W	W	1	1946	1934	12	3022	4478	0	2123	2818	0	0	0	0	0
1018	2917	2852	1	0	1	W	W	1	1934	1946	12	4478	3022	0	2818	2123	0	0	0	0	0
1019	2852	2916	1	0	1	W	W	1	1946	1930	16	3022	4478	0	2123	2818	0	0	0	0	0
1019	2916	2852	1	0	1	W	W	1	1930	1946	16	4478	3022	0	2818	2123	0	0	0	0	0
1020	2746	2809	1	0	1	P	W	0	1950	1950	0	2312	4478	0	3954	2818	0	0	0	0	0
1020	2809	2746	1	0	1	W	P	0	1950	1950	0	4478	2312	0	2818	3954	0	0	0	0	0
1021	2685	2747	4	0.09375	1	P	P	1	1928	1928	0	3563	2312	0	3954	3564	0	1	0	0	1
1021	2747	2685	4	0.09375	1	P	P	1	1928	1928	0	2312	3563	0	3564	3954	0	1	0	0	1
1022	2747	2809	1	0	1	P	W	0	1928	1950	22	2312	4478	0	3564	2818	0	0	0	0	0
1022	2809	2747	1	0	1	W	P	0	1950	1928	22	4478	2312	0	2818	3564	0	0	0	0	0
1023	2088	2149	1	0	1	P	P	1	1916	1930	14	2312	2145	0	2123	3178	0	0	0	0	0
1023	2149	2088	1	0	1	P	P	1	1930	1916	14	2145	2312	0	3178	2123	0	0	0	0	0
1024	2685	2746	1	0.296875	1	P	P	1	1928	1950	22	3563	2312	0	3954	3954	1	0	0	0	0
1024	2746	2685	1	0.296875	1	P	P	1	1950	1928	22	2312	3563	0	3954	3954	1	0	0	0	0
1025	2746	2807	1	0	1	P	W	0	1950	1948	2	2312	4478	0	3954	2818	0	0	0	0	0
1025	2807	2746	1	0	1	W	P	0	1948	1950	2	4478	2312	0	2818	3954	0	0	0	0	0
1026	2088	2148	2	0	1	P	G	0	1916	1927	11	2312	2145	0	2123	3178	0	0	0	0	0
1026	2148	2088	2	0	1	G	P	0	1927	1916	11	2145	2312	0	3178	2123	0	0	0	0	0
1027	2747	2807	1	0	1	P	W	0	1928	1948	20	2312	4478	0	3564	2818	0	0	0	0	0
1027	2807	2747	1	0	1	W	P	0	1948	1928	20	4478	2312	0	2818	3564	0	0	0	0	0
1028	2784	2844	1	0	0	G	G	1	1896	1911	15	3566	2857	0	3565	5143	0	0	1	1	1
1028	2844	2784	1	0	0	G	G	1	1911	1896	15	2857	3566	0	5143	3565	0	0	1	1	1
1030	2040	2099	1	0.0625	1	W	P	0	1939	1946	7	3586	2312	0	3956	3564	0	0	0	0	0
1030	2099	2040	1	0.0625	1	P	W	0	1946	1939	7	2312	3586	0	3564	3956	0	0	0	0	0
1031	2098	2157	1	0.03125	1	B	P	0	1944	1941	3	2312	3022	0	3564	2123	0	0	0	0	0
1031	2157	2098	1	0.03125	1	P	B	0	1941	1944	3	3022	2312	0	2123	3564	0	0	0	0	0
1032	2040	2098	1	0.0625	1	W	B	0	1939	1944	5	3586	2312	0	3956	3564	0	0	0	0	0
1032	2098	2040	1	0.0625	1	B	W	0	1944	1939	5	2312	3586	0	3564	3956	0	0	0	0	0
1033	2088	2146	4	0	0	P	P	1	1916	1912	4	2312	2145	0	2123	2144	0	0	1	1	1
1033	2146	2088	4	0	0	P	P	1	1912	1916	4	2145	2312	0	2144	2123	0	0	1	1	1
1034	2685	2743	3	0.5	1	P	P	1	1928	1934	6	3563	3563	1	3954	3954	1	0	0	0	0
1034	2743	2685	3	0.5	1	P	P	1	1934	1928	6	3563	3563	1	3954	3954	1	0	0	0	0
1037	2070	2125	1	0	0	W	P	0	1900	1912	12	3953	2312	0	3954	2123	0	0	0	0	0
1037	2125	2070	1	0	0	P	W	0	1912	1900	12	2312	3953	0	2123	3954	0	0	0	0	0
1038	2631	2685	7	0.5	1	P	P	1	1923	1928	5	3563	3563	1	3954	3954	1	0	0	0	0
1038	2685	2631	7	0.5	1	P	P	1	1928	1923	5	3563	3563	1	3954	3954	1	0	0	0	0
1039	2046	2099	1	0.125	1	W	P	0	1927	1946	19	3586	2312	0	3178	3564	0	0	0	0	0
1039	2099	2046	1	0.125	1	P	W	0	1946	1927	19	2312	3586	0	3564	3178	0	0	0	0	0
1040	2040	2092	1	0	1	W	W	1	1939	1939	0	3586	2312	0	3956	3564	0	0	0	0	0
1040	2092	2040	1	0	1	W	W	1	1939	1939	0	2312	3586	0	3564	3956	0	0	0	0	0
1041	2685	2737	8	0.5	1	P	P	1	1928	1905	23	3563	3563	1	3954	4143	0	0	0	0	0
1041	2737	2685	8	0.5	1	P	P	1	1905	1928	23	3563	3563	1	4143	3954	0	0	0	0	0
1043	2040	2091	1	0	1	W	P	0	1939	1940	1	3586	2312	0	3956	3564	0	0	0	0	0
1043	2091	2040	1	0	1	P	W	0	1940	1939	1	2312	3586	0	3564	3956	0	0	0	0	0
1044	2737	2787	1	0	0	P	W	0	1905	1888	17	3563	4478	0	4143	4479	0	0	0	0	0
1044	2787	2737	1	0	0	W	P	0	1888	1905	17	4478	3563	0	4479	4143	0	0	0	0	0
1045	2822	2872	1	0	1	G	G	1	1915	1916	1	3814	2857	0	5156	5143	0	0	0	0	0
1045	2872	2822	1	0	1	G	G	1	1916	1915	1	2857	3814	0	5143	5156	0	0	0	0	0
1046	2279	2328	1	0	1	P	W	0	1924	1918	6	2294	4161	0	2311	3178	0	0	1	1	1
1046	2328	2279	1	0	1	W	P	0	1918	1924	6	4161	2294	0	3178	2311	0	0	1	1	1
1047	2040	2088	1	0	1	W	P	0	1939	1916	23	3586	2312	0	3956	2123	0	0	0	0	0
1047	2088	2040	1	0	1	P	W	0	1916	1939	23	2312	3586	0	2123	3956	0	0	0	0	0
1048	2699	2747	5	0.09375	1	P	P	1	1937	1928	9	3563	2312	0	3954	3564	0	1	0	0	1
1048	2747	2699	5	0.09375	1	P	P	1	1928	1937	9	2312	3563	0	3564	3954	0	1	0	0	1
[truncated: 422 more rows]

## Sheet: Arranged Marriages r trunc
A dummy variable that allows one to block the data so that it is not duplicated	The unique ID given to any pair of men	The unique identification number given to every father	The unique identification number given to every father	The dates when this pair of men raided together	The unique ID number given to every individual (and in this case, this represents the child of Ego 1 referenced in Column C)	The unique ID number given to every individual (and in this case, this represents the child of Ego 2 referenced in Column D)	The unique marriage ID given to marriages arranged between the children of the two men referenced in Columns C & D	The genetic relatedness between the married couple referenced in Columns F & G	The number of raids the males in Column C & D participated together	A binary dummy variable asking the question: did the egos in Column C &D raid together (0=No; 1=Yes)	The year the marriage between Column F &G occurred	The year in which the pair of raiders in Columns C & D first raided	The number of year that lapsed between Column M & L
Half Sample	DyadID	Adult Ego 1	Adult Ego 2	Raid History between Adult Ego 1 & Adult Ego 2	Child (Ego 1)	Child (Ego 2)	Marriage ID	Child-spouse r	# Raids: Adult Ego 1 & Adult Ego 2	Adult Ego 1 & Adult Ego 2 Raided (0=No; 1=Yes)	Year: Children Marriage	Year of First Raid Between Warriors	Time between Year of First Raid and Children Marriage
1	26	2085	3757	1970	4060	4069	1	0.214844	1	1
2	26	3757	2085	1970	4069	4060	1	0.214844	1	1
1	58	3696	2328	1937, 1967	2491	2546	2	0.117188	2	1
2	58	2328	3696	1937, 1967	2546	2491	2	0.117188	2	1
1	130	2050	3090	1967, 1970	3997	4407	3	0.203125	2	1
2	130	3090	2050	1967, 1970	4407	3997	3	0.203125	2	1
1	130	2050	3090	1967, 1970	3997	4408	4	0.203125	2	1
2	130	3090	2050	1967, 1970	4408	3997	4	0.203125	2	1
1	136	2057	3088	1965, 1967, 1968	3189	3750	8	0.0546875	3	1
2	136	3088	2057	1965, 1967, 1968	3750	3189	8	0.0546875	3	1
1	346	2046	2791	1937, 1949	2057	2793	9	0.125	2	1	1968	1937	31
2	346	2791	2046	1937, 1949	2793	2057	9	0.125	2	1	1968	1937	31
1	346	2046	2791	1937, 1949	2066	2798	10	0.125	2	1
2	346	2791	2046	1937, 1949	2798	2066	10	0.125	2	1
1	358	2807	2077	1965, 1967	3668	3701	11	0.25	2	1
2	358	2077	2807	1965, 1967	3701	3668	11	0.25	2	1
1	358	2807	2077	1965, 1967	3668	3706	12	0.25	2	1
2	358	2077	2807	1965, 1967	3706	3668	12	0.25	2	1
1	358	2807	2077	1965, 1967	3672	3707	13	0.25	2	1
2	358	2077	2807	1965, 1967	3707	3672	13	0.25	2	1
1	430	2211	2872	1931, 1945	2215	2895	15	0.125	2	1
2	430	2872	2211	1931, 1945	2895	2215	15	0.125	2	1
1	493	2091	2699	1957	2633	2702	25	0.265625	1	1
2	493	2699	2091	1957	2702	2633	25	0.265625	1	1
1	496	2699	2092	1957	2701	2717	26	0.117188	1	1
2	496	2092	2699	1957	2717	2701	26	0.117188	1	1
1	498	2699	2098	1953, 1957	2704	2723	27	0.109375	2	1	1982	1953	29
2	498	2098	2699	1953, 1957	2723	2704	27	0.109375	2	1	1982	1953	29
1	529	2120	2699	1958, 1967	2433	2709	28	0.1875	2	1
2	529	2699	2120	1958, 1967	2709	2433	28	0.1875	2	1
1	573	2556	2050	1967, 1968, 1970	2585	3995	31	0.0859375	3	1
2	573	2050	2556	1967, 1968, 1970	3995	2585	31	0.0859375	3	1
1	617	2081	2543	1937	2085	3756	32	0.0546875	1	1	1967	1937	30
2	617	2543	2081	1937	3756	2085	32	0.0546875	1	1	1967	1937	30
1	625	2556	2099	1965	2586	3450	33	0.0625	1	1
2	625	2099	2556	1965	3450	2586	33	0.0625	1	1
1	625	2556	2099	1965	2588	3451	34	0.0625	1	1
2	625	2099	2556	1965	3451	2588	34	0.0625	1	1
1	625	2556	2099	1965	2587	3456	35	0.0625	1	1
2	625	2099	2556	1965	3456	2587	35	0.0625	1	1
1	629	2088	2543	1937	2632	5041	36	0	1	1
2	629	2543	2088	1937	5041	2632	36	0	1	1
1	787	3200	2926	1967, 1967	3676	3688	38	0.09375	2	1
2	787	2926	3200	1967, 1967	3688	3676	38	0.09375	2	1
1	806	2328	2076	1937	2549	2550	39	0	1	1
2	806	2076	2328	1937	2550	2549	39	0	1	1
1	812	2328	2081	1937, 1965, 1967	2555	2556	40	0.117188	3	1	1963	1937	26
2	812	2081	2328	1937, 1965, 1967	2556	2555	40	0.117188	3	1	1963	1937	26
1	879	3084	2916	1967	3095	4010	44	0.34375	1	1
2	879	2916	3084	1967	4010	3095	44	0.34375	1	1
1	902	2026	2172	1956	2033	2175	45	0.09375	1	1
2	902	2172	2026	1956	2175	2033	45	0.09375	1	1
1	913	2783	2917	1967	2941	4470	47	0.4375	1	1
2	913	2917	2783	1967	4470	2941	47	0.4375	1	1
1	914	2783	2916	1967	2938	3209	48	0.4375	1	1
2	914	2916	2783	1967	3209	2938	48	0.4375	1	1
1	914	2783	2916	1967	2939	3208	49	0.4375	1	1	1971	1967	4
2	914	2916	2783	1967	3208	2939	49	0.4375	1	1	1971	1967	4
1	914	2783	2916	1967	2940	3201	50	0.4375	1	1
2	914	2916	2783	1967	3201	2940	50	0.4375	1	1
1	914	2783	2916	1967	2940	3211	51	0.4375	1	1
2	914	2916	2783	1967	3211	2940	51	0.4375	1	1
1	914	2783	2916	1967	2942	3211	52	0.4375	1	1
2	914	2916	2783	1967	3211	2942	52	0.4375	1	1
1	936	2158	2279	1948	2168	2412	53	0.125	1	1
2	936	2279	2158	1948	2412	2168	53	0.125	1	1
1	950	2801	2916	1949	2807	3203	54	0.3125	1	1	1989	1949	40
2	950	2916	2801	1949	3203	2807	54	0.3125	1	1	1989	1949	40
1	953	2040	2153	1958	2041	3626	55	0.0625	1	1
2	953	2153	2040	1958	3626	2041	55	0.0625	1	1
1	953	2040	2153	1958	2043	3626	56	0.0625	1	1
2	953	2153	2040	1958	3626	2043	56	0.0625	1	1
1	962	2806	2917	1965, 1967	3069	3205	57	0.21875	2	1
2	962	2917	2806	1965, 1967	3205	3069	57	0.21875	2	1
1	963	2918	2807	1965, 1967, 1968	3218	3673	58	0.0625	3	1
2	963	2807	2918	1965, 1967, 1968	3673	3218	58	0.0625	3	1
1	965	2806	2916	1950, 1967, 1968	3065	3202	59	0.21875	3	1
2	965	2916	2806	1950, 1967, 1972	3202	3065	59	0.21875	3	1
1	965	2806	2916	1950, 1967, 1969	3066	3073	60	0.21875	3	1
2	965	2916	2806	1950, 1967, 1971	3073	3066	60	0.21875	3	1
1	965	2806	2916	1950, 1967, 1970	3067	3202	61	0.21875	3	1
2	965	2916	2806	1950, 1967, 1973	3202	3067	61	0.21875	3	1
1	970	2916	2807	1967, 1967, 1968	3200	3667	62	0.15625	3	1	1969	1967	2
2	970	2807	2916	1967, 1967, 1968	3667	3200	62	0.15625	3	1	1969	1967	2
1	970	2916	2807	1967, 1967, 1968	3200	3670	63	0.15625	3	1	1976	1967	9
2	970	2807	2916	1967, 1967, 1968	3670	3200	63	0.15625	3	1	1976	1967	9
1	970	2916	2807	1967, 1967, 1968	3210	3671	64	0.15625	3	1	1983	1967	16
2	970	2807	2916	1967, 1967, 1968	3671	3210	64	0.15625	3	1	1983	1967	16
1	995	2458	2543	1937	2493	3757	65	0.0546875	1	1	1969	1937	32
2	995	2543	2458	1937	3757	2493	65	0.0546875	1	1	1969	1937	32
1	1046	2328	2279	1967	2559	2560	69	0	1	1
2	1046	2279	2328	1967	2560	2559	69	0	1	1
1	1080	2836	2872	1949, 1956	2840	2881	70	0.1875	2	1
2	1080	2872	2836	1949, 1956	2881	2840	70	0.1875	2	1
1	1080	2836	2872	1949, 1956	2840	2882	71	0.1875	2	1
2	1080	2872	2836	1949, 1956	2882	2840	71	0.1875	2	1
1	1081	2081	2046	1937, 1949, 1965, 1967	2039	2040	72	0.15625	4	1	1961	1937	24
2	1081	2046	2081	1937, 1949, 1965, 1967	2040	2039	72	0.15625	4	1	1961	1937	24
1	1081	2046	2081	1937, 1949, 1965, 1967	2056	2083	73	0.15625	4	1	1961	1937	24
2	1081	2081	2046	1937, 1949, 1965, 1967	2083	2056	73	0.15625	4	1	1961	1937	24
1	1092	2046	2077	1965, 1967	2052	3709	74	0.125	2	1
2	1092	2077	2046	1965, 1967	3709	2052	74	0.125	2	1
1	1092	2046	2077	1965, 1967	2060	3191	75	0.125	2	1
2	1092	2077	2046	1965, 1967	3191	2060	75	0.125	2	1
1	1092	2046	2077	1965, 1967	2067	3198	76	0.125	2	1
2	1092	2077	2046	1965, 1967	3198	2067	76	0.125	2	1
1	1096	2057	2085	1965, 1967	3929	4058	77	0.0546875	2	1
2	1096	2085	2057	1965, 1967	4058	3929	77	0.0546875	2	1
1	1201	2844	2836	1945	3257	3258	79	0.25	1	1	1966	1945	21
2	1201	2836	2844	1945	3258	3257	79	0.25	1	1	1966	1945	21
1	1267	2013	2088		2358	2359	80	0	0	0
2	1267	2088	2013		2359	2358	80	0	0	0
1	1268	2013	2091		2228	2237	81	0	0	0
2	1268	2091	2013		2237	2228	81	0	0	0
1	1269	2026	2029		2030	2904	82	0.09375	0	0
2	1269	2029	2026		2904	2030	82	0.09375	0	0
1	1270	2283	2026		2345	2853	83	0.0234375	0	0
2	1270	2026	2283		2853	2345	83	0.0234375	0	0
1	1270	2283	2026		2343	3297	84	0.0234375	0	0
2	1270	2026	2283		3297	2343	84	0.0234375	0	0
1	1271	2046	2079		2064	3194	85	0.125	0	0
2	1271	2079	2046		3194	2064	85	0.125	0	0
1	1274	2046	2836		2063	3016	88	0	0	0
2	1274	2836	2046		3016	2063	88	0	0	0
1	1274	2046	2836		2065	3016	89	0	0	0
2	1274	2836	2046		3016	2065	89	0	0	0
1	1276	3089	2050		3999	4385	91	0.3125	0	0
2	1276	2050	3089		4385	3999	91	0.3125	0	0
1	1281	2460	2076		2496	3573	97	0.046875	0	0
2	1281	2076	2460		3573	2496	97	0.046875	0	0
1	1282	2076	2631		2920	3223	98	0.0078125	0	0
2	1282	2631	2076		3223	2920	98	0.0078125	0	0
1	1284	2083	2096		3608	4091	100	0.0390625	0	0
2	1284	2096	2083		4091	3608	100	0.0390625	0	0
1	1285	2083	2098		3605	3610	101	0.03125	0	0
2	1285	2098	2083		3610	3605	101	0.03125	0	0
1	1286	2083	3668		3607	3978	102	0.078125	0	0
2	1286	3668	2083		3978	3607	102	0.078125	0	0
1	1287	2081	2088		2086	2101	103	0	0	0
2	1287	2088	2081		2101	2086	103	0	0	0
1	1288	2088	2208		2094	3099	104	0	0	0
2	1288	2208	2088		3099	2094	104	0	0	0
1	1289	2088	2381		2105	2985	105	0.0625	0	0
2	1289	2381	2088		2985	2105	105	0.0625	0	0
1	1289	2088	2381		2111	2564	106	0.1875	0	0
2	1289	2381	2088		2564	2111	106	0.1875	0	0
1	1289	2088	2381		2480	2744	107	0.1875	0	0
2	1289	2381	2088		2744	2480	107	0.1875	0	0
1	1290	2088	2385		2480	2481	108	0.1875	0	0
2	1290	2385	2088		2481	2480	108	0.1875	0	0
1	1291	2088	2791		2096	2796	109	0	0	0
2	1291	2791	2088		2796	2096	109	0	0	0
1	1292	2088	2836		2104	3012	110	0	0	0
2	1292	2836	2088		3012	2104	110	0	0	0
1	1293	2088	3769		2092	3818	111	0	0	0
2	1293	3769	2088		3818	2092	111	0	0	0
1	1294	2088	4437		2091	2258	112	0	0	0
2	1294	4437	2088		2258	2091	112	0	0	0
1	1295	2088	5041		2094	2635	113	0.1875	0	0
2	1295	5041	2088		2635	2094	113	0.1875	0	0
1	1297	2057	3090		3927	4407	115	0.0390625	0	0
2	1297	3090	2057		4407	3927	115	0.0390625	0	0
1	1299	2836	2091		3017	3510	118	0.03125	0	0
2	1299	2091	2836		3510	3017	118	0.03125	0	0
1	1299	2836	2091		3018	3513	119	0.03125	0	0
2	1299	2091	2836		3513	3018	119	0.03125	0	0
1	1300	2092	2153		3560	3945	120	0.15625	0	0
2	1300	2153	2092		3945	3560	120	0.15625	0	0
1	1301	2836	2092		3015	3485	121	0.03125	0	0
2	1301	2092	2836		3485	3015	121	0.03125	0	0
1	1302	2099	2985		3453	4362	122	0.0976562	0	0
2	1302	2985	2099		4362	3453	122	0.0976562	0	0
1	1303	2135	2279		2098	2989	123	0.0625	0	0
2	1303	2279	2135		2989	2098	123	0.0625	0	0
1	1304	2135	2836		2099	3010	125	0.0625	0	0
2	1304	2836	2135		3010	2099	125	0.0625	0	0
1	1304	2135	2836		2100	3011	126	0.0625	0	0
2	1304	2836	2135		3011	2100	126	0.0625	0	0
1	1307	2844	2148		2024	2029	129	0	0	0
2	1307	2148	2844		2029	2024	129	0	0	0
1	1308	2172	2153		2178	2759	130	0	0	0
2	1308	2153	2172		2759	2178	130	0	0	0
1	1309	3045	2153		2758	2765	131	0.09375	0	0
2	1309	2153	3045		2765	2758	131	0.09375	0	0
1	1310	2153	3368		2757	3372	132	0	0	0
2	1310	3368	2153		3372	2757	132	0	0	0
1	1310	2153	3368		3403	3370	133	0	0	0
2	1310	3368	2153		3370	3403	133	0	0	0
1	1311	2157	2282		2275	2285	134	0.0625	0	0
2	1311	2282	2157		2285	2275	134	0.0625	0	0
1	1312	2157	2295		2271	2297	135	0.09375	0	0
2	1312	2295	2157		2297	2271	135	0.09375	0	0
1	1313	2158	2172		2164	2180	136	0	0	0
2	1313	2172	2158		2180	2164	136	0	0	0
1	1313	2158	2172		2166	2205	137	0	0	0
2	1313	2172	2158		2205	2166	137	0	0	0
1	1313	2158	2172		2167	2205	138	0	0	0
2	1313	2172	2158		2205	2167	138	0	0	0
1	1313	2158	2172		2169	2178	139	0	0	0
2	1313	2172	2158		2178	2169	139	0	0	0
1	1313	2158	2172		2171	2173	140	0	0	0
2	1313	2172	2158		2173	2171	140	0	0	0
1	1314	2158	2194		2165	2196	141	0	0	0
2	1314	2194	2158		2196	2165	141	0	0	0
1	1314	2158	2194		2170	2419	142	0	0	0
2	1314	2194	2158		2419	2170	142	0	0	0
1	1319	2172	2218		3368	2404	143	0.0703125	0	0
2	1319	2218	2172		2404	3368	143	0.0703125	0	0
1	1320	2172	2426		2177	2467	144	0	0	0
2	1320	2426	2172		2467	2177	144	0	0	0
1	1320	2172	2426		2179	2463	145	0	0	0
2	1320	2426	2172		2463	2179	145	0	0	0
1	1321	2172	2543		3154	3755	147	0	0	0
2	1321	2543	2172		3755	3154	147	0	0	0
1	1322	2172	2685		2176	2371	148	0.015625	0	0
2	1322	2685	2172		2371	2176	148	0.015625	0	0
1	1322	2172	2685		2630	2661	149	0	0	0
2	1322	2685	2172		2661	2630	149	0	0	0
1	1323	2194	2283		2777	2778	150	0	0	0
2	1323	2283	2194		2778	2777	150	0	0	0
1	1328	2211	3730		2037	2026	157	0	0	0
2	1328	3730	2211		2026	2037	157	0	0	0
1	1332	2279	2283		2986	2342	158	0.09375	0	0
2	1332	2283	2279		2342	2986	158	0.09375	0	0
1	1332	2279	2283		2987	3158	159	0.09375	0	0
2	1332	2283	2279		3158	2987	159	0.09375	0	0
1	1333	2328	2029		2561	2562	160	0.0078125	0	0
2	1333	2029	2328		2562	2561	160	0.0078125	0	0
1	1334	2328	2381		2327	2318	161	0	0	0
2	1334	2381	2328		2318	2327	161	0	0	0
1	1334	2328	2381		2551	2552	162	0	0	0
2	1334	2381	2328		2552	2551	162	0	0	0
1	1335	2426	2551		2464	2578	163	0.0292969	0	0
2	1335	2551	2426		2578	2464	163	0.0292969	0	0
1	1336	2426	3011		2465	2475	164	0.046875	0	0
2	1336	3011	2426		2475	2465	164	0.046875	0	0
1	1337	2458	2460		2426	2427	165	0.03125	0	0
2	1337	2460	2458		2427	2426	165	0.03125	0	0
1	1338	2460	2791		2495	2799	166	0.25	0	0
2	1338	2791	2460		2799	2495	166	0.25	0	0
1	1338	2460	2791		2497	2800	167	0.25	0	0
2	1338	2791	2460		2800	2497	167	0.25	0	0
1	1339	2505	2385		2506	2482	168	0.0625	0	0
2	1339	2385	2505		2482	2506	168	0.0625	0	0
1	1340	2836	2505		3014	3477	169	0	0	0
2	1340	2505	2836		3477	3014	169	0	0	0
1	1341	2541	2783		2543	2789	170	0	0	0
2	1341	2783	2541		2789	2543	170	0	0	0
1	1345	2926	2543		4044	4047	174	0	0	0
2	1345	2543	2926		4047	4044	174	0	0	0
1	1345	2926	2543		4044	4055	175	0	0	0
2	1345	2543	2926		4055	4044	175	0	0	0
1	1347	2620	2685		2629	2689	177	0	0	0
2	1347	2685	2620		2689	2629	177	0	0	0
1	1348	2620	3793		2624	2956	178	0.125	0	0
2	1348	3793	2620		2956	2624	178	0.125	0	0
1	1349	2620	5041		2428	2429	179	0.015625	0	0
2	1349	5041	2620		2429	2428	179	0.015625	0	0
1	1350	2631	2672		2637	2653	180	0	0	0
2	1350	2672	2631		2653	2637	180	0	0	0
1	1352	2685	2872		2236	2880	183	0	0	0
2	1352	2872	2685		2880	2236	183	0	0	0
1	1354	2699	2872		2700	2712	185	0	0	0
2	1354	2872	2699		2712	2700	185	0	0	0
1	1354	2699	2872		2706	2714	186	0	0	0
2	1354	2872	2699		2714	2706	186	0	0	0
1	1354	2699	2872		2707	2731	187	0	0	0
2	1354	2872	2699		2731	2707	187	0	0	0
1	1354	2872	2699		2880	4108	188	0	0	0
2	1354	2699	2872		4108	2880	188	0	0	0
1	1354	2872	2699		2883	4110	189	0	0	0
2	1354	2699	2872		4110	2883	189	0	0	0
1	1356	2747	5041		2746	2635	190	0.148438	0	0
2	1356	5041	2747		2635	2746	190	0.148438	0	0
1	1357	2783	2791		2194	2195	191	0.09375	0	0
2	1357	2791	2783		2195	2194	191	0.09375	0	0
1	1358	2783	2801		2790	2812	192	0.1875	0	0
2	1358	2801	2783		2812	2790	192	0.1875	0	0
1	1365	2791	2836		2794	3006	198	0	0	0
2	1365	2836	2791		3006	2794	198	0	0	0
1	1367	2801	2836		2813	3007	200	0	0	0
2	1367	2836	2801		3007	2813	200	0	0	0
1	1368	2801	2926		2811	3652	201	0.1875	0	0
2	1368	2926	2801		3652	2811	201	0.1875	0	0
1	1370	3088	3209		3747	4011	206	0.140625	0	0
2	1370	3209	3088		4011	3747	206	0.140625	0	0
1	1370	3088	3209		3751	4013	207	0.140625	0	0
2	1370	3209	3088		4013	3751	207	0.140625	0	0
1	1371	3088	3668		3748	3971	208	0.046875	0	0
2	1371	3668	3088		3971	3748	208	0.046875	0	0
1	1372	3100	2283		2671	3161	209	0.015625	0	0
2	1372	2283	3100		3161	2671	209	0.015625	0	0
1	1372	3100	2283		2673	3164	210	0.015625	0	0
2	1372	2283	3100		3164	2673	210	0.015625	0	0
1	1372	3100	2283		2677	3162	211	0.015625	0	0
2	1372	2283	3100		3162	2677	211	0.015625	0	0
1	1372	3100	2283		2678	3156	212	0	0	0
2	1372	2283	3100		3156	2678	212	0	0	0
1	1372	3100	2283		2679	3155	213	0	0	0
2	1372	2283	3100		3155	2679	213	0	0	0
1	1373	3100	2661		2669	2663	214	0.0625	0	0
2	1373	2661	3100		2663	2669	214	0.0625	0	0
1	1374	3100	2927		3054	3049	215	0.03125	0	0
2	1374	2927	3100		3049	3054	215	0.03125	0	0
1	1374	3100	2927		3054	3050	216	0.03125	0	0
2	1374	2927	3100		3050	3054	216	0.03125	0	0

## Sheet: Raid Groups
The unique ID given to every raid event	The unique ID given to any pair of raiders who raided together	The Unique ID number given to one male of the pair of raiders	The Unique ID number given to the other male of the pair of raiders	The genetic relatedness between the pair of raiders in Column C and D	The territorial group from which Ego 1 originated	The territorial group from which Ego 2 originated	A binary dummy variable that asks the question: Are Ego 1 and Ego 2 from the same territorial group (0=No; 1=Yes)	The absolute difference in age between ego 1 and ego 2	The patrilineage to which ego 1 belonged	The patrilineage to which Ego 2 belonged	A binary dumy variable that asks the question: Is this dyad from the same patrilineage (0=No; 1=Yes)	The matrilineage to which ego 1 belonged	The matrilineage to which Ego 2 belonged	A binary dumy variable that asks the question: Is this dyad from the same matrilineage (0=No; 1=Yes)	The year in which the raid event occurred
Raid ID	Dyad ID	Ego1	Ego2	r	Ego Group 1	Ego Group2	Same Group (0=No; 1=Yes)	Absolute Age Difference: Ego1 & Ego2	Ego1 Plin	Ego2 Plin	Same Plin (0=No; 1=Yes)	Mlin1	Mlin2	Same Mlin (0=No; 1=Yes)	Raid Year
30	55	2159	3696	0	B	W	0	12	2312	3953	0	2313	4176	0	1916
30	64	2458	3696	0.5	W	W	1	3	3953	3953	1	4176	4176	1	1916
30	184	2737	3696	0	P	W	0	1	3563	3953	0	4143	4176	0	1916
30	203	2784	3696	0	G	W	0	8	3566	3953	0	3565	4176	0	1916
30	474	2159	2784	0	B	G	0	4	2312	3566	0	2313	3565	0	1916
30	530	2159	2737	0	B	P	0	13	2312	3563	0	2313	4143	0	1916
30	725	2458	2784	0	W	G	0	5	3953	3566	0	4176	3565	0	1916
30	744	2159	2458	0	B	W	0	9	2312	3953	0	2313	4176	0	1916
30	774	2458	2737	0	W	P	0	4	3953	3563	0	4176	4143	0	1916
30	1051	2737	2784	0	P	G	0	9	3563	3566	0	4143	3565	0	1916
9	381	2070	2787	0	W	W	1	12	3953	4478	0	3954	4479	0	1920
9	423	2070	2737	0	W	P	0	5	3953	3563	0	3954	4143	0	1920
9	469	2159	2787	0	B	W	0	4	2312	4478	0	2313	4479	0	1920
9	530	2159	2737	0	B	P	0	13	2312	3563	0	2313	4143	0	1920
9	607	2070	2541	0	W	W	1	0	3953	4161	0	3954	4176	0	1920
9	673	2070	2458	0.25	W	W	1	1	3953	3953	1	3954	4176	0	1920
9	678	2159	2541	0	B	W	0	8	2312	4161	0	2313	4176	0	1920
9	723	2458	2787	0	W	W	1	13	3953	4478	0	4176	4479	0	1920
9	744	2159	2458	0	B	W	0	9	2312	3953	0	2313	4176	0	1920
9	774	2458	2737	0	W	P	0	4	3953	3563	0	4176	4143	0	1920
9	813	2541	2787	0	W	W	1	12	4161	4478	0	4176	4479	0	1920
9	845	2541	2737	0	W	P	0	5	4161	3563	0	4176	4143	0	1920
9	993	2070	2159	0	W	B	0	8	3953	2312	0	3954	2313	0	1920
9	998	2458	2541	0.1875	W	W	1	1	3953	4161	0	4176	4176	1	1920
9	1044	2737	2787	0	P	W	0	17	3563	4478	0	4143	4479	0	1920
61	738	2541	2844	0	W	G	0	11	4161	2857	0	4176	5143	0	1921
61	816	2541	2784	0	W	G	0	4	4161	3566	0	4176	3565	0	1921
61	1028	2784	2844	0	G	G	1	15	3566	2857	0	3565	5143	0	1921
41	1116	2822	2844	0	G	G	1	4	3814	2857	0	5156	5143	0	1931
75	52	2211	3769	0	G	G	1	6	4271	5142	0	3727	3766	0	1931
75	53	2211	3768	0	G	G	1	3	4271	5142	0	3727	3766	0	1931
75	198	2844	3769	0.125	G	G	1	5	2857	5142	0	5143	3766	0	1931
75	199	2844	3768	0.125	G	G	1	2	2857	5142	0	5143	3766	0	1931
75	209	2872	3769	0.125	G	G	1	0	2857	5142	0	5143	3766	0	1931
75	211	2872	3768	0.125	G	G	1	3	2857	5142	0	5143	3766	0	1931
75	430	2211	2872	0	G	G	1	6	4271	2857	0	3727	5143	0	1931
75	466	2211	2844	0	G	G	1	1	4271	2857	0	3727	5143	0	1931
75	1100	2844	2872	0.5	G	G	1	5	2857	2857	1	5143	5143	1	1931
75	1196	3768	3769	0.375	G	G	1	3	5142	5142	1	3766	3766	1	1931
3	32	2046	3696	0	W	W	1	23	3586	3953	0	3178	4176	0	1937
3	37	2070	3696	0.25	W	W	1	4	3953	3953	1	3954	4176	0	1937
3	39	2076	3696	0.125	W	W	1	32	3953	3953	1	3956	4176	0	1937
3	43	2081	3696	0.5	W	W	1	16	3953	3953	1	4176	4176	1	1937
3	58	2328	3696	0.09375	W	W	1	14	4161	3953	0	3178	4176	0	1937
3	62	2426	3696	0.25	W	W	1	38	3953	3953	1	3178	4176	0	1937
3	86	2543	3696	0.09375	W	W	1	17	4161	3953	0	3178	4176	0	1937
3	131	2046	3085	0	W	W	1	14	3586	4394	0	3178	4395	0	1937
3	143	2070	3085	0	W	W	1	13	3953	4394	0	3954	4395	0	1937
3	147	2076	3085	0	W	W	1	23	3953	4394	0	3956	4395	0	1937
3	156	2081	3085	0	W	W	1	7	3953	4394	0	4176	4395	0	1937
3	204	2791	3696	0.125	W	W	1	32	3953	3953	1	3956	4176	0	1937
3	234	2046	2918	0	W	W	1	18	3586	4478	0	3178	2818	0	1937
3	253	2070	2918	0	W	W	1	45	3953	4478	0	3954	2818	0	1937
3	259	2076	2918	0	W	W	1	9	3953	4478	0	3956	2818	0	1937
3	269	2081	2918	0	W	W	1	25	3953	4478	0	4176	2818	0	1937
3	309	2918	3696	0	W	W	1	41	4478	3953	0	2818	4176	0	1937
3	336	2328	3085	0	W	W	1	5	4161	4394	0	3178	4395	0	1937
3	346	2046	2791	0	W	W	1	9	3586	3953	0	3178	3956	0	1937
3	377	2070	2791	0.5	W	W	1	36	3953	3953	1	3954	3956	0	1937
3	383	2076	2791	0.5	W	W	1	0	3953	3953	1	3956	3956	1	1937
3	386	2081	2791	0.125	W	W	1	16	3953	3953	1	4176	3956	0	1937
3	436	2426	3085	0	W	W	1	29	3953	4394	0	3178	4395	0	1937
3	492	3085	3696	0	W	W	1	9	4394	3953	0	4395	4176	0	1937
3	514	2328	2918	0	W	W	1	27	4161	4478	0	3178	2818	0	1937
3	547	2543	3085	0	W	W	1	8	4161	4394	0	3178	4395	0	1937
3	580	2046	2543	0.125	W	W	1	6	3586	4161	0	3178	3178	1	1937
3	584	2426	2918	0	W	W	1	3	3953	4478	0	3178	2818	0	1937
3	602	2070	2543	0	W	W	1	21	3953	4161	0	3954	3178	0	1937
3	612	2076	2543	0	W	W	1	15	3953	4161	0	3956	3178	0	1937
3	615	2328	2791	0	W	W	1	18	4161	3953	0	3178	3956	0	1937
3	617	2081	2543	0.09375	W	W	1	1	3953	4161	0	4176	3178	0	1937
3	680	2046	2426	0.25	W	W	1	15	3586	3953	0	3178	3178	1	1937
3	686	2543	2918	0	W	W	1	24	4161	4478	0	3178	2818	0	1937
3	692	2426	2791	0.0625	W	W	1	6	3953	3953	1	3178	3956	0	1937
3	699	2070	2426	0.125	W	W	1	42	3953	3953	1	3954	3178	0	1937
3	703	2076	2426	0.0625	W	W	1	6	3953	3953	1	3956	3178	0	1937
3	712	2081	2426	0.25	W	W	1	22	3953	3953	1	4176	3178	0	1937
3	747	2791	3085	0	W	W	1	23	3953	4394	0	3956	4395	0	1937
3	767	2046	2328	0.125	W	W	1	9	3586	4161	0	3178	3178	1	1937
3	801	2070	2328	0	W	W	1	18	3953	4161	0	3954	3178	0	1937
3	806	2076	2328	0	W	W	1	18	3953	4161	0	3956	3178	0	1937
3	811	2543	2791	0	W	W	1	15	4161	3953	0	3178	3956	0	1937
3	812	2081	2328	0.09375	W	W	1	2	3953	4161	0	4176	3178	0	1937
3	841	2328	2543	0.5	W	W	1	3	4161	4161	1	3178	3178	1	1937
3	882	2918	3085	0	W	W	1	32	4478	4394	0	2818	4395	0	1937
3	924	2791	2918	0	W	W	1	9	3953	4478	0	3956	2818	0	1937
3	945	2426	2543	0.109375	W	W	1	21	3953	4161	0	3178	3178	1	1937
3	989	2328	2426	0.109375	W	W	1	24	4161	3953	0	3178	3178	1	1937
3	1081	2046	2081	0	W	W	1	7	3586	3953	0	3178	4176	0	1937
3	1094	2046	2076	0	W	W	1	9	3586	3953	0	3178	3956	0	1937
3	1107	2046	2070	0	W	W	1	27	3586	3953	0	3178	3954	0	1937
3	1136	2070	2081	0.25	W	W	1	20	3953	3953	1	3954	4176	0	1937
3	1158	2070	2076	0.5	W	W	1	36	3953	3953	1	3954	3956	0	1937
3	1164	2076	2081	0.125	W	W	1	16	3953	3953	1	3956	4176	0	1937
31	46	2088	3696	0	P	W	0	12	2312	3953	0	2123	4176	0	1937
31	51	2125	3696	0	P	W	0	8	2312	3953	0	2123	4176	0	1937
31	54	2146	3696	0	P	W	0	8	2145	3953	0	2144	4176	0	1937
31	64	2458	3696	0.5	W	W	1	3	3953	3953	1	4176	4176	1	1937
31	86	2543	3696	0.09375	W	W	1	17	4161	3953	0	3178	4176	0	1937
31	146	2685	3696	0.03125	P	W	0	24	3563	3953	0	3954	4176	0	1937
31	167	2088	3085	0	P	W	0	3	2312	4394	0	2123	4395	0	1937
31	182	2125	3085	0	P	W	0	1	2312	4394	0	2123	4395	0	1937
31	184	2737	3696	0	P	W	0	1	3563	3953	0	4143	4176	0	1937
31	193	2146	3085	0	P	W	0	1	2145	4394	0	2144	4395	0	1937
31	203	2784	3696	0	G	W	0	8	3566	3953	0	3565	4176	0	1937
31	403	2088	2784	0	P	G	0	20	2312	3566	0	2123	3565	0	1937
31	435	2125	2784	0	P	G	0	16	2312	3566	0	2123	3565	0	1937
31	452	2088	2737	0	P	P	1	11	2312	3563	0	2123	4143	0	1937
31	462	2146	2784	0	P	G	0	16	2145	3566	0	2144	3565	0	1937
31	472	2458	3085	0	W	W	1	12	3953	4394	0	4176	4395	0	1937
31	485	2125	2737	0	P	P	1	7	2312	3563	0	2123	4143	0	1937
31	492	3085	3696	0	W	W	1	9	4394	3953	0	4395	4176	0	1937
31	503	2088	2685	0.0625	P	P	1	12	2312	3563	0	2123	3954	0	1937
31	510	2146	2737	0	P	P	1	7	2145	3563	0	2144	4143	0	1937
31	536	2125	2685	0.0625	P	P	1	16	2312	3563	0	2123	3954	0	1937
31	547	2543	3085	0	W	W	1	8	4161	4394	0	3178	4395	0	1937
31	553	2146	2685	0	P	P	1	16	2145	3563	0	2144	3954	0	1937
31	629	2088	2543	0	P	W	0	5	2312	4161	0	2123	3178	0	1937
31	643	2125	2543	0	P	W	0	9	2312	4161	0	2123	3178	0	1937
31	661	2685	3085	0	P	W	0	15	3563	4394	0	3954	4395	0	1937
31	664	2146	2543	0	P	W	0	9	2145	4161	0	2144	3178	0	1937
31	689	2088	2458	0	P	W	0	15	2312	3953	0	2123	4176	0	1937
31	706	2737	3085	0	P	W	0	8	3563	4394	0	4143	4395	0	1937
31	722	2125	2458	0	P	W	0	11	2312	3953	0	2123	4176	0	1937
31	725	2458	2784	0	W	G	0	5	3953	3566	0	4176	3565	0	1937
31	730	2146	2458	0	P	W	0	11	2145	3953	0	2144	4176	0	1937
31	743	2784	3085	0	G	W	0	17	3566	4394	0	3565	4395	0	1937
31	774	2458	2737	0	W	P	0	4	3953	3563	0	4176	4143	0	1937
31	817	2543	2784	0	W	G	0	25	4161	3566	0	3178	3565	0	1937
31	834	2458	2685	0.03125	W	P	0	27	3953	3563	0	4176	3954	0	1937
31	846	2543	2737	0	W	P	0	16	4161	3563	0	3178	4143	0	1937
31	906	2543	2685	0	W	P	0	7	4161	3563	0	3178	3954	0	1937
31	988	2685	2784	0	P	G	0	32	3563	3566	0	3954	3565	0	1937
31	995	2458	2543	0.09375	W	W	1	20	3953	4161	0	4176	3178	0	1937
31	1033	2088	2146	0	P	P	1	4	2312	2145	0	2123	2144	0	1937
31	1041	2685	2737	0.5	P	P	1	23	3563	3563	1	3954	4143	0	1937
31	1051	2737	2784	0	P	G	0	9	3563	3566	0	4143	3565	0	1937
31	1075	2088	2125	0.5	P	P	1	4	2312	2312	1	2123	2123	1	1937
31	1118	2125	2146	0	P	P	1	0	2312	2145	0	2123	2144	0	1937
73	1196	3768	3769	0.375	G	G	1	3	5142	5142	1	3766	3766	1	1939
28	47	2211	3813	0	G	P	0	8	4271	3814	0	3727	5156	0	1942
28	52	2211	3769	0	G	G	1	6	4271	5142	0	3727	3766	0	1942
28	53	2211	3768	0	G	G	1	3	4271	5142	0	3727	3766	0	1942
28	176	2844	3813	0	G	P	0	7	2857	3814	0	5143	5156	0	1942
28	198	2844	3769	0.125	G	G	1	5	2857	5142	0	5143	3766	0	1942
28	199	2844	3768	0.125	G	G	1	2	2857	5142	0	5143	3766	0	1942
28	466	2211	2844	0	G	G	1	1	4271	2857	0	3727	5143	0	1942
28	1056	3768	3813	0	G	P	0	5	5142	3814	0	3766	5156	0	1942
28	1060	3769	3813	0	G	P	0	2	5142	3814	0	3766	5156	0	1942
28	1196	3768	3769	0.375	G	G	1	3	5142	5142	1	3766	3766	1	1942
2	352	2088	2822	0	P	G	0	1	2312	3814	0	2123	5156	0	1945
2	401	2125	2822	0	P	G	0	3	2312	3814	0	2123	5156	0	1945
2	403	2088	2784	0	P	G	0	20	2312	3566	0	2123	3565	0	1945
2	410	2135	2822	0	P	G	0	4	2312	3814	0	3178	5156	0	1945
2	415	2148	2822	0	G	G	1	12	2145	3814	0	3178	5156	0	1945
2	418	2153	2822	0	P	G	0	21	2145	3814	0	3178	5156	0	1945
2	428	2159	2822	0	B	G	0	23	2312	3814	0	2313	5156	0	1945
2	434	2088	2747	0.5	P	P	1	12	2312	2312	1	2123	3564	0	1945
2	435	2125	2784	0	P	G	0	16	2312	3566	0	2123	3565	0	1945
2	440	2088	2743	0.0625	P	P	1	18	2312	3563	0	2123	3954	0	1945
2	452	2088	2737	0	P	P	1	11	2312	3565	0	2123	4143	0	1945
2	454	2135	2784	0	P	G	0	15	2312	3566	0	3178	3565	0	1945
2	465	2148	2784	0	G	G	1	31	2145	3566	0	3178	3565	0	1945
2	467	2153	2784	0	P	G	0	40	2145	3566	0	3178	3565	0	1945
2	474	2159	2784	0	B	G	0	4	2312	3566	0	2313	3565	0	1945
2	477	2125	2747	0.25	P	P	1	16	2312	2312	1	2123	3564	0	1945
2	480	2125	2743	0.0625	P	P	1	22	2312	3563	0	2123	3954	0	1945
2	485	2125	2737	0	P	P	1	7	2312	3563	0	2123	4143	0	1945
2	486	2135	2747	0.0625	P	P	1	17	2312	2312	1	3178	3564	0	1945
2	489	2088	2699	0.0625	P	P	1	21	2312	3565	0	2123	3954	0	1945
2	494	2135	2743	0.125	P	P	1	23	2312	3563	0	3178	3954	0	1945
2	497	2135	2737	0	P	P	1	6	2312	3563	0	3178	4143	0	1945
2	500	2148	2747	0	G	P	0	1	2145	2312	0	3178	3564	0	1945
2	503	2088	2685	0.0625	P	P	1	12	2312	3565	0	2123	3954	0	1945
2	505	2148	2743	0	G	P	0	7	2145	3563	0	3178	3954	0	1945
2	507	2153	2747	0	P	P	1	8	2145	2312	0	3178	3564	0	1945
2	512	2153	2743	0	P	P	1	2	2145	3563	0	3178	3954	0	1945
2	515	2148	2737	0	G	P	0	22	2145	3563	0	3178	4143	0	1945
2	520	2159	2747	0.125	B	P	0	36	2312	2312	1	2313	3564	0	1945
2	525	2153	2737	0	P	P	1	31	2145	3563	0	3178	4143	0	1945
2	526	2159	2743	0.25	B	P	0	42	2312	3563	0	2313	3954	0	1945
2	530	2159	2737	0	B	P	0	13	2312	3563	0	2313	4143	0	1945
2	531	2125	2699	0.0625	P	P	1	25	2312	3563	0	2123	3954	0	1945
2	535	2135	2699	0.125	P	P	1	26	2312	3563	0	3178	3954	0	1945
2	536	2125	2685	0.0625	P	P	1	16	2312	3563	0	2123	3954	0	1945
2	538	2148	2699	0	G	P	0	10	2145	3563	0	3178	3954	0	1945
2	539	2135	2685	0.125	P	P	1	17	2312	3563	0	3178	3954	0	1945
2	541	2153	2699	0	P	P	1	1	2145	3563	0	3178	3954	0	1945
2	543	2088	2631	0.0625	P	P	1	7	2312	3563	0	2123	3954	0	1945
2	551	2159	2699	0.25	B	P	0	45	2312	3563	0	2313	3954	0	1945
2	554	2148	2685	0	G	P	0	1	2145	3563	0	3178	3954	0	1945
2	558	2153	2685	0	P	P	1	8	2145	3563	0	3178	3954	0	1945
2	568	2159	2685	0.25	B	P	0	36	2312	3563	0	2313	3954	0	1945
2	574	2125	2631	0.0625	P	P	1	11	2312	3563	0	2123	3954	0	1945
2	581	2135	2631	0.125	P	P	1	12	2312	3563	0	3178	3954	0	1945
2	592	2148	2631	0	G	P	0	4	2145	3563	0	3178	3954	0	1945
2	598	2153	2631	0	P	P	1	13	2145	3563	0	3178	3954	0	1945
2	606	2159	2631	0.25	B	P	0	31	2312	3563	0	2313	3954	0	1945
2	849	2631	2822	0	P	G	0	8	3563	3814	0	3954	5156	0	1945
2	897	2631	2784	0	P	G	0	27	3563	3566	0	3954	3565	0	1945
2	909	2685	2822	0	P	G	0	13	3563	3814	0	3954	5156	0	1945
2	932	2699	2822	0	P	G	0	22	3563	3814	0	3954	5156	0	1945
2	947	2631	2747	0.296875	P	P	1	27	3563	2312	0	3954	3564	0	1945
2	956	2631	2743	0.5	P	P	1	11	3563	3563	1	3954	3954	1	1945
2	981	2631	2737	0.5	P	P	1	18	3563	3563	1	3954	4143	0	1945
2	988	2685	2784	0	P	G	0	32	3563	3566	0	3954	3565	0	1945
2	996	2699	2784	0	P	G	0	41	3563	3566	0	3954	3565	0	1945
2	997	2737	2822	0	P	G	0	10	3563	3814	0	4143	5156	0	1945
2	1000	2743	2822	0	P	G	0	19	3563	3814	0	3954	5156	0	1945
2	1002	2747	2822	0	P	G	0	13	2312	3814	0	3564	5156	0	1945
2	1008	2088	2159	0.25	P	B	0	24	2312	2312	1	2123	2313	0	1945
2	1014	2631	2699	0.5	P	P	1	14	3563	3563	1	3954	3954	1	1945
2	1016	2088	2153	0	P	P	1	20	2312	2145	0	2123	3178	0	1945
2	1021	2685	2747	0.09375	P	P	1	0	3563	2312	0	3954	3564	0	1945
2	1026	2088	2148	0	P	G	0	11	2312	2145	0	2123	3178	0	1945
2	1034	2685	2743	0.5	P	P	1	6	3563	3563	1	3954	3954	1	1945
2	1038	2631	2685	0.5	P	P	1	5	3563	3563	1	3954	3954	1	1945
2	1041	2685	2737	0.5	P	P	1	23	3563	3563	1	3954	4143	0	1945
2	1048	2699	2747	0.09375	P	P	1	9	3563	2312	0	3954	3564	0	1945
2	1049	2088	2135	0.125	P	P	1	5	2312	2312	1	2123	3178	0	1945
2	1051	2737	2784	0	P	G	0	9	3563	3566	0	4143	3565	0	1945
2	1058	2699	2743	0.5	P	P	1	3	3563	3563	1	3954	3954	1	1945
2	1066	2743	2784	0	P	G	0	38	3563	3566	0	3954	3565	0	1945
2	1070	2699	2737	0.5	P	P	1	32	3563	3563	1	3954	4143	0	1945
2	1071	2784	2822	0	G	G	1	19	3566	3814	0	3565	5156	0	1945
2	1075	2088	2125	0.5	P	P	1	4	2312	2312	1	2123	2123	1	1945
2	1078	2747	2784	0	P	G	0	32	2312	3566	0	3564	3565	0	1945
2	1084	2125	2159	0.25	P	B	0	20	2312	2312	1	2123	2313	0	1945
2	1098	2125	2153	0	P	P	1	24	2312	2145	0	2123	3178	0	1945
2	1110	2135	2159	0.5	P	B	0	19	2312	2312	1	3178	2313	0	1945
2	1112	2125	2148	0	P	G	0	15	2312	2145	0	2123	3178	0	1945
2	1124	2135	2153	0.125	P	P	1	25	2312	2145	0	3178	3178	1	1945
2	1129	2685	2699	0.5	P	P	1	9	3563	3563	1	3954	3954	1	1945
2	1131	2135	2148	0.125	P	G	0	16	2312	2145	0	3178	3178	1	1945
2	1138	2148	2159	0	G	B	0	35	2145	2312	0	3178	2313	0	1945
2	1141	2125	2135	0.125	P	P	1	1	2312	2312	1	2123	3178	0	1945
2	1144	2737	2747	0.125	P	P	1	23	3563	2312	0	4143	3564	0	1945
2	1161	2153	2159	0	P	B	0	44	2145	2312	0	3178	2313	0	1945
2	1162	2737	2743	0.5	P	P	1	29	3563	3563	1	4143	3954	0	1945
2	1165	2148	2153	0.5	G	P	0	9	2145	2145	1	3178	3178	1	1945
2	1171	2743	2747	0.09375	P	P	1	6	3563	2312	0	3954	3564	0	1945
22	37	2070	3696	0.25	W	W	1	4	3953	3953	1	3954	4176	0	1945
22	46	2088	3696	0	P	W	0	12	2312	3953	0	2123	4176	0	1945
22	51	2125	3696	0	P	W	0	8	2312	3953	0	2123	4176	0	1945
22	54	2146	3696	0	P	W	0	8	2145	3953	0	2144	4176	0	1945
22	55	2159	3696	0	B	W	0	12	2312	3953	0	2313	4176	0	1945
22	143	2070	3085	0	W	W	1	13	3953	4394	0	3954	4395	0	1945
22	167	2088	3085	0	P	W	0	3	2312	4394	0	2123	4395	0	1945
22	182	2125	3085	0	P	W	0	1	2312	4394	0	2123	4395	0	1945
22	184	2737	3696	0	P	W	0	1	3563	3953	0	4143	4176	0	1945
22	188	2747	3696	0	P	W	0	24	2312	3953	0	3564	4176	0	1945
22	193	2146	3085	0	P	W	0	1	2145	4394	0	2144	4395	0	1945
22	197	2159	3085	0	B	W	0	21	2312	4394	0	2313	4395	0	1945
22	203	2784	3696	0	G	W	0	8	3566	3953	0	3565	4176	0	1945
22	254	2070	2917	0	W	W	1	34	3953	4478	0	3954	2818	0	1945
22	284	2088	2917	0	P	W	0	18	2312	4478	0	2123	2818	0	1945
22	299	2125	2917	0	P	W	0	22	2312	4478	0	2123	2818	0	1945
22	308	2917	3696	0	W	W	1	30	4478	3953	0	2818	4176	0	1945
22	314	2146	2917	0	P	W	0	22	2145	4478	0	2144	2818	0	1945
22	333	2159	2917	0	B	W	0	42	2312	4478	0	2313	2818	0	1945
22	384	2070	2784	0	W	G	0	4	3953	3566	0	3954	3565	0	1945
22	403	2088	2784	0	P	G	0	20	2312	3566	0	2123	3565	0	1945
22	413	2070	2747	0	W	P	0	28	3953	2312	0	3954	3564	0	1945
22	423	2070	2737	0	W	P	0	5	3953	3563	0	3954	4143	0	1945
22	434	2088	2747	0.5	P	P	1	12	2312	2312	1	2123	3564	0	1945
22	435	2125	2784	0	P	G	0	16	2312	3566	0	2123	3565	0	1945
22	452	2088	2737	0	P	P	1	11	2312	3563	0	2123	4143	0	1945
22	462	2146	2784	0	P	G	0	16	2145	3566	0	2144	3565	0	1945
22	474	2159	2784	0	B	G	0	4	2312	3566	0	2313	3565	0	1945
22	477	2125	2747	0.25	P	P	1	16	2312	2312	1	2123	3564	0	1945
22	485	2125	2737	0	P	P	1	7	2312	3563	0	2123	4143	0	1945
22	492	3085	3696	0	W	W	1	9	4394	3953	0	4395	4176	0	1945
22	499	2146	2747	0	P	P	1	16	2145	2312	0	2144	3564	0	1945
22	510	2146	2737	0	P	P	1	7	2145	3563	0	2144	4143	0	1945
22	520	2159	2747	0.125	B	P	0	36	2312	2312	1	2313	3564	0	1945
22	530	2159	2737	0	B	P	0	13	2312	3563	0	2313	4143	0	1945
22	706	2737	3085	0	P	W	0	8	3563	4394	0	4143	4395	0	1945
22	721	2747	3085	0	P	W	0	15	2312	4394	0	3564	4395	0	1945
22	743	2784	3085	0	G	W	0	17	3566	4394	0	3565	4395	0	1945
22	857	2737	2917	0	P	W	0	29	3563	4478	0	4143	2818	0	1945
22	873	2747	2917	0	P	W	0	6	2312	4478	0	3564	2818	0	1945
22	880	2917	3085	0	W	W	1	21	4478	4394	0	2818	4395	0	1945
22	915	2784	2917	0	G	W	0	38	3566	4478	0	3565	2818	0	1945
22	993	2070	2159	0	W	B	0	8	3953	2312	0	3954	2313	0	1945
22	1001	2070	2146	0	W	P	0	12	3953	2145	0	3954	2144	0	1945
22	1008	2088	2159	0.25	P	B	0	24	2312	2312	1	2123	2313	0	1945
22	1033	2088	2146	0	P	P	1	4	2312	2145	0	2123	2144	0	1945
22	1037	2070	2125	0	W	P	0	12	3953	2312	0	3954	2123	0	1945
22	1051	2737	2784	0	P	G	0	9	3563	3566	0	4143	3565	0	1945
22	1075	2088	2125	0.5	P	P	1	4	2312	2312	1	2123	2123	1	1945
22	1078	2747	2784	0	P	G	0	32	2312	3566	0	3564	3565	0	1945
22	1084	2125	2159	0.25	P	B	0	20	2312	2312	1	2123	2313	0	1945
22	1118	2125	2146	0	P	P	1	0	2312	2145	0	2123	2144	0	1945
22	1122	2070	2088	0	W	P	0	16	3953	2312	0	3954	2123	0	1945
22	1132	2146	2159	0	P	B	0	20	2145	2312	0	2144	2313	0	1945
22	1144	2737	2747	0.125	P	P	1	23	3563	2312	0	4143	3564	0	1945
23	47	2211	3813	0	G	P	0	8	4271	3814	0	3727	5156	0	1945
23	52	2211	3769	0	G	G	1	6	4271	5142	0	3727	3766	0	1945
23	53	2211	3768	0	G	G	1	3	4271	5142	0	3727	3766	0	1945
23	71	2620	3813	0	G	P	0	1	3566	3814	0	5143	5156	0	1945
23	89	2620	3769	0.125	G	G	1	3	3566	5142	0	5143	3766	0	1945
23	90	2620	3768	0.125	G	G	1	6	3566	5142	0	5143	3766	0	1945
23	117	2743	3813	0	P	P	1	16	3563	3814	0	3954	5156	0	1945
23	139	2743	3769	0	P	G	0	18	3563	5142	0	3954	3766	0	1945
23	140	2743	3768	0	P	G	0	21	3563	5142	0	3954	3766	0	1945
23	169	2822	3813	0.5	G	P	0	3	3814	3814	1	5156	5156	1	1945
23	176	2844	3813	0	G	P	0	7	2857	3814	0	5143	5156	0	1945
23	190	2822	3769	0	G	G	1	1	3814	5142	0	5156	3766	0	1945
23	191	2822	3768	0	G	G	1	2	3814	5142	0	5156	3766	0	1945
23	192	2872	3813	0	G	P	0	2	2857	3814	0	5143	5156	0	1945
23	198	2844	3769	0.125	G	G	1	5	2857	5142	0	5143	3766	0	1945
23	199	2844	3768	0.125	G	G	1	2	2857	5142	0	5143	3766	0	1945
23	209	2872	3769	0.125	G	G	1	0	2857	5142	0	5143	3766	0	1945
23	210	2916	3813	0	W	P	0	12	4478	3814	0	2818	5156	0	1945
23	211	2872	3768	0.125	G	G	1	3	2857	5142	0	5143	3766	0	1945
23	249	2916	3769	0	W	G	0	14	4478	5142	0	2818	3766	0	1945
23	250	2916	3768	0	W	G	0	17	4478	5142	0	2818	3766	0	1945
23	391	2211	2916	0	G	W	0	20	4271	4478	0	3727	2818	0	1945
23	430	2211	2872	0	G	G	1	6	4271	2857	0	3727	5143	0	1945
23	466	2211	2844	0	G	G	1	1	4271	2857	0	3727	5143	0	1945
23	491	2211	2822	0	G	G	1	5	4271	3814	0	3727	5156	0	1945
23	559	2211	2743	0	G	P	0	24	4271	3563	0	3727	3954	0	1945
23	650	2211	2620	0	G	G	1	9	4271	3566	0	3727	5143	0	1945
23	745	2620	2916	0	G	W	0	11	3566	4478	0	5143	2818	0	1945
23	807	2620	2872	0.125	G	G	1	3	3566	2857	0	5143	5143	1	1945
23	837	2620	2844	0.125	G	G	1	8	3566	2857	0	5143	5143	1	1945
23	844	2620	2822	0	G	G	1	4	3566	3814	0	5143	5156	0	1945
23	865	2743	2916	0	P	W	0	4	3563	4478	0	3954	2818	0	1945
23	919	2743	2872	0	P	G	0	18	3563	2857	0	3954	5143	0	1945
23	931	2620	2743	0	G	P	0	15	3566	3563	0	5143	3954	0	1945
23	987	2743	2844	0	P	G	0	23	3563	2857	0	3954	5143	0	1945
23	992	2822	2916	0	G	W	0	15	3814	4478	0	5156	2818	0	1945
23	1000	2743	2822	0	P	G	0	19	3563	3814	0	3954	5156	0	1945
23	1007	2844	2916	0	G	W	0	19	2857	4478	0	5143	2818	0	1945
23	1045	2822	2872	0	G	G	1	1	3814	2857	0	5156	5143	0	1945
23	1056	3768	3813	0	G	P	0	5	5142	3814	0	3766	5156	0	1945
23	1059	2872	2916	0	G	W	0	14	2857	4478	0	5143	2818	0	1945
23	1060	3769	3813	0	G	P	0	2	5142	3814	0	3766	5156	0	1945
23	1100	2844	2872	0.5	G	G	1	5	2857	2857	1	5143	5143	1	1945
23	1116	2822	2844	0	G	G	1	4	3814	2857	0	5156	5143	0	1945
23	1196	3768	3769	0.375	G	G	1	3	5142	5142	1	3766	3766	1	1945
29	420	3768	4437	0	G	P	0	1	5142	3460	0	3766	3178	0	1945
29	422	3769	4437	0	G	P	0	2	5142	3460	0	3766	3178	0	1945
29	1196	3768	3769	0.375	G	G	1	3	5142	5142	1	3766	3766	1	1945
66	420	3768	4437	0	G	P	0	1	5142	3460	0	3766	3178	0	1945
66	422	3769	4437	0	G	P	0	2	5142	3460	0	3766	3178	0	1945
66	1196	3768	3769	0.375	G	G	1	3	5142	5142	1	3766	3766	1	1945
100	169	2822	3813	0.5	G	P	0	3	3814	3814	1	5156	5156	1	1945
100	176	2844	3813	0	G	P	0	7	2857	3814	0	5143	5156	0	1945
100	190	2822	3769	0	G	G	1	1	3814	5142	0	5156	3766	0	1945
100	191	2822	3768	0	G	G	1	2	3814	5142	0	5156	3766	0	1945
100	198	2844	3769	0.125	G	G	1	5	2857	5142	0	5143	3766	0	1945
100	199	2844	3768	0.125	G	G	1	2	2857	5142	0	5143	3766	0	1945
100	1056	3768	3813	0	G	P	0	5	5142	3814	0	3766	5156	0	1945
100	1060	3769	3813	0	G	P	0	2	5142	3814	0	3766	5156	0	1945
100	1116	2822	2844	0	G	G	1	4	3814	2857	0	5156	5143	0	1945
100	1196	3768	3769	0.375	G	G	1	3	5142	5142	1	3766	3766	1	1945
100	1197	2822	2836	0	G	G	1	15	3814	3712	0	5156	3711	0	1945
100	1198	2836	3769	0	G	G	1	12	3712	5142	0	3711	3766	0	1945
100	1199	2836	3813	0	G	P	0	12	3712	3814	0	3711	5156	0	1945
100	1200	2836	3768	0	G	G	1	14	3712	5142	0	3711	3766	0	1945
100	1201	2836	2844	0	G	G	1	19	3712	2857	0	3711	5143	0	1945
27	29	2125	3793	0	P	P	1	14	2312	2006	0	2123	4280	0	1947
27	34	2149	3793	0	P	P	1	4	2145	2006	0	3178	4280	0	1947
27	1109	2125	2149	0	P	P	1	18	2312	2145	0	2123	3178	0	1947
63	48	2172	3768	0.0625	G	G	1	23	4271	5142	0	5143	3766	0	1947
63	196	2172	3100	0	G	G	1	3	4271	3463	0	5143	3178	0	1947
63	199	2844	3768	0.125	G	G	1	2	2857	5142	0	5143	3766	0	1947
63	207	2866	3768	0	G	G	1	22	3712	5142	0	3711	3766	0	1947
63	211	2872	3768	0.125	G	G	1	3	2857	5142	0	5143	3766	0	1947
63	397	2172	2872	0.25	G	G	1	20	4271	2857	0	5143	5143	1	1947
63	405	2172	2866	0	G	G	1	1	4271	3712	0	5143	3711	0	1947
63	417	2172	2844	0.25	G	G	1	25	4271	2857	0	5143	5143	1	1947
63	421	3100	3768	0	G	G	1	20	3463	5142	0	3178	3766	0	1947
63	803	2844	3100	0	G	G	1	22	2857	3463	0	5143	3178	0	1947
63	827	2866	3100	0	G	G	1	2	3712	3463	0	3711	3178	0	1947
63	833	2872	3100	0	G	G	1	17	2857	3463	0	5143	3178	0	1947
63	1100	2844	2872	0.5	G	G	1	5	2857	2857	1	5143	5143	1	1947
63	1117	2844	2866	0	G	G	1	24	2857	3712	0	5143	3711	0	1947
63	1163	2866	2872	0	G	G	1	19	3712	2857	0	3711	5143	0	1947
67	420	3768	4437	0	G	P	0	1	5142	3460	0	3766	3178	0	1947
67	422	3769	4437	0	G	P	0	2	5142	3460	0	3766	3178	0	1947
67	1196	3768	3769	0.375	G	G	1	3	5142	5142	1	3766	3766	1	1947
68	1196	3768	3769	0.375	G	G	1	3	5142	5142	1	3766	3766	1	1947
74	38	2148	3769	0	G	G	1	11	2145	5142	0	3178	3766	0	1947
74	40	2148	3768	0	G	G	1	14	2145	5142	0	3178	3766	0	1947
74	173	2784	3769	0	G	G	1	20	3566	5142	0	3565	3766	0	1947
74	174	2784	3768	0	G	G	1	17	3566	5142	0	3565	3766	0	1947
74	280	2936	3769	0	G	G	1	18	3566	5142	0	3564	3766	0	1947
74	282	2936	3768	0	G	G	1	21	3566	5142	0	3564	3766	0	1947
74	300	2148	2936	0	G	G	1	7	2145	3566	0	3178	3564	0	1947
74	465	2148	2784	0	G	G	1	31	2145	3566	0	3178	3565	0	1947
74	899	2784	2936	0.5	G	G	1	38	3566	3566	1	3565	3564	0	1947
74	1196	3768	3769	0.375	G	G	1	3	5142	5142	1	3766	3766	1	1947
13	352	2088	2822	0	P	G	0	1	2312	3814	0	2123	5156	0	1948
13	401	2125	2822	0	P	G	0	3	2312	3814	0	2123	5156	0	1948
13	410	2135	2822	0	P	G	0	4	2312	3814	0	3178	5156	0	1948
13	414	2146	2822	0	P	G	0	3	2145	3814	0	2144	5156	0	1948
13	428	2159	2822	0	B	G	0	23	2312	3814	0	2313	5156	0	1948
13	440	2088	2743	0.0625	P	P	1	18	2312	3563	0	2123	3954	0	1948
13	452	2088	2737	0	P	P	1	11	2312	3563	0	2123	4143	0	1948
13	480	2125	2743	0.0625	P	P	1	22	2312	3563	0	2123	3954	0	1948
13	485	2125	2737	0	P	P	1	7	2312	3563	0	2123	4143	0	1948
13	494	2135	2743	0.125	P	P	1	23	2312	3563	0	3178	3954	0	1948
13	497	2135	2737	0	P	P	1	6	2312	3563	0	3178	4143	0	1948
13	503	2088	2685	0.0625	P	P	1	12	2312	3563	0	2123	3954	0	1948
13	504	2146	2743	0	P	P	1	22	2145	3563	0	2144	3954	0	1948
13	510	2146	2737	0	P	P	1	7	2145	3563	0	2144	4143	0	1948
13	526	2159	2743	0.25	B	P	0	42	2312	3563	0	2313	3954	0	1948
13	530	2159	2737	0	B	P	0	13	2312	3563	0	2313	4143	0	1948
13	536	2125	2685	0.0625	P	P	1	16	2312	3563	0	2123	3954	0	1948
13	539	2135	2685	0.125	P	P	1	17	2312	3563	0	3178	3954	0	1948
13	543	2088	2631	0.0625	P	P	1	7	2312	3563	0	2123	3954	0	1948
13	553	2146	2685	0	P	P	1	16	2145	3563	0	2144	3954	0	1948
13	568	2159	2685	0.25	B	P	0	36	2312	3563	0	2313	3954	0	1948
13	574	2125	2631	0.0625	P	P	1	11	2312	3563	0	2123	3954	0	1948
13	581	2135	2631	0.125	P	P	1	12	2312	3563	0	3178	3954	0	1948
13	591	2146	2631	0	P	P	1	11	2145	3563	0	2144	3954	0	1948
13	606	2159	2631	0.25	B	P	0	31	2312	3563	0	2313	3954	0	1948
13	849	2631	2822	0	P	G	0	8	3563	3814	0	3954	5156	0	1948
13	909	2685	2822	0	P	G	0	13	3563	3814	0	3954	5156	0	1948
13	956	2631	2743	0.5	P	P	1	11	3563	3563	1	3954	3954	1	1948
13	981	2631	2737	0.5	P	P	1	18	3563	3563	1	3954	4143	0	1948
13	997	2737	2822	0	P	G	0	10	3563	3814	0	4143	5156	0	1948
13	1000	2743	2822	0	P	G	0	19	3563	3814	0	3954	5156	0	1948
13	1008	2088	2159	0.25	P	B	0	24	2312	2312	1	2123	2313	0	1948
13	1033	2088	2146	0	P	P	1	4	2312	2145	0	2123	2144	0	1948
13	1034	2685	2743	0.5	P	P	1	6	3563	3563	1	3954	3954	1	1948
13	1038	2631	2685	0.5	P	P	1	5	3563	3563	1	3954	3954	1	1948
13	1041	2685	2737	0.5	P	P	1	23	3563	3563	1	3954	4143	0	1948
13	1049	2088	2135	0.125	P	P	1	5	2312	2312	1	2123	3178	0	1948
13	1075	2088	2125	0.5	P	P	1	4	2312	2312	1	2123	2123	1	1948
13	1084	2125	2159	0.25	P	B	0	20	2312	2312	1	2123	2313	0	1948
13	1110	2135	2159	0.5	P	B	0	19	2312	2312	1	3178	2313	0	1948
13	1118	2125	2146	0	P	P	1	0	2312	2145	0	2123	2144	0	1948
13	1132	2146	2159	0	P	B	0	20	2145	2312	0	2144	2313	0	1948
13	1137	2135	2146	0	P	P	1	1	2312	2145	0	3178	2144	0	1948
13	1141	2125	2135	0.125	P	P	1	1	2312	2312	1	2123	3178	0	1948
13	1162	2737	2743	0.5	P	P	1	29	3563	3563	1	4143	3954	0	1948
24	477	2125	2747	0.25	P	P	1	16	2312	2312	1	2123	3564	0	1948
24	501	2149	2747	0	P	P	1	2	2145	2312	0	3178	3564	0	1948
24	517	2158	2747	0.125	B	P	0	2	2312	2312	1	2123	3564	0	1948
24	531	2125	2699	0.0625	P	P	1	25	2312	3563	0	2123	3954	0	1948
24	540	2149	2699	0	P	P	1	7	2145	3563	0	3178	3954	0	1948
24	548	2158	2699	0.125	B	P	0	11	2312	3563	0	2123	3954	0	1948
24	574	2125	2631	0.0625	P	P	1	11	2312	3563	0	2123	3954	0	1948
24	594	2149	2631	0	P	P	1	7	2145	3563	0	3178	3954	0	1948
24	604	2158	2631	0.125	B	P	0	3	2312	3563	0	2123	3954	0	1948
24	947	2631	2747	0.09375	P	P	1	5	3563	2312	0	3954	3564	0	1948
24	1014	2631	2699	0.5	P	P	1	14	3563	3563	1	3954	3954	1	1948
24	1048	2699	2747	0.09375	P	P	1	9	3563	2312	0	3954	3564	0	1948
24	1089	2125	2158	0.25	P	B	0	14	2312	2312	1	2123	2123	1	1948
24	1109	2125	2149	0	P	P	1	18	2312	2145	0	2123	3178	0	1948
24	1148	2149	2158	0	P	B	0	4	2145	2312	0	3178	2123	0	1948
32	268	2088	2926	0	P	W	0	11	2312	2819	0	2123	4274	0	1948
32	294	2125	2926	0	P	W	0	15	2312	2819	0	2123	4274	0	1948
32	310	2149	2926	0	P	W	0	3	2145	2819	0	3178	4274	0	1948
32	318	2158	2926	0	B	W	0	1	2312	2819	0	2123	4274	0	1948
32	320	2159	2926	0	B	W	0	35	2312	2819	0	2313	4274	0	1948
32	352	2088	2822	0	P	G	0	1	2312	3814	0	2123	5156	0	1948
32	401	2125	2822	0	P	G	0	3	2312	3814	0	2123	5156	0	1948
32	416	2149	2822	0	P	G	0	15	2145	3814	0	3178	5156	0	1948
32	425	2158	2822	0	B	G	0	11	2312	3814	0	2123	5156	0	1948
32	428	2159	2822	0	B	G	0	23	2312	3814	0	2313	5156	0	1948
32	432	2266	2926	0	P	W	0	19	3022	2819	0	3023	4274	0	1948
32	455	2279	2926	0	P	W	0	3	2294	2819	0	2311	4274	0	1948
32	489	2088	2699	0.0625	P	P	1	21	2312	3563	0	2123	3954	0	1948
32	503	2088	2685	0.0625	P	P	1	12	2312	3563	0	2123	3954	0	1948
32	531	2125	2699	0.0625	P	P	1	25	2312	3563	0	2123	3954	0	1948
32	536	2125	2685	0.0625	P	P	1	16	2312	3563	0	2123	3954	0	1948
32	537	2266	2822	0	P	G	0	7	3022	3814	0	3023	5156	0	1948
32	540	2149	2699	0	P	P	1	7	2145	3563	0	3178	3954	0	1948
32	545	2279	2822	0	P	G	0	9	2294	3814	0	2311	5156	0	1948
32	548	2158	2699	0.125	B	P	0	11	2312	3563	0	2123	3954	0	1948
32	551	2159	2699	0.25	B	P	0	45	2312	3563	0	2313	3954	0	1948
32	555	2149	2685	0	P	P	1	2	2145	3563	0	3178	3954	0	1948
32	567	2158	2685	0.125	B	P	0	2	2312	3563	0	2123	3954	0	1948
32	568	2159	2685	0.25	B	P	0	36	2312	3563	0	2313	3954	0	1948
32	635	2266	2699	0	P	P	1	29	3022	3563	0	3023	3954	0	1948
32	640	2279	2699	0	P	P	1	13	2294	3563	0	2311	3954	0	1948
32	641	2266	2685	0	P	P	1	20	3022	3563	0	3023	3954	0	1948
32	652	2279	2685	0	P	P	1	4	2294	3563	0	2311	3954	0	1948
32	818	2685	2926	0	P	W	0	1	3563	2819	0	3954	4274	0	1948
32	836	2699	2926	0	P	W	0	10	3563	2819	0	3954	4274	0	1948
32	847	2088	2279	0	P	P	1	8	2312	2294	0	2123	2311	0	1948
32	861	2088	2266	0	P	P	1	8	2312	3022	0	2123	3023	0	1948
32	896	2125	2279	0	P	P	1	12	2312	2294	0	2123	2311	0	1948
32	907	2125	2266	0	P	P	1	4	2312	3022	0	2123	3023	0	1948
32	909	2685	2822	0	P	G	0	13	3563	3814	0	3954	5156	0	1948
32	917	2149	2279	0	P	P	1	6	2145	2294	0	3178	2311	0	1948
32	932	2699	2822	0	P	G	0	22	3563	3814	0	3954	5156	0	1948
32	936	2158	2279	0	B	P	0	2	2312	2294	0	2123	2311	0	1948
32	937	2159	2279	0	B	P	0	32	2312	2294	0	2313	2311	0	1948
32	944	2149	2266	0	P	P	1	22	2145	3022	0	3178	3023	0	1948
32	972	2158	2266	0	B	P	0	18	2312	3022	0	2123	3023	0	1948
32	978	2159	2266	0	B	P	0	16	2312	3022	0	2313	3023	0	1948
32	986	2822	2926	0	G	W	0	12	3814	2819	0	5156	4274	0	1948
32	1008	2088	2159	0.25	P	B	0	24	2312	2312	1	2123	2313	0	1948
32	1010	2088	2158	0.25	P	B	0	10	2312	2312	1	2123	2123	1	1948
32	1023	2088	2149	0	P	P	1	14	2312	2145	0	2123	3178	0	1948
32	1075	2088	2125	0.5	P	P	1	4	2312	2312	1	2123	2123	1	1948
32	1084	2125	2159	0.25	P	B	0	20	2312	2312	1	2123	2313	0	1948
32	1089	2125	2158	0.25	P	B	0	14	2312	2312	1	2123	2123	1	1948
32	1109	2125	2149	0	P	P	1	18	2312	2145	0	2123	3178	0	1948
32	1129	2685	2699	0.5	P	P	1	9	3563	3563	1	3954	3954	1	1948
32	1133	2266	2279	0	P	P	1	16	3022	2294	0	3023	2311	0	1948
32	1143	2149	2159	0	P	B	0	38	2145	2312	0	3178	2313	0	1948
32	1148	2149	2158	0	P	B	0	4	2145	2312	0	3178	2123	0	1948
32	1189	2158	2159	0.5	B	B	1	34	2312	2312	1	2123	2313	0	1948
101	1196	3768	3769	0.375	G	G	1	3	5142	5142	1	3766	3766	1	1948
101	1198	2836	3769	0	G	G	1	12	3712	5142	0	3711	3766	0	1948
101	1200	2836	3768	0	G	G	1	14	3712	5142	0	3711	3766	0	1948
4	112	2013	3100	0	G	G	1	1	2006	3463	0	4280	3178	0	1949
4	116	2026	3100	0.0625	G	G	1	7	3731	3463	0	3711	3178	0	1949
4	246	2013	2872	0	G	G	1	18	2006	2857	0	4280	5143	0	1949
4	248	2013	2866	0	G	G	1	1	2006	3712	0	4280	3711	0	1949
4	255	2026	2872	0	G	G	1	24	3731	2857	0	3711	5143	0	1949
4	263	2026	2866	0.25	G	G	1	5	3731	3712	0	3711	3711	1	1949
4	285	2013	2836	0	G	G	1	2	2006	3712	0	4280	3711	0	1949
4	289	2026	2836	0.25	G	G	1	8	3731	3712	0	3711	3711	1	1949
4	797	2836	3100	0	G	G	1	1	3712	3463	0	3711	3178	0	1949
4	827	2866	3100	0	G	G	1	2	3712	3463	0	3711	3178	0	1949
4	833	2872	3100	0	G	G	1	17	2857	3463	0	5143	3178	0	1949
4	1080	2836	2872	0	G	G	1	16	3712	2857	0	3711	5143	0	1949
4	1095	2836	2866	0.5	G	G	1	3	3712	3712	1	3711	3711	1	1949
4	1130	2013	2026	0	G	G	1	6	2006	3731	0	4280	3711	0	1949
4	1163	2866	2872	0	G	G	1	19	3712	2857	0	3711	5143	0	1949
19	440	2088	2743	0.0625	P	P	1	18	2312	3563	0	2123	3954	0	1949
19	452	2088	2737	0	P	P	1	11	2312	3563	0	2123	4143	0	1949
19	480	2125	2743	0.0625	P	P	1	22	2312	3563	0	2123	3954	0	1949
19	485	2125	2737	0	P	P	1	7	2312	3563	0	2123	4143	0	1949
19	494	2135	2743	0.125	P	P	1	23	2312	3563	0	3178	3954	0	1949
19	497	2135	2737	0	P	P	1	6	2312	3563	0	3178	4143	0	1949
19	503	2088	2685	0.0625	P	P	1	12	2312	3563	0	2123	3954	0	1949
19	504	2146	2743	0	P	P	1	22	2145	3563	0	2144	3954	0	1949
19	510	2146	2737	0	P	P	1	7	2145	3563	0	2144	4143	0	1949
19	526	2159	2743	0.25	B	P	0	42	2312	3563	0	2313	3954	0	1949
19	530	2159	2737	0	B	P	0	13	2312	3563	0	2313	4143	0	1949
19	536	2125	2685	0.0625	P	P	1	16	2312	3563	0	2123	3954	0	1949
19	539	2135	2685	0.125	P	P	1	17	2312	3563	0	3178	3954	0	1949
19	543	2088	2631	0.0625	P	P	1	7	2312	3563	0	2123	3954	0	1949
19	553	2146	2685	0	P	P	1	16	2145	3563	0	2144	3954	0	1949
19	568	2159	2685	0.25	B	P	0	36	2312	3563	0	2313	3954	0	1949
19	574	2125	2631	0.0625	P	P	1	11	2312	3563	0	2123	3954	0	1949
19	581	2135	2631	0.125	P	P	1	12	2312	3563	0	3178	3954	0	1949
19	591	2146	2631	0	P	P	1	11	2145	3563	0	2144	3954	0	1949
19	606	2159	2631	0.25	B	P	0	31	2312	3563	0	2313	3954	0	1949
19	956	2631	2743	0.5	P	P	1	11	3563	3563	1	3954	3954	1	1949
19	981	2631	2737	0.5	P	P	1	18	3563	3563	1	3954	4143	0	1949
19	1008	2088	2159	0.25	P	B	0	24	2312	2312	1	2123	2313	0	1949
19	1033	2088	2146	0	P	P	1	4	2312	2145	0	2123	2144	0	1949
19	1034	2685	2743	0.5	P	P	1	6	3563	3563	1	3954	3954	1	1949
19	1038	2631	2685	0.5	P	P	1	5	3563	3563	1	3954	3954	1	1949
19	1041	2685	2737	0.5	P	P	1	23	3563	3563	1	3954	4143	0	1949
19	1049	2088	2135	0.125	P	P	1	5	2312	2312	1	2123	3178	0	1949
19	1075	2088	2125	0.5	P	P	1	4	2312	2312	1	2123	2123	1	1949
19	1084	2125	2159	0.25	P	B	0	20	2312	2312	1	2123	2313	0	1949
19	1110	2135	2159	0.5	P	B	0	19	2312	2312	1	3178	2313	0	1949
19	1118	2125	2146	0	P	P	1	0	2312	2145	0	2123	2144	0	1949
19	1132	2146	2159	0	P	B	0	20	2145	2312	0	2144	2313	0	1949
19	1137	2135	2146	0	P	P	1	1	2312	2145	0	3178	2144	0	1949
19	1141	2125	2135	0.125	P	P	1	1	2312	2312	1	2123	3178	0	1949
19	1162	2737	2743	0.5	P	P	1	29	3563	3563	1	4143	3954	0	1949
56	32	2046	3696	0	W	W	1	23	3586	3953	0	3178	4176	0	1949
56	43	2081	3696	0.5	W	W	1	16	3953	3953	1	4176	4176	1	1949
56	131	2046	3085	0	W	W	1	14	3586	4394	0	3178	4395	0	1949
56	156	2081	3085	0	W	W	1	7	3953	4394	0	4176	4395	0	1949
56	204	2791	3696	0.125	W	W	1	32	3953	3953	1	3956	4176	0	1949
56	212	2801	3696	0	W	W	1	9	4478	3953	0	2815	4176	0	1949
56	237	2046	2916	0	W	W	1	3	3586	4478	0	3178	2818	0	1949
56	273	2081	2916	0	W	W	1	10	3953	4478	0	4176	2818	0	1949
56	307	2916	3696	0	W	W	1	26	4478	3953	0	2818	4176	0	1949
56	339	2046	2801	0	W	W	1	14	3586	4478	0	3178	2815	0	1949
56	346	2046	2791	0	W	W	1	9	3586	3953	0	3178	3956	0	1949
56	380	2081	2801	0	W	W	1	7	3953	4478	0	4176	2815	0	1949
56	386	2081	2791	0.125	W	W	1	16	3953	3953	1	4176	3956	0	1949
56	492	3085	3696	0	W	W	1	9	4394	3953	0	4395	4176	0	1949
56	747	2791	3085	0	W	W	1	23	3953	4394	0	3956	4395	0	1949
56	761	2801	3085	0	W	W	1	0	4478	4394	0	2815	4395	0	1949
56	876	2916	3085	0	W	W	1	17	4478	4394	0	2818	4395	0	1949
56	928	2791	2916	0	W	W	1	6	3953	4478	0	3956	2818	0	1949
56	950	2801	2916	0.25	W	W	1	17	4478	4478	1	2815	2818	0	1949
56	1081	2046	2081	0	W	W	1	7	3586	3953	0	3178	4176	0	1949
56	1145	2791	2801	0	W	W	1	23	3953	4478	0	3956	2815	0	1949
20	521	2328	2916	0	W	W	1	12	4161	4478	0	3178	2818	0	1950
20	599	2328	2806	0	W	W	1	24	4161	4478	0	3178	2818	0	1950
20	619	2328	2787	0	W	W	1	30	4161	4478	0	3178	4479	0	1950
20	920	2787	2916	0.5	W	W	1	42	4478	4478	1	4479	2818	0	1950
20	965	2806	2916	0.25	W	W	1	12	4478	4478	1	2818	2818	1	1950
20	1121	2787	2806	0.25	W	W	1	54	4478	4478	1	4479	2818	0	1950
102	1196	3768	3769	0.375	G	G	1	3	5142	5142	1	3766	3766	1	1950
18	503	2088	2685	0.0625	P	P	1	12	2312	3563	0	2123	3954	0	1952
18	536	2125	2685	0.0625	P	P	1	16	2312	3563	0	2123	3954	0	1952
18	543	2088	2631	0.0625	P	P	1	7	2312	3563	0	2123	3954	0	1952
18	554	2148	2685	0	G	P	0	1	2145	3563	0	3178	3954	0	1952
18	567	2158	2685	0.125	B	P	0	2	2312	3563	0	2123	3954	0	1952
18	568	2159	2685	0.25	B	P	0	36	2312	3563	0	2313	3954	0	1952
18	574	2125	2631	0.0625	P	P	1	11	2312	3563	0	2123	3954	0	1952
18	592	2148	2631	0	G	P	0	4	2145	3563	0	3178	3954	0	1952
18	604	2158	2631	0.125	B	P	0	3	2312	3563	0	2123	3954	0	1952
18	606	2159	2631	0.25	B	P	0	31	2312	3563	0	2313	3954	0	1952
18	720	2088	2426	0	P	W	0	26	2312	3953	0	2123	3178	0	1952
18	741	2125	2426	0	P	W	0	30	2312	3953	0	2123	3178	0	1952
18	778	2148	2426	0.125	G	W	0	15	2145	3953	0	3178	3178	1	1952
18	792	2158	2426	0	B	W	0	16	2312	3953	0	2123	3178	0	1952
18	793	2159	2426	0	B	W	0	50	2312	3953	0	2313	3178	0	1952
18	800	2426	2685	0.015625	W	P	0	14	3953	3563	0	3178	3954	0	1952
18	843	2426	2631	0.015625	W	P	0	19	3953	3563	0	3178	3954	0	1952
18	1008	2088	2159	0.25	P	B	0	24	2312	2312	1	2123	2313	0	1952
18	1010	2088	2158	0.25	P	B	0	10	2312	2312	1	2123	2123	1	1952
18	1026	2088	2148	0	P	G	0	11	2312	2145	0	2123	3178	0	1952
18	1038	2631	2685	0.5	P	P	1	5	3563	3563	1	3954	3954	1	1952
18	1075	2088	2125	0.5	P	P	1	4	2312	2312	1	2123	2123	1	1952
18	1084	2125	2159	0.25	P	B	0	20	2312	2312	1	2123	2313	0	1952
18	1089	2125	2158	0.25	P	B	0	14	2312	2312	1	2123	2123	1	1952
18	1112	2125	2148	0	P	G	0	15	2312	2145	0	2123	3178	0	1952
18	1138	2148	2159	0	G	B	0	35	2145	2312	0	3178	2313	0	1952
18	1142	2148	2158	0	G	B	0	1	2145	2312	0	3178	2123	0	1952
18	1189	2158	2159	0.5	B	B	1	34	2312	2312	1	2123	2313	0	1952
25	461	2098	2737	0.125	B	P	0	39	2312	3563	0	3564	4143	0	1953
25	498	2098	2699	0.125	B	P	0	7	2312	3563	0	3564	3954	0	1953
25	522	2098	2685	0.125	B	P	0	16	2312	3563	0	3564	3954	0	1953
25	557	2098	2631	0.125	B	P	0	21	2312	3563	0	3564	3954	0	1953
25	623	2279	2737	0	P	P	1	19	2294	3563	0	2311	4143	0	1953
25	640	2279	2699	0	P	P	1	13	2294	3563	0	2311	3954	0	1953
25	652	2279	2685	0	P	P	1	4	2294	3563	0	2311	3954	0	1953
25	700	2279	2631	0	P	P	1	1	2294	3563	0	2311	3954	0	1953
25	853	2098	2279	0	B	P	0	20	2312	2294	0	3564	2311	0	1953
25	981	2631	2737	0.5	P	P	1	18	3563	3563	1	3954	4143	0	1953
25	1014	2631	2699	0.5	P	P	1	14	3563	3563	1	3954	3954	1	1953
25	1038	2631	2685	0.5	P	P	1	5	3563	3563	1	3954	3954	1	1953
25	1041	2685	2737	0.5	P	P	1	23	3563	3563	1	3954	4143	0	1953
25	1070	2699	2737	0.5	P	P	1	32	3563	3563	1	3954	4143	0	1953
25	1129	2685	2699	0.5	P	P	1	9	3563	3563	1	3954	3954	1	1953
26	489	2088	2699	0.0625	P	P	1	21	2312	3563	0	2123	3954	0	1954
26	548	2158	2699	0.125	B	P	0	11	2312	3563	0	2123	3954	0	1954
26	1010	2088	2158	0.25	P	B	0	10	2312	2312	1	2123	2123	1	1954
72	371	2148	2872	0	G	G	1	11	2145	2857	0	3178	5143	0	1955
103	300	2148	2936	0	G	G	1	7	2145	3566	0	3178	3564	0	1955
103	465	2148	2784	0	G	G	1	31	2145	3566	0	3178	3565	0	1955
103	467	2153	2784	0	P	G	0	40	2145	3566	0	3178	3565	0	1955
103	899	2784	2936	0.5	G	G	1	38	3566	3566	1	3565	3564	0	1955
103	1165	2148	2153	0.5	G	P	0	9	2145	2145	1	3178	3178	1	1955
103	1203	2149	2784	0	P	G	0	15	2145	3566	0	3178	3565	0	1955
103	1204	2153	2936	0	P	G	0	2	2145	3566	0	3178	3564	0	1955
103	1206	2149	2936	0	P	G	0	4	2145	3566	0	3178	3564	0	1955
103	1208	2149	2153	0.5	P	P	1	6	2145	2145	1	3178	3178	1	1955
103	1210	2148	2149	0.5	G	P	0	3	2145	2145	1	3178	3178	1	1955
1	112	2013	3100	0	G	G	1	1	2006	3463	0	4280	3178	0	1956
1	116	2026	3100	0.0625	G	G	1	7	3731	3463	0	3711	3178	0	1956
1	196	2172	3100	0	G	G	1	3	4271	3463	0	5143	3178	0	1956
1	246	2013	2872	0	G	G	1	18	2006	2857	0	4280	5143	0	1956
1	255	2026	2872	0	G	G	1	24	3731	2857	0	3711	5143	0	1956
1	285	2013	2836	0	G	G	1	2	2006	3712	0	4280	3711	0	1956
1	289	2026	2836	0.25	G	G	1	8	3731	3712	0	3711	3711	1	1956
1	397	2172	2872	0.25	G	G	1	20	4271	2857	0	5143	5143	1	1956
1	426	2172	2836	0	G	G	1	4	4271	3712	0	5143	3711	0	1956
1	797	2836	3100	0	G	G	1	1	3712	3463	0	3711	3178	0	1956
1	833	2872	3100	0	G	G	1	17	2857	3463	0	5143	3178	0	1956
1	890	2013	2172	0	G	G	1	2	2006	4271	0	4280	5143	0	1956
1	902	2026	2172	0	G	G	1	4	3731	4271	0	3711	5143	0	1956
1	1080	2836	2872	0	G	G	1	16	3712	2857	0	3711	5143	0	1956
1	1130	2013	2026	0	G	G	1	6	2006	3731	0	4280	3711	0	1956
57	116	2026	3100	0.0625	G	G	1	7	3731	3463	0	3711	3178	0	1956
57	189	2153	3100	0.125	P	G	0	3	2145	3463	0	3178	3178	1	1956
57	923	2026	2153	0	G	P	0	4	3731	2145	0	3711	3178	0	1956
104	255	2026	2872	0	G	G	1	24	3731	2857	0	3711	5143	0	1956
104	923	2026	2153	0	G	P	0	4	3731	2145	0	3711	3178	0	1956
104	1211	2153	2872	0	P	G	0	20	2145	2857	0	3178	5143	0	1956
11	17	2040	3793	0	W	P	0	13	3586	2006	0	3956	4280	0	1957
11	21	2088	3793	0	P	P	1	10	2312	2006	0	2123	4280	0	1957
11	22	2091	3793	0	P	P	1	14	2312	2006	0	3564	4280	0	1957
11	23	2092	3793	0	W	P	0	13	2312	2006	0	3564	4280	0	1957
11	24	2098	3793	0	B	P	0	18	2312	2006	0	3564	4280	0	1957
11	29	2125	3793	0	P	P	1	14	2312	2006	0	2123	4280	0	1957
11	30	2135	3793	0	P	P	1	15	2312	2006	0	3178	4280	0	1957
11	36	2157	3793	0	P	P	1	15	3022	2006	0	2123	4280	0	1957
11	80	2631	3793	0	P	P	1	3	3563	2006	0	3954	4280	0	1957
11	110	2685	3793	0	P	P	1	2	3563	2006	0	3954	4280	0	1957
11	111	2699	3793	0	P	P	1	11	3563	2006	0	3954	4280	0	1957
11	121	2737	3793	0	P	P	1	21	3563	2006	0	4143	4280	0	1957
11	124	2747	3793	0	P	P	1	2	2312	2006	0	3564	4280	0	1957
11	388	2040	2747	0	W	P	0	11	3586	2312	0	3956	3564	0	1957
11	399	2040	2737	0	W	P	0	34	3586	3563	0	3956	4143	0	1957
11	433	2040	2699	0.015625	W	P	0	2	3586	3563	0	3956	3954	0	1957
11	434	2088	2747	0.5	P	P	1	12	2312	2312	1	2123	3564	0	1957
11	439	2091	2747	0.375	P	P	1	12	2312	2312	1	3564	3564	1	1957
11	441	2092	2747	0.375	W	P	0	11	2312	2312	1	3564	3564	1	1957
11	452	2088	2737	0	P	P	1	11	2312	3563	0	2123	4143	0	1957
11	453	2098	2747	0.15625	B	P	0	16	2312	2312	1	3564	3564	1	1957
11	456	2091	2737	0.125	P	P	1	35	2312	3563	0	3564	4143	0	1957
11	457	2040	2685	0.015625	W	P	0	11	3586	3563	0	3956	3954	0	1957
11	458	2092	2737	0.125	W	P	0	34	2312	3563	0	3564	4143	0	1957
11	461	2098	2737	0.125	B	P	0	39	2312	3563	0	3564	4143	0	1957
11	477	2125	2747	0.25	P	P	1	16	2312	2312	1	2123	3564	0	1957
11	485	2125	2737	0	P	P	1	7	2312	3563	0	2123	4143	0	1957
11	486	2135	2747	0.0625	P	P	1	17	2312	2312	1	3178	3564	0	1957
11	489	2088	2699	0.0625	P	P	1	21	2312	3563	0	2123	3954	0	1957
11	493	2091	2699	0.09375	P	P	1	3	2312	3563	0	3564	3954	0	1957
11	496	2092	2699	0.09375	W	P	0	2	2312	3563	0	3564	3954	0	1957
11	497	2135	2737	0	P	P	1	6	2312	3563	0	3178	4143	0	1957
11	498	2098	2699	0.125	B	P	0	7	2312	3563	0	3564	3954	0	1957
11	503	2088	2685	0.0625	P	P	1	12	2312	3563	0	2123	3954	0	1957
11	506	2091	2685	0.09375	P	P	1	12	2312	3563	0	3564	3954	0	1957
11	508	2092	2685	0.09375	W	P	0	11	2312	3563	0	3564	3954	0	1957
11	509	2040	2631	0.015625	W	P	0	16	3586	3563	0	3956	3954	0	1957
11	513	2157	2747	0.125	P	P	1	13	3022	2312	0	2123	3564	0	1957
11	522	2098	2685	0.125	B	P	0	16	2312	3563	0	3564	3954	0	1957
11	528	2157	2737	0	P	P	1	36	3022	3563	0	2123	4143	0	1957
11	531	2125	2699	0.0625	P	P	1	25	2312	3563	0	2123	3954	0	1957
11	535	2135	2699	0.125	P	P	1	26	2312	3563	0	3178	3954	0	1957
11	536	2125	2685	0.0625	P	P	1	16	2312	3563	0	2123	3954	0	1957
11	539	2135	2685	0.125	P	P	1	17	2312	3563	0	3178	3954	0	1957
11	543	2088	2631	0.0625	P	P	1	7	2312	3563	0	2123	3954	0	1957
11	546	2157	2699	0.03125	P	P	1	4	3022	3563	0	2123	3954	0	1957
11	550	2091	2631	0.09375	P	P	1	17	2312	3563	0	3564	3954	0	1957
11	552	2092	2631	0.09375	W	P	0	16	2312	3563	0	3564	3954	0	1957
11	557	2098	2631	0.125	B	P	0	21	2312	3563	0	3564	3954	0	1957
11	564	2157	2685	0.03125	P	P	1	13	3022	3563	0	2123	3954	0	1957
11	574	2125	2631	0.0625	P	P	1	11	2312	3563	0	2123	3954	0	1957
11	581	2135	2631	0.125	P	P	1	12	2312	3563	0	3178	3954	0	1957
11	601	2157	2631	0.03125	P	P	1	18	3022	3563	0	2123	3954	0	1957
11	942	2040	2157	0	W	P	0	2	3586	3022	0	3956	2123	0	1957
11	947	2631	2747	0.09375	P	P	1	5	3563	2312	0	3954	3564	0	1957
11	981	2631	2737	0.5	P	P	1	18	3563	3563	1	3954	4143	0	1957
11	991	2040	2135	0.125	W	P	0	28	3586	2312	0	3956	3178	0	1957
11	994	2040	2125	0	W	P	0	27	3586	2312	0	3956	2123	0	1957
11	1012	2088	2157	0.25	P	P	1	25	2312	3022	0	2123	2123	1	1957
11	1014	2631	2699	0.5	P	P	1	14	3563	3563	1	3954	3954	1	1957
11	1015	2091	2157	0.125	P	P	1	1	2312	3022	0	3564	2123	0	1957
11	1017	2092	2157	0.125	W	P	0	2	2312	3022	0	3564	2123	0	1957
11	1021	2685	2747	0.09375	P	P	1	0	3563	2312	0	3954	3564	0	1957
11	1031	2098	2157	0.03125	B	P	0	3	2312	3022	0	3564	2123	0	1957
11	1032	2040	2098	0.0625	W	B	0	5	3586	2312	0	3956	3564	0	1957
11	1038	2631	2685	0.5	P	P	1	5	3563	3563	1	3954	3954	1	1957
11	1040	2040	2092	0	W	W	1	0	3586	2312	0	3956	3564	0	1957
11	1041	2685	2737	0.5	P	P	1	23	3563	3563	1	3954	4143	0	1957
11	1043	2040	2091	0	W	P	0	1	3586	2312	0	3956	3564	0	1957
11	1047	2040	2088	0	W	P	0	23	3586	2312	0	3956	2123	0	1957
11	1048	2699	2747	0.09375	P	P	1	9	3563	2312	0	3954	3564	0	1957
11	1049	2088	2135	0.125	P	P	1	5	2312	2312	1	2123	3178	0	1957
11	1057	2091	2135	0.0625	P	P	1	29	2312	2312	1	3564	3178	0	1957
11	1062	2092	2135	0.0625	W	P	0	28	2312	2312	1	3564	3178	0	1957
11	1070	2699	2737	0.5	P	P	1	32	3563	3563	1	3954	4143	0	1957
11	1075	2088	2125	0.5	P	P	1	4	2312	2312	1	2123	2123	1	1957
11	1076	2098	2135	0.5	B	P	0	33	2312	2312	1	3564	3178	0	1957
11	1083	2091	2125	0.25	P	P	0	28	2312	2312	1	3564	2123	0	1957
11	1088	2092	2125	0.25	W	P	0	27	2312	2312	1	3564	2123	0	1957
11	1090	2125	2157	0.25	P	P	1	29	2312	3022	0	2123	2123	1	1957
11	1103	2098	2125	0.0625	B	P	0	32	2312	2312	1	3564	2123	0	1957
11	1115	2135	2157	0.0625	P	P	1	30	2312	3022	0	3178	2123	0	1957
11	1129	2685	2699	0.5	P	P	1	9	3563	3563	1	3954	3954	1	1957
11	1140	2088	2098	0.0625	P	B	0	28	2312	2312	1	2123	3564	0	1957
11	1141	2125	2135	0.125	P	P	1	1	2312	2312	1	2123	3178	0	1957
11	1144	2737	2747	0.125	P	P	1	23	3563	2312	0	4143	3564	0	1957
11	1155	2091	2098	0.15625	P	B	0	4	2312	2312	1	3564	3564	1	1957
11	1160	2092	2098	0.15625	W	B	0	5	2312	2312	1	3564	3564	1	1957
11	1170	2088	2092	0.5	P	W	0	23	2312	2312	1	2123	3564	0	1957
11	1175	2088	2091	0.5	P	P	1	24	2312	2312	1	2123	3564	0	1957
11	1188	2091	2092	0.5	P	W	0	1	2312	2312	1	3564	3564	1	1957
16	388	2040	2747	0	W	P	0	11	3586	2312	0	3956	3564	0	1958
16	392	2040	2743	0.015625	W	P	0	5	3586	3563	0	3956	3954	0	1958
16	507	2153	2747	0	P	P	1	8	2145	2312	0	3178	3564	0	1958
16	512	2153	2743	0	P	P	1	2	2145	3563	0	3178	3954	0	1958
16	570	2040	2556	0.15625	W	W	1	1	3586	3953	0	3956	3178	0	1958
16	639	2040	2460	0	W	W	1	1	3586	4478	0	3956	2818	0	1958
16	655	2153	2556	0.125	P	W	0	4	2145	3953	0	3178	3178	1	1958
16	733	2153	2460	0	P	W	0	2	2145	4478	0	3178	2818	0	1958
16	757	2460	2747	0	W	P	0	10	4478	2312	0	2818	3564	0	1958
16	764	2460	2743	0	W	P	0	4	4478	3563	0	2818	3954	0	1958
16	848	2556	2747	0	W	P	0	12	3953	2312	0	3178	3564	0	1958
16	851	2556	2743	0.015625	W	P	0	6	3953	3563	0	3178	3954	0	1958
16	953	2040	2153	0.125	W	P	0	3	3586	2145	0	3956	3178	0	1958
16	990	2460	2556	0	W	W	1	2	4478	3953	0	2818	3178	0	1958
16	1171	2743	2747	0.09375	P	P	1	6	3563	2312	0	3954	3564	0	1958
91	471	2120	2747	0.5	P	P	1	18	2312	2312	1	3564	3564	1	1958
91	481	2120	2737	0.125	P	P	1	41	2312	3563	0	3564	4143	0	1958
91	529	2120	2699	0.09375	P	P	1	9	2312	3563	0	3564	3954	0	1958
91	534	2120	2685	0.09375	P	P	1	18	2312	3563	0	3564	3954	0	1958
91	571	2120	2631	0.09375	P	P	1	23	2312	3563	0	3564	3954	0	1958
91	947	2631	2747	0.09375	P	P	1	5	3563	2312	0	3954	3564	0	1958
91	981	2631	2737	0.5	P	P	1	18	3563	3563	1	3954	4143	0	1958
91	1014	2631	2699	0.5	P	P	1	14	3563	3563	1	3954	3954	1	1958
91	1021	2685	2747	0.09375	P	P	1	0	3563	2312	0	3954	3564	0	1958
91	1038	2631	2685	0.5	P	P	1	5	3563	3563	1	3954	3954	1	1958
91	1041	2685	2737	0.5	P	P	1	23	3563	3563	1	3954	4143	0	1958
91	1048	2699	2747	0.09375	P	P	1	9	3563	2312	0	3954	3564	0	1958
91	1070	2699	2737	0.5	P	P	1	32	3563	3563	1	3954	4143	0	1958
91	1129	2685	2699	0.5	P	P	1	9	3563	3563	1	3954	3954	1	1958
91	1144	2737	2747	0.125	P	P	1	23	3563	2312	0	4143	3564	0	1958
50	31	2040	3696	0.0625	W	W	1	35	3586	3953	0	3956	4176	0	1962
50	32	2046	3696	0	W	W	1	23	3586	3953	0	3178	4176	0	1962
50	86	2543	3696	0.09375	W	W	1	17	4161	3953	0	3178	4176	0	1962
50	212	2801	3696	0	W	W	1	9	4478	3953	0	2815	4176	0	1962
50	325	2040	2801	0	W	W	1	26	3586	4478	0	3956	2815	0	1962
50	339	2046	2801	0	W	W	1	14	3586	4478	0	3178	2815	0	1962
50	575	2040	2543	0.0625	W	W	1	18	3586	4161	0	3956	3178	0	1962
50	580	2046	2543	0.125	W	W	1	6	3586	4161	0	3178	3178	1	1962
50	802	2543	2801	0	W	W	1	8	4161	4478	0	3178	2815	0	1962
50	1157	2040	2046	0.5	W	W	1	12	3586	3586	1	3956	3178	0	1962
5	220	2806	3696	0	W	W	1	38	4478	3953	0	2818	4176	0	1965
5	221	2807	3696	0	W	W	1	44	4478	3953	0	2818	4176	0	1965
5	1191	2806	2807	0.5	W	W	1	6	4478	4478	1	2818	2818	1	1965
8	123	2040	3088	0.125	W	W	1	9	3586	4394	0	3956	3178	0	1965
8	125	2040	3085	0	W	W	1	26	3586	4394	0	3956	4395	0	1965
8	126	2040	3084	0.125	W	W	1	0	3586	4159	0	3956	3178	0	1965
8	129	2046	3088	0.25	W	W	1	21	3586	4394	0	3178	3178	1	1965
8	131	2046	3085	0	W	W	1	14	3586	4394	0	3178	4395	0	1965
8	132	2046	3084	0.25	W	W	1	12	3586	4159	0	3178	3178	1	1965
8	136	2057	3088	0.125	W	W	1	3	3586	4394	0	3956	3178	0	1965
8	137	2057	3085	0	W	W	1	38	3586	4394	0	3956	4395	0	1965
8	138	2057	3084	0.125	W	W	1	12	3586	4159	0	3956	3178	0	1965
8	153	2040	3045	0.5	W	W	1	6	3586	3586	1	3956	3956	1	1965
8	154	2083	3088	0.125	W	W	1	4	3953	4394	0	3178	3178	1	1965
8	159	2085	3088	0.125	W	W	1	1	3953	4394	0	3178	3178	1	1965
8	160	2083	3085	0	W	W	1	31	3953	4394	0	3178	4395	0	1965
8	162	2083	3084	0.125	W	W	1	5	3953	4159	0	3178	3178	1	1965
8	163	2085	3085	0	W	W	1	36	3953	4394	0	3178	4395	0	1965
8	164	2046	3045	0.5	W	W	1	18	3586	3586	1	3178	3956	0	1965
8	165	2085	3084	0.125	W	W	1	10	3953	4159	0	3178	3178	1	1965
8	171	2057	3045	0.375	W	W	1	6	3586	3586	1	3956	3956	1	1965
8	180	2083	3045	0.15625	W	W	1	1	3953	3586	0	3178	3956	0	1965
8	181	2085	3045	0.15625	W	W	1	4	3953	3586	0	3178	3956	0	1965
8	230	2040	2917	0	W	W	1	5	3586	4478	0	3956	2818	0	1965
8	236	2046	2917	0	W	W	1	7	3586	4478	0	3178	2818	0	1965
8	245	2057	2917	0	W	W	1	17	3586	4478	0	3956	2818	0	1965
8	275	2083	2917	0	W	W	1	10	3953	4478	0	3178	2818	0	1965
8	281	2085	2917	0	W	W	1	15	3953	4478	0	3178	2818	0	1965
8	319	2040	2807	0	W	W	1	9	3586	4478	0	3956	2818	0	1965
8	321	2040	2806	0	W	W	1	3	3586	4478	0	3956	2818	0	1965
8	326	2046	2807	0	W	W	1	21	3586	4478	0	3178	2818	0	1965
8	328	2046	2806	0	W	W	1	15	3586	4478	0	3178	2818	0	1965
8	342	2057	2807	0	W	W	1	3	3586	4478	0	3956	2818	0	1965
8	344	2057	2806	0	W	W	1	9	3586	4478	0	3956	2818	0	1965
8	369	2083	2807	0	W	W	1	4	3953	4478	0	3178	2818	0	1965
8	373	2083	2806	0	W	W	1	2	3953	4478	0	3178	2818	0	1965
8	375	2085	2807	0	W	W	1	1	3953	4478	0	3178	2818	0	1965
8	378	2085	2806	0	W	W	1	7	3953	4478	0	3178	2818	0	1965
8	429	2426	3088	0.125	W	W	1	6	3953	4394	0	3178	3178	1	1965
8	436	2426	3085	0	W	W	1	29	3953	4394	0	3178	4395	0	1965
8	437	2426	3084	0.125	W	W	1	3	3953	4159	0	3178	3178	1	1965
8	478	2426	3045	0.15625	W	W	1	3	3953	3586	0	3178	3956	0	1965
8	542	2543	3088	0.0625	W	W	1	27	4161	4394	0	3178	3178	1	1965
8	547	2543	3085	0	W	W	1	8	4161	4394	0	3178	4395	0	1965
8	549	2543	3084	0.0625	W	W	1	18	4161	4159	0	3178	3178	1	1965
8	560	2556	3088	0.125	W	W	1	8	3953	4394	0	3178	3178	1	1965
8	563	2556	3085	0	W	W	1	27	3953	4394	0	3178	4395	0	1965
8	566	2556	3084	0.125	W	W	1	1	3953	4159	0	3178	3178	1	1965
8	570	2040	2556	0.15625	W	W	1	1	3586	3953	0	3956	3178	0	1965
8	572	2046	2556	0.25	W	W	1	13	3586	3953	0	3178	3178	1	1965
8	575	2040	2543	0.0625	W	W	1	18	3586	4161	0	3956	3178	0	1965
8	576	2543	3045	0.0625	W	W	1	24	4161	3586	0	3178	3956	0	1965
8	579	2057	2556	0.15625	W	W	1	11	3586	3953	0	3956	3178	0	1965
8	580	2046	2543	0.125	W	W	1	6	3586	4161	0	3178	3178	1	1965
8	585	2426	2917	0	W	W	1	8	3953	4478	0	3178	2818	0	1965
8	587	2556	3045	0.15625	W	W	1	5	3953	3586	0	3178	3956	0	1965
8	589	2057	2543	0.0625	W	W	1	30	3586	4161	0	3956	3178	0	1965
8	603	2083	2556	0.5	W	W	1	4	3953	3953	1	3178	3178	1	1965
8	608	2085	2556	0.5	W	W	1	9	3953	3953	1	3178	3178	1	1965
8	618	2083	2543	0.109375	W	W	1	23	3953	4161	0	3178	3178	1	1965
8	622	2085	2543	0.109375	W	W	1	28	3953	4161	0	3178	3178	1	1965
8	674	2040	2426	0.15625	W	W	1	3	3586	3953	0	3956	3178	0	1965
8	679	2426	2807	0	W	W	1	6	3953	4478	0	3178	2818	0	1965
8	680	2046	2426	0.25	W	W	1	15	3586	3953	0	3178	3178	1	1965
8	681	2426	2806	0	W	W	1	0	3953	4478	0	3178	2818	0	1965
8	687	2543	2917	0	W	W	1	13	4161	4478	0	3178	2818	0	1965
8	691	2057	2426	0.15625	W	W	1	9	3586	3953	0	3956	3178	0	1965
8	696	2556	2917	0	W	W	1	6	3953	4478	0	3178	2818	0	1965
8	714	2083	2426	0.25	W	W	1	2	3953	3953	1	3178	3178	1	1965
8	717	2085	2426	0.25	W	W	1	7	3953	3953	1	3178	3178	1	1965
8	768	2806	3088	0	W	W	1	6	4478	4394	0	2818	3178	0	1965
8	771	2807	3088	0	W	W	1	0	4478	4394	0	2818	3178	0	1965
8	775	2806	3085	0	W	W	1	29	4478	4394	0	2818	4395	0	1965
8	779	2806	3084	0	W	W	1	3	4478	4159	0	2818	3178	0	1965
8	780	2807	3085	0	W	W	1	35	4478	4394	0	2818	4395	0	1965
8	782	2807	3084	0	W	W	1	9	4478	4159	0	2818	3178	0	1965
8	796	2543	2807	0	W	W	1	27	4161	4478	0	3178	2818	0	1965
8	798	2543	2806	0	W	W	1	21	4161	4478	0	3178	2818	0	1965
8	809	2556	2807	0	W	W	1	8	3953	4478	0	3178	2818	0	1965
8	810	2556	2806	0	W	W	1	2	3953	4478	0	3178	2818	0	1965
8	821	2806	3045	0	W	W	1	3	4478	3586	0	2818	3956	0	1965
8	822	2807	3045	0	W	W	1	3	4478	3586	0	2818	3956	0	1965
8	871	2917	3088	0	W	W	1	14	4478	4394	0	2818	3178	0	1965
8	880	2917	3085	0	W	W	1	21	4478	4394	0	2818	4395	0	1965
8	881	2917	3084	0	W	W	1	5	4478	4159	0	2818	3178	0	1965
8	918	2426	2556	0.25	W	W	1	2	3953	3953	1	3178	3178	1	1965
8	922	2917	3045	0	W	W	1	11	4478	3586	0	2818	3956	0	1965
8	945	2426	2543	0.109375	W	W	1	21	3953	4161	0	3178	3178	1	1965
8	962	2806	2917	0.25	W	W	1	8	4478	4478	1	2818	2818	1	1965
8	966	2807	2917	0.25	W	W	1	14	4478	4478	1	2818	2818	1	1965
8	1054	2040	2085	0.15625	W	W	1	10	3586	3953	0	3956	3178	0	1965
8	1061	2040	2083	0.15625	W	W	1	5	3586	3953	0	3956	3178	0	1965
8	1064	3045	3088	0.125	W	W	1	3	3586	4394	0	3956	3178	0	1965
8	1067	3045	3085	0	W	W	1	32	3586	4394	0	3956	4395	0	1965
8	1068	2046	2085	0.25	W	W	1	22	3586	3953	0	3178	3178	1	1965
8	1069	3045	3084	0.125	W	W	1	6	3586	4159	0	3956	3178	0	1965
8	1074	2046	2083	0.25	W	W	1	17	3586	3953	0	3178	3178	1	1965
8	1096	2057	2085	0.15625	W	W	1	2	3586	3953	0	3956	3178	0	1965
8	1104	2057	2083	0.15625	W	W	1	7	3586	3953	0	3956	3178	0	1965
8	1125	2040	2057	0.375	W	W	1	12	3586	3586	1	3956	3956	1	1965
8	1134	2543	2556	0.109375	W	W	1	19	4161	3953	0	3178	3178	1	1965
8	1135	2046	2057	0.5	W	W	1	24	3586	3586	1	3178	3956	0	1965
8	1157	2040	2046	0.5	W	W	1	12	3586	3586	1	3956	3178	0	1965
8	1173	3084	3088	0.25	W	W	1	9	4159	4394	0	3178	3178	1	1965
8	1178	3085	3088	0.5	W	W	1	35	4394	4394	1	4395	3178	0	1965
8	1180	2083	2085	0.5	W	W	1	5	3953	3953	1	3178	3178	1	1965
8	1191	2806	2807	0.5	W	W	1	6	4478	4478	1	2818	2818	1	1965
8	1195	3084	3085	0	W	W	1	26	4159	4394	0	3178	4395	0	1965
14	123	2040	3088	0.125	W	W	1	9	3586	4394	0	3956	3178	0	1965
14	125	2040	3085	0	W	W	1	26	3586	4394	0	3956	4395	0	1965
14	129	2046	3088	0.25	W	W	1	21	3586	4394	0	3178	3178	1	1965
14	131	2046	3085	0	W	W	1	14	3586	4394	0	3178	4395	0	1965
14	145	2077	3088	0	W	W	1	3	3953	4394	0	3956	3178	0	1965
14	148	2077	3085	0	W	W	1	32	3953	4394	0	3956	4395	0	1965
14	150	2081	3088	0	W	W	1	28	3953	4394	0	4176	3178	0	1965
14	154	2083	3088	0.125	W	W	1	4	3953	4394	0	3178	3178	1	1965
14	156	2081	3085	0	W	W	1	7	3953	4394	0	4176	4395	0	1965
14	160	2083	3085	0	W	W	1	31	3953	4394	0	3178	4395	0	1965
14	170	2099	3088	0.0625	P	W	0	2	2312	4394	0	3564	3178	0	1965
14	172	2099	3085	0	P	W	0	33	2312	4394	0	3564	4395	0	1965
14	229	2040	2918	0	W	W	1	6	3586	4478	0	3956	2818	0	1965
14	234	2046	2918	0	W	W	1	18	3586	4478	0	3178	2818	0	1965
14	261	2077	2918	0	W	W	1	0	3953	4478	0	3956	2818	0	1965
14	269	2081	2918	0	W	W	1	25	3953	4478	0	4176	2818	0	1965
14	274	2083	2918	0	W	W	1	1	3953	4478	0	3178	2818	0	1965
14	286	2099	2918	0	P	W	0	1	2312	4478	0	3564	2818	0	1965
14	319	2040	2807	0	W	W	1	9	3586	4478	0	3956	2818	0	1965
14	326	2046	2807	0	W	W	1	21	3586	4478	0	3178	2818	0	1965
14	330	2328	3088	0.0625	W	W	1	30	4161	4394	0	3178	3178	1	1965
14	336	2328	3085	0	W	W	1	5	4161	4394	0	3178	4395	0	1965
14	358	2077	2807	0	W	W	1	3	3953	4478	0	3956	2818	0	1965
14	364	2081	2807	0	W	W	1	28	3953	4478	0	4176	2818	0	1965
14	369	2083	2807	0	W	W	1	4	3953	4478	0	3178	2818	0	1965
14	387	2099	2807	0	P	W	0	2	2312	4478	0	3564	2818	0	1965
14	429	2426	3088	0.125	W	W	1	6	3953	4394	0	3178	3178	1	1965
14	436	2426	3085	0	W	W	1	29	3953	4394	0	3178	4395	0	1965
14	514	2328	2918	0	W	W	1	27	4161	4478	0	3178	2818	0	1965
14	560	2556	3088	0.125	W	W	1	8	3953	4394	0	3178	3178	1	1965
14	563	2556	3085	0	W	W	1	27	3953	4394	0	3178	4395	0	1965
14	570	2040	2556	0.15625	W	W	1	1	3586	3953	0	3956	3178	0	1965
14	572	2046	2556	0.25	W	W	1	13	3586	3953	0	3178	3178	1	1965
14	584	2426	2918	0	W	W	1	3	3953	4478	0	3178	2818	0	1965
14	596	2077	2556	0.0625	W	W	1	5	3953	3953	1	3956	3178	0	1965
14	597	2328	2807	0	W	W	1	30	4161	4478	0	3178	2818	0	1965
14	600	2081	2556	0.5	W	W	1	20	3953	3953	1	4176	3178	0	1965
14	603	2083	2556	0.5	W	W	1	4	3953	3953	1	3178	3178	1	1965
14	625	2099	2556	0.0625	P	W	0	6	2312	3953	0	3564	3178	0	1965
14	674	2040	2426	0.15625	W	W	1	3	3586	3953	0	3956	3178	0	1965
14	679	2426	2807	0	W	W	1	6	3953	4478	0	3178	2818	0	1965
14	680	2046	2426	0.25	W	W	1	15	3586	3953	0	3178	3178	1	1965
14	695	2556	2918	0	W	W	1	5	3953	4478	0	3178	2818	0	1965
14	704	2077	2426	0.0625	W	W	1	3	3953	3953	1	3956	3178	0	1965
14	712	2081	2426	0.25	W	W	1	22	3953	3953	1	4176	3178	0	1965
14	714	2083	2426	0.25	W	W	1	2	3953	3953	1	3178	3178	1	1965
14	724	2099	2426	0.0625	P	W	0	4	2312	3953	0	3564	3178	0	1965
14	756	2040	2328	0.0625	W	W	1	21	3586	4161	0	3956	3178	0	1965
14	767	2046	2328	0.125	W	W	1	9	3586	4161	0	3178	3178	1	1965
14	771	2807	3088	0	W	W	1	0	4478	4394	0	2818	3178	0	1965
14	780	2807	3085	0	W	W	1	35	4478	4394	0	2818	4395	0	1965
14	808	2077	2328	0	W	W	1	27	3953	4161	0	3956	3178	0	1965
14	809	2556	2807	0	W	W	1	8	3953	4478	0	3178	2818	0	1965
14	812	2081	2328	0.09375	W	W	1	2	3953	4161	0	4176	3178	0	1965
14	814	2083	2328	0.109375	W	W	1	26	3953	4161	0	3178	3178	1	1965
14	831	2099	2328	0.0625	P	W	0	28	2312	4161	0	3564	3178	0	1965
14	832	2328	2556	0.109375	W	W	1	22	4161	3953	0	3178	3178	1	1965
14	874	2918	3088	0	W	W	1	3	4478	4394	0	2818	3178	0	1965
14	882	2918	3085	0	W	W	1	32	4478	4394	0	2818	4395	0	1965
14	918	2426	2556	0.25	W	W	1	2	3953	3953	1	3178	3178	1	1965
14	963	2807	2918	0.25	W	W	1	3	4478	4478	1	2818	2818	1	1965
14	989	2328	2426	0.109375	W	W	1	24	4161	3953	0	3178	3178	1	1965
14	1030	2040	2099	0.0625	W	P	0	7	3586	2312	0	3956	3564	0	1965
14	1039	2046	2099	0.125	W	P	0	19	3586	2312	0	3178	3564	0	1965
14	1061	2040	2083	0.15625	W	W	1	5	3586	3953	0	3956	3178	0	1965
14	1065	2040	2081	0.0625	W	W	1	19	3586	3953	0	3956	4176	0	1965
14	1073	2040	2077	0.25	W	W	1	6	3586	3953	0	3956	3956	1	1965
14	1074	2046	2083	0.25	W	W	1	17	3586	3953	0	3178	3178	1	1965
14	1081	2046	2081	0	W	W	1	7	3586	3953	0	3178	4176	0	1965
14	1092	2046	2077	0	W	W	1	18	3586	3953	0	3178	3956	0	1965
14	1114	2077	2099	0	W	P	0	1	3953	2312	0	3956	3564	0	1965
14	1123	2081	2099	0	W	P	0	26	3953	2312	0	4176	3564	0	1965
14	1126	2083	2099	0.0625	W	P	0	2	3953	2312	0	3178	3564	0	1965
14	1157	2040	2046	0.5	W	W	1	12	3586	3586	1	3956	3178	0	1965
14	1159	2077	2083	0.0625	W	W	1	1	3953	3953	1	3956	3178	0	1965
14	1168	2077	2081	0.125	W	W	1	25	3953	3953	1	3956	4176	0	1965
14	1178	3085	3088	0.5	W	W	1	35	4394	4394	1	4395	3178	0	1965
14	1179	2081	2083	0.5	W	W	1	24	3953	3953	1	4176	3178	0	1965
6	81	2040	3200	0	W	W	1	17	3586	4478	0	3956	2818	0	1967
6	84	2046	3200	0	W	W	1	29	3586	4478	0	3178	2818	0	1967
6	88	2050	3200	0	W	W	1	8	3586	4478	0	3956	2818	0	1967
6	113	2120	3200	0	P	W	0	10	2312	4478	0	3564	2818	0	1967
6	122	2040	3090	0.125	W	W	1	16	3586	4394	0	3956	3178	0	1967
6	123	2040	3088	0.125	W	W	1	9	3586	4394	0	3956	3178	0	1967
6	127	2046	3090	0.25	W	W	1	28	3586	4394	0	3178	3178	1	1967
6	128	2157	3200	0	P	W	0	15	3022	4478	0	2123	2818	0	1967
6	129	2046	3088	0.25	W	W	1	21	3586	4394	0	3178	3178	1	1967
6	130	2050	3090	0.125	W	W	1	7	3586	4394	0	3956	3178	0	1967
6	133	2050	3088	0.125	W	W	1	0	3586	4394	0	3956	3178	0	1967
6	175	2120	3090	0	P	W	0	9	2312	4394	0	3564	3178	0	1967
6	178	2120	3088	0	P	W	0	2	2312	4394	0	3564	3178	0	1967
6	194	2157	3090	0	P	W	0	14	3022	4394	0	2123	3178	0	1967
6	195	2157	3088	0	P	W	0	7	3022	4394	0	2123	3178	0	1967
6	200	2279	3200	0	P	W	0	32	2294	4478	0	2311	2818	0	1967
6	223	2040	2926	0	W	W	1	12	3586	2819	0	3956	4274	0	1967
6	226	2046	2926	0	W	W	1	0	3586	2819	0	3178	4274	0	1967
6	230	2040	2917	0	W	W	1	5	3586	4478	0	3956	2818	0	1967
6	231	2040	2916	0	W	W	1	9	3586	4478	0	3956	2818	0	1967
6	232	2050	2926	0	W	W	1	21	3586	2819	0	3956	4274	0	1967
6	235	2328	3200	0	W	W	1	38	4161	4478	0	3178	2818	0	1967
6	236	2046	2917	0	W	W	1	7	3586	4478	0	3178	2818	0	1967
6	237	2046	2916	0	W	W	1	3	3586	4478	0	3178	2818	0	1967
6	241	2050	2917	0	W	W	1	14	3586	4478	0	3956	2818	0	1967
6	242	2050	2916	0	W	W	1	18	3586	4478	0	3956	2818	0	1967
6	287	2040	2852	0	W	W	1	7	3586	3022	0	3956	2123	0	1967
6	288	2279	3090	0	P	W	0	31	2294	4394	0	2311	3178	0	1967
6	290	2279	3088	0	P	W	0	24	2294	4394	0	2311	3178	0	1967
6	291	2046	2852	0	W	W	1	19	3586	3022	0	3178	2123	0	1967
6	292	2120	2926	0	P	W	0	19	2312	2819	0	3564	4274	0	1967
6	293	2050	2852	0	W	W	1	2	3586	3022	0	3956	2123	0	1967
6	295	2120	2917	0	P	W	0	12	2312	4478	0	3564	2818	0	1967
6	297	2120	2916	0	P	W	0	16	2312	4478	0	3564	2818	0	1967
6	312	2426	3200	0	W	W	1	14	3953	4478	0	3178	2818	0	1967
6	316	2040	2809	0	W	W	1	11	3586	4478	0	3956	2818	0	1967
6	317	2157	2926	0	P	W	0	14	3022	2819	0	2123	4274	0	1967
6	319	2040	2807	0	W	W	1	9	3586	4478	0	3956	2818	0	1967
6	323	2046	2809	0	W	W	1	23	3586	4478	0	3178	2818	0	1967
6	324	2328	3090	0.0625	W	W	1	37	4161	4394	0	3178	3178	1	1967
6	326	2046	2807	0	W	W	1	21	3586	4478	0	3178	2818	0	1967
6	329	2157	2917	0	P	W	0	7	3022	4478	0	2123	2818	0	1967
6	330	2328	3088	0.0625	W	W	1	30	4161	4394	0	3178	3178	1	1967
6	331	2050	2809	0	W	W	1	2	3586	4478	0	3956	2818	0	1967
6	332	2157	2916	0	P	W	0	11	3022	4478	0	2123	2818	0	1967
6	335	2050	2807	0	W	W	1	0	3586	4478	0	3956	2818	0	1967
6	348	2460	3200	0.3125	W	W	1	18	4478	4478	1	2818	2818	1	1967
6	356	2120	2852	0.09375	P	W	0	0	2312	3022	0	3564	2123	0	1967
6	388	2040	2747	0	W	P	0	11	3586	2312	0	3956	3564	0	1967
6	389	2040	2746	0.0078125	W	P	0	11	3586	2312	0	3956	3954	0	1967
6	394	2046	2747	0	W	P	0	1	3586	2312	0	3178	3564	0	1967
6	395	2046	2746	0	W	P	0	23	3586	2312	0	3178	3954	0	1967
6	400	2050	2747	0	W	P	0	20	3586	2312	0	3956	3564	0	1967
6	402	2050	2746	0.0078125	W	P	0	2	3586	2312	0	3956	3954	0	1967
6	404	2157	2852	0.34375	P	W	0	5	3022	3022	1	2123	2123	1	1967
6	407	2120	2809	0	P	W	0	4	2312	4478	0	3564	2818	0	1967
6	409	2120	2807	0	P	W	0	2	2312	4478	0	3564	2818	0	1967
6	427	2426	3090	0.125	W	W	1	13	3953	4394	0	3178	3178	1	1967
6	429	2426	3088	0.125	W	W	1	6	3953	4394	0	3178	3178	1	1967
6	433	2040	2699	0.015625	W	P	0	2	3586	3563	0	3956	3954	0	1967
6	445	2046	2699	0	W	P	0	10	3586	3563	0	3178	3954	0	1967
6	447	2157	2809	0	P	W	0	9	3022	4478	0	2123	2818	0	1967
6	450	2157	2807	0	P	W	0	7	3022	4478	0	2123	2818	0	1967
6	451	2050	2699	0.015625	W	P	0	11	3586	3563	0	3956	3954	0	1967
6	455	2279	2926	0	P	W	0	3	2294	2819	0	2311	4274	0	1967
6	463	2279	2917	0	P	W	0	10	2294	4478	0	2311	2818	0	1967
6	464	2279	2916	0	P	W	0	6	2294	4478	0	2311	2818	0	1967
6	468	2460	3090	0	W	W	1	17	4478	4394	0	2818	3178	0	1967
6	470	2460	3088	0	W	W	1	10	4478	4394	0	2818	3178	0	1967
6	471	2120	2747	0.5	P	P	1	18	2312	2312	1	3564	3564	1	1967
6	473	2120	2746	0.296875	P	P	1	4	2312	2312	1	3564	3954	0	1967
6	502	2328	2926	0	W	W	1	9	4161	2819	0	3178	4274	0	1967
6	509	2040	2631	0.015625	W	P	0	16	3586	3563	0	3956	3954	0	1967
6	513	2157	2747	0.125	P	P	1	13	3022	2312	0	2123	3564	0	1967
6	516	2157	2746	0.078125	P	P	1	9	3022	2312	0	2123	3954	0	1967
6	519	2328	2917	0	W	W	1	16	4161	4478	0	3178	2818	0	1967
6	521	2328	2916	0	W	W	1	12	4161	4478	0	3178	2818	0	1967
6	523	2046	2631	0	W	P	0	4	3586	3563	0	3178	3954	0	1967
6	527	2050	2631	0.015625	W	P	0	25	3586	3563	0	3956	3954	0	1967
6	529	2120	2699	0.09375	P	P	1	9	2312	3563	0	3564	3954	0	1967
6	532	2279	2852	0	P	W	0	22	2294	3022	0	2311	2123	0	1967
6	533	2631	3200	0	P	W	0	33	3563	4478	0	3954	2818	0	1967
6	546	2157	2699	0.03125	P	P	1	4	3022	3563	0	2123	3954	0	1967
6	562	2279	2809	0	P	W	0	26	2294	4478	0	2311	2818	0	1967
6	565	2279	2807	0	P	W	0	24	2294	4478	0	2311	2818	0	1967
6	569	2328	2852	0	W	W	1	28	4161	3022	0	3178	2123	0	1967
6	571	2120	2631	0.09375	P	P	1	23	2312	3563	0	3564	3954	0	1967
6	577	2699	3200	0	P	W	0	19	3563	4478	0	3954	2818	0	1967
6	578	2426	2926	0	W	W	1	15	3953	2819	0	3178	4274	0	1967
6	585	2426	2917	0	W	W	1	8	3953	4478	0	3178	2818	0	1967
6	586	2426	2916	0	W	W	1	12	3953	4478	0	3178	2818	0	1967
6	595	2328	2809	0	W	W	1	32	4161	4478	0	3178	2818	0	1967
6	597	2328	2807	0	W	W	1	30	4161	4478	0	3178	2818	0	1967
6	601	2157	2631	0.03125	P	P	1	18	3022	3563	0	2123	3954	0	1967
6	611	2279	2747	0	P	P	1	4	2294	2312	0	2311	3564	0	1967
6	613	2279	2746	0	P	P	1	26	2294	2312	0	2311	3954	0	1967
6	614	2460	2926	0	W	W	1	11	4478	2819	0	2818	4274	0	1967
6	621	2631	3090	0	P	W	0	32	3563	4394	0	3954	3178	0	1967
6	626	2460	2917	0.25	W	W	1	4	4478	4478	1	2818	2818	1	1967
6	627	2631	3088	0	P	W	0	25	3563	4394	0	3954	3178	0	1967
6	628	2460	2916	0.25	W	W	1	8	4478	4478	1	2818	2818	1	1967
6	631	2746	3200	0	P	W	0	6	2312	4478	0	3954	2818	0	1967
6	632	2747	3200	0	P	W	0	28	2312	4478	0	3564	2818	0	1967
6	637	2426	2852	0	W	W	1	4	3953	3022	0	3178	2123	0	1967
6	639	2040	2460	0	W	W	1	1	3586	4478	0	3956	2818	0	1967
6	640	2279	2699	0	P	P	1	13	2294	3563	0	2311	3954	0	1967
6	642	2328	2747	0	W	P	0	10	4161	2312	0	3178	3564	0	1967
6	644	2328	2746	0	W	P	0	32	4161	2312	0	3178	3954	0	1967
6	646	2046	2460	0	W	W	1	11	3586	4478	0	3178	2818	0	1967
6	649	2050	2460	0	W	W	1	10	3586	4478	0	3956	2818	0	1967
6	667	2807	3200	0.3125	W	W	1	8	4478	4478	1	2818	2818	1	1967
6	668	2460	2852	0	W	W	1	8	4478	3022	0	2818	2123	0	1967
6	669	2699	3090	0	P	W	0	18	3563	4394	0	3954	3178	0	1967
6	670	2809	3200	0.3125	W	W	1	6	4478	4478	1	2818	2818	1	1967
6	671	2699	3088	0	P	W	0	11	3563	4394	0	3954	3178	0	1967
6	674	2040	2426	0.15625	W	W	1	3	3586	3953	0	3956	3178	0	1967
6	677	2426	2809	0	W	W	1	8	3953	4478	0	3178	2818	0	1967
6	679	2426	2807	0	W	W	1	6	3953	4478	0	3178	2818	0	1967
6	680	2046	2426	0.25	W	W	1	15	3586	3953	0	3178	3178	1	1967
6	684	2050	2426	0.15625	W	W	1	6	3586	3953	0	3956	3178	0	1967
6	688	2328	2699	0	W	P	0	19	4161	3563	0	3178	3954	0	1967
6	700	2279	2631	0	P	P	1	1	2294	3563	0	2311	3954	0	1967
6	705	2460	2809	0.5	W	W	1	12	4478	4478	1	2818	2818	1	1967
6	707	2852	3200	0	W	W	1	10	3022	4478	0	2123	2818	0	1967
6	709	2460	2807	0.5	W	W	1	10	4478	4478	1	2818	2818	1	1967
6	713	2746	3090	0	P	W	0	5	2312	4394	0	3954	3178	0	1967
6	715	2747	3090	0	P	W	0	27	2312	4394	0	3564	3178	0	1967
6	716	2746	3088	0	P	W	0	2	2312	4394	0	3954	3178	0	1967
6	718	2747	3088	0	P	W	0	20	2312	4394	0	3564	3178	0	1967
6	719	2120	2460	0	P	W	0	8	2312	4478	0	3564	2818	0	1967
6	727	2426	2747	0	W	P	0	14	3953	2312	0	3178	3564	0	1967
6	728	2426	2746	0.0078125	W	P	0	8	3953	2312	0	3178	3954	0	1967
6	734	2120	2426	0	P	W	0	4	2312	3953	0	3564	3178	0	1967
6	736	2157	2460	0	P	W	0	3	3022	4478	0	2123	2818	0	1967
6	737	2328	2631	0	W	P	0	5	4161	3563	0	3178	3954	0	1967
6	746	2631	2926	0	P	W	0	4	3563	2819	0	3954	4274	0	1967
6	756	2040	2328	0.0625	W	W	1	21	3586	4161	0	3956	3178	0	1967
6	757	2460	2747	0	W	P	0	10	4478	2312	0	2818	3564	0	1967
6	758	2460	2746	0	W	P	0	12	4478	2312	0	2818	3954	0	1967
6	759	2631	2917	0	P	W	0	11	3563	4478	0	3954	2818	0	1967
6	760	2631	2916	0	P	W	0	7	3563	4478	0	3954	2818	0	1967
6	762	2916	3200	0.6875	W	W	1	26	4478	4478	1	2818	2818	1	1967
6	765	2807	3090	0	W	W	1	7	4478	4394	0	2818	3178	0	1967
6	766	2917	3200	0.4375	W	W	1	22	4478	4478	1	2818	2818	1	1967
6	767	2046	2328	0.125	W	W	1	9	3586	4161	0	3178	3178	1	1967
6	771	2807	3088	0	W	W	1	0	4478	4394	0	2818	3178	0	1967
6	772	2809	3090	0	W	W	1	5	4478	4394	0	2818	3178	0	1967
6	776	2809	3088	0	W	W	1	2	4478	4394	0	2818	3178	0	1967
6	777	2050	2328	0.0625	W	W	1	30	3586	4161	0	3956	3178	0	1967
6	787	2926	3200	0	W	W	1	29	2819	4478	0	4274	2818	0	1967
6	788	2426	2699	0.015625	W	P	0	5	3953	3563	0	3178	3954	0	1967
6	791	2157	2426	0	P	W	0	1	3022	3953	0	2123	3178	0	1967
6	819	2040	2279	0	W	P	0	15	3586	2294	0	3956	2311	0	1967
6	820	2460	2699	0	W	P	0	1	4478	3563	0	2818	3954	0	1967
6	823	2852	3090	0	W	W	1	9	3022	4394	0	2123	3178	0	1967
6	825	2852	3088	0	W	W	1	2	3022	4394	0	2123	3178	0	1967
6	828	2046	2279	0	W	P	0	3	3586	2294	0	3178	2311	0	1967
6	830	2050	2279	0	W	P	0	24	3586	2294	0	3956	2311	0	1967
6	836	2699	2926	0	P	W	0	10	3563	2819	0	3954	4274	0	1967
6	838	2631	2852	0.0625	P	W	0	23	3563	3022	0	3954	2123	0	1967
6	839	2699	2917	0	P	W	0	3	3563	4478	0	3954	2818	0	1967
6	840	2699	2916	0	P	W	0	7	3563	4478	0	3954	2818	0	1967
6	842	2120	2328	0	P	W	0	28	2312	4161	0	3564	3178	0	1967
6	843	2426	2631	0.015625	W	P	0	19	3953	3563	0	3178	3954	0	1967
6	854	2279	2460	0	P	W	0	14	2294	4478	0	2311	2818	0	1967
6	858	2746	2926	0	P	W	0	23	2312	2819	0	3954	4274	0	1967
6	860	2747	2926	0	P	W	0	1	2312	2819	0	3564	4274	0	1967
6	862	2631	2809	0	P	W	0	27	3563	4478	0	3954	2818	0	1967
6	863	2631	2807	0	P	W	0	25	3563	4478	0	3954	2818	0	1967
6	864	2916	3090	0	W	W	1	25	4478	4394	0	2818	3178	0	1967
6	866	2917	3090	0	W	W	1	21	4478	4394	0	2818	3178	0	1967
6	867	2916	3088	0	W	W	1	18	4478	4394	0	2818	3178	0	1967
6	868	2157	2328	0	P	W	0	23	3022	4161	0	2123	3178	0	1967
6	869	2460	2631	0	W	P	0	15	4478	3563	0	2818	3954	0	1967
6	870	2746	2917	0	P	W	0	16	2312	4478	0	3954	2818	0	1967
6	871	2917	3088	0	W	W	1	14	4478	4394	0	2818	3178	0	1967
6	872	2746	2916	0	P	W	0	20	2312	4478	0	3954	2818	0	1967
6	873	2747	2917	0	P	W	0	6	2312	4478	0	3564	2818	0	1967
6	875	2747	2916	0	P	W	0	2	2312	4478	0	3564	2818	0	1967
6	887	2926	3090	0	W	W	1	28	2819	4394	0	4274	3178	0	1967
6	889	2926	3088	0	W	W	1	21	2819	4394	0	4274	3178	0	1967
6	891	2120	2279	0	P	P	1	22	2312	2294	0	3564	2311	0	1967
6	898	2699	2852	0.0625	P	W	0	9	3563	3022	0	3954	2123	0	1967
6	901	2279	2426	0	P	W	0	18	2294	3953	0	2311	3178	0	1967
6	916	2328	2460	0	W	W	1	20	4161	4478	0	3178	2818	0	1967
6	934	2157	2279	0	P	P	1	17	3022	2294	0	2123	2311	0	1967
6	940	2807	2926	0	W	W	1	21	4478	2819	0	2818	4274	0	1967
6	942	2040	2157	0	W	P	0	2	3586	3022	0	3956	2123	0	1967
6	946	2809	2926	0	W	W	1	23	4478	2819	0	2818	4274	0	1967
6	947	2631	2747	0.09375	P	P	1	5	3563	2312	0	3954	3564	0	1967
6	949	2631	2746	0.296875	P	P	1	27	3563	2312	0	3954	3954	1	1967
6	959	3088	3200	0	W	W	1	8	4394	4478	0	3178	2818	0	1967
6	960	2046	2157	0	W	P	0	14	3586	3022	0	3178	2123	0	1967
6	964	2699	2809	0	P	W	0	13	3563	4478	0	3954	2818	0	1967
6	966	2807	2917	0.25	W	W	1	14	4478	4478	1	2818	2818	1	1967
6	968	3090	3200	0	W	W	1	1	4394	4478	0	3178	2818	0	1967
6	970	2807	2916	0.25	W	W	1	18	4478	4478	1	2818	2818	1	1967
6	973	2699	2807	0	P	W	0	11	3563	4478	0	3954	2818	0	1967
6	974	2809	2917	0.25	W	W	1	16	4478	4478	1	2818	2818	1	1967
6	977	2050	2157	0	W	P	0	7	3586	3022	0	3956	2123	0	1967
6	979	2809	2916	0.25	W	W	1	20	4478	4478	1	2818	2818	1	1967
6	982	2746	2852	0.078125	P	W	0	4	2312	3022	0	3954	2123	0	1967
6	984	2747	2852	0.09375	P	W	0	18	2312	3022	0	3564	2123	0	1967
6	989	2328	2426	0.109375	W	W	1	24	4161	3953	0	3178	3178	1	1967
6	999	2040	2120	0	W	P	0	7	3586	2312	0	3956	3564	0	1967
6	1003	2046	2120	0	W	P	0	19	3586	2312	0	3178	3564	0	1967
6	1005	2852	2926	0	W	W	1	19	3022	2819	0	2123	4274	0	1967
6	1009	2050	2120	0	W	P	0	2	3586	2312	0	3956	3564	0	1967
6	1014	2631	2699	0.5	P	P	1	14	3563	3563	1	3954	3954	1	1967
6	1018	2852	2917	0	W	W	1	12	3022	4478	0	2123	2818	0	1967
6	1019	2852	2916	0	W	W	1	16	3022	4478	0	2123	2818	0	1967
6	1020	2746	2809	0	P	W	0	0	2312	4478	0	3954	2818	0	1967
6	1022	2747	2809	0	P	W	0	22	2312	4478	0	3564	2818	0	1967
6	1025	2746	2807	0	P	W	0	2	2312	4478	0	3954	2818	0	1967
6	1027	2747	2807	0	P	W	0	20	2312	4478	0	3564	2818	0	1967
6	1046	2279	2328	0	P	W	0	6	2294	4161	0	2311	3178	0	1967
6	1048	2699	2747	0.09375	P	P	1	9	3563	2312	0	3954	3564	0	1967
6	1050	2699	2746	0.296875	P	P	1	13	3563	2312	0	3954	3954	1	1967
6	1055	2807	2852	0	W	W	1	2	4478	3022	0	2818	2123	0	1967
6	1063	2809	2852	0	W	W	1	4	4478	3022	0	2818	2123	0	1967
6	1077	2120	2157	0.125	P	P	1	5	2312	3022	0	3564	2123	0	1967
6	1085	2426	2460	0	W	W	1	4	3953	4478	0	3178	2818	0	1967
6	1139	2040	2050	0.5	W	W	1	9	3586	3586	1	3956	3956	1	1967
6	1146	2916	2926	0	W	W	1	3	4478	2819	0	2818	4274	0	1967
6	1150	2917	2926	0	W	W	1	7	4478	2819	0	2818	4274	0	1967
6	1157	2040	2046	0.5	W	W	1	12	3586	3586	1	3956	3178	0	1967
6	1167	2046	2050	0.5	W	W	1	21	3586	3586	1	3178	3956	0	1967
6	1181	2807	2809	0.5	W	W	1	2	4478	4478	1	2818	2818	1	1967
6	1185	3088	3090	0.5	W	W	1	7	4394	4394	1	3178	3178	1	1967
6	1190	2746	2747	0.546875	P	P	1	22	2312	2312	1	3954	3564	0	1967
6	1192	2916	2917	0.5	W	W	1	4	4478	4478	1	2818	2818	1	1967
6	1212	3501	2040	0.1875	B	W	0	11	3712	3586	0	3956	3956	1	1967
6	1213	3501	2046	0.25	B	W	0	23	3712	3586	0	3956	3178	0	1967
6	1214	3501	2050	0.1875	B	W	0	2	3712	3586	0	3956	3956	1	1967
6	1215	3501	2120	0.03125	B	P	0	4	3712	2312	0	3956	3464	0	1967
6	1216	3501	2157	0	B	P	0	9	3712	3022	0	3956	2123	0	1967
6	1217	3501	2279	0	B	P	0	26	3712	2294	0	3956	2311	0	1967
6	1218	3501	2328	0.03125	B	W	0	32	3712	4161	0	3956	3178	0	1967
6	1219	3501	2426	0.078125	B	W	0	8	3712	3953	0	3956	3178	0	1967
6	1220	3501	2460	0	B	W	0	12	3712	4478	0	3956	2818	0	1967
6	1221	3501	2631	0.0234375	B	P	0	27	3712	3563	0	3956	3954	0	1967
6	1222	3501	2699	0.0234375	B	P	0	13	3712	3563	0	3956	3954	0	1967
6	1223	3501	2746	0.0273438	B	P	0	0	3712	2312	0	3956	3954	0	1967
6	1224	3501	2747	0.03125	B	P	0	22	3712	2313	0	3956	3564	0	1967
6	1225	3501	2807	0	B	W	0	2	3712	4478	0	3956	2818	0	1967
6	1226	3501	2809	0	B	W	0	0	3712	4478	0	3956	2818	0	1967
6	1227	3501	2852	0	B	W	0	4	3712	3022	0	3956	2123	0	1967
6	1228	3501	2916	0	B	W	0	20	3712	4478	0	3956	2818	0	1967
6	1229	3501	2917	0	B	W	0	16	3712	4478	0	3956	2818	0	1967
6	1230	3501	2926	0.03125	B	W	0	23	3712	2819	0	3956	4274	0	1967
6	1231	3501	3088	0.0625	B	W	0	2	3712	4394	0	3956	3178	0	1967
6	1232	3501	3090	0.0625	B	W	0	5	3712	4394	0	3956	3178	0	1967
6	1233	3501	3200	0	B	W	0	6	3712	4478	0	3956	2818	0	1967
7	7	2040	4044	0	W	W	1	13	3586	2819	0	3956	2815	0	1967
7	8	2046	4044	0	W	W	1	25	3586	2819	0	3178	2815	0	1967
7	9	2050	4044	0	W	W	1	4	3586	2819	0	3956	2815	0	1967
7	10	2057	4044	0	W	W	1	1	3586	2819	0	3956	2815	0	1967
7	11	2077	4044	0	W	W	1	7	3953	2819	0	3956	2815	0	1967
7	12	2081	4044	0	W	W	1	32	3953	2819	0	4176	2815	0	1967
7	13	2083	4044	0	W	W	1	8	3953	2819	0	3178	2815	0	1967
7	14	2085	4044	0	W	W	1	3	3953	2819	0	3178	2815	0	1967
7	15	2194	4044	0.1875	W	W	1	2	4478	2819	0	4274	2815	0	1967
7	19	2328	4044	0	W	W	1	34	4161	2819	0	3178	2815	0	1967
7	31	2040	3696	0.0625	W	W	1	35	3586	3953	0	3956	4176	0	1967
7	32	2046	3696	0	W	W	1	23	3586	3953	0	3178	4176	0	1967
7	33	2050	3696	0.0625	W	W	1	44	3586	3953	0	3956	4176	0	1967
7	35	2057	3696	0.0625	W	W	1	47	3586	3953	0	3956	4176	0	1967
7	41	2077	3696	0.125	W	W	1	41	3953	3953	1	3956	4176	0	1967
7	42	2426	4044	0	W	W	1	10	3953	2819	0	3178	2815	0	1967
7	43	2081	3696	0.5	W	W	1	16	3953	3953	1	4176	4176	1	1967
7	44	2083	3696	0.25	W	W	1	40	3953	3953	1	3178	4176	0	1967
7	45	2085	3696	0.25	W	W	1	45	3953	3953	1	3178	4176	0	1967
7	50	2460	4044	0.125	W	W	1	14	4478	2819	0	2818	2815	0	1967
7	56	2194	3696	0	W	W	1	46	4478	3953	0	4274	4176	0	1967
7	57	2556	4044	0	W	W	1	12	3953	2819	0	3178	2815	0	1967
7	58	2328	3696	0.09375	W	W	1	14	4161	3953	0	3178	4176	0	1967
7	61	2737	4044	0	P	W	0	47	3563	2819	0	4143	2815	0	1967
7	62	2426	3696	0.25	W	W	1	38	3953	3953	1	3178	4176	0	1967
7	63	2783	4044	0.125	W	W	1	19	4478	2819	0	2818	2815	0	1967
7	65	2806	4044	0.125	W	W	1	10	4478	2819	0	2818	2815	0	1967
7	66	2807	4044	0.125	W	W	1	4	4478	2819	0	2818	2815	0	1967
7	67	2460	3696	0	W	W	1	34	4478	3953	0	2818	4176	0	1967
7	68	2809	4044	0.125	W	W	1	2	4478	2819	0	2818	2815	0	1967
7	69	2811	4044	0.1875	W	W	1	2	4478	2819	0	2818	2815	0	1967
7	76	2040	3210	0	W	W	1	21	3586	4478	0	3956	2818	0	1967
7	77	2040	3208	0	W	W	1	15	3586	4478	0	3956	2818	0	1967
7	78	2046	3210	0	W	W	1	33	3586	4478	0	3178	2818	0	1967
7	79	2046	3208	0	W	W	1	27	3586	4478	0	3178	2818	0	1967
7	81	2040	3200	0	W	W	1	17	3586	4478	0	3956	2818	0	1967
7	82	2050	3210	0	W	W	1	12	3586	4478	0	3956	2818	0	1967
7	83	2050	3208	0	W	W	1	6	3586	4478	0	3956	2818	0	1967
7	84	2046	3200	0	W	W	1	29	3586	4478	0	3178	2818	0	1967
7	85	2057	3210	0	W	W	1	9	3586	4478	0	3956	2818	0	1967
7	87	2057	3208	0	W	W	1	3	3586	4478	0	3956	2818	0	1967
7	88	2050	3200	0	W	W	1	8	3586	4478	0	3956	2818	0	1967
7	91	2057	3200	0	W	W	1	5	3586	4478	0	3956	2818	0	1967
7	92	2556	3696	0.25	W	W	1	36	3953	3953	1	3178	4176	0	1967
7	93	2077	3210	0	W	W	1	15	3953	4478	0	3956	2818	0	1967
7	94	2077	3208	0	W	W	1	9	3953	4478	0	3956	2818	0	1967
7	95	2081	3210	0	W	W	1	40	3953	4478	0	4176	2818	0	1967
7	96	2916	4044	0.125	W	W	1	22	4478	2819	0	2818	2815	0	1967
7	97	2081	3208	0	W	W	1	34	3953	4478	0	4176	2818	0	1967
7	98	2083	3210	0	W	W	1	16	3953	4478	0	3178	2818	0	1967
7	99	2917	4044	0.125	W	W	1	18	4478	2819	0	2818	2815	0	1967
7	100	2918	4044	0.125	W	W	1	7	4478	2819	0	2818	2815	0	1967
7	101	2083	3208	0	W	W	1	10	3953	4478	0	3178	2818	0	1967
7	102	2085	3210	0	W	W	1	11	3953	4478	0	3178	2818	0	1967
7	103	2919	4044	0.125	W	W	1	1	4478	2819	0	2818	2815	0	1967
7	104	2077	3200	0	W	W	1	11	3953	4478	0	3956	2818	0	1967
7	105	2085	3208	0	W	W	1	5	3953	4478	0	3178	2818	0	1967
7	106	2081	3200	0	W	W	1	36	3953	4478	0	4176	2818	0	1967
7	107	2926	4044	0.5	W	W	1	25	2819	2819	1	4274	2815	0	1967
7	108	2083	3200	0	W	W	1	12	3953	4478	0	3178	2818	0	1967
7	109	2085	3200	0	W	W	1	7	3953	4478	0	3178	2818	0	1967
7	123	2040	3088	0.125	W	W	1	9	3586	4394	0	3956	3178	0	1967
7	125	2040	3085	0	W	W	1	26	3586	4394	0	3956	4395	0	1967
7	126	2040	3084	0.125	W	W	1	0	3586	4159	0	3956	3178	0	1967
7	129	2046	3088	0.25	W	W	1	21	3586	4394	0	3178	3178	1	1967
7	131	2046	3085	0	W	W	1	14	3586	4394	0	3178	4395	0	1967
7	132	2046	3084	0.25	W	W	1	12	3586	4159	0	3178	3178	1	1967
7	133	2050	3088	0.125	W	W	1	0	3586	4394	0	3956	3178	0	1967
7	134	2050	3085	0	W	W	1	35	3586	4394	0	3956	4395	0	1967
7	135	2050	3084	0.125	W	W	1	9	3586	4159	0	3956	3178	0	1967
7	136	2057	3088	0.125	W	W	1	3	3586	4394	0	3956	3178	0	1967
7	137	2057	3085	0	W	W	1	38	3586	4394	0	3956	4395	0	1967
7	138	2057	3084	0.125	W	W	1	12	3586	4159	0	3956	3178	0	1967
7	142	2194	3210	0.21875	W	W	1	10	4478	4478	1	4274	2818	0	1967
7	144	2194	3208	0.21875	W	W	1	4	4478	4478	1	4274	2818	0	1967
7	145	2077	3088	0	W	W	1	3	3953	4394	0	3956	3178	0	1967
7	148	2077	3085	0	W	W	1	32	3953	4394	0	3956	4395	0	1967
7	149	2077	3084	0	W	W	1	6	3953	4159	0	3956	3178	0	1967
7	150	2081	3088	0	W	W	1	28	3953	4394	0	4176	3178	0	1967
7	152	2194	3200	0.21875	W	W	1	6	4478	4478	1	4274	2818	0	1967
7	153	2040	3045	0.5	W	W	1	6	3586	3586	1	3956	3956	1	1967
7	154	2083	3088	0.125	W	W	1	4	3953	4394	0	3178	3178	1	1967
7	156	2081	3085	0	W	W	1	7	3953	4394	0	4176	4395	0	1967
7	158	2081	3084	0	W	W	1	19	3953	4159	0	4176	3178	0	1967
7	159	2085	3088	0.125	W	W	1	1	3953	4394	0	3178	3178	1	1967
7	160	2083	3085	0	W	W	1	31	3953	4394	0	3178	4395	0	1967
7	162	2083	3084	0.125	W	W	1	5	3953	4159	0	3178	3178	1	1967
7	163	2085	3085	0	W	W	1	36	3953	4394	0	3178	4395	0	1967
7	164	2046	3045	0.5	W	W	1	18	3586	3586	1	3178	3956	0	1967
7	165	2085	3084	0.125	W	W	1	10	3953	4159	0	3178	3178	1	1967
7	166	3045	4044	0	W	W	1	7	3586	2819	0	3956	2815	0	1967
7	168	2050	3045	0.5	W	W	1	3	3586	3586	1	3956	3956	1	1967
7	171	2057	3045	0.375	W	W	1	6	3586	3586	1	3956	3956	1	1967
7	177	2077	3045	0.25	W	W	1	0	3953	3586	0	3956	3956	1	1967
7	179	2081	3045	0.0625	W	W	1	25	3953	3586	0	4176	3956	0	1967
7	180	2083	3045	0.15625	W	W	1	1	3953	3586	0	3178	3956	0	1967
7	181	2085	3045	0.15625	W	W	1	4	3953	3586	0	3178	3956	0	1967
7	183	3084	4044	0	W	W	1	13	4159	2819	0	3178	2815	0	1967
7	184	2737	3696	0	P	W	0	1	3563	3953	0	4143	4176	0	1967
7	185	3085	4044	0	W	W	1	39	4394	2819	0	4395	2815	0	1967
7	186	3088	4044	0	W	W	1	4	4394	2819	0	3178	2815	0	1967
7	202	2783	3696	0	W	W	1	29	4478	3953	0	2818	4176	0	1967
7	213	2194	3088	0	W	W	1	2	4478	4394	0	4274	3178	0	1967
7	217	2194	3085	0	W	W	1	37	4478	4394	0	4274	4395	0	1967
7	219	2194	3084	0	W	W	1	11	4478	4159	0	4274	3178	0	1967
7	220	2806	3696	0	W	W	1	38	4478	3953	0	2818	4176	0	1967
7	221	2807	3696	0	W	W	1	44	4478	3953	0	2818	4176	0	1967
7	222	2809	3696	0	W	W	1	46	4478	3953	0	2818	4176	0	1967
7	223	2040	2926	0	W	W	1	12	3586	2819	0	3956	4274	0	1967
7	224	2811	3696	0	W	W	1	50	4478	3953	0	2818	4176	0	1967
7	225	2328	3210	0	W	W	1	42	4161	4478	0	3178	2818	0	1967
7	226	2046	2926	0	W	W	1	0	3586	2819	0	3178	4274	0	1967
7	227	2328	3208	0	W	W	1	36	4161	4478	0	3178	2818	0	1967
7	228	2040	2919	0	W	W	1	14	3586	4478	0	3956	2818	0	1967
7	229	2040	2918	0	W	W	1	6	3586	4478	0	3956	2818	0	1967
7	230	2040	2917	0	W	W	1	5	3586	4478	0	3956	2818	0	1967
7	231	2040	2916	0	W	W	1	9	3586	4478	0	3956	2818	0	1967
7	232	2050	2926	0	W	W	1	21	3586	2819	0	3956	4274	0	1967
7	233	2046	2919	0	W	W	1	26	3586	4478	0	3178	2818	0	1967
7	234	2046	2918	0	W	W	1	18	3586	4478	0	3178	2818	0	1967
7	235	2328	3200	0	W	W	1	38	4161	4478	0	3178	2818	0	1967
7	236	2046	2917	0	W	W	1	7	3586	4478	0	3178	2818	0	1967
7	237	2046	2916	0	W	W	1	3	3586	4478	0	3178	2818	0	1967
7	238	2050	2919	0	W	W	1	5	3586	4478	0	3956	2818	0	1967
7	239	2057	2926	0	W	W	1	24	3586	2819	0	3956	4274	0	1967
7	240	2050	2918	0	W	W	1	3	3586	4478	0	3956	2818	0	1967
7	241	2050	2917	0	W	W	1	14	3586	4478	0	3956	2818	0	1967
7	242	2050	2916	0	W	W	1	18	3586	4478	0	3956	2818	0	1967
7	243	2057	2919	0	W	W	1	2	3586	4478	0	3956	2818	0	1967
7	244	2057	2918	0	W	W	1	6	3586	4478	0	3956	2818	0	1967
7	245	2057	2917	0	W	W	1	17	3586	4478	0	3956	2818	0	1967
7	247	2057	2916	0	W	W	1	21	3586	4478	0	3956	2818	0	1967
7	251	2194	3045	0	W	W	1	5	4478	3586	0	4274	3956	0	1967
7	252	2077	2926	0	W	W	1	18	3953	2819	0	3956	4274	0	1967
7	256	2081	2926	0	W	W	1	7	3953	2819	0	4176	4274	0	1967
7	257	3200	4044	0.125	W	W	1	4	4478	2819	0	2818	2815	0	1967
7	258	2083	2926	0	W	W	1	17	3953	2819	0	3178	4274	0	1967
7	260	2077	2919	0	W	W	1	8	3953	4478	0	3956	2818	0	1967
7	261	2077	2918	0	W	W	1	0	3953	4478	0	3956	2818	0	1967
7	262	2085	2926	0	W	W	1	22	3953	2819	0	3178	4274	0	1967
7	264	2077	2917	0	W	W	1	11	3953	4478	0	3956	2818	0	1967
7	266	2077	2916	0	W	W	1	15	3953	4478	0	3956	2818	0	1967
7	267	2081	2919	0	W	W	1	33	3953	4478	0	4176	2818	0	1967
7	269	2081	2918	0	W	W	1	25	3953	4478	0	4176	2818	0	1967
7	270	2081	2917	0	W	W	1	14	3953	4478	0	4176	2818	0	1967
7	271	2083	2919	0	W	W	1	9	3953	4478	0	3178	2818	0	1967
7	272	3208	4044	0.125	W	W	1	2	4478	2819	0	2818	2815	0	1967
7	273	2081	2916	0	W	W	1	10	3953	4478	0	4176	2818	0	1967
7	274	2083	2918	0	W	W	1	1	3953	4478	0	3178	2818	0	1967
7	275	2083	2917	0	W	W	1	10	3953	4478	0	3178	2818	0	1967
7	276	2085	2919	0	W	W	1	4	3953	4478	0	3178	2818	0	1967
7	277	3210	4044	0.125	W	W	1	8	4478	2819	0	2818	2815	0	1967
7	278	2083	2916	0	W	W	1	14	3953	4478	0	3178	2818	0	1967
7	279	2085	2918	0	W	W	1	4	3953	4478	0	3178	2818	0	1967
7	281	2085	2917	0	W	W	1	15	3953	4478	0	3178	2818	0	1967
7	283	2085	2916	0	W	W	1	19	3953	4478	0	3178	2818	0	1967
7	302	2426	3210	0	W	W	1	18	3953	4478	0	3178	2818	0	1967
7	304	2426	3208	0	W	W	1	12	3953	4478	0	3178	2818	0	1967
7	307	2916	3696	0	W	W	1	26	4478	3953	0	2818	4176	0	1967
7	308	2917	3696	0	W	W	1	30	4478	3953	0	2818	4176	0	1967
7	309	2918	3696	0	W	W	1	41	4478	3953	0	2818	4176	0	1967
7	311	2919	3696	0	W	W	1	49	4478	3953	0	2818	4176	0	1967
7	312	2426	3200	0	W	W	1	14	3953	4478	0	3178	2818	0	1967
7	313	2040	2811	0	W	W	1	15	3586	4478	0	3956	2818	0	1967
7	315	2926	3696	0	W	W	1	23	2819	3953	0	4274	4176	0	1967
7	316	2040	2809	0	W	W	1	11	3586	4478	0	3956	2818	0	1967
7	319	2040	2807	0	W	W	1	9	3586	4478	0	3956	2818	0	1967
7	321	2040	2806	0	W	W	1	3	3586	4478	0	3956	2818	0	1967
7	322	2046	2811	0	W	W	1	27	3586	4478	0	3178	2818	0	1967
7	323	2046	2809	0	W	W	1	23	3586	4478	0	3178	2818	0	1967
7	326	2046	2807	0	W	W	1	21	3586	4478	0	3178	2818	0	1967
7	327	2050	2811	0	W	W	1	6	3586	4478	0	3956	2818	0	1967
7	328	2046	2806	0	W	W	1	15	3586	4478	0	3178	2818	0	1967
7	330	2328	3088	0.0625	W	W	1	30	4161	4394	0	3178	3178	1	1967
7	331	2050	2809	0	W	W	1	2	3586	4478	0	3956	2818	0	1967
7	335	2050	2807	0	W	W	1	0	3586	4478	0	3956	2818	0	1967
7	336	2328	3085	0	W	W	1	5	4161	4394	0	3178	4395	0	1967
7	337	2050	2806	0	W	W	1	6	3586	4478	0	3956	2818	0	1967
7	338	2328	3084	0.0625	W	W	1	21	4161	4159	0	3178	3178	1	1967
7	340	2057	2811	0	W	W	1	3	3586	4478	0	3956	2818	0	1967
7	341	2057	2809	0	W	W	1	1	3586	4478	0	3956	2818	0	1967
7	342	2057	2807	0	W	W	1	3	3586	4478	0	3956	2818	0	1967
7	343	2460	3210	0.3125	W	W	1	22	4478	4478	1	2818	2818	1	1967
7	344	2057	2806	0	W	W	1	9	3586	4478	0	3956	2818	0	1967
7	345	2460	3208	0.3125	W	W	1	16	4478	4478	1	2818	2818	1	1967
7	347	2040	2783	0	W	W	1	6	3586	4478	0	3956	2818	0	1967
7	348	2460	3200	0.3125	W	W	1	18	4478	4478	1	2818	2818	1	1967
7	349	2046	2783	0	W	W	1	6	3586	4478	0	3178	2818	0	1967
7	351	2077	2811	0	W	W	1	9	3953	4478	0	3956	2818	0	1967
7	354	2050	2783	0	W	W	1	15	3586	4478	0	3956	2818	0	1967
7	355	2077	2809	0	W	W	1	5	3953	4478	0	3956	2818	0	1967
7	357	2194	2926	0.25	W	W	1	23	4478	2819	0	4274	4274	1	1967
7	358	2077	2807	0	W	W	1	3	3953	4478	0	3956	2818	0	1967
7	359	2081	2811	0	W	W	1	34	3953	4478	0	4176	2818	0	1967
7	360	2077	2806	0	W	W	1	3	3953	4478	0	3956	2818	0	1967
7	361	2081	2809	0	W	W	1	30	3953	4478	0	4176	2818	0	1967
7	362	2083	2811	0	W	W	1	10	3953	4478	0	3178	2818	0	1967
7	363	2057	2783	0	W	W	1	18	3586	4478	0	3956	2818	0	1967
7	364	2081	2807	0	W	W	1	28	3953	4478	0	4176	2818	0	1967
7	365	2083	2809	0	W	W	1	6	3953	4478	0	3178	2818	0	1967
7	366	2085	2811	0	W	W	1	5	3953	4478	0	3178	2818	0	1967
7	367	2081	2806	0	W	W	1	22	3953	4478	0	4176	2818	0	1967
7	368	2194	2919	0.1875	W	W	1	3	4478	4478	1	4274	2818	0	1967
7	369	2083	2807	0	W	W	1	4	3953	4478	0	3178	2818	0	1967
7	370	2085	2809	0	W	W	1	1	3953	4478	0	3178	2818	0	1967
7	372	2194	2918	0.1875	W	W	1	5	4478	4478	1	4274	2818	0	1967
7	373	2083	2806	0	W	W	1	2	3953	4478	0	3178	2818	0	1967
7	374	2194	2917	0.1875	W	W	1	16	4478	4478	1	4274	2818	0	1967
7	375	2085	2807	0	W	W	1	1	3953	4478	0	3178	2818	0	1967
7	376	2194	2916	0.1875	W	W	1	20	4478	4478	1	4274	2818	0	1967
7	378	2085	2806	0	W	W	1	7	3953	4478	0	3178	2818	0	1967
7	382	2328	3045	0.0625	W	W	1	27	4161	3586	0	3178	3956	0	1967
7	390	2077	2783	0	W	W	1	12	3953	4478	0	3956	2818	0	1967
7	393	2081	2783	0	W	W	1	13	3953	4478	0	4176	2818	0	1967
7	396	2083	2783	0	W	W	1	11	3953	4478	0	3178	2818	0	1967
7	398	2085	2783	0	W	W	1	16	3953	4478	0	3178	2818	0	1967
7	399	2040	2737	0	W	P	0	34	3586	3563	0	3956	4143	0	1967
7	406	2046	2737	0	W	P	0	22	3586	3563	0	3178	4143	0	1967
7	408	2050	2737	0	W	P	0	43	3586	3563	0	3956	4143	0	1967
7	412	2057	2737	0	W	P	0	46	3586	3563	0	3956	4143	0	1967
7	429	2426	3088	0.125	W	W	1	6	3953	4394	0	3178	3178	1	1967
7	431	2077	2737	0	W	P	0	40	3953	3563	0	3956	4143	0	1967
7	436	2426	3085	0	W	W	1	29	3953	4394	0	3178	4395	0	1967
7	437	2426	3084	0.125	W	W	1	3	3953	4159	0	3178	3178	1	1967
7	438	2081	2737	0	W	P	0	15	3953	3563	0	4176	4143	0	1967
7	442	2083	2737	0	W	P	0	39	3953	3563	0	3178	4143	0	1967
7	444	2556	3210	0	W	W	1	20	3953	4478	0	3178	2818	0	1967
7	446	2085	2737	0	W	P	0	44	3953	3563	0	3178	4143	0	1967
7	448	2556	3208	0	W	W	1	14	3953	4478	0	3178	2818	0	1967
7	449	3045	3696	0.0625	W	W	1	41	3586	3953	0	3956	4176	0	1967
7	459	2556	3200	0	W	W	1	16	3953	4478	0	3178	2818	0	1967
7	470	2460	3088	0	W	W	1	10	4478	4394	0	2818	3178	0	1967
7	475	2460	3085	0	W	W	1	25	4478	4394	0	2818	4395	0	1967
7	476	2460	3084	0	W	W	1	1	4478	4159	0	2818	3178	0	1967
7	478	2426	3045	0.15625	W	W	1	3	3953	3586	0	3178	3956	0	1967
7	482	2194	2811	0.1875	W	W	1	4	4478	4478	1	4274	2818	0	1967
7	483	2194	2809	0.1875	W	W	1	0	4478	4478	1	4274	2818	0	1967
7	484	2194	2807	0.1875	W	W	1	2	4478	4478	1	4274	2818	0	1967
7	487	2194	2806	0.1875	W	W	1	8	4478	4478	1	4274	2818	0	1967
7	488	3084	3696	0	W	W	1	35	4159	3953	0	3178	4176	0	1967
7	492	3085	3696	0	W	W	1	9	4394	3953	0	4395	4176	0	1967
7	495	3088	3696	0	W	W	1	44	4394	3953	0	3178	4176	0	1967
7	502	2328	2926	0	W	W	1	9	4161	2819	0	3178	4274	0	1967
7	511	2328	2919	0	W	W	1	35	4161	4478	0	3178	2818	0	1967
7	514	2328	2918	0	W	W	1	27	4161	4478	0	3178	2818	0	1967
7	518	2194	2783	0.5	W	W	1	17	4478	4478	1	4274	2818	0	1967
7	519	2328	2917	0	W	W	1	16	4161	4478	0	3178	2818	0	1967
7	521	2328	2916	0	W	W	1	12	4161	4478	0	3178	2818	0	1967
7	524	2460	3045	0	W	W	1	7	4478	3586	0	2818	3956	0	1967
7	544	2194	2737	0	W	P	0	45	4478	3563	0	4274	4143	0	1967
7	560	2556	3088	0.125	W	W	1	8	3953	4394	0	3178	3178	1	1967
7	563	2556	3085	0	W	W	1	27	3953	4394	0	3178	4395	0	1967
7	566	2556	3084	0.125	W	W	1	1	3953	4159	0	3178	3178	1	1967
7	570	2040	2556	0.15625	W	W	1	1	3586	3953	0	3956	3178	0	1967
7	572	2046	2556	0.25	W	W	1	13	3586	3953	0	3178	3178	1	1967
7	573	2050	2556	0.15625	W	W	1	8	3586	3953	0	3956	3178	0	1967
7	578	2426	2926	0	W	W	1	15	3953	2819	0	3178	4274	0	1967
7	579	2057	2556	0.15625	W	W	1	11	3586	3953	0	3956	3178	0	1967
7	582	3200	3696	0	W	W	1	52	4478	3953	0	2818	4176	0	1967
7	583	2426	2919	0	W	W	1	11	3953	4478	0	3178	2818	0	1967
7	584	2426	2918	0	W	W	1	3	3953	4478	0	3178	2818	0	1967
7	585	2426	2917	0	W	W	1	8	3953	4478	0	3178	2818	0	1967
7	586	2426	2916	0	W	W	1	12	3953	4478	0	3178	2818	0	1967
7	587	2556	3045	0.15625	W	W	1	5	3953	3586	0	3178	3956	0	1967
7	588	3208	3696	0	W	W	1	50	4478	3953	0	2818	4176	0	1967
7	590	3210	3696	0	W	W	1	56	4478	3953	0	2818	4176	0	1967
7	593	2328	2811	0	W	W	1	36	4161	4478	0	3178	2818	0	1967
7	595	2328	2809	0	W	W	1	32	4161	4478	0	3178	2818	0	1967
7	596	2077	2556	0.0625	W	W	1	5	3953	3953	1	3956	3178	0	1967
7	597	2328	2807	0	W	W	1	30	4161	4478	0	3178	2818	0	1967
7	599	2328	2806	0	W	W	1	24	4161	4478	0	3178	2818	0	1967
7	600	2081	2556	0.5	W	W	1	20	3953	3953	1	4176	3178	0	1967
7	603	2083	2556	0.5	W	W	1	4	3953	3953	1	3178	3178	1	1967
7	605	2737	3210	0	P	W	0	55	3563	4478	0	4143	2818	0	1967
7	608	2085	2556	0.5	W	W	1	9	3953	3953	1	3178	3178	1	1967
7	609	2737	3208	0	P	W	0	49	3563	4478	0	4143	2818	0	1967
7	614	2460	2926	0	W	W	1	11	4478	2819	0	2818	4274	0	1967
7	616	2737	3200	0	P	W	0	51	3563	4478	0	4143	2818	0	1967
7	620	2460	2919	0.25	W	W	1	15	4478	4478	1	2818	2818	1	1967
7	624	2460	2918	0.25	W	W	1	7	4478	4478	1	2818	2818	1	1967
7	626	2460	2917	0.25	W	W	1	4	4478	4478	1	2818	2818	1	1967
7	628	2460	2916	0.25	W	W	1	8	4478	4478	1	2818	2818	1	1967
7	630	2328	2783	0	W	W	1	15	4161	4478	0	3178	2818	0	1967
7	636	2783	3210	0.4375	W	W	1	27	4478	4478	1	2818	2818	1	1967
7	638	2783	3208	0.4375	W	W	1	21	4478	4478	1	2818	2818	1	1967
7	639	2040	2460	0	W	W	1	1	3586	4478	0	3956	2818	0	1967
7	645	2783	3200	0.4375	W	W	1	23	4478	4478	1	2818	2818	1	1967
7	646	2046	2460	0	W	W	1	11	3586	4478	0	3178	2818	0	1967
7	649	2050	2460	0	W	W	1	10	3586	4478	0	3956	2818	0	1967
7	651	2328	2737	0	W	P	0	13	4161	3563	0	3178	4143	0	1967
7	653	2806	3210	0.3125	W	W	1	18	4478	4478	1	2818	2818	1	1967
7	654	2057	2460	0	W	W	1	13	3586	4478	0	3956	2818	0	1967
7	656	2807	3210	0.3125	W	W	1	12	4478	4478	1	2818	2818	1	1967
7	657	2806	3208	0.3125	W	W	1	12	4478	4478	1	2818	2818	1	1967
7	658	2807	3208	0.3125	W	W	1	6	4478	4478	1	2818	2818	1	1967
7	659	2809	3210	0.3125	W	W	1	10	4478	4478	1	2818	2818	1	1967
7	662	2809	3208	0.3125	W	W	1	4	4478	4478	1	2818	2818	1	1967
7	663	2811	3210	0.34375	W	W	1	6	4478	4478	1	2818	2818	1	1967
7	665	2811	3208	0.34375	W	W	1	0	4478	4478	1	2818	2818	1	1967
7	666	2806	3200	0.3125	W	W	1	14	4478	4478	1	2818	2818	1	1967
7	667	2807	3200	0.3125	W	W	1	8	4478	4478	1	2818	2818	1	1967
7	670	2809	3200	0.3125	W	W	1	6	4478	4478	1	2818	2818	1	1967
7	672	2811	3200	0.34375	W	W	1	2	4478	4478	1	2818	2818	1	1967
7	674	2040	2426	0.15625	W	W	1	3	3586	3953	0	3956	3178	0	1967
7	675	2426	2811	0	W	W	1	12	3953	4478	0	3178	2818	0	1967
7	676	2077	2460	0	W	W	1	7	3953	4478	0	3956	2818	0	1967
7	677	2426	2809	0	W	W	1	8	3953	4478	0	3178	2818	0	1967
7	679	2426	2807	0	W	W	1	6	3953	4478	0	3178	2818	0	1967
7	680	2046	2426	0.25	W	W	1	15	3586	3953	0	3178	3178	1	1967
7	681	2426	2806	0	W	W	1	0	3953	4478	0	3178	2818	0	1967
7	682	2081	2460	0	W	W	1	18	3953	4478	0	4176	2818	0	1967
7	683	2083	2460	0	W	W	1	6	3953	4478	0	3178	2818	0	1967
7	684	2050	2426	0.15625	W	W	1	6	3586	3953	0	3956	3178	0	1967
7	685	2085	2460	0	W	W	1	11	3953	4478	0	3178	2818	0	1967
7	690	2556	2926	0	W	W	1	13	3953	2819	0	3178	4274	0	1967
7	691	2057	2426	0.15625	W	W	1	9	3586	3953	0	3956	3178	0	1967
7	693	2556	2919	0	W	W	1	13	3953	4478	0	3178	2818	0	1967
7	694	2194	2556	0	W	W	1	10	4478	3953	0	4274	3178	0	1967
7	695	2556	2918	0	W	W	1	5	3953	4478	0	3178	2818	0	1967
7	696	2556	2917	0	W	W	1	6	3953	4478	0	3178	2818	0	1967
7	697	2556	2916	0	W	W	1	10	3953	4478	0	3178	2818	0	1967
7	698	2426	2783	0	W	W	1	9	3953	4478	0	3178	2818	0	1967
7	701	2460	2811	0.4375	W	W	1	16	4478	4478	1	2818	2818	1	1967
7	702	2737	3088	0	P	W	0	43	3563	4394	0	4143	3178	0	1967
7	704	2077	2426	0.0625	W	W	1	3	3953	3953	1	3956	3178	0	1967
7	705	2460	2809	0.5	W	W	1	12	4478	4478	1	2818	2818	1	1967
7	706	2737	3085	0	P	W	0	8	3563	4394	0	4143	4395	0	1967
7	708	3696	4044	0	W	W	1	48	3953	2819	0	4176	2815	0	1967
7	709	2460	2807	0.5	W	W	1	10	4478	4478	1	2818	2818	1	1967
7	710	2737	3084	0	P	W	0	34	3563	4159	0	4143	3178	0	1967
7	711	2460	2806	0.5	W	W	1	4	4478	4478	1	2818	2818	1	1967
7	712	2081	2426	0.25	W	W	1	22	3953	3953	1	4176	3178	0	1967
7	714	2083	2426	0.25	W	W	1	2	3953	3953	1	3178	3178	1	1967
7	717	2085	2426	0.25	W	W	1	7	3953	3953	1	3178	3178	1	1967
7	726	2460	2783	0.375	W	W	1	5	4478	4478	1	2818	2818	1	1967
7	731	2426	2737	0	W	P	0	37	3953	3563	0	3178	4143	0	1967
7	732	2737	3045	0	P	W	0	40	3563	3586	0	4143	3956	0	1967
7	735	2783	3088	0	W	W	1	15	4478	4394	0	2818	3178	0	1967
7	740	2783	3085	0	W	W	1	20	4478	4394	0	2818	4395	0	1967
7	742	2783	3084	0	W	W	1	6	4478	4159	0	2818	3178	0	1967
7	748	2916	3210	0.6875	W	W	1	30	4478	4478	1	2818	2818	1	1967
7	749	2917	3210	0.4375	W	W	1	26	4478	4478	1	2818	2818	1	1967
7	750	2916	3208	0.6875	W	W	1	24	4478	4478	1	2818	2818	1	1967
7	751	2918	3210	0.4375	W	W	1	15	4478	4478	1	2818	2818	1	1967
7	752	2917	3208	0.4375	W	W	1	20	4478	4478	1	2818	2818	1	1967
7	753	2919	3210	0.4375	W	W	1	7	4478	4478	1	2818	2818	1	1967
7	754	2918	3208	0.4375	W	W	1	9	4478	4478	1	2818	2818	1	1967
7	755	2919	3208	0.4375	W	W	1	1	4478	4478	1	2818	2818	1	1967
7	756	2040	2328	0.0625	W	W	1	21	3586	4161	0	3956	3178	0	1967
7	762	2916	3200	0.6875	W	W	1	26	4478	4478	1	2818	2818	1	1967
7	763	2926	3210	0	W	W	1	33	2819	4478	0	4274	2818	0	1967
7	766	2917	3200	0.4375	W	W	1	22	4478	4478	1	2818	2818	1	1967
7	767	2046	2328	0.125	W	W	1	9	3586	4161	0	3178	3178	1	1967
7	768	2806	3088	0	W	W	1	6	4478	4394	0	2818	3178	0	1967
7	769	2918	3200	0.4375	W	W	1	11	4478	4478	1	2818	2818	1	1967
7	770	2926	3208	0	W	W	1	27	2819	4478	0	4274	2818	0	1967
7	771	2807	3088	0	W	W	1	0	4478	4394	0	2818	3178	0	1967
7	773	2919	3200	0.4375	W	W	1	3	4478	4478	1	2818	2818	1	1967
7	775	2806	3085	0	W	W	1	29	4478	4394	0	2818	4395	0	1967
7	776	2809	3088	0	W	W	1	2	4478	4394	0	2818	3178	0	1967
7	777	2050	2328	0.0625	W	W	1	30	3586	4161	0	3956	3178	0	1967
7	779	2806	3084	0	W	W	1	3	4478	4159	0	2818	3178	0	1967
7	780	2807	3085	0	W	W	1	35	4478	4394	0	2818	4395	0	1967
7	781	2460	2737	0	W	P	0	33	4478	3563	0	2818	4143	0	1967
7	782	2807	3084	0	W	W	1	9	4478	4159	0	2818	3178	0	1967
7	783	2811	3088	0	W	W	1	6	4478	4394	0	2818	3178	0	1967
7	784	2809	3085	0	W	W	1	37	4478	4394	0	2818	4395	0	1967
7	785	2809	3084	0	W	W	1	11	4478	4159	0	2818	3178	0	1967
7	786	2811	3085	0	W	W	1	41	4478	4394	0	2818	4395	0	1967
7	787	2926	3200	0	W	W	1	29	2819	4478	0	4274	2818	0	1967
7	789	2811	3084	0	W	W	1	15	4478	4159	0	2818	3178	0	1967
7	790	2057	2328	0.0625	W	W	1	33	3586	4161	0	3956	3178	0	1967
7	795	2194	2460	0.1875	W	W	1	12	4478	4478	1	4274	2818	0	1967
7	799	2783	3045	0	W	W	1	12	4478	3586	0	2818	3956	0	1967
7	804	2556	2811	0	W	W	1	14	3953	4478	0	3178	2818	0	1967
7	805	2556	2809	0	W	W	1	10	3953	4478	0	3178	2818	0	1967
7	808	2077	2328	0	W	W	1	27	3953	4161	0	3956	3178	0	1967
7	809	2556	2807	0	W	W	1	8	3953	4478	0	3178	2818	0	1967
7	810	2556	2806	0	W	W	1	2	3953	4478	0	3178	2818	0	1967
7	812	2081	2328	0.09375	W	W	1	2	3953	4161	0	4176	3178	0	1967
7	814	2083	2328	0.109375	W	W	1	26	3953	4161	0	3178	3178	1	1967
7	815	2085	2328	0.109375	W	W	1	31	3953	4161	0	3178	3178	1	1967
7	821	2806	3045	0	W	W	1	3	4478	3586	0	2818	3956	0	1967
7	822	2807	3045	0	W	W	1	3	4478	3586	0	2818	3956	0	1967
7	824	2809	3045	0	W	W	1	5	4478	3586	0	2818	3956	0	1967
7	826	2811	3045	0	W	W	1	9	4478	3586	0	2818	3956	0	1967
7	829	2194	2426	0	W	W	1	8	4478	3953	0	4274	3178	0	1967
7	832	2328	2556	0.109375	W	W	1	22	4161	3953	0	3178	3178	1	1967
7	835	2556	2783	0	W	W	1	7	3953	4478	0	3178	2818	0	1967
7	850	2737	2926	0	P	W	0	22	3563	2819	0	4143	4274	0	1967
7	852	2737	2919	0	P	W	0	48	3563	4478	0	4143	2818	0	1967
7	855	2556	2737	0	W	P	0	35	3953	3563	0	3178	4143	0	1967
7	856	2737	2918	0	P	W	0	40	3563	4478	0	4143	2818	0	1967
7	857	2737	2917	0	P	W	0	29	3563	4478	0	4143	2818	0	1967
7	859	2737	2916	0	P	W	0	25	3563	4478	0	4143	2818	0	1967
7	867	2916	3088	0	W	W	1	18	4478	4394	0	2818	3178	0	1967
7	871	2917	3088	0	W	W	1	14	4478	4394	0	2818	3178	0	1967
7	874	2918	3088	0	W	W	1	3	4478	4394	0	2818	3178	0	1967
7	876	2916	3085	0	W	W	1	17	4478	4394	0	2818	4395	0	1967
7	877	2919	3088	0	W	W	1	5	4478	4394	0	2818	3178	0	1967
7	879	2916	3084	0	W	W	1	9	4478	4159	0	2818	3178	0	1967
7	880	2917	3085	0	W	W	1	21	4478	4394	0	2818	4395	0	1967
7	881	2917	3084	0	W	W	1	5	4478	4159	0	2818	3178	0	1967
7	882	2918	3085	0	W	W	1	32	4478	4394	0	2818	4395	0	1967
7	883	2918	3084	0	W	W	1	6	4478	4159	0	2818	3178	0	1967
7	884	2919	3085	0	W	W	1	40	4478	4394	0	2818	4395	0	1967
7	885	2919	3084	0	W	W	1	14	4478	4159	0	2818	3178	0	1967
7	886	3045	3210	0	W	W	1	15	3586	4478	0	3956	2818	0	1967
7	888	3045	3208	0	W	W	1	9	3586	4478	0	3956	2818	0	1967
7	889	2926	3088	0	W	W	1	21	2819	4394	0	4274	3178	0	1967
7	892	2926	3085	0	W	W	1	14	2819	4394	0	4274	4395	0	1967
7	893	2926	3084	0	W	W	1	12	2819	4159	0	4274	3178	0	1967
7	894	3045	3200	0	W	W	1	11	3586	4478	0	3956	2818	0	1967
7	895	2040	2194	0	W	W	1	11	3586	4478	0	3956	4274	0	1967
7	900	2046	2194	0	W	W	1	23	3586	4478	0	3178	4274	0	1967
7	904	2050	2194	0	W	W	1	2	3586	4478	0	3956	4274	0	1967
7	905	2783	2926	0	W	W	1	6	4478	2819	0	2818	4274	0	1967
7	908	2057	2194	0	W	W	1	1	3586	4478	0	3956	4274	0	1967
7	910	2783	2919	0.375	W	W	1	20	4478	4478	1	2818	2818	1	1967
7	911	2783	2918	0.375	W	W	1	12	4478	4478	1	2818	2818	1	1967
7	912	2194	2328	0	W	W	1	32	4478	4161	0	4274	3178	0	1967
7	913	2783	2917	0.375	W	W	1	1	4478	4478	1	2818	2818	1	1967
7	914	2783	2916	0.375	W	W	1	3	4478	4478	1	2818	2818	1	1967
7	916	2328	2460	0	W	W	1	20	4161	4478	0	3178	2818	0	1967
7	918	2426	2556	0.25	W	W	1	2	3953	3953	1	3178	3178	1	1967
7	921	2916	3045	0	W	W	1	15	4478	3586	0	2818	3956	0	1967
7	922	2917	3045	0	W	W	1	11	4478	3586	0	2818	3956	0	1967
7	925	2918	3045	0	W	W	1	0	4478	3586	0	2818	3956	0	1967
7	926	2919	3045	0	W	W	1	8	4478	3586	0	2818	3956	0	1967
7	927	3084	3210	0	W	W	1	21	4159	4478	0	3178	2818	0	1967
7	929	3085	3210	0	W	W	1	47	4394	4478	0	4395	2818	0	1967
7	930	3084	3208	0	W	W	1	15	4159	4478	0	3178	2818	0	1967
7	933	3085	3208	0	W	W	1	41	4394	4478	0	4395	2818	0	1967
7	935	3088	3210	0	W	W	1	12	4394	4478	0	3178	2818	0	1967
7	938	2806	2926	0	W	W	1	15	4478	2819	0	2818	4274	0	1967
7	939	3088	3208	0	W	W	1	6	4394	4478	0	3178	2818	0	1967
7	940	2807	2926	0	W	W	1	21	4478	2819	0	2818	4274	0	1967
7	941	2926	3045	0	W	W	1	18	2819	3586	0	4274	3956	0	1967
7	943	2077	2194	0	W	W	1	5	3953	4478	0	3956	4274	0	1967
7	946	2809	2926	0	W	W	1	23	4478	2819	0	2818	4274	0	1967
7	948	3084	3200	0	W	W	1	17	4159	4478	0	3178	2818	0	1967
7	951	2811	2926	0	W	W	1	27	4478	2819	0	2818	4274	0	1967
7	952	3085	3200	0	W	W	1	43	4394	4478	0	4395	2818	0	1967
7	954	2081	2194	0	W	W	1	30	3953	4478	0	4176	4274	0	1967
7	955	2806	2919	0.25	W	W	1	11	4478	4478	1	2818	2818	1	1967
7	957	2806	2918	0.25	W	W	1	3	4478	4478	1	2818	2818	1	1967
7	958	2807	2919	0.25	W	W	1	5	4478	4478	1	2818	2818	1	1967
7	959	3088	3200	0	W	W	1	8	4394	4478	0	3178	2818	0	1967
7	961	2083	2194	0	W	W	1	6	3953	4478	0	3178	4274	0	1967
7	962	2806	2917	0.25	W	W	1	8	4478	4478	1	2818	2818	1	1967
7	963	2807	2918	0.25	W	W	1	3	4478	4478	1	2818	2818	1	1967
7	965	2806	2916	0.25	W	W	1	12	4478	4478	1	2818	2818	1	1967
7	966	2807	2917	0.25	W	W	1	14	4478	4478	1	2818	2818	1	1967
7	967	2809	2919	0.25	W	W	1	3	4478	4478	1	2818	2818	1	1967
7	969	2085	2194	0	W	W	1	1	3953	4478	0	3178	4274	0	1967
7	970	2807	2916	0.25	W	W	1	18	4478	4478	1	2818	2818	1	1967
7	971	2809	2918	0.25	W	W	1	5	4478	4478	1	2818	2818	1	1967
7	974	2809	2917	0.25	W	W	1	16	4478	4478	1	2818	2818	1	1967
7	975	2811	2919	0.3125	W	W	1	1	4478	4478	1	2818	2818	1	1967
7	979	2809	2916	0.25	W	W	1	20	4478	4478	1	2818	2818	1	1967
7	980	2811	2918	0.3125	W	W	1	9	4478	4478	1	2818	2818	1	1967
7	983	2811	2917	0.3125	W	W	1	20	4478	4478	1	2818	2818	1	1967
7	985	2811	2916	0.3125	W	W	1	24	4478	4478	1	2818	2818	1	1967
7	989	2328	2426	0.109375	W	W	1	24	4161	3953	0	3178	3178	1	1967
7	990	2460	2556	0	W	W	1	2	4478	3953	0	2818	3178	0	1967
7	1004	2737	2811	0	P	W	0	49	3563	4478	0	4143	2818	0	1967
7	1006	2737	2809	0	P	W	0	45	3563	4478	0	4143	2818	0	1967
7	1011	2737	2807	0	P	W	0	43	3563	4478	0	4143	2818	0	1967
7	1013	2737	2806	0	P	W	0	37	3563	4478	0	4143	2818	0	1967
7	1053	2737	2783	0	P	W	0	28	3563	4478	0	4143	2818	0	1967
7	1054	2040	2085	0.15625	W	W	1	10	3586	3953	0	3956	3178	0	1967
7	1061	2040	2083	0.15625	W	W	1	5	3586	3953	0	3956	3178	0	1967
7	1064	3045	3088	0.125	W	W	1	3	3586	4394	0	3956	3178	0	1967
7	1065	2040	2081	0.0625	W	W	1	19	3586	3953	0	3956	4176	0	1967
7	1067	3045	3085	0	W	W	1	32	3586	4394	0	3956	4395	0	1967
7	1068	2046	2085	0.25	W	W	1	22	3586	3953	0	3178	3178	1	1967
7	1069	3045	3084	0.125	W	W	1	6	3586	4159	0	3956	3178	0	1967
7	1073	2040	2077	0.25	W	W	1	6	3586	3953	0	3956	3956	1	1967
7	1074	2046	2083	0.25	W	W	1	17	3586	3953	0	3178	3178	1	1967
7	1081	2046	2081	0	W	W	1	7	3586	3953	0	3178	4176	0	1967
7	1082	2050	2085	0.15625	W	W	1	1	3586	3953	0	3956	3178	0	1967
7	1085	2426	2460	0	W	W	1	4	3953	4478	0	3178	2818	0	1967
7	1087	2050	2083	0.15625	W	W	1	4	3586	3953	0	3956	3178	0	1967
7	1092	2046	2077	0	W	W	1	18	3586	3953	0	3178	3956	0	1967
7	1093	2050	2081	0.0625	W	W	1	28	3586	3953	0	3956	4176	0	1967
7	1096	2057	2085	0.15625	W	W	1	2	3586	3953	0	3956	3178	0	1967
7	1099	2783	2811	0.375	W	W	1	21	4478	4478	1	2818	2818	1	1967
7	1102	2050	2077	0.25	W	W	1	3	3586	3953	0	3956	3956	1	1967
7	1104	2057	2083	0.15625	W	W	1	7	3586	3953	0	3956	3178	0	1967
7	1105	2783	2809	0.375	W	W	1	17	4478	4478	1	2818	2818	1	1967
7	1108	2057	2081	0.0625	W	W	1	31	3586	3953	0	3956	4176	0	1967
7	1111	2783	2807	0.375	W	W	1	15	4478	4478	1	2818	2818	1	1967
7	1113	2783	2806	0.375	W	W	1	9	4478	4478	1	2818	2818	1	1967
7	1120	2057	2077	0.25	W	W	1	6	3586	3953	0	3956	3956	1	1967
7	1125	2040	2057	0.375	W	W	1	12	3586	3586	1	3956	3956	1	1967
7	1135	2046	2057	0.5	W	W	1	24	3586	3586	1	3178	3956	0	1967
7	1139	2040	2050	0.5	W	W	1	9	3586	3586	1	3956	3956	1	1967
7	1146	2916	2926	0	W	W	1	3	4478	2819	0	2818	4274	0	1967
7	1147	3200	3210	0.5625	W	W	1	4	4478	4478	1	2818	2818	1	1967
7	1150	2917	2926	0	W	W	1	7	4478	2819	0	2818	4274	0	1967
7	1151	2077	2085	0.0625	W	W	1	4	3953	3953	1	3956	3178	0	1967
7	1152	2918	2926	0	W	W	1	18	4478	2819	0	2818	4274	0	1967
7	1153	3200	3208	0.5625	W	W	1	2	4478	4478	1	2818	2818	1	1967
7	1154	2050	2057	0.375	W	W	1	3	3586	3586	1	3956	3956	1	1967
7	1156	2919	2926	0	W	W	1	26	4478	2819	0	2818	4274	0	1967
7	1157	2040	2046	0.5	W	W	1	12	3586	3586	1	3956	3178	0	1967
7	1159	2077	2083	0.0625	W	W	1	1	3953	3953	1	3956	3178	0	1967
7	1166	2806	2811	0.4375	W	W	1	12	4478	4478	1	2818	2818	1	1967
7	1167	2046	2050	0.5	W	W	1	21	3586	3586	1	3178	3956	0	1967
7	1168	2077	2081	0.125	W	W	1	25	3953	3953	1	3956	4176	0	1967
7	1169	2081	2085	0.5	W	W	1	29	3953	3953	1	4176	3178	0	1967
7	1172	2807	2811	0.4375	W	W	1	6	4478	4478	1	2818	2818	1	1967
7	1173	3084	3088	0.25	W	W	1	9	4159	4394	0	3178	3178	1	1967
7	1176	2806	2809	0.5	W	W	1	8	4478	4478	1	2818	2818	1	1967
7	1177	2916	2919	0.5	W	W	1	23	4478	4478	1	2818	2818	1	1967
7	1178	3085	3088	0.5	W	W	1	35	4394	4394	1	4395	3178	0	1967
7	1179	2081	2083	0.5	W	W	1	24	3953	3953	1	4176	3178	0	1967
7	1180	2083	2085	0.5	W	W	1	5	3953	3953	1	3178	3178	1	1967
7	1181	2807	2809	0.5	W	W	1	2	4478	4478	1	2818	2818	1	1967
7	1182	2809	2811	0.4375	W	W	1	4	4478	4478	1	2818	2818	1	1967
7	1183	2916	2918	0.5	W	W	1	15	4478	4478	1	2818	2818	1	1967
7	1184	2917	2919	0.5	W	W	1	19	4478	4478	1	2818	2818	1	1967
7	1186	3208	3210	0.6875	W	W	1	6	4478	4478	1	2818	2818	1	1967
7	1191	2806	2807	0.5	W	W	1	6	4478	4478	1	2818	2818	1	1967
7	1192	2916	2917	0.5	W	W	1	4	4478	4478	1	2818	2818	1	1967
7	1193	2917	2918	0.5	W	W	1	11	4478	4478	1	2818	2818	1	1967
7	1194	2918	2919	0.5	W	W	1	8	4478	4478	1	2818	2818	1	1967
7	1195	3084	3085	0	W	W	1	26	4159	4394	0	3178	4395	0	1967
7	1234	2505	2040	0	B	W	0	2	2312	3586	0	2123	3956	0	1967
7	1235	2505	2046	0	B	W	0	14	2312	3586	0	2123	3178	0	1967
7	1236	2505	2050	0	B	W	0	7	2312	3586	0	2123	3956	0	1967
7	1237	2505	2057	0	B	W	0	10	2312	3586	0	2123	3956	0	1967
7	1238	2505	2077	0	B	W	0	4	2312	3953	0	2123	3956	0	1967
7	1239	2505	2081	0	B	W	0	21	2312	3953	0	2123	4176	0	1967
7	1240	2505	2083	0	B	W	0	3	2312	3953	0	2123	3178	0	1967
7	1241	2505	2085	0	B	W	0	8	2312	3953	0	2123	3178	0	1967
7	1242	2505	2194	0	B	W	0	9	2312	4478	0	2123	4274	0	1967
7	1243	2505	2328	0	B	W	0	23	2312	4161	0	2123	3178	0	1967
7	1244	2505	2426	0	B	W	0	1	2312	3953	0	2123	3178	0	1967
7	1245	2505	2460	0	B	W	0	3	2312	4478	0	2123	2818	0	1967
7	1246	2505	2556	0	B	W	0	1	2312	3953	0	2123	3178	0	1967
7	1247	2505	2737	0	B	P	0	36	2312	3563	0	2123	4143	0	1967
7	1248	2505	2783	0	B	W	0	8	2312	4478	0	2123	2818	0	1967
7	1249	2505	2806	0	B	W	0	1	2312	4478	0	2123	2818	0	1967
7	1250	2505	2807	0	B	W	0	7	2312	4478	0	2123	2818	0	1967
7	1251	2505	2809	0	B	W	0	9	2312	4478	0	2123	2818	0	1967
7	1252	2505	2811	0	B	W	0	13	2312	4478	0	2123	2818	0	1967
7	1253	2505	2916	0	B	W	0	11	2312	4478	0	2123	2818	0	1967
7	1254	2505	2917	0	B	W	0	7	2312	4478	0	2123	2818	0	1967
7	1255	2505	2918	0	B	W	0	4	2312	4478	0	2123	2818	0	1967
7	1256	2505	2919	0	B	W	0	12	2312	4478	0	2123	2818	0	1967
7	1257	2505	2926	0	B	W	0	14	2312	2819	0	2123	4274	0	1967
7	1258	2505	3045	0	B	W	0	4	2312	3586	0	2123	3956	0	1967
7	1259	2505	3084	0	B	W	0	2	2312	4159	0	2123	3178	0	1967
7	1260	2505	3085	0	B	W	0	28	2312	4394	0	2123	4395	0	1967
7	1261	2505	3088	0	B	W	0	7	2312	4394	0	2123	3178	0	1967
7	1262	2505	3200	0	B	W	0	15	2312	4478	0	2123	2818	0	1967
7	1263	2505	3208	0	B	W	0	13	2312	4478	0	2123	2818	0	1967
7	1264	2505	3210	0	B	W	0	19	2312	4478	0	2123	2818	0	1967
7	1265	2505	3696	0	B	W	0	37	2312	3953	0	2123	4176	0	1967
7	1266	2505	4044	0	B	W	0	11	2312	2819	0	2123	2815	0	1967
34	441	2092	2747	0.375	W	P	0	11	2312	2312	1	3564	3564	1	1967
34	443	2092	2746	0.234375	W	P	0	11	2312	2312	1	3564	3954	0	1967
34	458	2092	2737	0.125	W	P	0	34	2312	3563	0	3564	4143	0	1967
34	471	2120	2747	0.5	P	P	1	18	2312	2312	1	3564	3564	1	1967
34	473	2120	2746	0.296875	P	P	1	4	2312	2312	1	3564	3954	0	1967
34	481	2120	2737	0.125	P	P	1	41	2312	3563	0	3564	4143	0	1967
34	486	2135	2747	0.0625	P	P	1	17	2312	2312	1	3178	3564	0	1967
34	490	2135	2746	0.09375	P	P	1	39	2312	2312	1	3178	3954	0	1967
34	497	2135	2737	0	P	P	1	6	2312	3563	0	3178	4143	0	1967
34	508	2092	2685	0.09375	W	P	0	11	2312	3563	0	3564	3954	0	1967
34	534	2120	2685	0.09375	P	P	1	18	2312	3563	0	3564	3954	0	1967
34	539	2135	2685	0.125	P	P	1	17	2312	3563	0	3178	3954	0	1967
34	1021	2685	2747	0.09375	P	P	1	0	3563	2312	0	3954	3564	0	1967
34	1024	2685	2746	0.296875	P	P	1	22	3563	2312	0	3954	3954	1	1967
34	1041	2685	2737	0.5	P	P	1	23	3563	3563	1	3954	4143	0	1967
34	1062	2092	2135	0.0625	W	P	0	28	2312	2312	1	3564	3178	0	1967
34	1097	2092	2120	0.375	W	P	0	7	2312	2312	1	3564	3564	1	1967
34	1127	2120	2135	0.0625	P	P	1	35	2312	2312	1	3564	3178	0	1967
34	1144	2737	2747	0.125	P	P	1	23	3563	2312	0	4143	3564	0	1967
34	1149	2737	2746	0.3125	P	P	1	45	3563	2312	0	4143	3954	0	1967
34	1190	2746	2747	0.546875	P	P	1	22	2312	2312	1	3954	3564	0	1967
21	123	2040	3088	0.125	W	W	1	9	3586	4394	0	3956	3178	0	1968
21	129	2046	3088	0.25	W	W	1	21	3586	4394	0	3178	3178	1	1968
21	133	2050	3088	0.125	W	W	1	0	3586	4394	0	3956	3178	0	1968
21	136	2057	3088	0.125	W	W	1	3	3586	4394	0	3956	3178	0	1968
21	154	2083	3088	0.125	W	W	1	4	3953	4394	0	3178	3178	1	1968
21	223	2040	2926	0	W	W	1	12	3586	2819	0	3956	4274	0	1968
21	226	2046	2926	0	W	W	1	0	3586	2819	0	3178	4274	0	1968
21	229	2040	2918	0	W	W	1	6	3586	4478	0	3956	2818	0	1968
21	231	2040	2916	0	W	W	1	9	3586	4478	0	3956	2818	0	1968
21	232	2050	2926	0	W	W	1	21	3586	2819	0	3956	4274	0	1968
21	234	2046	2918	0	W	W	1	18	3586	4478	0	3178	2818	0	1968
21	237	2046	2916	0	W	W	1	3	3586	4478	0	3178	2818	0	1968
21	239	2057	2926	0	W	W	1	24	3586	2819	0	3956	4274	0	1968
21	240	2050	2918	0	W	W	1	3	3586	4478	0	3956	2818	0	1968
21	242	2050	2916	0	W	W	1	18	3586	4478	0	3956	2818	0	1968
21	244	2057	2918	0	W	W	1	6	3586	4478	0	3956	2818	0	1968
21	247	2057	2916	0	W	W	1	21	3586	4478	0	3956	2818	0	1968
21	258	2083	2926	0	W	W	1	17	3953	2819	0	3178	4274	0	1968
21	274	2083	2918	0	W	W	1	1	3953	4478	0	3178	2818	0	1968
21	278	2083	2916	0	W	W	1	14	3953	4478	0	3178	2818	0	1968
21	319	2040	2807	0	W	W	1	9	3586	4478	0	3956	2818	0	1968
21	321	2040	2806	0	W	W	1	3	3586	4478	0	3956	2818	0	1968
21	326	2046	2807	0	W	W	1	21	3586	4478	0	3178	2818	0	1968
21	328	2046	2806	0	W	W	1	15	3586	4478	0	3178	2818	0	1968
21	335	2050	2807	0	W	W	1	0	3586	4478	0	3956	2818	0	1968
21	337	2050	2806	0	W	W	1	6	3586	4478	0	3956	2818	0	1968
21	342	2057	2807	0	W	W	1	3	3586	4478	0	3956	2818	0	1968
21	344	2057	2806	0	W	W	1	9	3586	4478	0	3956	2818	0	1968
21	369	2083	2807	0	W	W	1	4	3953	4478	0	3178	2818	0	1968
21	373	2083	2806	0	W	W	1	2	3953	4478	0	3178	2818	0	1968
21	470	2460	3088	0	W	W	1	10	4478	4394	0	2818	3178	0	1968
21	560	2556	3088	0.125	W	W	1	8	3953	4394	0	3178	3178	1	1968
21	570	2040	2556	0.15625	W	W	1	1	3586	3953	0	3956	3178	0	1968
21	572	2046	2556	0.25	W	W	1	13	3586	3953	0	3178	3178	1	1968
21	573	2050	2556	0.15625	W	W	1	8	3586	3953	0	3956	3178	0	1968
21	579	2057	2556	0.15625	W	W	1	11	3586	3953	0	3956	3178	0	1968
21	603	2083	2556	0.5	W	W	1	4	3953	3953	1	3178	3178	1	1968
21	614	2460	2926	0	W	W	1	11	4478	2819	0	2818	4274	0	1968
21	624	2460	2918	0.25	W	W	1	7	4478	4478	1	2818	2818	1	1968
21	628	2460	2916	0.25	W	W	1	8	4478	4478	1	2818	2818	1	1968
21	639	2040	2460	0	W	W	1	1	3586	4478	0	3956	2818	0	1968
21	646	2046	2460	0	W	W	1	11	3586	4478	0	3178	2818	0	1968
21	649	2050	2460	0	W	W	1	10	3586	4478	0	3956	2818	0	1968
21	654	2057	2460	0	W	W	1	13	3586	4478	0	3956	2818	0	1968
21	683	2083	2460	0	W	W	1	6	3953	4478	0	3178	2818	0	1968
21	690	2556	2926	0	W	W	1	13	3953	2819	0	3178	4274	0	1968
21	695	2556	2918	0	W	W	1	5	3953	4478	0	3178	2818	0	1968
21	697	2556	2916	0	W	W	1	10	3953	4478	0	3178	2818	0	1968
21	709	2460	2807	0.5	W	W	1	10	4478	4478	1	2818	2818	1	1968
21	711	2460	2806	0.5	W	W	1	4	4478	4478	1	2818	2818	1	1968
21	768	2806	3088	0	W	W	1	6	4478	4394	0	2818	3178	0	1968
21	771	2807	3088	0	W	W	1	0	4478	4394	0	2818	3178	0	1968
21	809	2556	2807	0	W	W	1	8	3953	4478	0	3178	2818	0	1968
21	810	2556	2806	0	W	W	1	2	3953	4478	0	3178	2818	0	1968
21	867	2916	3088	0	W	W	1	18	4478	4394	0	2818	3178	0	1968
21	874	2918	3088	0	W	W	1	3	4478	4394	0	2818	3178	0	1968
21	889	2926	3088	0	W	W	1	21	2819	4394	0	4274	3178	0	1968
21	938	2806	2926	0	W	W	1	15	4478	2819	0	2818	4274	0	1968
21	940	2807	2926	0	W	W	1	21	4478	2819	0	2818	4274	0	1968
21	957	2806	2918	0.25	W	W	1	3	4478	4478	1	2818	2818	1	1968
21	963	2807	2918	0.25	W	W	1	3	4478	4478	1	2818	2818	1	1968
21	965	2806	2916	0.25	W	W	1	12	4478	4478	1	2818	2818	1	1968
21	970	2807	2916	0.25	W	W	1	18	4478	4478	1	2818	2818	1	1968
21	990	2460	2556	0	W	W	1	2	4478	3953	0	2818	3178	0	1968
21	1061	2040	2083	0.15625	W	W	1	5	3586	3953	0	3956	3178	0	1968
21	1074	2046	2083	0.25	W	W	1	17	3586	3953	0	3178	3178	1	1968
21	1087	2050	2083	0.15625	W	W	1	4	3586	3953	0	3956	3178	0	1968
21	1104	2057	2083	0.15625	W	W	1	7	3586	3953	0	3956	3178	0	1968
21	1125	2040	2057	0.375	W	W	1	12	3586	3586	1	3956	3956	1	1968
21	1135	2046	2057	0.5	W	W	1	24	3586	3586	1	3178	3956	0	1968
21	1139	2040	2050	0.5	W	W	1	9	3586	3586	1	3956	3956	1	1968
21	1146	2916	2926	0	W	W	1	3	4478	2819	0	2818	4274	0	1968
21	1152	2918	2926	0	W	W	1	18	4478	2819	0	2818	4274	0	1968
21	1154	2050	2057	0.375	W	W	1	3	3586	3586	1	3956	3956	1	1968
21	1157	2040	2046	0.5	W	W	1	12	3586	3586	1	3956	3178	0	1968
21	1167	2046	2050	0.5	W	W	1	21	3586	3586	1	3178	3956	0	1968
21	1183	2916	2918	0.5	W	W	1	15	4478	4478	1	2818	2818	1	1968
21	1191	2806	2807	0.5	W	W	1	6	4478	4478	1	2818	2818	1	1968
55	1	2040	4401	0.03125	W	W	1	12	3586	4161	0	3956	4395	0	1970
55	2	2050	4401	0.03125	W	W	1	3	3586	4161	0	3956	4395	0	1970
55	3	2083	4401	0.0546875	W	W	1	7	3953	4161	0	3178	4395	0	1970
55	4	2085	4401	0.0546875	W	W	1	2	3953	4161	0	3178	4395	0	1970
55	5	2086	4401	0.0546875	W	W	1	5	3953	4161	0	3178	4395	0	1970
55	16	2556	4401	0.0546875	W	W	1	11	3953	4161	0	3178	4395	0	1970
55	18	2040	3757	0.03125	W	W	1	18	3586	4161	0	3956	4274	0	1970
55	20	2050	3757	0.03125	W	W	1	9	3586	4161	0	3956	4274	0	1970
55	25	2083	3757	0.0546875	W	W	1	13	3953	4161	0	3178	4274	0	1970
55	26	2085	3757	0.0546875	W	W	1	8	3953	4161	0	3178	4274	0	1970
55	27	2086	3757	0.0546875	W	W	1	1	3953	4161	0	3178	4274	0	1970
55	49	2807	4401	0	W	W	1	3	4478	4161	0	2818	4395	0	1970
55	59	3088	4401	0.15625	W	W	1	3	4394	4161	0	3178	4395	0	1970
55	60	3090	4401	0.15625	W	W	1	4	4394	4161	0	3178	4395	0	1970
55	70	2556	3757	0.0546875	W	W	1	17	3953	4161	0	3178	4274	0	1970
55	122	2040	3090	0.125	W	W	1	16	3586	4394	0	3956	3178	0	1970
55	123	2040	3088	0.125	W	W	1	9	3586	4394	0	3956	3178	0	1970
55	130	2050	3090	0.125	W	W	1	7	3586	4394	0	3956	3178	0	1970
55	133	2050	3088	0.125	W	W	1	0	3586	4394	0	3956	3178	0	1970
55	151	2083	3090	0.125	W	W	1	11	3953	4394	0	3178	3178	1	1970
55	154	2083	3088	0.125	W	W	1	4	3953	4394	0	3178	3178	1	1970
55	155	2085	3090	0.125	W	W	1	6	3953	4394	0	3178	3178	1	1970
55	157	2086	3090	0.125	W	W	1	1	3953	4394	0	3178	3178	1	1970
55	159	2085	3088	0.125	W	W	1	1	3953	4394	0	3178	3178	1	1970
55	161	2086	3088	0.125	W	W	1	8	3953	4394	0	3178	3178	1	1970
55	187	2807	3757	0	W	W	1	9	4478	4161	0	2818	4274	0	1970
55	319	2040	2807	0	W	W	1	9	3586	4478	0	3956	2818	0	1970
55	335	2050	2807	0	W	W	1	0	3586	4478	0	3956	2818	0	1970
55	369	2083	2807	0	W	W	1	4	3953	4478	0	3178	2818	0	1970
55	375	2085	2807	0	W	W	1	1	3953	4478	0	3178	2818	0	1970
55	379	2086	2807	0	W	W	1	8	3953	4478	0	3178	2818	0	1970
55	419	3088	3757	0.03125	W	W	1	9	4394	4161	0	3178	4274	0	1970
55	424	3090	3757	0.03125	W	W	1	2	4394	4161	0	3178	4274	0	1970
55	460	3757	4401	0.25	W	W	1	6	4161	4161	1	4274	4395	0	1970
55	556	2556	3090	0.125	W	W	1	15	3953	4394	0	3178	3178	1	1970
55	560	2556	3088	0.125	W	W	1	8	3953	4394	0	3178	3178	1	1970
55	570	2040	2556	0.15625	W	W	1	1	3586	3953	0	3956	3178	0	1970
55	573	2050	2556	0.15625	W	W	1	8	3586	3953	0	3956	3178	0	1970
55	603	2083	2556	0.5	W	W	1	4	3953	3953	1	3178	3178	1	1970
55	608	2085	2556	0.5	W	W	1	9	3953	3953	1	3178	3178	1	1970
55	610	2086	2556	0.5	W	W	1	16	3953	3953	1	3178	3178	1	1970
55	765	2807	3090	0	W	W	1	7	4478	4394	0	2818	3178	0	1970
55	771	2807	3088	0	W	W	1	0	4478	4394	0	2818	3178	0	1970
55	809	2556	2807	0	W	W	1	8	3953	4478	0	3178	2818	0	1970
55	1052	2040	2086	0.15625	W	W	1	17	3586	3953	0	3956	3178	0	1970
55	1054	2040	2085	0.15625	W	W	1	10	3586	3953	0	3956	3178	0	1970
55	1061	2040	2083	0.15625	W	W	1	5	3586	3953	0	3956	3178	0	1970
55	1079	2050	2086	0.15625	W	W	1	8	3586	3953	0	3956	3178	0	1970
55	1082	2050	2085	0.15625	W	W	1	1	3586	3953	0	3956	3178	0	1970
55	1087	2050	2083	0.15625	W	W	1	4	3586	3953	0	3956	3178	0	1970
55	1139	2040	2050	0.5	W	W	1	9	3586	3586	1	3956	3956	1	1970
55	1174	2083	2086	0.5	W	W	1	12	3953	3953	1	3178	3178	1	1970
55	1180	2083	2085	0.5	W	W	1	5	3953	3953	1	3178	3178	1	1970
55	1185	3088	3090	0.5	W	W	1	7	4394	4394	1	3178	3178	1	1970
55	1187	2085	2086	0.5	W	W	1	7	3953	3953	1	3178	3178	1	1970
